# Supplementary material for: Structural Constraints Identified with Covariation Analysis in Ribosomal RNA
Source: PLoS One. 2012 Jun 19;7(6):e39383. doi: 10.1371/journal.pone.0039383 (PMC3378556; doi:10.1371/journal.pone.0039383)
Supplement: Dataset S2 — The bacterial 5S rRNA sequence alignment. (FASTA) [file pone.0039383.s016.fasta]

>Accession:M76573::SeqID:2183::TaxID:2
---------------------------------------------------------------------------------------------------------------------rGA-CC-UGGUGG-CU-AU-GGC--G-G-G-AGAG-A-UCCAC-CCG-AUC--C--CAUC-CCGAA-CUCGGC-C----GUGAAA-ACCCCC-AGCG-CCU-AUG-AU-ACU-GCGGC-------UUAA---G-CCG--UGGG--AAAGUCGG-UCG--CCGCCAG-GUCU---------------------------------------------

>Accession:M76578::SeqID:2184::TaxID:2
---------------------------------------------------------------------------------------------------------------------GGA-CC-UGGUGG-CU-AU-GGC--G-G-G-AGAG-A-UCCAC-CCG-AUC--C--CAUC-CCGAA-CUCGGC-C----GUGAAA-ACCCCC-AGCG-CCU-AUG-AU-ACU-GCGGC-------UUAA---G-CCG--UGGG--AAAGUCGG-UCG--CCGCCAG-GUCC---------------------------------------------

>Accession:M34767::SeqID:2221::TaxID:2
----------------------------------------------------------------------------------------------------------------------NN-UC-UGAUGG-CC-AU-GGC--G-G-GAGCA--A-AUCAC-CCG-AUC--C--CAUC-CCGAA-CUCGGC-C----GUCAAA-UGCCCC-AGCG-CCC-AUG-AU-ACU-CUGCC-------UCAA---G-GCA--CGGA--AAAGUCGG-UCG--CCGCCAG-AUC----------------------------------------------

>Accession:M34766::SeqID:2222::TaxID:2
----------------------------------------------------------------------------------------------------------------------GA-UC-UGGUGG-CC-AU-GGC--G-G-GAGCA--A-AUCAG-CCG-AUC--C--CAUC-CCGAA-CUCGGC-C----GUCAAA-UGCCCC-AGCG-CCC-AUG-AU-ACU-CUGCC-------UCAA---G-GCA--CGGA--AAAGUCGG-UCG--CCGCCAG-AYY----------------------------------------------

>Accession:M76570::SeqID:2223::TaxID:2
---------------------------------------------------------------------------------------------------------------------NGA-UC-UGGUGG-CC-AU-GGC--G-G-G-GCGC-A-AUCAC-CCG-AUC--C--CAUC-CCGAA-CUCGGC-C----GUCAAA-UGCCCC-AGCG-CCC-AUG-AU-ACU-CUGCC-------UCAA---G-GCA--CGGA--AAAGUCGG-UCG--CCGCCAG-AUCC---------------------------------------------

>Accession:M76574::SeqID:2224::TaxID:2
---------------------------------------------------------------------------------------------------------------------NGA-UC-UGGUGG-CC-AU-GGC--G-G-CAGCA--A-AUCAC-CCG-AUC--C--CAUG-CCGAA-CUCGGC-C----GUCAAA-UGCCCC-AGCG-CCC-AUG-AU-ACU-CUGCC-------UCAA---G-GCA--CGGA--AAAGUCGG-UCG--CCGCCAG-AUCY---------------------------------------------

>Accession:M76575::SeqID:2225::TaxID:2
---------------------------------------------------------------------------------------------------------------------NGA-UC-UGGUGG-CU-AU-GGC--G-G-GAGUA--A-AUCAC-CCG-AUC--U--CAUC-CCGAA-CUCGGC-C----GUCAAA-UGCCUC-AGCG-CCC-AUG-AU-ACU-CUGCC-------UCAA---G-GCA--CGGA--AAAGUCGG-UCG--CCGCCAG-ACCC---------------------------------------------

>Accession:M76576::SeqID:2226::TaxID:2
---------------------------------------------------------------------------------------------------------------------NGA-UC-UGAUGA-CC-AU-GGC--G-G-GAGCA--A-AUCAC-CCG-AUC--C--CAUC-CCGAA-CUCGGC-C----GUCAAA-UGCCCC-AGCG-CCC-AUG-AU-ACU-CUGCC-------UCAA---G-GCA--CGGA--AAAGUCGG-UCG--CCGCCAG-AUCY---------------------------------------------

>Accession:M76580::SeqID:2227::TaxID:2
---------------------------------------------------------------------------------------------------------------------NGA-UC-UGAUGG-CC-AU-GGC--G-G-GAGCA--A-AUCAC-CCG-AUC--C--CAUC-CCGAA-CUCGGC-C----GUCAAA-UGCCCC-AGCG-CCC-AUG-AU-ACU-CUGCC-------UCAA---G-GCA--CGGA--AAAGUCGG-UCG--CCGCCAG-AUCY---------------------------------------------

>Accession:X61066::SeqID:2509::TaxID:2
-------------------------------------------------------------------------------------------------------------------------UC-UGGUGA-CG-AU-GGC--A-A-G-AUGU-U--CCAC-CUG-UUC--C--CUAC-CCGAA-UAUAGA-A----GUUAAG-CAUCUU-AGCG-CCG-ACG-AU-AGU-UA-------UUACAAU-------U--AGCG--AAAAUAGG-ACG--UUGCCAG-GC-----------------------------------------------

>Accession:X61068::SeqID:2510::TaxID:2
-------------------------------------------------------------------------------------------------------------------------UC-UGGUGA-CG-AU-GGC--A-A-G-AUGG-U-UCCAC-CUG-UUC--C--CAUC-CCGAA-CACAGA-A----GUUAAG-CAUCUU-AGCG-CCG-ACG-AU-AGU-UAUU--------ACA------AUU--AGCG--AAAAUAGG-ACG--UUGCCAG-GC-----------------------------------------------

>Accession:X05521::SeqID:2540::TaxID:2
---------------------------------------------------------------------------------------------------------------------CGA-CC-UGGUGG-UU-CU-GGC--G-G-G-GUGG-C-UGCAC-CCG-UUC--C--CAUU-CCGAA-CACGGC-C----GUGAAA-CGCCCC-AGCG-CCG-AUG-GU-ACU-UCGUC-------UUAA---G-ACG--CGGG--AGAGUAGG-UCG--CUGCCAG-GUCU---------------------------------------------

>Accession:AJ131588::SeqID:2543::TaxID:2
----------------------------------------------------------------------------------------------------------------------UG-CC-UGACGA-CC-AU-AGC--A-A-G-GUGG-U-ACCAC-UCC-UUC--C--CAUC-CCGAA-CAGGAC-A----GUGAAA-CGCCUU-CGCG-CCG-AUG-AU-AGU-GGACG-------GA-----C-GUC--UGUG--AAAGUAGG-UCA--UCGUCAG-GM-----------------------------------------------

>Accession:X05522::SeqID:2583::TaxID:2
-------------------------------------------------------------------------------------------------------------------------CC-UGACGA-CC-AU-AGC--A-A-G-GUGG-U-ACCAC-UCC-UUC--C--CAUC-CCGAA-CAGGAC-A----GUGAAA-CGCCUU-UGCG-CCG-AUG-AU-AGU-GGAC--------GGAC-----GUC--UGUG--AAAGUAGG-UCA--UCGUCAG-GCU----------------------------------------------

>Accession:X05523::SeqID:2584::TaxID:2
-------------------------------------------------------------------------------------------------------------------------CC-UGACGA-CC-AU-AGC--A-A-G-GUGG-U-ACCAC-UCC-UUC--C--CAUC-CCGAA-CAGGAC-A----GUGAAA-CGCCUU-UGCG-CCG-AUG-AU-AGU-GGAC--------GGAC-----GUC--UGUG--AAAGUAGG-UCA--UCGUCAG-GCU----------------------------------------------

>Accession:AJ131590::SeqID:2585::TaxID:2
----------------------------------------------------------------------------------------------------------------------UG-CC-UGACGA-CC-AU-AGC--A-A-G-GUGG-U-ACCAC-UCC-UUC--C--CAUC-CCGAA-CAGGAC-A----GUGAAA-CGCCUU-UGCG-CCG-AUG-AU-AGU-GGAC--------GGAC-----GUC--UGUG--AAAGUAGG-UCA--UCGUCAG-GM-----------------------------------------------

>Accession:M11546::SeqID:2700::TaxID:2
---------------------------------------------------------------------------------------------------------------------CGA-CC-UGGUGG-CC-AU-UGC--G-G-G-GGGC-C-CGCAC-CCG-AUC--C--CAUC-CCGAA-CUCGGC-C----GUGAAA-ACCCCC-AGCG-CCC-AUG-GU-ACU-GUGCC-------UCAA---G-GCA--CGGG--AGAGUAGG-UCG--CCGCCAG-GUCC---------------------------------------------

>Accession:M11545::SeqID:2705::TaxID:2
---------------------------------------------------------------------------------------------------------------------CGA-CC-UGGUGG-CC-AU-UGC--G-G-G-GAGC-C-UGCAC-CCG-AUC--C--CAUC-CCGAA-CUCGGC-C----GUGAAA-AUCCCC-AGCG-CCC-AUG-GU-ACU-GUGCC-------UCAA---G-GCA--CGGG--AGAGUAGG-UCG--CCGCCAG-GUCCUC-------------------------------------------

>Accession:M11715::SeqID:2754::TaxID:2
----------------------------------------------------------------------------------------------------------------------UG-CC-UGGUGG-CC-AU-AGC--G-A-G-CGGG-A-ACCAC-CCG-AUC--C--CAUU-CCGAA-CUCGGA-A----GUGAAA-ACGCUU-AGCG-CCG-AUG-AU-AGU-AUGGGG------UCU---CC-CUA--UGCG--AAAGUAGG-ACA--CUGCCAG-GCUU---------------------------------------------

>Accession:M11542::SeqID:2755::TaxID:2
----------------------------------------------------------------------------------------------------------------------UG-UC-UGGCGG-CC-AU-AGC--G-C-A-GUGG-A-ACCAC-CCC-UUC--C--CAUC-UCGAA-CAGGAC-C----GUGAAA-CGCUGC-AGCG-CCU-AUG-AU-AGU-UGAGGG------UCU---CC-CUC--CGCG--AAAGUCGG-UCA--CCGCCAG-ACAC---------------------------------------------

>Accession:M11541::SeqID:2843::TaxID:2
---------------------------------------------------------------------------------------------------------------------UUG-UC-UGGCGG-CC-AU-AGC--G-C-A-GUGG-A-ACCAC-CCC-UUC--C--CAUC-CCGAA-CAGGAC-C----GUGAAA-CACUGC-AGCG-CCU-AUG-AU-AGU-UGAGGG------CCU---CC-CUC--CGCG--AAAGUCGG-UCA--CCGCCAG-ACAC---------------------------------------------

>Accession:M76571::SeqID:2928::TaxID:2
---------------------------------------------------------------------------------------------------------------------NGA-UC-UGGUGG-CC-AU-GGC--G-G-GAGCA--A-AUCAG-CCG-AUC--C--CAUC-CCGAA-CUCGGC-C----GUCAAA-UGCCCC-AGCG-CCC-AUG-AU-ACU-CUGCC-------UCAA---G-GCA--CGGA--AAAGUCGG-UCG--CCGCCAG-AUCY---------------------------------------------

>Accession:AJ131583::SeqID:2949::TaxID:2
----------------------------------------------------------------------------------------------------------------------UG-CC-UGAUGA-CC-AU-AGC--A-A-G-UUGG-U-CCCAC-UCC-UUC--C--CAUC-CCGAA-CAGGAC-A----GUGAAA-CGACUU-UGCG-CCG-AUG-AU-AGU-GCGG--------GUUC-----CCG--UGUG--AAAGUAGG-UCA--UCGUCAG-GC-----------------------------------------------

>Accession:AJ131584::SeqID:2954::TaxID:2
----------------------------------------------------------------------------------------------------------------------UG-CC-UGAUGA-CC-AU-AGC--A-A-G-UUGG-U-ACCAC-UCC-UUC--C--CAUC-CCGAA-CAGGAC-A----GUGAAA-CGACUU-UGCG-CCG-AUG-AU-AGU-GCGG--------GUUC-----CCG--UGUG--AAAGUAGG-UCA--UCGUCAG-GC-----------------------------------------------

>Accession:AJ131585::SeqID:3030::TaxID:2
----------------------------------------------------------------------------------------------------------------------UG-CC-UGAUGA-CC-AU-AGC--A-A-G-UUGG-U-ACCAC-UCC-UUC--C--CAUC-CCGAA-CAGGAC-A----GUGAAA-CGACUU-UGCG-CCG-AUG-AU-AGU-GCGG--------GUUC-----CCG--UGUG--AAAGUAGG-UCA--UCGUCAG-GC-----------------------------------------------

>Accession:X02631::SeqID:3107::TaxID:2
-----------------------------------------------------------------------------------------------------------------------G-GC-UGGCGA-CC-AU-AGC--A-A-G-AGUG-A-ACCAC-CUG-AUC--C--CUUC-CCGAA-CUCAGA-A----GUGAAA-CCUCUU-CGCG-CUG-AUG-GU-AGU-GNGGG-------UUA----C-CCA--UGUG--AGAGUAAG-UCA--UCGCCAG-CUU----------------------------------------------

>Accession:CR543861::SeqID:3307::TaxID:2
-------------------------------------------------------------------------------------------------------------------------GC-UGGCGA-CA-AU-AGC--A-A-G-AGUG-A-ACCAC-CUG-AUC--C--CUUC-CCGAA-CUCAGA-A----GUGAAA-CCUCUU-CGCG-CUG-AUG-GU-AGU-GUGGC-------GUUA---G-CCA--UGUG--AGAGUAAG-UCA--UCGCCAG-CUU----------------------------------------------

>Accession:CR543861::SeqID:3308::TaxID:2
-------------------------------------------------------------------------------------------------------------------------GC-UGGCGA-CA-AU-AGC--A-A-G-AGUG-A-ACCAC-CUG-AUC--C--CUUC-CCGAA-CUCAGA-A----GUGAAA-CCUCUU-CGCG-CUG-AUG-GU-AGU-GUGGC-------GUUA---G-CCA--UGUG--AGAGUAAG-UCA--UCGCCAG-CUU----------------------------------------------

>Accession:CR543861::SeqID:3309::TaxID:2
-------------------------------------------------------------------------------------------------------------------------GC-UGGCGA-CA-AU-AGC--A-A-G-AGUG-A-ACCAC-CUG-AUC--C--CUUC-CCGAA-CUCAGA-A----GUGAAA-CCUCUU-CGCG-CUG-AUG-GU-AGU-GUGGC-------GUUA---G-CCA--UGUG--AGAGUAAG-UCA--UCGCCAG-CUU----------------------------------------------

>Accession:CR543861::SeqID:3310::TaxID:2
-------------------------------------------------------------------------------------------------------------------------GC-UGGCGA-CA-AU-AGC--A-A-G-AGUG-A-ACCAC-CUG-AUC--C--CUUC-CCGAA-CUCAGA-A----GUGAAA-CCUCUU-CGCG-CUG-AUG-GU-AGU-GUGGC-------GUUA---G-CCA--UGUG--AGAGUAAG-UCA--UCGCCAG-CUU----------------------------------------------

>Accession:CR543861::SeqID:3311::TaxID:2
--------------------------------------------------------------------------------------------------------------------------C-UGGCGA-CA-AU-AGC--A-A-G-AGUG-A-ACCAC-CUG-AUC--C--CUUC-CCGAA-CUCAGA-A----GUGAAA-CCUCUU-CGCG-CUG-AUG-GU-AGU-GUGGC-------GUUA---G-CCA--UGUG--AGAGUAAG-UCA--UCGCCAG-CUUU---------------------------------------------

>Accession:CR543861::SeqID:3312::TaxID:2
--------------------------------------------------------------------------------------------------------------------------C-UGGCGA-CA-AU-AGC--A-A-G-AGUG-A-ACCAC-CUG-AUC--C--CUUC-CCGAA-CUCAGA-A----GUGAAA-CCUCUU-CGCG-CUG-AUG-GU-AGU-GUGGC-------GUUA---G-CCA--UGUG--AGAGUAAG-UCA--UCGCCAG-CUUU---------------------------------------------

>Accession:CR543861::SeqID:3313::TaxID:2
--------------------------------------------------------------------------------------------------------------------------C-UGGCGA-CA-AU-AGC--A-A-G-AGUG-A-ACCAC-CUG-AUC--C--CUUC-CCGAA-CUCAGA-A----GUGAAA-CCUCUU-CGCG-CUG-AUG-GU-AGU-GUGGC-------GUUA---G-CCA--UGUG--AGAGUAAG-UCA--UCGCCAG-CUUU---------------------------------------------

>Accession:Z50737::SeqID:5375::TaxID:2
-----------------------------------------------------------------------------------------------------------------------G-UAACGGCGG-UC-AU-AGC--G-G-U-GGGG-A-AACGC-CCG-GUC--C--CAUC-CCGAA-CCCGGA-A----GCUAAG-CCCACC-AGCG-CCG-AUG-GU-ACU-GCACUC------GUGA--GG-GUG--UGGG--AGAGUAGG-ACG--CCGCCGG-ACU----------------------------------------------

>Accession:D13615::SeqID:5415::TaxID:2
----------------------------------------------------------------------------------------------------------------------CG-UU-CGGUGG-UU-UU-GGC--G-A-G-GGGG-A-AACAC-CCG-GUC--C--CAUU-CCGAA-CCCGGA-A----GUUAAG-CCUCUC-AGCG-CCG-AUG-GU-ACU-GCAUGG------GAGA--CU-GUG--UGGG--AGAGUAGG-ACA--CCGCCGG-ACUU---------------------------------------------

>Accession:X81575::SeqID:5843::TaxID:2
----------------------------------------------------------------------------------------------------------------------GU-UU-CGAUGG-UC-AU-AGC--U-G-U-UUC--------------------------------------------------------------------------------------------------------------------------------------------------------------------------------------

>Accession:X00931::SeqID:7036::TaxID:2
----------------------------------------------------------------------------------------------------------------------UG-CC-UGGCGG-CC-AU-AGC--G-C-C-GUGG-A-ACCAC-CUG-AUC--C--CAUG-CCGAA-CUCAGA-A----GUGAAA-CGCGGU-AGCG-CCG-AUG-GU-AGU-GUGGC-------AUUU---G-CCA--UGCG--AGAGUAGG-ACA--CUGCCAG-GCA----------------------------------------------

>Accession:X02259::SeqID:7113::TaxID:2
----------------------------------------------------------------------------------------------------------------------UG-CC-UGGCGG-CC-AU-AGC--G-C-C-GUGG-A-ACCAC-CUG-AUC--C--CAUG-CCGAA-CUCAGA-A----GUGAAA-CGCGGU-AGCG-CCG-AUG-GU-AGU-GUGGC-------AUUU---G-CCA--UGUG--AGAGUAGG-ACA--CUGCCAG-GCAU---------------------------------------------

>Accession:X02258::SeqID:7144::TaxID:2
----------------------------------------------------------------------------------------------------------------------UG-CC-UGGCGG-CC-AU-AGC--G-C-C-GUGG-A-ACCAC-CUG-AUU--C--CAUG-CCGAA-CUCAGA-A----GUGAAA-CGCGGU-AGCG-CCG-AUG-GU-AGU-GUGGC-------AUUU---G-CCA--UGUG--AGAGUAGG-ACA--CUGCCAG-GCAU---------------------------------------------

>Accession:X02627::SeqID:8785::TaxID:2
---------------------------------------------------------------------------------------------------------------------CGA-CC-UGGUGG-UC-AU-CGC--G-G-G-GCGG-C-UGCAC-CCG-UUC--C--CUUU-CCGAA-CACGGC-C----GUGAAA-CGCCCC-AGCG-CCA-AUG-GU-ACU-UCGUC-------UCAA---G-ACG--CGGG--AGAGUAGG-UCG--CUGCCAG-GUCU---------------------------------------------

>Accession:AB102733::SeqID:8786::TaxID:2
---------------------------------------------------------------------------------------------------------------UUUUGCCGA-CC-UGGUGG-UU-AU-CGC--G-G-G-GCGG-C-UGCAC-CCG-UUC--C--CUUU-CCGAA-CACGGC-C----G-GAAA-CGCCCC-AGCG-CCA-AUG-GU-ACU-UCGUC-------UCAA---G-ACG--CGGG--AGAGUAGG-UCG--CUGCCAG-GUCUGCAAAACGCAACACAAA----------------------------

>Accession:AB102732::SeqID:8787::TaxID:2
---------------------------------------------------------------------------------------------------------------UUUUGCCGA-CC-UGGUGG-UU-AU-CGC--G-G-G-GCGG-C-UGCAC-CCG-UUC--C--CUUU-CCGAA-CACGGC-C----GUGAAA-CGCCCC-AGCG-CCA-AUG-GU-ACU-UCGUC-------UCAA---G-ACG--CGGG--AGAGUAGG-UCG--CUGCCAG-GUCUGCAAAACGCAACACAAA----------------------------

>Accession:AB102734::SeqID:8788::TaxID:2
---------------------------------------------------------------------------------------------------------------UUUUGCCGA-CC-UGGUGG-UU-AU-CGC--G-G-G-GCGG-C-UGCAC-CCG-UUC--C--CUUU-CCGAA-CACGGC-C----GUGAAA-CGCCCC-AGCG-CCA-AUG-GU-ACU-UCGUC-------UCAA---G-ACG--CGGG--AGAGUAGG-UCG--CUGCCAG-GUCUGCAAAACGCAACACAAA----------------------------

>Accession:AB102735::SeqID:8789::TaxID:2
---------------------------------------------------------------------------------------------------------------UUUUGCCGA-CC-UGGUGG-UU-AU-CGC--G-G-G-GCGG-C-UGCAC-CCG-UUC--C--CUUU-CCGAA-CACGGC-C----GUGAAA-CGCCCC-AGCG-CCA-AUG-GU-ACU-UCGUC-------UCAA---G-ACG--CGGG--AGAGUAGG-UCG--CUGCCAG-GUCUGCAAAACGCAACACAAA----------------------------

>Accession:AE008265::SeqID:8944::TaxID:2
---------------------------------------------------------------------------------------------------------------------CGA-CC-UGGUGG-UU-AU-CGC--G-G-G-GCGG-C-UGCAC-CCG-UUC--C--CAUU-CCGAA-CACGGC-C----GUGAAA-CGCCCC-AGCG-CCA-AUG-GU-ACU-UCGUC-------UCAA---G-ACG--CGGG--AGAGUAGG-UCG--CUGCCAG-GUC----------------------------------------------

>Accession:AE008289::SeqID:8945::TaxID:2
---------------------------------------------------------------------------------------------------------------------CGA-CC-UGGUGG-UU-AU-CGC--G-G-G-GCGG-C-UGCAC-CCG-UUC--C--CAUU-CCGAA-CACGGC-C----GUGAAA-CGCCCC-AGCG-CCA-AUG-GU-ACU-CCGUC-------UCAA---G-ACG--CGGG--AGAGUAGG-UCG--CUGCCAG-GUC----------------------------------------------

>Accession:AE008980::SeqID:8947::TaxID:2
---------------------------------------------------------------------------------------------------------------------CGA-CC-UGGUGG-UU-AU-CGC--G-G-G-GCGG-C-UGCAC-CCG-UUC--C--CAUU-CCGAA-CACGGC-C----GUGAAA-CGCCCC-AGCG-CCA-AUG-GU-ACU-CCGUC-------UCAA---G-ACG--CGGG--AGAGUAGG-UCG--CUGCCAG-GUCUGCA------------------------------------------

>Accession:AE009200::SeqID:8948::TaxID:2
----------------------------------------------------------------------------------------------------------------------------UGGUGG-UU-AU-CGC--G-G-G-GCGG-C-UGCAC-CCG-UUC--C--CAUU-CCGAA-CACGGC-C----GUGAAA-CGCCCC-AGCG-CCA-AUG-GU-ACU-CCGUC-------UCAA---G-ACG--CGGG--AGAGUAGG-UCG--CUGCCAG-GUCUGCAAAACG-------------------------------------

>Accession:AE009325::SeqID:8949::TaxID:2
---------------------------------------------------------------------------------------------------------------------CGA-CC-UGGUGG-UU-AU-CGC--G-G-G-GCGG-C-UGCAC-CCG-UUC--C--CAUU-CCGAA-CACGGC-C----GUGAAA-CGCCCC-AGCG-CCA-AUG-GU-ACU-CCGUC-------UCAA---G-ACG--CGGG--AGAGUAGG-UCG--CUGCCAG-GUCUGCA------------------------------------------

>Accession:AE009348::SeqID:8950::TaxID:2
---------------------------------------------------------------------------------------------------------------------CGA-CC-UGGUGG-UU-AU-CGC--G-G-G-GCGG-C-UGCAC-CCG-UUC--C--CAUU-CCGAA-CACGGC-C----GUGAAA-CGCCCC-AGCG-CCA-AUG-GU-ACU-UCGUC-------UCAA---G-ACG--CGGG--AGAGUAGG-UCG--CUGCCAG-GUCUGCA------------------------------------------

>Accession:U45329::SeqID:8955::TaxID:2
----------------------------------------------------------------------------------------------------------------------GA-CC-UGGUGG-UC-AU-GGC--G-G-G-GCGG-C-CGCAC-CCG-UUC--C--CAUU-CCGAA-CACGGC-C----GUGAAA-CGCCCC-UGCG-CCA-AUG-GU-ACU-UCGUC-------UUAA---G-ACG--CGGG--AGAGUAGG-UCG--CUGCCAG-GUCU---------------------------------------------

>Accession:AJ131586::SeqID:10502::TaxID:2
----------------------------------------------------------------------------------------------------------------------UG-CU-UGACGA-CC-AU-AGC--G-A-G-GUGG-U-CCCAC-ACC-UUC--C--CAUC-CCGAA-CAGGAU-U----GUGAAA-CGCCUU-UGCG-CCG-AUG-AU-AGU-GGAC--------GGAC-----GUC--UGUG--AAAGUAGG-UCA--UCGUCAA-GC-----------------------------------------------

>Accession:X02628::SeqID:10503::TaxID:2
-----------------------------------------------------------------------------------------------------------------------G-CU-UGACGA-CC-AU-AGC--G-A-G-GUGG-U-CCCAC-ACC-UUC--C--CAUC-CCGAA-CAGGAU-U----GUGAAA-CGCCUU-UGCG-CCG-AUG-AU-AGU-GGACG-------GA-----C-GUC--UGUG--AAAGUAGG-UCA--UCGUCAA-GCU----------------------------------------------

>Accession:X05518::SeqID:10504::TaxID:2
-----------------------------------------------------------------------------------------------------------------------G-CU-UGACGA-CC-AU-AGC--G-A-G-GUGG-U-CCCAC-ACC-UUC--C--CAUC-CCGAA-CAGGAU-U----GUGAAA-CGCCUU-UGCG-CCG-AUG-AU-AGU-GGACG-------GA-----C-GUC--UGUG--AAAGUAGG-UCA--UCGUCAA-GCU----------------------------------------------

>Accession:D00104::SeqID:10505::TaxID:2
-----------------------------------------------------------------------------------------------------------------------G-CU-UGACGA-CC-AU-AGC--G-A-G-GUGG-U-CCCAC-ACC-UUC--C--CAUC-CCGAA-CAGGAU-U----GUGAAA-CGCCUU-UGCG-CCG-AUG-AU-AGU-GGACG-------GA-----C-GUC--UGUG--AAAGUAGG-UCA--UCGUCAA-GCU----------------------------------------------

>Accession:X05517::SeqID:10506::TaxID:2
----------------------------------------------------------------------------------------------------------------------UG-CU-UGACGA-CC-AU-AGA--G-C-G-UUGG-A-ACCAC-CUG-AUC--C--CAUC-CCGAA-CUCAGC-A----GUGAAA-CGACGC-AUCG-CCG-AUG-GU-AGU-GUGGGG------UCU---CC-CCA--UGUG--AGAGUAGG-UCA--UCGUCAA-GCUU---------------------------------------------

>Accession:X05524::SeqID:10530::TaxID:2
--------------------------------------------------------------------------------------------------------------------UUAG-CC-UGACGA-CC-AU-AGC--A-A-G-GUGG-U-ACCAC-UCC-UUC--C--CAUC-CCGAA-CAGGAC-A----GUGAAA-CGCCUU-UGCG-CCG-AUG-AU-AGU-GGAC--------GGAC-----GUC--UGUG--AAAGUAGG-UCA--UCGUCAG-GCU----------------------------------------------

>Accession:X13662::SeqID:14290::TaxID:2
-------------------------------------------------------------------------------------------------------------------------CU-UCGUGA-CA-AU-AGC--G-A-A-GAGG-U-CACAC-CUG-UUC--C--CAUA-CCGAA-CACAGA-A----GUCAAG-CUCUUC-AGCG-CCG-AUG-GU-AGU-UGGGGG------UUUU--CC-CCC--UGCG--AGAGUAGG-ACG--UCGCUAA-G------------------------------------------------

>Accession:AJ243302::SeqID:14750::TaxID:2
-----------------------------------------------------------------------------------------------------------------------G-UUUCGGUGG-UU-AU-AGC--G-G-C-GGGG-A-AACGC-CCG-GUC--C--CAUU-CCGAA-CCCGGA-A----GCUAAG-CCUGCC-AGCG-CCG-AUG-GU-ACU-GCACUC------GAAG--GG-GUG--UGGG--AGAGUAGG-ACG--CCGCCGA-ACU----------------------------------------------

>Accession:Z50059::SeqID:14754::TaxID:2
-----------------------------------------------------------------------------------------------------------------------G-UUUCGGUGG-UU-UU-AGC--G-U-C-AGGG-A-AACGC-CCG-GUC--C--CAUU-CCGAA-CCCGGA-A----GCUAAG-CCUGAC-AGCG-CCG-AUG-GU-ACU-GCAACC------GAAG--GG-UUG--UGGG--AGAGUAGG-ACA--CCGCCGA-ACU----------------------------------------------

>Accession:Z50060::SeqID:14760::TaxID:2
-----------------------------------------------------------------------------------------------------------------------G-UUUCGGUGG-UU-AU-GGC--G-G-U-AGGG-A-AACGC-CCG-GUC--C--CAUU-CCGAA-CCCGGA-A----GCUAAG-CCUGCC-AGCG-CCG-AUG-GU-ACU-GCACCC------CCGC--GG-GUG--UGGG--AGAGUAGG-ACA--CCGCCGA-ACA----------------------------------------------

>Accession:X81576::SeqID:14765::TaxID:2
-----------------------------------------------------------------------------------------------------------------------G-UUUCGAUGG-UC-AU-AGC--U-G-U-UUC--------------------------------------------------------------------------------------------------------------------------------------------------------------------------------------

>Accession:Z50061::SeqID:14767::TaxID:2
-----------------------------------------------------------------------------------------------------------------------G-UUUCGGUGG-UC-AU-AGC--G-U-C-AGGG-A-AACGC-CCG-GUC--C--CAUU-CCGAA-CCCGGA-A----GCUAAG-CCUGAC-AGCG-CCG-AUG-GU-ACU-GCAACC------GAAG--GG-UUG--UGGG--AGAGUAGG-ACA--CCGCCGG-ACU----------------------------------------------

>Accession:CP000117::SeqID:15088::TaxID:2
----------------------------------------------------------------------------------------------------------------------------------------------------GUGG-A-ACCACUCUG-AUU--C--CAUC-CCGAA-CUCAGU-U----GUGAAA-CGCUGC-UACG-GCU-ACG-AU-AGU-CUAGGG------GUUG--CC-CUA--UGCC--ACAAUCGC---------------------------------------------------------------

>Accession:CP000117::SeqID:15089::TaxID:2
----------------------------------------------------------------------------------------------------------------------------------------------------GUGG-A-ACCACUCUG-AUU--C--CAUC-CCGAA-CUCAGU-U----GUGAAA-CGCUGC-UACG-GCU-ACG-AU-AGU-CUAGGG------GUUG--CC-CUA--UGCC--ACAAUCGC---------------------------------------------------------------

>Accession:CP000117::SeqID:15090::TaxID:2
----------------------------------------------------------------------------------------------------------------------------------------------------GUGG-A-ACCACUCUG-AUU--C--CAUC-CCGAA-CUCAGU-U----GUGAAA-CGCUGC-UACG-GCU-ACG-AU-AGU-CUAGGG------GUUG--CC-CUA--UGCC--ACAAUCGC---------------------------------------------------------------

>Accession:CP000117::SeqID:15091::TaxID:2
----------------------------------------------------------------------------------------------------------------------------------------------------GUGG-A-ACCACUCUG-AUU--C--CAUC-CCGAA-CUCAGU-U----GUGAAA-CGCUGC-UACG-GCU-ACG-AU-AGU-CUAGGG------GUUG--CC-CUA--UGCC--ACAAUCGC---------------------------------------------------------------

>Accession:CP000251::SeqID:15202::TaxID:2
-------------------------------------------------------------------------------------------------------------------------UG-CGGUGG-CU-AU-AUC--G-G-U-GGGG-U-CACAC-CCG-UUC--C--CAUC-CCGAA-CACGGU-A----GUUAAG-CCCACC-AGAG-CCG-AUG-GU-ACU-GCACCG------GAAG--CG-GUG--UGGG--AGAGUAGG-UCG--CUGCCGC-AU-----------------------------------------------

>Accession:CP000251::SeqID:15203::TaxID:2
-------------------------------------------------------------------------------------------------------------------------UG-CGGUGG-CU-AU-AUC--G-G-U-GGGG-U-CACAC-CCG-UUC--C--CAUC-CCGAA-CACGGU-A----GUUAAG-CCCACC-AGAG-CCG-AUG-GU-ACU-GCACCG------GAAG--CG-GUG--UGGG--AGAGUAGG-UCG--CUGCCGC-AU-----------------------------------------------

>Accession:AY048815::SeqID:15313::TaxID:2
---------------------------------------------------------------------------------------------------------------------UUG-GC-UGGUGG-UU-AU-GGC--G-G-G-AGUG-A-AACAC-CCG-GUA--A--CAUC-CCGAA-CCCGGA-A----GUUAAG-CCUCCC-AGCG-CCU-GUG-GU-ACU-UUGUC-------UUAA---G-ACA--CGGG--AGAGAGGG-UCG--CUGCCAG-CCUU---------------------------------------------

>Accession:AF416766::SeqID:15368::TaxID:2
----------------------------------------------------------------------------------------------------------------------UG-GC-UGGUGG-UA-AU-GGC--A-G-G-AGUG-A-AACAC-CCG-GUA--A--CAUU-CCGAA-CCCGGA-A----GUUAAG-CCUCCU-AGCG-CCU-GUG-GU-ACU-UUGUC-------UUAA---G-ACA--UGGG--AGAGAGGG-UCG--CUGCCAG-CCAA---------------------------------------------

>Accession:CP000235::SeqID:15433::TaxID:2
-----------------------------------------------------------------------------------------------------------------------G-GC-UGGUGG-UA-AU-GGC--A-G-G-AGUG-A-AACAC-CCG-GUA--A--CAUU-CCGAA-CCCGGA-A----GUUAAG-CCUCCU-AGCG-CCU-GUG-GU-ACU-UUGUC-------UUAA---G-ACA--UGGG--AGA--------------------------------------------------------------------

>Accession:M34775::SeqID:15615::TaxID:2
-------------------------------------------------------------------------------------------------------------------------CC-UGGUGG-CC-AU-UGC--G-A-G-GAGC-C-CCAAC-CCG-AUC--C--CAUC-CCGAA-CUCGGC-C----GUUAAA-CUCCUC-AGCG-CCG-AUG-GU-ACU-AUGUC-------UCAA---G-ACC--UGGG--AGAGUAGG-UCG--CUGCCAG-GCCU---------------------------------------------

>Accession:X02630::SeqID:20382::TaxID:2
----------------------------------------------------------------------------------------------------------------------UG-CU-UGGCGG-CC-AU-AGC--G-A-G-UUGG-U-ACCAC-CCC-UUC--C--CUUC-CCGAA-CAGGAC-C----GUGAAA-CGACUC-AGCG-CCG-AUG-AU-AGU-GCAGA-------UC-----C-CUG--UGUG--AAAGUAGG-UCU--CCGCCAA-GCU----------------------------------------------

>Accession:AE000709::SeqID:20413::TaxID:2
----------------------------------------------------------------------------------------------------------------------CC-CC-UGGUGG-CC-AU-AGC--G-G-G-GGGG-A-AACAC-CCG-GUC--C--CAUU-CCGAA-CCCGGC-A----GUUAAG-CCCCCC-AGCG-CCG-AUG-AU-ACU-GUGCCG------GCAG--CG-GCA--CGGG--AAAGUAGG-UCG--CUGCCAG-GGG----------------------------------------------

>Accession:AE000752::SeqID:20414::TaxID:2
----------------------------------------------------------------------------------------------------------------------CC-CC-UGGUGG-CC-AU-AGC--G-G-G-GGGG-A-AACAC-CCG-GUC--C--CAUU-CCGAA-CCCGGC-A----GUUAAG-CCCCCC-AGCG-CCG-AUG-AU-ACU-GUGCCG------GCAG--CG-GCA--CGGG--AAAGUAGG-UCG--CUGCCAG-GGG----------------------------------------------

>Accession:AE000657::SeqID:20415::TaxID:2
----------------------------------------------------------------------------------------------------------------------CC-CC-UGGUGG-CC-AU-AGC--G-G-G-GGGG-A-AACAC-CCG-GUC--C--CAUU-CCGAA-CCCGGC-A----GUUAAG-CCCCCC-AGCG-CCG-AUG-AU-ACU-GUGCCG------GCAG--CG-GCA--CGGG--AAAGUAGG-UCG--CUGCCAG-GGG----------------------------------------------

>Accession:AE000657::SeqID:20416::TaxID:2
----------------------------------------------------------------------------------------------------------------------CC-CC-UGGUGG-CC-AU-AGC--G-G-G-GGGG-A-AACAC-CCG-GUC--C--CAUU-CCGAA-CCCGGC-A----GUUAAG-CCCCCC-AGCG-CCG-AUG-AU-ACU-GUGCCG------GCAG--CG-GCA--CGGG--AAAGUAGG-UCG--CUGCCAG-GGG----------------------------------------------

>Accession:X08002::SeqID:23656::TaxID:2
-----------------------------------------------------------------------------------------------------------------------A-UUACGGCGG-UC-AU-AGC--G-U-G-GGGG-A-AACGC-CCG-GUC--C--CAUU-CCGAA-CCCGGA-A----GCUAAG-ACCCAC-AGCG-CCG-AUG-GU-ACU-GCACCC------GGGA--GG-GUG--UGGG--AGAGUAGG-UCA--CCGCCGG-ACAC---------------------------------------------

>Accession:M16173::SeqID:23657::TaxID:2
-----------------------------------------------------------------------------------------------------------------------G-UUACGGCGG-UC-AU-AGC--G-U-G-GGGG-A-AACGC-CCG-GUC--C--CAUU-CCGAA-CCCGGA-A----GCUAAG-ACCCAC-AGCG-CCG-AUG-GU-ACU-GCACCC------GGGA--GG-GUG--UGGG--AGAGUAGG-UCA--CCGCCGG-ACACU--------------------------------------------

>Accession:X05516::SeqID:23676::TaxID:2
-----------------------------------------------------------------------------------------------------------------------G-UUACGGCGG-UC-AU-AGC--G-A-A-GGGG-A-AACGC-CCG-GUC--C--CAUA-CCGAA-CCCGGA-A----GCUAAG-CCCUUC-AGCG-CCG-AUG-GU-ACU-GCCCUG------AAGA--CG-GGG--UGGG--AGAGUAGG-ACG--CCGCCGG-ACAAC--------------------------------------------

>Accession:X08000::SeqID:23696::TaxID:2
-----------------------------------------------------------------------------------------------------------------------A-UUACGGCGG-UC-AU-AGC--G-U-G-GGGG-A-AACGC-CCG-GUC--C--CAUU-CCGAA-CCCGGA-A----GCUAAG-ACCCAC-AGCG-CCG-AUG-GU-ACU-GCACCC------GGGA--GG-GUG--UGGG--AGAGUAGG-UCA--CCGCCGG-ACAC---------------------------------------------

>Accession:X08001::SeqID:23708::TaxID:2
-----------------------------------------------------------------------------------------------------------------------A-UUACGGCGG-UG-AU-AGC--G-U-G-GGGG-A-AACGC-CCG-GUC--C--CAUU-CCGAA-CCCGGA-A----GCUAAG-ACCCAC-AGCG-CCG-AUG-GU-ACU-GAACCC------GGGA--GG-GUG--UGGG--AGAGUAGG-UCA--CCGCCGG-ACAC---------------------------------------------

>Accession:CR555306::SeqID:28699::TaxID:2
----------------------------------------------------------------------------------------------------------------------AG-UC-UGACGA-CC-AU-AGC--G-U-C-CUGG-C-ACCAC-CCC-UUC--C--CAUC-CCGAA-CAGGAC-C----GUGAAA-CAGGAC-CGCG-CCG-AUG-AU-AGU-GCCU--------AAAC-----GGG--UGCG--AAAGUAGG-UCA--UCGUCAG-ACU----------------------------------------------

>Accession:CR555306::SeqID:28700::TaxID:2
----------------------------------------------------------------------------------------------------------------------AG-UC-UGACGA-CC-AU-AGC--G-U-C-CUGG-C-ACCAC-CCC-UUC--C--CAUC-CCGAA-CAGGAC-C----GUGAAA-CAGGAC-CGCG-CCG-AUG-AU-AGU-GCCU--------AAAC-----GGG--UGCG--AAAGUAGG-UCA--UCGUCAG-ACU----------------------------------------------

>Accession:CR555306::SeqID:28701::TaxID:2
----------------------------------------------------------------------------------------------------------------------AG-UC-UGACGA-CC-AU-AGC--G-U-C-CUGG-C-ACCAC-CCC-UUC--C--CAUC-CCGAA-CAGGAC-C----GUGAAA-CAGGAC-CGCG-CCG-AUG-AU-AGU-GCCU--------AAAC-----GGG--UGCG--AAAGUAGG-UCA--UCGUCAG-ACU----------------------------------------------

>Accession:CR555306::SeqID:28702::TaxID:2
----------------------------------------------------------------------------------------------------------------------AG-UC-UGACGA-CC-AU-AGC--G-U-C-CUGG-C-ACCAC-CCC-UUC--C--CAUC-CCGAA-CAGGAC-C----GUGAAA-CAGGAC-CGCG-CCG-AUG-AU-AGU-GCCU--------AAAC-----GGG--UGCG--AAAGUAGG-UCA--UCGUCAG-ACU----------------------------------------------

>Accession:X75615::SeqID:28787::TaxID:2
----------------------------------------------------------------------------------------------------------------------CU-AG-UGAUGA-GU-AU-GGC--A-A-A-GAG--G-UCAAC-CCG-UU---C--CAUA-CCGAA-CACGGA-A----GUUAAg-CUCUUU-AGCG-CCG-AUG-GU-AGU-UGGGGG------CUU---CC-CCC--UGUG--AGAGUAGG-ACG--UCGCUAG-G------------------------------------------------

>Accession:X01555::SeqID:28836::TaxID:2
----------------------------------------------------------------------------------------------------------------------UG-CU-UGACGA-UC-AU-AGA--G-C-G-UUGG-A-ACCAC-CUG-AUC--C--CAUC-CCGAA-CUCAGC-A----GUGAAA-CGACGC-AUCG-CCG-AUG-GU-AGU-GUGGGG------UUU---CC-CCA--UGUA--AGAGUAGG-UCA--UCGUCAG-GCGC---------------------------------------------

>Accession:X01589::SeqID:29373::TaxID:2
-------------------------------------------------------------------------------------------------------------------------UC-UGGUGA-CU-AU-AGC--G-G-A-GGGG-C-AACAC-CCG-UAC--C--CAUC-CCGAA-CACGGA-C----GUGAAG-ACCUCC-AGCG-CCG-AGA-AU-ACU-GGGAGG------GCAG--CC-UCC--UGGG--AAAGUAGG-UCG--UUGCCAG-GC-----------------------------------------------

>Accession:AF267894::SeqID:29399::TaxID:2
-------------------------------------------------------------------------------------------------------------------------UU-UGGUGA-UG-AU-GGC--A-G-A-GAGG-U-CACAC-CCG-UUC--C--CAUA-CCGAA-CACGGA-A----GUUAAG-CUCUCU-AGCG-CCG-AUG-GU-AGU-UGGGAC------CUU---GU-CCC--UGUG--AGAGUAGG-ACG--CCGCC----------------------------------------------------

>Accession:AF267895::SeqID:29400::TaxID:2
-------------------------------------------------------------------------------------------------------------------------UU-UGGUGA-UG-AU-GGC--A-G-A-GAGG-U-CACAC-CCG-UUC--C--CAUA-CCGAA-CACGGA-A----GUUAAG-CUCUCU-AGCG-CCG-AUG-GU-AGU-UGGGAC------CUU---GU-CCC--UGUG--AGAGUAGG-ACG--CCGCC----------------------------------------------------

>Accession:AF267896::SeqID:29401::TaxID:2
-------------------------------------------------------------------------------------------------------------------------UU-UGGUGA-UG-AU-GGC--A-G-A-GAGG-U-CACAC-CCG-UUC--C--CAUA-CCGAA-CACGGA-A----GUUAAG-CUCUCU-AGCG-CCG-AUG-GU-AGU-UGGGAC------CUU---GU-CCC--UGUG--AGAGUAGG-ACG--CCGCC----------------------------------------------------

>Accession:AE017334::SeqID:29496::TaxID:2
-------------------------------------------------------------------------------------------------------------------------UC-UGGUAA-UG-AU-GGC--A-G-A-GAGG-C-CACAC-CCG-UUC--C--CAUA-CCGAA-CACGGA-A----GUUAAG-CUCUCU-AGCG-CCG-AUG-GU-AGU-UGGGAC------CUU---GU-CCC--UGUG--AGAGUAGG-ACG--UUGCCAG-GC-----------------------------------------------

>Accession:AE017334::SeqID:29497::TaxID:2
-------------------------------------------------------------------------------------------------------------------------UC-UGGUAA-UG-AU-GGC--A-G-A-GAGG-C-CACAC-CCG-UUC--C--CAUA-CCGAA-CACGGA-A----GUUAAG-CUCUCU-AGCG-CCG-AUG-GU-AGU-UGGGAC------CUU---GU-CCC--UGUG--AGAGUAGG-ACG--UUGCCAG-GC-----------------------------------------------

>Accession:AE017334::SeqID:29498::TaxID:2
-------------------------------------------------------------------------------------------------------------------------UU-UGGUGA-UG-AU-GGC--A-G-A-GAGG-U-CACAC-CCG-UUC--C--CAUA-CCGAA-CACGGA-A----GUUAAG-CUCUCU-AGCG-CCG-AUG-GU-AGU-UGGGAC------CUU---GU-CCC--UGUG--AGAGUAGG-ACG--UCGCCAA-GC-----------------------------------------------

>Accession:AE017334::SeqID:29499::TaxID:2
-------------------------------------------------------------------------------------------------------------------------UU-UGGUGA-UG-AU-GGC--A-G-A-GAGG-U-CACAC-CCG-UUC--C--CAUA-CCGAA-CACGGA-A----GUUAAG-CUCUCU-AGCG-CCG-AUG-GU-AGU-UGGGAC------CUU---GU-CCC--UGUG--AGAGUAGG-ACG--UCGCCAA-GC-----------------------------------------------

>Accession:AE017334::SeqID:29500::TaxID:2
-------------------------------------------------------------------------------------------------------------------------UU-UGGUGA-UG-AU-GGC--A-G-A-GAGG-U-CACAC-CCG-UUC--C--CAUA-CCGAA-CACGGA-A----GUUAAG-CUCUCU-AGCG-CCG-AUG-GU-AGU-UGGGAC------CUU---GU-CCC--UGUG--AGAGUAGG-ACG--UCGCCAA-GC-----------------------------------------------

>Accession:AE017334::SeqID:29501::TaxID:2
-------------------------------------------------------------------------------------------------------------------------UC-UGGUAA-UG-AU-GGC--A-G-A-GAGG-U-CACAC-CCG-UUC--C--CAUA-CCGAA-CACGGA-A----GUUAAG-CUCUCU-AGCG-CCG-AUG-GU-AGU-UGGGAC------CUU---GU-CCC--UGUG--AGAGUAGG-ACG--UUGCCAG-GC-----------------------------------------------

>Accession:AE017334::SeqID:29502::TaxID:2
-------------------------------------------------------------------------------------------------------------------------UU-UGGUGA-UG-AU-GGC--A-G-A-GAGG-U-CACAC-CCG-UUC--C--CAUA-CCGAA-CACGGA-A----GUUAAG-CUCUCU-AGCG-CCG-AUG-GU-AGU-UGGGAC------CUU---GU-CCC--UGUG--AGAGUAGG-ACG--UCGCCAA-GC-----------------------------------------------

>Accession:AE017334::SeqID:29503::TaxID:2
-------------------------------------------------------------------------------------------------------------------------UU-UGGUGA-UG-AU-GGC--A-G-A-GAGG-U-CACAC-CCG-UUC--C--CAUA-CCGAA-CACGGA-A----GUUAAG-CUCUCU-AGCG-CCG-AUG-GU-AGU-UGGGAC------CUU---GU-CCC--UGUG--AGAGUAGG-ACG--UCGCCAA-GC-----------------------------------------------

>Accession:AE017334::SeqID:29504::TaxID:2
-------------------------------------------------------------------------------------------------------------------------UU-UGGUGA-UG-AU-GGC--A-G-A-GAGG-U-CACAC-CCG-UUC--C--CAUA-CCGAA-CACGGA-A----GUUAAG-CUCUCU-AGCG-CCG-AUG-GU-AGU-UGGGAC------CUU---GU-CCC--UGUG--AGAGUAGG-ACG--UCGCCAA-GC-----------------------------------------------

>Accession:AE017334::SeqID:29505::TaxID:2
-------------------------------------------------------------------------------------------------------------------------UU-UGGUGA-UG-AU-GGC--A-G-A-GAGG-U-CACAC-CCG-UUC--C--CAUA-CCGAA-CACGGA-A----GUUAAG-CUCUCU-AGCG-CCG-AUG-GU-AGU-UGGGAC------CUU---GU-CCC--UGUG--AGAGUAGG-ACG--UCGCCAA-GC-----------------------------------------------

>Accession:AE017334::SeqID:29506::TaxID:2
-------------------------------------------------------------------------------------------------------------------------UC-UGGUAA-UG-AU-GGC--A-G-A-GAGG-U-CACAC-CCG-UUC--C--CAUA-CCGAA-CACGGA-A----GUUAAG-CUCUCU-AGCG-CCG-AUG-GU-AGU-UGGGAC------CUU---GU-CCC--UGUG--AGAGUAGG-ACG--UUGCCAG-GC-----------------------------------------------

>Accession:AE017024::SeqID:29553::TaxID:2
-------------------------------------------------------------------------------------------------------------------------UU-UGGUGA-UG-AU-GGC--A-G-A-GAGG-U-CACAC-CCG-UUC--C--CAUA-CCGAA-CACGGA-A----GUUAAG-CUCUCU-AGCG-CCG-AUG-GU-AGU-UGGGAC-------CUU--GU-CCC--UGUG--AGAGUAGG-ACG--UCGCCAA-GC-----------------------------------------------

>Accession:AE017024::SeqID:29554::TaxID:2
-------------------------------------------------------------------------------------------------------------------------UU-UGGUGA-UG-AU-GGC--A-G-A-GAGG-U-CACAC-CCG-UUC--C--CAUA-CCGAA-CACGGA-A----GUUAAG-CUCUCU-AGCG-CCG-AUG-GU-AGU-UGGGAC-------CUU--GU-CCC--UGUG--AGAGUAGG-ACG--UCGCCAA-GC-----------------------------------------------

>Accession:AE017024::SeqID:29555::TaxID:2
-------------------------------------------------------------------------------------------------------------------------UU-UGGUGA-UG-AU-GGC--A-G-A-GAGG-U-CACAC-CCG-UUC--C--CAUA-CCGAA-CACGGA-A----GUUAAG-CUCUCU-AGCG-CCG-AUG-GU-AGU-UGGGAC-------CUU--GU-CCC--UGUG--AGAGUAGG-ACG--UCGCCAA-GC-----------------------------------------------

>Accession:AE017024::SeqID:29556::TaxID:2
-------------------------------------------------------------------------------------------------------------------------UC-UGGUAA-UG-AU-GGC--A-G-A-GAGG-U-CACAC-CCG-UUC--C--CAUA-CCGAA-CACGGA-A----GUUAAG-CUCUCU-AGCG-CCG-AUG-GU-AGU-UGGGAC-------CUU--GU-CCC--UGUG--AGAGUAGG-ACG--UUGCCAG-GC-----------------------------------------------

>Accession:AE017024::SeqID:29557::TaxID:2
-------------------------------------------------------------------------------------------------------------------------UU-UGGUGA-UG-AU-GGC--A-G-A-GAGG-U-CACAC-CCG-UUC--C--CAUA-CCGAA-CACGGA-A----GUUAAG-CUCUCU-AGCG-CCG-AUG-GU-AGU-UGGGAC-------CUU--GU-CCC--UGUG--AGAGUAGG-ACG--UCGCCAA-GC-----------------------------------------------

>Accession:AE017024::SeqID:29558::TaxID:2
-------------------------------------------------------------------------------------------------------------------------UU-UGGUGA-UG-AU-GGC--A-G-A-GAGG-U-CACAC-CCG-UUC--C--CAUA-CCGAA-CACGGA-A----GUUAAG-CUCUCU-AGCG-CCG-AUG-GU-AGU-UGGGAC-------CUU--GU-CCC--UGUG--AGAGUAGG-ACG--UCGCCAA-GC-----------------------------------------------

>Accession:AE017024::SeqID:29559::TaxID:2
-------------------------------------------------------------------------------------------------------------------------UU-UGGUGA-UG-AU-GGC--A-G-A-GAGG-U-CACAC-CCG-UUC--C--CAUA-CCGAA-CACGGA-A----GUUAAG-CUCUCU-AGCG-CCG-AUG-GU-AGU-UGGGAC-------CUU--GU-CCC--UGUG--AGAGUAGG-ACG--UCGCCAA-GC-----------------------------------------------

>Accession:AE017025::SeqID:29560::TaxID:2
-------------------------------------------------------------------------------------------------------------------------UU-UGGUGA-UG-AU-GGC--A-G-A-GAGG-U-CACAC-CCG-UUC--C--CAUA-CCGAA-CACGGA-A----GUUAAG-CUCUCU-AGCG-CCG-AUG-GU-AGU-UGGGAC-------CUU--GU-CCC--UGUG--AGAGUAGG-ACG--UCGCCAA-GC-----------------------------------------------

>Accession:AE017025::SeqID:29561::TaxID:2
-------------------------------------------------------------------------------------------------------------------------UC-UGGUAA-UG-AU-GGC--A-G-A-GAGG-U-CACAC-CCG-UUC--C--CAUA-CCGAA-CACGGA-A----GUUAAG-CUCUCU-AGCG-CCG-AUG-GU-AGU-UGGGAC-------CUU--GU-CCC--UGUG--AGAGUAGG-ACG--UUGCCAG-GC-----------------------------------------------

>Accession:AE017026::SeqID:29562::TaxID:2
-------------------------------------------------------------------------------------------------------------------------UC-UGGUAA-UG-AU-GGC--A-G-A-GAGG-C-CACAC-CCG-UUC--C--CAUA-CCGAA-CACGGA-A----GUUAAG-CUCUCU-AGCG-CCG-AUG-GU-AGU-UGGGAC-------CUU--GU-CCC--UGUG--AGAGUAGG-ACG--UUGCCAG-GC-----------------------------------------------

>Accession:AE017039::SeqID:29563::TaxID:2
-------------------------------------------------------------------------------------------------------------------------UC-UGGUAA-UG-AU-GGC--A-G-A-GAGG-C-CACAC-CCG-UUC--C--CAUA-CCGAA-CACGGA-A----GUUAAG-CUCUCU-AGCG-CCG-AUG-GU-AGU-UGGGAC-------CUU--GU-CCC--UGUG--AGAGUAGG-ACG--UUGCCAG-GC-----------------------------------------------

>Accession:AE016879::SeqID:29564::TaxID:2
-------------------------------------------------------------------------------------------------------------------------UC-UGGUAA-UG-AU-GGC--A-G-A-GAGG-C-CACAC-CCG-UUC--C--CAUA-CCGAA-CACGGA-A----GUUAAG-CUCUCU-AGCG-CCG-AUG-GU-AGU-UGGGAC------CUU---GU-CCC--UGUG--AGAGUAGG-ACG--UUGCCAG-GC-----------------------------------------------

>Accession:AE016879::SeqID:29565::TaxID:2
-------------------------------------------------------------------------------------------------------------------------UC-UGGUAA-UG-AU-GGC--A-G-A-GAGG-C-CACAC-CCG-UUC--C--CAUA-CCGAA-CACGGA-A----GUUAAG-CUCUCU-AGCG-CCG-AUG-GU-AGU-UGGGAC------CUU---GU-CCC--UGUG--AGAGUAGG-ACG--UUGCCAG-GC-----------------------------------------------

>Accession:AE016879::SeqID:29566::TaxID:2
-------------------------------------------------------------------------------------------------------------------------UU-UGGUGA-UG-AU-GGC--A-G-A-GAGG-U-CACAC-CCG-UUC--C--CAUA-CCGAA-CACGGA-A----GUUAAG-CUCUCU-AGCG-CCG-AUG-GU-AGU-UGGGAC------CUU---GU-CCC--UGUG--AGAGUAGG-ACG--UCGCCAA-GC-----------------------------------------------

>Accession:AE016879::SeqID:29567::TaxID:2
-------------------------------------------------------------------------------------------------------------------------UU-UGGUGA-UG-AU-GGC--A-G-A-GAGG-U-CACAC-CCG-UUC--C--CAUA-CCGAA-CACGGA-A----GUUAAG-CUCUCU-AGCG-CCG-AUG-GU-AGU-UGGGAC------CUU---GU-CCC--UGUG--AGAGUAGG-ACG--UCGCCAA-GC-----------------------------------------------

>Accession:AE016879::SeqID:29568::TaxID:2
-------------------------------------------------------------------------------------------------------------------------UU-UGGUGA-UG-AU-GGC--A-G-A-GAGG-U-CACAC-CCG-UUC--C--CAUA-CCGAA-CACGGA-A----GUUAAG-CUCUCU-AGCG-CCG-AUG-GU-AGU-UGGGAC------CUU---GU-CCC--UGUG--AGAGUAGG-ACG--UCGCCAA-GC-----------------------------------------------

>Accession:AE016879::SeqID:29569::TaxID:2
-------------------------------------------------------------------------------------------------------------------------UC-UGGUAA-UG-AU-GGC--A-G-A-GAGG-U-CACAC-CCG-UUC--C--CAUA-CCGAA-CACGGA-A----GUUAAG-CUCUCU-AGCG-CCG-AUG-GU-AGU-UGGGAC------CUU---GU-CCC--UGUG--AGAGUAGG-ACG--UUGCCAG-GC-----------------------------------------------

>Accession:AE016879::SeqID:29570::TaxID:2
-------------------------------------------------------------------------------------------------------------------------UU-UGGUGA-UG-AU-GGC--A-G-A-GAGG-U-CACAC-CCG-UUC--C--CAUA-CCGAA-CACGGA-A----GUUAAG-CUCUCU-AGCG-CCG-AUG-GU-AGU-UGGGAC------CUU---GU-CCC--UGUG--AGAGUAGG-ACG--UCGCCAA-GC-----------------------------------------------

>Accession:AE016879::SeqID:29571::TaxID:2
-------------------------------------------------------------------------------------------------------------------------UU-UGGUGA-UG-AU-GGC--A-G-A-GAGG-U-CACAC-CCG-UUC--C--CAUA-CCGAA-CACGGA-A----GUUAAG-CUCUCU-AGCG-CCG-AUG-GU-AGU-UGGGAC------CUU---GU-CCC--UGUG--AGAGUAGG-ACG--UCGCCAA-GC-----------------------------------------------

>Accession:AE016879::SeqID:29572::TaxID:2
-------------------------------------------------------------------------------------------------------------------------UU-UGGUGA-UG-AU-GGC--A-G-A-GAGG-U-CACAC-CCG-UUC--C--CAUA-CCGAA-CACGGA-A----GUUAAG-CUCUCU-AGCG-CCG-AUG-GU-AGU-UGGGAC------CUU---GU-CCC--UGUG--AGAGUAGG-ACG--UCGCCAA-GC-----------------------------------------------

>Accession:AE016879::SeqID:29573::TaxID:2
-------------------------------------------------------------------------------------------------------------------------UU-UGGUGA-UG-AU-GGC--A-G-A-GAGG-U-CACAC-CCG-UUC--C--CAUA-CCGAA-CACGGA-A----GUUAAG-CUCUCU-AGCG-CCG-AUG-GU-AGU-UGGGAC------CUU---GU-CCC--UGUG--AGAGUAGG-ACG--UCGCCAA-GC-----------------------------------------------

>Accession:AE016879::SeqID:29574::TaxID:2
-------------------------------------------------------------------------------------------------------------------------UC-UGGUAA-UG-AU-GGC--A-G-A-GAGG-U-CACAC-CCG-UUC--C--CAUA-CCGAA-CACGGA-A----GUUAAG-CUCUCU-AGCG-CCG-AUG-GU-AGU-UGGGAC------CUU---GU-CCC--UGUG--AGAGUAGG-ACG--UUGCCAG-GC-----------------------------------------------

>Accession:AE017225::SeqID:29597::TaxID:2
------------------------------------------------------------------------------------------------------------------------------GUAA-UG-AU-GGC--A-G-A-GAGG-C-CACAC-CCG-UUC--C--CAUA-CCGAA-CACGGA-A----GUUAAG-CUCUCU-AGCG-CCG-AUG-GU-AGU-UGGGAC------CUU---GU-CCC--UGUG--AGAGUAGG-ACG--UUGCCA---------------------------------------------------

>Accession:AE017225::SeqID:29598::TaxID:2
-------------------------------------------------------------------------------------------------------------------------UC-UGGUAA-UG-AU-GGC--A-G-A-GAGG-C-CACAC-CCG-UUC--C--CAUA-CCGAA-CACGGA-A----GUUAAG-CUCUCU-AGCG-CCG-AUG-GU-AGU-UGGGAC------CUU---GU-CCC--UGUG--AGAGUAGG-ACG--UUGCCAG-GCAAA--------------------------------------------

>Accession:AE017225::SeqID:29599::TaxID:2
-------------------------------------------------------------------------------------------------------------------------UU-UGGUGA-UG-AU-GGC--A-G-A-GAGG-U-CACAC-CCG-UUC--C--CAUA-CCGAA-CACGGA-A----GUUAAG-CUCUCU-AGCG-CCG-AUG-GU-AGU-UGGGAC------CUU---GU-CCC--UGUG--AGAGUAGG-ACG--UCGCCAA-GCAAC--------------------------------------------

>Accession:AE017225::SeqID:29600::TaxID:2
-------------------------------------------------------------------------------------------------------------------------UU-UGGUGA-UG-AU-GGC--A-G-A-GAGG-U-CACAC-CCG-UUC--C--CAUA-CCGAA-CACGGA-A----GUUAAG-CUCUCU-AGCG-CCG-AUG-GU-AGU-UGGGAC------CUU---GU-CCC--UGUG--AGAGUAGG-ACG--UCGCCAA-GCAAC--------------------------------------------

>Accession:AE017225::SeqID:29601::TaxID:2
-------------------------------------------------------------------------------------------------------------------------UU-UGGUGA-UG-AU-GGC--A-G-A-GAGG-U-CACAC-CCG-UUC--C--CAUA-CCGAA-CACGGA-A----GUUAAG-CUCUCU-AGCG-CCG-AUG-GU-AGU-UGGGAC------CUU---GU-CCC--UGUG--AGAGUAGG-ACG--UCGCCAA-GCAAC--------------------------------------------

>Accession:AE017225::SeqID:29602::TaxID:2
-------------------------------------------------------------------------------------------------------------------------UC-UGGUAA-UG-AU-GGC--A-G-A-GAGG-U-CACAC-CCG-UUC--C--CAUA-CCGAA-CACGGA-A----GUUAAG-CUCUCU-AGCG-CCG-AUG-GU-AGU-UGGGAC------CUU---GU-CCC--UGUG--AGAGUAGG-ACG--UUGCCAG-GCUAA--------------------------------------------

>Accession:AE017225::SeqID:29603::TaxID:2
-------------------------------------------------------------------------------------------------------------------------UU-UGGUGA-UG-AU-GGC--A-G-A-GAGG-U-CACAC-CCG-UUC--C--CAUA-CCGAA-CACGGA-A----GUUAAG-CUCUCU-AGCG-CCG-AUG-GU-AGU-UGGGAC------CUU---GU-CCC--UGUG--AGAGUAGG-ACG--UCGCCAA-GCUAU--------------------------------------------

>Accession:AE017225::SeqID:29604::TaxID:2
-------------------------------------------------------------------------------------------------------------------------UU-UGGUGA-UG-AU-GGC--A-G-A-GAGG-U-CACAC-CCG-UUC--C--CAUA-CCGAA-CACGGA-A----GUUAAG-CUCUCU-AGCG-CCG-AUG-GU-AGU-UGGGAC------CUU---GU-CCC--UGUG--AGAGUAGG-ACG--UCGCCAA-GCAAG--------------------------------------------

>Accession:AE017225::SeqID:29605::TaxID:2
-------------------------------------------------------------------------------------------------------------------------UU-UGGUGA-UG-AU-GGC--A-G-A-GAGG-U-CACAC-CCG-UUC--C--CAUA-CCGAA-CACGGA-A----GUUAAG-CUCUCU-AGCG-CCG-AUG-GU-AGU-UGGGAC------CUU---GU-CCC--UGUG--AGAGUAGG-ACG--UCGCCAA-GCAAC--------------------------------------------

>Accession:AE017225::SeqID:29606::TaxID:2
-------------------------------------------------------------------------------------------------------------------------UU-UGGUGA-UG-AU-GGC--A-G-A-GAGG-U-CACAC-CCG-UUC--C--CAUA-CCGAA-CACGGA-A----GUUAAG-CUCUCU-AGCG-CCG-AUG-GU-AGU-UGGGAC------CUU---GU-CCC--UGUG--AGAGUAGG-ACG--UCGCCAA-GCAAA--------------------------------------------

>Accession:AE017225::SeqID:29607::TaxID:2
-------------------------------------------------------------------------------------------------------------------------UC-UGGUAA-UG-AU-GGC--A-G-A-GAGG-U-CACAC-CCG-UUC--C--CAUA-CCGAA-CACGGA-A----GUUAAG-CUCUCU-AGCG-CCG-AUG-GU-AGU-UGGGAC------CUU---GU-CCC--UGUG--AGAGUAGG-ACG--UUGCCAG-GCAAU--------------------------------------------

>Accession:AF267886::SeqID:29742::TaxID:2
-------------------------------------------------------------------------------------------------------------------------UU-UGGUGA-UG-AU-GGC--A-G-A-GAGG-U-CACAC-CCG-UUC--C--CAUA-CCGAA-CACGGA-A----GUUAAG-CUCUCU-AGCG-CCG-AUG-GU-AGU-UGGGAC------CUU---GU-CCC--UGUG--AGAGUAGG-ACG--CCGCC----------------------------------------------------

>Accession:AF267892::SeqID:29743::TaxID:2
-------------------------------------------------------------------------------------------------------------------------UU-UGGUGA-UG-AU-GGC--A-G-A-GAGG-U-CACAC-CCG-UUC--C--CAUA-CCGAA-CACGGA-A----GUUAAG-CUCUCU-AGCG-CCG-AUG-GU-AGU-UGGGAC------CUU---GU-CCC--UGUG--AGAGUAGG-ACG--CCGCC----------------------------------------------------

>Accession:AF267893::SeqID:29744::TaxID:2
-------------------------------------------------------------------------------------------------------------------------UU-UGGUGA-UG-AU-GGC--A-G-A-GAGG-U-CACAC-CCG-UUC--C--CAUA-CCGAA-CACGGA-A----GUUAAG-CUCUCU-AGCG-CCG-AUG-GU-AGU-UGGGAC------CUU---GU-CCC--UGUG--AGAGUAGG-ACG--CCGCC----------------------------------------------------

>Accession:AY224379::SeqID:29745::TaxID:2
-------------------------------------------------------------------------------------------------------------------------UU-UGGUGA-UG-AU-GGC--A-G-A-GAGG-U-CACAC-CCG-UUC--C--CAUA-CCGAA-CACGGA-A----GUUAAG-CUCUCU-AGCG-CCG-AUG-GU-AGU-UGGGAC------CUU---GU-CCC--UGUG--AGAGUAGG-ACG--UCGCCAA-GC-----------------------------------------------

>Accession:AY224380::SeqID:29746::TaxID:2
-------------------------------------------------------------------------------------------------------------------------UU-UGGUGA-UG-AU-GGC--A-G-A-GAGG-U-CACAC-CCG-UUC--C--CAUA-CCGAA-CACGGA-A----GUUAAG-CUCUCU-AGCG-CCG-AUG-GU-AGU-UGGGAC------CUU---GU-CCC--UGUG--AGAGUAGG-ACG--UCGCCAA-GC-----------------------------------------------

>Accession:AY224381::SeqID:29747::TaxID:2
-------------------------------------------------------------------------------------------------------------------------UC-UGGUAA-UG-AU-GGC--A-G-A-GAGG-U-CACAC-CCG-UUC--C--CAUA-CCGAA-CACGGA-A----GUUAAG-CUCUCU-AGCG-CCG-AUG-GU-AGU-UGGGAC------CUU---GU-CCC--UGUG--AGAGUAGG-ACG--UUGCCAG-GC-----------------------------------------------

>Accession:AY224381::SeqID:29748::TaxID:2
-------------------------------------------------------------------------------------------------------------------------UU-UGGUGA-UG-AU-GGC--A-G-A-GAGG-U-CACAC-CCG-UUC--C--CAUA-CCGAA-CACGGA-A----GUUAAG-CUCUCU-AGCG-CCG-AUG-GU-AGU-UGGGAC------CUU---GU-CCC--UGUG--AGAGUAGG-ACG--UCGCCAA-GC-----------------------------------------------

>Accession:AY224382::SeqID:29749::TaxID:2
-------------------------------------------------------------------------------------------------------------------------UC-UGGUAA-UG-AU-GGC--A-G-A-GAGG-U-CACAC-CCG-UUC--C--CAUA-CCGAA-CACGGA-A----GUUAAG-CUCUCU-AGCG-CCG-AUG-GU-AGU-UGGGAC------CUU---GU-CCC--UGUG--AGAGUAGG-ACG--UUGCCAG-GC-----------------------------------------------

>Accession:AY224383::SeqID:29750::TaxID:2
-------------------------------------------------------------------------------------------------------------------------UU-UGGUGA-UG-AU-GGC--A-G-A-GAGG-U-CACAC-CCG-UUC--C--CAUA-CCGAA-CACGGA-A----GUUAAG-CUCUCU-AGCG-CCG-AUG-GU-AGU-UGGGAC------CUU---GU-CCC--UGUG--AGAGUAGG-ACG--UCGCCAA-GC-----------------------------------------------

>Accession:AY224384::SeqID:29751::TaxID:2
-------------------------------------------------------------------------------------------------------------------------UU-UGGUGA-UG-AU-GGC--A-G-A-GAGG-U-CACAC-CCG-UUC--C--CAUA-CCGAA-CACGGA-A----GUUAAG-CUCUCU-AGCG-CCG-AUG-GU-AGU-UGGGAC------CUU---GU-CCC--UGUG--AGAGUAGG-ACG--UCGCCAA-GC-----------------------------------------------

>Accession:AY224384::SeqID:29752::TaxID:2
-------------------------------------------------------------------------------------------------------------------------UU-UGGUGA-UG-AU-GGC--A-G-A-GAGG-U-CACAC-CCG-UUC--C--CAUA-CCGAA-CACGGA-A----GUUAAG-CUCUCU-AGCG-CCG-AUG-GU-AGU-UGGGAC------CUU---GU-CCC--UGUG--AGAGUAGG-ACG--UCGCCAA-GC-----------------------------------------------

>Accession:AY224385::SeqID:29753::TaxID:2
-------------------------------------------------------------------------------------------------------------------------UU-UGGUGA-UG-AU-GGC--A-G-A-GAGG-U-CACAC-CCG-UUC--C--CAUA-CCGAA-CACGGA-A----GUUAAG-CUCUCU-AGCG-CCG-AUG-GU-AGU-UGGGAC------CUU---GU-CCC--UGUG--AGAGUAGG-ACG--UCGCCAA-GC-----------------------------------------------

>Accession:AY224385::SeqID:29754::TaxID:2
-------------------------------------------------------------------------------------------------------------------------UU-UGGUGA-UG-AU-GGC--A-G-A-GAGG-U-CACAC-CCG-UUC--C--CAUA-CCGAA-CACGGA-A----GUUAAG-CUCUCU-AGCG-CCG-AUG-GU-AGU-UGGGAC------CUU---GU-CCC--UGUG--AGAGUAGG-ACG--UCGCCAA-GC-----------------------------------------------

>Accession:AY224386::SeqID:29755::TaxID:2
-------------------------------------------------------------------------------------------------------------------------UC-UGGUAA-UG-AU-GGC--A-G-A-GAGG-U-CACAC-CCG-UUC--C--CAUA-CCGAA-CACGGA-A----GUUAAG-CUCUCU-AGCG-CCG-AUG-GU-AGU-UGGGAC------CUU---GU-CCC--UGUG--AGAGUAGG-ACG--UUGCCAG-GC-----------------------------------------------

>Accession:AY224387::SeqID:29756::TaxID:2
-------------------------------------------------------------------------------------------------------------------------UC-UGGUAA-UG-AU-GGC--A-G-A-GAGG-U-CACAC-CCG-UUC--C--CAUA-CCGAA-CACGGA-A----GUUAAG-CUCUCU-AGCG-CCG-AUG-GU-AGU-UGGGAC------CUU---GU-CCC--UGUG--AGAGUAGG-ACG--UUGCCAG-GC-----------------------------------------------

>Accession:AY224388::SeqID:29757::TaxID:2
-------------------------------------------------------------------------------------------------------------------------UC-UGGUAA-UG-AU-GGC--A-G-A-GAGG-U-CACAC-CCG-UUC--C--CAUA-CCGAA-CACGGA-A----GUUAAG-CUCUCU-AGCG-CCG-AUG-GU-AGU-UGGGAC------CUU---GU-CCC--UGUG--AGAGUAGG-ACG--UUGCCAG-GC-----------------------------------------------

>Accession:AE017194::SeqID:30053::TaxID:2
----------------------------------------------------------------------------------------------------------------------------UGGUAA-UG-AU-GGC--A-G-A-GAGG-U-CACAC-CCG-UUC--C--CAUA-CCGAA-CACGGA-A----GUUAAG-CUCUCU-AGCG-CCG-AUG-GU-AGU-UGGGAC------CUU---GU-CCC--UGUG--AGAGUAGG-ACG--UUGCCA---------------------------------------------------

>Accession:AE017194::SeqID:30054::TaxID:2
----------------------------------------------------------------------------------------------------------------------------UGGUAA-UG-AU-GGC--A-G-A-GAGG-U-CACAC-CCG-UUC--C--CAUA-CCGAA-CACGGA-A----GUUAAG-CUCUCU-AGCG-CCG-AUG-GU-AGU-UGGGAC------CUU---GU-CCC--UGUG--AGAGUAGG-ACG--UUGCCA---------------------------------------------------

>Accession:AE017194::SeqID:30055::TaxID:2
----------------------------------------------------------------------------------------------------------------------------UGGUAA-UG-AU-GGC--A-G-A-GAGG-U-CACAC-CCG-UUC--C--CAUA-CCGAA-CACGGA-A----GUUAAG-CUCUCU-AGCG-CCG-AUG-GU-AGU-UGGGAC------CUU---GU-CCC--UGUG--AGAGUAGG-ACG--UUGCCA---------------------------------------------------

>Accession:AE017264::SeqID:30056::TaxID:2
----------------------------------------------------------------------------------------------------------------------------UGGUAA-UG-AU-GGC--A-G-A-GAGG-U-CACAC-CCG-UUC--C--CAUA-CCGAA-CACGGA-A----GUUAAG-CUCUCU-AGCG-CCG-AUG-GU-AGU-UGGGAC------CUU---GU-CCC--UGUG--AGAGUAGG-ACG--UUGCCA---------------------------------------------------

>Accession:AE017266::SeqID:30057::TaxID:2
----------------------------------------------------------------------------------------------------------------------------UGGUAA-UG-AU-GGC--A-G-A-GAGG-U-CACAC-CCG-UUC--C--CAUA-CCGAA-CACGGA-A----GUUAAG-CUCUCU-AGCG-CCG-AUG-GU-AGU-UGGGAC------CUU---GU-CCC--UGUG--AGAGUAGG-ACG--UUGCCA---------------------------------------------------

>Accession:AE017266::SeqID:30058::TaxID:2
----------------------------------------------------------------------------------------------------------------------------UGGUAA-UG-AU-GGC--A-G-A-GAGG-U-CACAC-CCG-UUC--C--CAUA-CCGAA-CACGGA-A----GUUAAG-CUCUCU-AGCG-CCG-AUG-GU-AGU-UGGGAC------CUU---GU-CCC--UGUG--AGAGUAGG-ACG--UUGCCA---------------------------------------------------

>Accession:AE017194::SeqID:30059::TaxID:2
-------------------------------------------------------------------------------------------------------------------------UU-UGGUGA-UG-AU-GGC--A-G-A-GAGG-U-CACAC-CCG-UUC--C--CAUA-CCGAA-CACGGA-A----GUUAAG-CUCUCU-AGCG-CCG-AUG-GU-AGU-UGGGAC------CUU---GU-CCC--UGUG--AGAGUAGG-ACG--UCGCCAA-GC-----------------------------------------------

>Accession:AE017194::SeqID:30060::TaxID:2
-------------------------------------------------------------------------------------------------------------------------UU-UGGUGA-UG-AU-GGC--A-G-A-GAGG-U-CACAC-CCG-UUC--C--CAUA-CCGAA-CACGGA-A----GUUAAG-CUCUCU-AGCG-CCG-AUG-GU-AGU-UGGGAC------CUU---GU-CCC--UGUG--AGAGUAGG-ACG--UCGCCAA-GC-----------------------------------------------

>Accession:AE017194::SeqID:30061::TaxID:2
-------------------------------------------------------------------------------------------------------------------------UU-UGGUGA-UG-AU-GGC--A-G-A-GAGG-U-CACAC-CCG-UUC--C--CAUA-CCGAA-CACGGA-A----GUUAAG-CUCUCU-AGCG-CCG-AUG-GU-AGU-UGGGAC------CUU---GU-CCC--UGUG--AGAGUAGG-ACG--UCGCCAA-GC-----------------------------------------------

>Accession:AE017194::SeqID:30062::TaxID:2
-------------------------------------------------------------------------------------------------------------------------UU-UGGUGA-UG-AU-GGC--A-G-A-GAGG-U-CACAC-CCG-UUC--C--CAUA-CCGAA-CACGGA-A----GUUAAG-CUCUCU-AGCG-CCG-AUG-GU-AGU-UGGGAC------CUU---GU-CCC--UGUG--AGAGUAGG-ACG--UCGCCAA-GC-----------------------------------------------

>Accession:AE017194::SeqID:30063::TaxID:2
-------------------------------------------------------------------------------------------------------------------------UU-UGGUGA-UG-AU-GGC--A-G-A-GAGG-U-CACAC-CCG-UUC--C--CAUA-CCGAA-CACGGA-A----GUUAAG-CUCUCU-AGCG-CCG-AUG-GU-AGU-UGGGAC------CUU---GU-CCC--UGUG--AGAGUAGG-ACG--UCGCCAA-GC-----------------------------------------------

>Accession:AE017194::SeqID:30064::TaxID:2
-------------------------------------------------------------------------------------------------------------------------UU-UGGUGA-UG-AU-GGC--A-G-A-GAGG-U-CACAC-CCG-UUC--C--CAUA-CCGAA-CACGGA-A----GUUAAG-CUCUCU-AGCG-CCG-AUG-GU-AGU-UGGGAC------CUU---GU-CCC--UGUG--AGAGUAGG-ACG--UCGCCAA-GC-----------------------------------------------

>Accession:AE017194::SeqID:30065::TaxID:2
-------------------------------------------------------------------------------------------------------------------------UU-UGGUGA-UG-AU-GGC--A-G-A-GAGG-U-CACAC-CCG-UUC--C--CAUA-CCGAA-CACGGA-A----GUUAAG-CUCUCU-AGCG-CCG-AUG-GU-AGU-UGGGAC------CUU---GU-CCC--UGUG--AGAGUAGG-ACG--UCGCCAA-GC-----------------------------------------------

>Accession:AE017194::SeqID:30066::TaxID:2
-------------------------------------------------------------------------------------------------------------------------UU-UGGUGA-UG-AU-GGC--A-G-A-GAGG-U-CACAC-CCG-UUC--C--CAUA-CCGAA-CACGGA-A----GUUAAG-CUCUCU-AGCG-CCG-AUG-GU-AGU-UGGGAC------CUU---GU-CCC--UGUG--AGAGUAGG-ACG--UCGCCAA-GC-----------------------------------------------

>Accession:AE017264::SeqID:30067::TaxID:2
-------------------------------------------------------------------------------------------------------------------------UU-UGGUGA-UG-AU-GGC--A-G-A-GAGG-U-CACAC-CCG-UUC--C--CAUA-CCGAA-CACGGA-A----GUUAAG-CUCUCU-AGCG-CCG-AUG-GU-AGU-UGGGAC------CUU---GU-CCC--UGUG--AGAGUAGG-ACG--UCGCCAA-GC-----------------------------------------------

>Accession:AE017264::SeqID:30068::TaxID:2
-------------------------------------------------------------------------------------------------------------------------UU-UGGUGA-UG-AU-GGC--A-G-A-GAGG-U-CACAC-CCG-UUC--C--CAUA-CCGAA-CACGGA-A----GUUAAG-CUCUCU-AGCG-CCG-AUG-GU-AGU-UGGGAC------CUU---GU-CCC--UGUG--AGAGUAGG-ACG--UCGCCAA-GC-----------------------------------------------

>Accession:AE017264::SeqID:30069::TaxID:2
-------------------------------------------------------------------------------------------------------------------------UU-UGGUGA-UG-AU-GGC--A-G-A-GAGG-U-CACAC-CCG-UUC--C--CAUA-CCGAA-CACGGA-A----GUUAAG-CUCUCU-AGCG-CCG-AUG-GU-AGU-UGGGAC------CUU---GU-CCC--UGUG--AGAGUAGG-ACG--UCGCCAA-GC-----------------------------------------------

>Accession:AE017264::SeqID:30070::TaxID:2
-------------------------------------------------------------------------------------------------------------------------UU-UGGUGA-UG-AU-GGC--A-G-A-GAGG-U-CACAC-CCG-UUC--C--CAUA-CCGAA-CACGGA-A----GUUAAG-CUCUCU-AGCG-CCG-AUG-GU-AGU-UGGGAC------CUU---GU-CCC--UGUG--AGAGUAGG-ACG--UCGCCAA-GC-----------------------------------------------

>Accession:AE017265::SeqID:30071::TaxID:2
-------------------------------------------------------------------------------------------------------------------------UU-UGGUGA-UG-AU-GGC--A-G-A-GAGG-U-CACAC-CCG-UUC--C--CAUA-CCGAA-CACGGA-A----GUUAAG-CUCUCU-AGCG-CCG-AUG-GU-AGU-UGGGAC------CUU---GU-CCC--UGUG--AGAGUAGG-ACG--UCGCCAA-GC-----------------------------------------------

>Accession:AE017265::SeqID:30072::TaxID:2
-------------------------------------------------------------------------------------------------------------------------UU-UGGUGA-UG-AU-GGC--A-G-A-GAGG-U-CACAC-CCG-UUC--C--CAUA-CCGAA-CACGGA-A----GUUAAG-CUCUCU-AGCG-CCG-AUG-GU-AGU-UGGGAC------CUU---GU-CCC--UGUG--AGAGUAGG-ACG--UCGCCAA-GC-----------------------------------------------

>Accession:AE017265::SeqID:30073::TaxID:2
-------------------------------------------------------------------------------------------------------------------------UU-UGGUGA-UG-AU-GGC--A-G-A-GAGG-U-CACAC-CCG-UUC--C--CAUA-CCGAA-CACGGA-A----GUUAAG-CUCUCU-AGCG-CCG-AUG-GU-AGU-UGGGAC------CUU---GU-CCC--UGUG--AGAGUAGG-ACG--UCGCCAA-GC-----------------------------------------------

>Accession:AE017265::SeqID:30074::TaxID:2
-------------------------------------------------------------------------------------------------------------------------UU-UGGUGA-UG-AU-GGC--A-G-A-GAGG-U-CACAC-CCG-UUC--C--CAUA-CCGAA-CACGGA-A----GUUAAG-CUCUCU-AGCG-CCG-AUG-GU-AGU-UGGGAC------CUU---GU-CCC--UGUG--AGAGUAGG-ACG--UCGCCAA-GC-----------------------------------------------

>Accession:AE016998::SeqID:30150::TaxID:2
-------------------------------------------------------------------------------------------------------------------------UU-UGGUGA-UG-AU-GGC--A-G-A-GAGG-U-CACAC-CCG-UUC--C--CAUA-CCGAA-CACGGA-A----GUUAAG-CUCUCU-AGCG-CCG-AUG-GU-AGU-UGGGAC------CUU---GU-CCC--UGUG--AGAGUAGG-ACG--UCGCCAA-G------------------------------------------------

>Accession:AE016998::SeqID:30151::TaxID:2
-------------------------------------------------------------------------------------------------------------------------UU-UGGUGA-UG-AU-GGC--A-G-A-GAGG-U-CACAC-CCG-UUC--C--CAUA-CCGAA-CACGGA-A----GUUAAG-CUCUCU-AGCG-CCG-AUG-GU-AGU-UGGGAC------CUU---GU-CCC--UGUG--AGAGUAGG-ACG--UCGCCAA-G------------------------------------------------

>Accession:AE016998::SeqID:30152::TaxID:2
-------------------------------------------------------------------------------------------------------------------------UU-UGGUGA-UG-AU-GGC--A-G-A-GAGG-U-CACAC-CCG-UUC--C--CAUA-CCGAA-CACGGA-A----GUUAAG-CUCUCU-AGCG-CCG-AUG-GU-AGU-UGGGAC------CUU---GU-CCC--UGUG--AGAGUAGG-ACG--UCGCCAA-G------------------------------------------------

>Accession:AE016998::SeqID:30153::TaxID:2
-------------------------------------------------------------------------------------------------------------------------UU-UGGUGA-UG-AU-GGC--A-G-A-GAGG-U-CACAC-CCG-UUC--C--CAUA-CCGAA-CACGGA-A----GUUAAG-CUCUCU-AGCG-CCG-AUG-GU-AGU-UGGGAC------CUU---GU-CCC--UGUG--AGAGUAGG-ACG--UCGCCAA-G------------------------------------------------

>Accession:AE016998::SeqID:30154::TaxID:2
-------------------------------------------------------------------------------------------------------------------------UU-UGGUGA-UG-AU-GGC--A-G-A-GAGG-U-CACAC-CCG-UUC--C--CAUA-CCGAA-CACGGA-A----GUUAAG-CUCUCU-AGCG-CCG-AUG-GU-AGU-UGGGAC------CUU---GU-CCC--UGUG--AGAGUAGG-ACG--UCGCCAA-G------------------------------------------------

>Accession:AE016998::SeqID:30155::TaxID:2
-------------------------------------------------------------------------------------------------------------------------UU-UGGUGA-UG-AU-GGC--A-G-A-GAGG-U-CACAC-CCG-UUC--C--CAUA-CCGAA-CACGGA-A----GUUAAG-CUCUCU-AGCG-CCG-AUG-GU-AGU-UGGGAC------CUU---GU-CCC--UGUG--AGAGUAGG-ACG--UCGCCAA-G------------------------------------------------

>Accession:AE016998::SeqID:30156::TaxID:2
-------------------------------------------------------------------------------------------------------------------------UU-UGGUGA-UG-AU-GGC--A-G-A-GAGG-U-CACAC-CCG-UUC--C--CAUA-CCGAA-CACGGA-A----GUUAAG-CUCUCU-AGCG-CCG-AUG-GU-AGU-UGGGAC------CUU---GU-CCC--UGUG--AGAGUAGG-ACG--UCGCCAA-G------------------------------------------------

>Accession:AE016998::SeqID:30157::TaxID:2
-------------------------------------------------------------------------------------------------------------------------UU-UGGUGA-UG-AU-GGC--A-G-A-GAGG-U-CACAC-CCG-UUC--C--CAUA-CCGAA-CACGGA-A----GUUAAG-CUCUCU-AGCG-CCG-AUG-GU-AGU-UGGGAC------CUU---GU-CCC--UGUG--AGAGUAGG-ACG--UCGCCAA-G------------------------------------------------

>Accession:AE016877::SeqID:30158::TaxID:2
-------------------------------------------------------------------------------------------------------------------------UU-UGGUGA-UG-AU-GGC--A-G-A-GAGG-U-CACAC-CCG-UUC--C--CAUA-CCGAA-CACGGA-A----GUUAAG-CUCUCU-AGCG-CCG-AUG-GU-AGU-UGGGAC------CUU---GU-CCC--UGUG--AGAGUAGG-ACG--UCGCCAA-G------------------------------------------------

>Accession:AE016877::SeqID:30159::TaxID:2
-------------------------------------------------------------------------------------------------------------------------UU-UGGUGA-UG-AU-GGC--A-G-A-GAGG-U-CACAC-CCG-UUC--C--CAUA-CCGAA-CACGGA-A----GUUAAG-CUCUCU-AGCG-CCG-AUG-GU-AGU-UGGGAC------CUU---GU-CCC--UGUG--AGAGUAGG-ACG--UCGCCAA-G------------------------------------------------

>Accession:AE016877::SeqID:30160::TaxID:2
-------------------------------------------------------------------------------------------------------------------------UU-UGGUGA-UG-AU-GGC--A-G-A-GAGG-U-CACAC-CCG-UUC--C--CAUA-CCGAA-CACGGA-A----GUUAAG-CUCUCU-AGCG-CCG-AUG-GU-AGU-UGGGAC------CUU---GU-CCC--UGUG--AGAGUAGG-ACG--UCGCCAA-G------------------------------------------------

>Accession:AE016877::SeqID:30161::TaxID:2
-------------------------------------------------------------------------------------------------------------------------UU-UGGUGA-UG-AU-GGC--A-G-A-GAGG-U-CACAC-CCG-UUC--C--CAUA-CCGAA-CACGGA-A----GUUAAG-CUCUCU-AGCG-CCG-AUG-GU-AGU-UGGGAC------CUU---GU-CCC--UGUG--AGAGUAGG-ACG--UCGCCAA-G------------------------------------------------

>Accession:AE016877::SeqID:30162::TaxID:2
-------------------------------------------------------------------------------------------------------------------------UU-UGGUGA-UG-AU-GGC--A-G-A-GAGG-U-CACAC-CCG-UUC--C--CAUA-CCGAA-CACGGA-A----GUUAAG-CUCUCU-AGCG-CCG-AUG-GU-AGU-UGGGAC------CUU---GU-CCC--UGUG--AGAGUAGG-ACG--UCGCCAA-G------------------------------------------------

>Accession:AE016877::SeqID:30163::TaxID:2
-------------------------------------------------------------------------------------------------------------------------UU-UGGUGA-UG-AU-GGC--A-G-A-GAGG-U-CACAC-CCG-UUC--C--CAUA-CCGAA-CACGGA-A----GUUAAG-CUCUCU-AGCG-CCG-AUG-GU-AGU-UGGGAC------CUU---GU-CCC--UGUG--AGAGUAGG-ACG--UCGCCAA-G------------------------------------------------

>Accession:AE016877::SeqID:30164::TaxID:2
-------------------------------------------------------------------------------------------------------------------------UU-UGGUGA-UG-AU-GGC--A-G-A-GAGG-U-CACAC-CCG-UUC--C--CAUA-CCGAA-CACGGA-A----GUUAAG-CUCUCU-AGCG-CCG-AUG-GU-AGU-UGGGAC------CUU---GU-CCC--UGUG--AGAGUAGG-ACG--UCGCCAA-G------------------------------------------------

>Accession:AE016877::SeqID:30165::TaxID:2
-------------------------------------------------------------------------------------------------------------------------UU-UGGUGA-UG-AU-GGC--A-G-A-GAGG-U-CACAC-CCG-UUC--C--CAUA-CCGAA-CACGGA-A----GUUAAG-CUCUCU-AGCG-CCG-AUG-GU-AGU-UGGGAC------CUU---GU-CCC--UGUG--AGAGUAGG-ACG--UCGCCAA-G------------------------------------------------

>Accession:CP000001::SeqID:30192::TaxID:2
----------------------------------------------------------------------------------------------------------------------------UGGUAA-UG-AU-GGC--A-G-A-GAGG-U-CACAC-CCG-UUC--C--CAUA-CCGAA-CACGGA-A----GUUAAG-CUCUCU-AGCG-CCG-AUG-GU-AGU-UGGGAC------CUU---GU-CCC--UGUG--AGAGUAGG-ACG--UUGCCAG-GC-----------------------------------------------

>Accession:CP000001::SeqID:30193::TaxID:2
----------------------------------------------------------------------------------------------------------------------------UGGUAA-UG-AU-GGC--A-G-A-GAGG-U-CACAC-CCG-UUC--C--CAUA-CCGAA-CACGGA-A----GUUAAG-CUCUCU-AGCG-CCG-AUG-GU-AGU-UGGGAC------CUU---GU-CCC--UGUG--AGAGUAGG-ACG--UUGCCAG-GC-----------------------------------------------

>Accession:CP000001::SeqID:30194::TaxID:2
----------------------------------------------------------------------------------------------------------------------------UGGUAA-UG-AU-GGC--A-G-A-GAGG-U-CACAC-CCG-UUC--C--CAUA-CCGAA-CACGGA-A----GUUAAG-CUCUCU-AGCG-CCG-AUG-GU-AGU-UGGGAC------CUU---GU-CCC--UGUG--AGAGUAGG-ACG--UUGCCAG-GC-----------------------------------------------

>Accession:CP000001::SeqID:30195::TaxID:2
--------------------------------------------------------------------------------------------------------------------------C-UGGUAA-UG-AU-GGC--A-G-A-GAGG-U-CACAC-CCG-UUC--C--CAUA-CCGAA-CACGGA-A----GUUAAG-CUCUCU-AGCG-CCG-AUG-GU-AGU-UGGGAC------CUU---GU-CCC--UGUG--AGAGUAGG-ACG--UUGCCAG-GCA----------------------------------------------

>Accession:CP000001::SeqID:30196::TaxID:2
--------------------------------------------------------------------------------------------------------------------------U-UGGUGA-UG-AU-GGC--A-G-A-GAGG-U-CACAC-CCG-UUC--C--CAUA-CCGAA-CACGGA-A----GUUAAG-CUCUCU-AGCG-CCG-AUG-GU-AGU-UGGGAC------CUU---GU-CCC--UGUG--AGAGUAGG-ACG--UCGCCAA-GCAAA--------------------------------------------

>Accession:CP000001::SeqID:30197::TaxID:2
--------------------------------------------------------------------------------------------------------------------------U-UGGUGA-UG-AU-GGC--A-G-A-GAGG-U-CACAC-CCG-UUC--C--CAUA-CCGAA-CACGGA-A----GUUAAG-CUCUCU-AGCG-CCG-AUG-GU-AGU-UGGGAC------CUU---GU-CCC--UGUG--AGAGUAGG-ACG--UCGCCAA-GCAAC--------------------------------------------

>Accession:CP000001::SeqID:30198::TaxID:2
--------------------------------------------------------------------------------------------------------------------------U-UGGUGA-UG-AU-GGC--A-G-A-GAGG-U-CACAC-CCG-UUC--C--CAUA-CCGAA-CACGGA-A----GUUAAG-CUCUCU-AGCG-CCG-AUG-GU-AGU-UGGGAC------CUU---GU-CCC--UGUG--AGAGUAGG-ACG--UCGCCAA-GCAAC--------------------------------------------

>Accession:CP000001::SeqID:30199::TaxID:2
--------------------------------------------------------------------------------------------------------------------------U-UGGUGA-UG-AU-GGC--A-G-A-GAGG-U-CACAC-CCG-UUC--C--CAUA-CCGAA-CACGGA-A----GUUAAG-CUCUCU-AGCG-CCG-AUG-GU-AGU-UGGGAC------CUU---GU-CCC--UGUG--AGAGUAGG-ACG--UCGCCAA-GCAAC--------------------------------------------

>Accession:CP000001::SeqID:30200::TaxID:2
--------------------------------------------------------------------------------------------------------------------------U-UGGUGA-UG-AU-GGC--A-G-A-GAGG-U-CACAC-CCG-UUC--C--CAUA-CCGAA-CACGGA-A----GUUAAG-CUCUCU-AGCG-CCG-AUG-GU-AGU-UGGGAC------CUU---GU-CCC--UGUG--AGAGUAGG-ACG--UCGCCAA-GCUAU--------------------------------------------

>Accession:CP000001::SeqID:30201::TaxID:2
--------------------------------------------------------------------------------------------------------------------------U-UGGUGA-UG-AU-GGC--A-G-A-GAGG-U-CACAC-CCG-UUC--C--CAUA-CCGAA-CACGGA-A----GUUAAG-CUCUCU-AGCG-CCG-AUG-GU-AGU-UGGGAC------CUU---GU-CCC--UGUG--AGAGUAGG-ACG--UCGCCAA-GCAAG--------------------------------------------

>Accession:CP000001::SeqID:30202::TaxID:2
--------------------------------------------------------------------------------------------------------------------------U-UGGUGA-UG-AU-GGC--A-G-A-GAGG-U-CACAC-CCG-UUC--C--CAUA-CCGAA-CACGGA-A----GUUAAG-CUCUCU-AGCG-CCG-AUG-GU-AGU-UGGGAC------CUU---GU-CCC--UGUG--AGAGUAGG-ACG--UCGCCAA-GCAAC--------------------------------------------

>Accession:CP000001::SeqID:30203::TaxID:2
--------------------------------------------------------------------------------------------------------------------------U-UGGUGA-UG-AU-GGC--A-G-A-GAGG-U-CACAC-CCG-UUC--C--CAUA-CCGAA-CACGGA-A----GUUAAG-CUCUCU-AGCG-CCG-AUG-GU-AGU-UGGGAC------CUU---GU-CCC--UGUG--AGAGUAGG-ACG--UCGCCAA-GCAAC--------------------------------------------

>Accession:CP000001::SeqID:30204::TaxID:2
--------------------------------------------------------------------------------------------------------------------------U-UGGUGA-UG-AU-GGC--A-G-A-GAGG-U-CACAC-CCG-UUC--C--CAUA-CCGAA-CACGGA-A----GUUAAG-CUCUCU-AGCG-CCG-AUG-GU-AGU-UGGGAC------CUU---GU-CCC--UGUG--AGAGUAGG-ACG--UCGCCAA-GCAAA--------------------------------------------

>Accession:AP006627::SeqID:30273::TaxID:2
----------------------------------------------------------------------------------------------------------------------------CGGUGG-CA-AU-GGC--A-A-A-GAGG-U-CACAC-CCG-UUC--C--CAUG-CCGAA-CACGGU-C----GUUAAG-CUCUUU-UGCG-UCG-AUG-GU-AGU-UAGGGG------CUU---CC-CCU--UGCG--AGAGUAGA-ACG--CUGCCGG--------------------------------------------------

>Accession:AP006627::SeqID:30274::TaxID:2
-------------------------------------------------------------------------------------------------------------------------UC-CGGUGA-CA-AU-GGC--A-A-A-GAGG-U-CACAC-CCG-UUC--C--CAUG-CCGAA-CACGGC-C----GUUAAG-CUCUUU-UGCG-CCG-AUG-GU-AGU-UGGAGG------CUU---CC-UCC--UGUG--AGAGUAGG-ACG--UUGCCGG-GC-----------------------------------------------

>Accession:AP006627::SeqID:30275::TaxID:2
-------------------------------------------------------------------------------------------------------------------------UC-CGGUGA-CA-AU-GGC--A-A-A-GAGG-U-CACAC-CCG-UUC--C--CAUG-CCGAA-CACGGC-C----GUUAAG-CUCUUU-UGCG-CCG-AUG-GU-AGU-UGGAGG------CUU---CC-UCC--UGCG--AGAGUAGG-ACG--UUGCCGG-GC-----------------------------------------------

>Accession:AP006627::SeqID:30276::TaxID:2
-------------------------------------------------------------------------------------------------------------------------UC-CGGUGA-CA-AU-GGC--A-A-A-GAGG-U-CACAC-CCG-UUC--C--CAUG-CCGAA-CACGGC-C----GUUAAG-CUCUUU-UGCG-CCG-AUG-GU-AGU-UGGAGG------CUU---CC-UCC--CGCG--AGAGUAGG-ACG--UUGCCGG-GC-----------------------------------------------

>Accession:AP006627::SeqID:30277::TaxID:2
-------------------------------------------------------------------------------------------------------------------------UC-CGGUGA-CA-AU-GGC--A-A-A-GAGG-U-CACAC-CCG-UUC--C--CAUG-CCGAA-CACGGC-C----GUUAAG-CUCUUU-UGCG-CCG-AUG-GU-AGU-UGGAGG------CUU---CC-UCC--CGCG--AGAGUAGG-ACG--UUGCCGG-GC-----------------------------------------------

>Accession:AP006627::SeqID:30278::TaxID:2
-------------------------------------------------------------------------------------------------------------------------UC-CGGUGA-CA-AU-GGC--A-A-A-GAGG-U-CACAC-CCG-UUC--C--CAUG-CCGAA-CACGGC-C----GUUAAG-CUCUUU-UGCG-CCG-AUG-GU-AGU-UGGAGG------CUU---CC-UCC--CGCG--AGAGUAGG-ACG--UUGCCGG-GC-----------------------------------------------

>Accession:AP006627::SeqID:30279::TaxID:2
-------------------------------------------------------------------------------------------------------------------------UC-CGGUGA-CA-AU-GGC--A-A-A-GAGG-U-CACAC-CCG-UUC--C--CAUG-CCGAA-CACGGC-C----GUUAAG-CUCUUU-UGCG-CCG-AUG-GU-AGU-UGGAGG------CUU---CC-UCC--CGCG--AGAGUAGG-ACG--UUGCCGG-GC-----------------------------------------------

>Accession:AP006627::SeqID:30280::TaxID:2
-------------------------------------------------------------------------------------------------------------------------UC-CGGUGA-CA-AU-GGC--A-A-A-GAGG-U-CACAC-CCG-UUC--C--CAUG-CCGAA-CACGGC-C----GUUAAG-CUCUUU-UGCG-CCG-AUG-GU-AGU-UGGAGG------CUU---CC-UCC--UGCG--AGAGUAGG-ACG--UUGCCGG-GC-----------------------------------------------

>Accession:X02025::SeqID:30335::TaxID:2
-------------------------------------------------------------------------------------------------------------------------UC-UGGUGG-CG-AU-AGC--G-A-G-AAGG-U-CACAC-CCG-UUC--C--CAUA-CCGAA-CACGGA-A----GUUAAG-CUUCUC-AGCG-CCG-AUG-GU-AGU-UAGGGG------CUG---UC-CCC--UGUG--AGAGUAGG-ACG--CUGCCAG-GC-----------------------------------------------

>Accession:AB031209::SeqID:30449::TaxID:2
-------------------------------------------------------------------------------------------------------------------------UU-UGGUGG-CG-AU-AGC--G-A-A-GAGG-C-CACAC-CCG-UUC--C--CAUG-CCGAA-CACGGU-C----GUUAAG-CUCUUC-AGCG-CCG-AUG-GU-AGU-UGGGGG------CUU---CC-CCC--UGCG--AGAGUAGG-ACG--CUGCCAA-GC-----------------------------------------------

>Accession:AB031210::SeqID:30450::TaxID:2
-------------------------------------------------------------------------------------------------------------------------UU-UGGUGG-CG-AU-AGC--G-A-A-GAGG-C-CACAC-CCG-UUC--C--CAUG-CCGAA-CACGGU-C----GUUAAG-CUCUUC-AGCG-CCG-AUG-GU-AGU-UGGGGG------CUU---CC-CCC--UGCG--AGAGUAGG-ACG--CUGCCAA-GC-----------------------------------------------

>Accession:AB031211::SeqID:30451::TaxID:2
-------------------------------------------------------------------------------------------------------------------------UU-UGGUGG-CG-AU-AGC--G-A-A-GAGG-C-CACAC-CCG-UUC--C--CAUG-CCGAA-CACGGU-C----GUUAAG-CUCUUC-AGCG-CCG-AUG-GU-AGU-UGGGGG------CUU---CC-CCC--UGCG--AGAGUAGG-ACG--CUGCCAA-AC-----------------------------------------------

>Accession:AB031212::SeqID:30452::TaxID:2
-------------------------------------------------------------------------------------------------------------------------UU-UGGUGG-CG-AU-AGC--G-A-A-GAGG-C-CACAC-CCG-UUC--C--CAUG-CCGAA-CACGGU-C----GUUAAG-CUCUUC-AGCG-CCG-AUG-GU-AGU-UGGGGG------CUU---CC-CCC--UGCG--AGAGUAGG-ACG--CUGCCAA-GC-----------------------------------------------

>Accession:AB031213::SeqID:30453::TaxID:2
-------------------------------------------------------------------------------------------------------------------------UU-UGGUGG-CG-AU-AGC--G-A-A-GAGG-C-CACAC-CCG-UUC--C--CAUG-CCGAA-CACGGU-C----GUUAAG-CUCUUC-AGCG-CCG-AUG-GU-AGU-UGGGGG------CUU---CC-CCC--UGCG--AGAGUAGG-ACG--CUGCCAA-G------------------------------------------------

>Accession:AB031214::SeqID:30454::TaxID:2
-------------------------------------------------------------------------------------------------------------------------UU-UGGUGG-CG-AU-AGC--G-A-A-GAGG-C-CACAC-CCG-UUC--C--CAUG-CCGAA-CACGGU-C----GUUAAG-CUCUUC-AGCG-CCG-AUG-GU-AGU-UGGGGA------CUU---CC-CCC--UGCG--AGAGUAGG-ACG--CUGCCAA-GC-----------------------------------------------

>Accession:AB031215::SeqID:30455::TaxID:2
-------------------------------------------------------------------------------------------------------------------------UU-UGGUGG-CG-AU-AGC--G-A-A-GAGG-U-CACAC-CCG-UUC--C--CAUG-CCGAA-CACGGU-C----GUUAAG-CUCUUC-AGCG-CCG-AUG-GU-AGU-UGGGGC------CUU---GC-CCC--UGCG--AGAGUAGG-ACG--CUGCCAA-G------------------------------------------------

>Accession:AB031209::SeqID:30457::TaxID:2
-------------------------------------------------------------------------------------------------------------------------UU-UGGUGG-CG-AU-AGC--G-A-A-GAGG-U-CACAC-CCG-UUC--C--CAUG-CCGAA-CACGGU-C----GUUAAG-CUCUUC-AGCG-CCG-AUG-GU-AGU-UGGGGC------CUU---GC-CCC--UGCG--AGAGUAGG-ACG--CUGCCAA-G------------------------------------------------

>Accession:AB013373::SeqID:30458::TaxID:2
-------------------------------------------------------------------------------------------------------------------------UU-UGGUGG-CG-AU-AGC--G-A-A-GAGG-C-CACAC-CCG-UUC--C--CAUG-CCGAA-CACGGU-C----GUUAAG-CUCUUC-AGCG-CCG-AUG-GU-AGU-UGGGGG------CUU---CC-CCC--UGCG--AGAGUAGG-ACG--CUGCCAA-A------------------------------------------------

>Accession:AP001507::SeqID:30483::TaxID:2
-------------------------------------------------------------------------------------------------------------------------UU-UGGUGG-CG-AU-AGC--G-A-A-GAGG-C-CACAC-CCG-UUC--C--CAUG-CCGAA-CACGGU-C----GUUAAG-CUCUUC-AGCG-CCG-AUG-GU-AGU-UGGGGG------CUU---CC-CCC--UGCG--AGAGUAGG-ACG--CUGCCAA-GC-----------------------------------------------

>Accession:AP001507::SeqID:30484::TaxID:2
-------------------------------------------------------------------------------------------------------------------------UU-UGGUGG-CG-AU-AGC--G-A-A-GAGG-C-CACAC-CCG-UUC--C--CAUG-CCGAA-CACGGU-C----GUUAAG-CUCUUC-AGCG-CCG-AUG-GU-AGU-UGGGGG------CUU---CC-CCC--UGCG--AGAGUAGG-ACG--CUGCCAA-GC-----------------------------------------------

>Accession:AP001507::SeqID:30485::TaxID:2
-------------------------------------------------------------------------------------------------------------------------UU-UGGUGG-CG-AU-AGC--G-A-A-GAGG-C-CACAC-CCG-UUC--C--CAUG-CCGAA-CACGGU-C----GUUAAG-CUCUUC-AGCG-CCG-AUG-GU-AGU-UGGGGG------CUU---CC-CCC--UGCG--AGAGUAGG-ACG--CUGCCAA-AC-----------------------------------------------

>Accession:AP001507::SeqID:30486::TaxID:2
-------------------------------------------------------------------------------------------------------------------------UU-UGGUGG-CG-AU-AGC--G-A-A-GAGG-C-CACAC-CCG-UUC--C--CAUG-CCGAA-CACGGU-C----GUUAAG-CUCUUC-AGCG-CCG-AUG-GU-AGU-UGGGGG------CUU---CC-CCC--UGCG--AGAGUAGG-ACG--CUGCCAA-GC-----------------------------------------------

>Accession:AP001507::SeqID:30487::TaxID:2
-------------------------------------------------------------------------------------------------------------------------UU-UGGUGG-CG-AU-AGC--G-A-A-GAGG-C-CACAC-CCG-UUC--C--CAUG-CCGAA-CACGGU-C----GUUAAG-CUCUUC-AGCG-CCG-AUG-GU-AGU-UGGGGG------CUU---CC-CCC--UGCG--AGAGUAGG-ACG--CUGCCAA-GC-----------------------------------------------

>Accession:AP001508::SeqID:30488::TaxID:2
-------------------------------------------------------------------------------------------------------------------------UU-UGGUGG-CG-AU-AGC--G-A-A-GAGG-C-CACAC-CCG-UUC--C--CAUG-CCGAA-CACGGU-C----GUUAAG-CUCUUC-AGCG-CCG-AUG-GU-AGU-UGGGGG------CUU---CC-CCC--UGCG--AGAGUAGG-ACG--CUGCCAA-GC-----------------------------------------------

>Accession:AP001508::SeqID:30489::TaxID:2
-------------------------------------------------------------------------------------------------------------------------UU-UGGUGG-CG-AU-AGC--G-A-A-GAGG-C-CACAC-CCG-UUC--C--CAUG-CCGAA-CACGGU-C----GUUAAG-CUCUUC-AGCG-CCG-AUG-GU-AGU-UGGGGC------CUU---GC-CCC--UGCG--AGAGUAGG-ACG--UUGCCAA-GC-----------------------------------------------

>Accession:AP001509::SeqID:30490::TaxID:2
-------------------------------------------------------------------------------------------------------------------------UU-UGGUGG-CG-AU-AGC--G-A-A-GAGG-C-CACAC-CCG-UUC--C--CAUG-CCGAA-CACGGU-C----GUUAAG-CUCUUC-AGCG-CCG-AUG-GU-AGU-UGGGGA------CUU---CC-CCC--UGCG--AGAGUAGG-ACG--CUGCCAA-GC-----------------------------------------------

>Accession:AP001510::SeqID:30491::TaxID:2
-------------------------------------------------------------------------------------------------------------------------UU-UGGUGG-CG-AU-AGC--G-A-A-GAGG-U-CACAC-CCG-UUC--C--CAUG-CCGAA-CACGGU-C----GUUAAG-CUCUUC-AGCG-CCG-AUG-GU-AGU-UGGGGC------CUU---GC-CCC--UGCG--AGAGUAGG-ACG--CUGCCAA-GC-----------------------------------------------

>Accession:BA000004::SeqID:30492::TaxID:2
-------------------------------------------------------------------------------------------------------------------------UU-UGGUGG-CG-AU-AGC--G-A-A-GAGG-C-CACAC-CCG-UUC--C--CAUG-CCGAA-CACGGU-C----GUUAAG-CUCUUC-AGCG-CCG-AUG-GU-AGU-UGGGGG------CUU---CC-CCC--UGCG--AGAGUAGG-ACG--CUGCCAA-GC-----------------------------------------------

>Accession:BA000004::SeqID:30493::TaxID:2
-------------------------------------------------------------------------------------------------------------------------UU-UGGUGG-CG-AU-AGC--G-A-A-GAGG-C-CACAC-CCG-UUC--C--CAUG-CCGAA-CACGGU-C----GUUAAG-CUCUUC-AGCG-CCG-AUG-GU-AGU-UGGGGG------CUU---CC-CCC--UGCG--AGAGUAGG-ACG--CUGCCAA-GC-----------------------------------------------

>Accession:BA000004::SeqID:30494::TaxID:2
-------------------------------------------------------------------------------------------------------------------------UU-UGGUGG-CG-AU-AGC--G-A-A-GAGG-C-CACAC-CCG-UUC--C--CAUG-CCGAA-CACGGU-C----GUUAAG-CUCUUC-AGCG-CCG-AUG-GU-AGU-UGGGGG------CUU---CC-CCC--UGCG--AGAGUAGG-ACG--CUGCCAA-AC-----------------------------------------------

>Accession:BA000004::SeqID:30495::TaxID:2
-------------------------------------------------------------------------------------------------------------------------UU-UGGUGG-CG-AU-AGC--G-A-A-GAGG-C-CACAC-CCG-UUC--C--CAUG-CCGAA-CACGGU-C----GUUAAG-CUCUUC-AGCG-CCG-AUG-GU-AGU-UGGGGG------CUU---CC-CCC--UGCG--AGAGUAGG-ACG--CUGCCAA-GC-----------------------------------------------

>Accession:BA000004::SeqID:30496::TaxID:2
-------------------------------------------------------------------------------------------------------------------------UU-UGGUGG-CG-AU-AGC--G-A-A-GAGG-C-CACAC-CCG-UUC--C--CAUG-CCGAA-CACGGU-C----GUUAAG-CUCUUC-AGCG-CCG-AUG-GU-AGU-UGGGGG------CUU---CC-CCC--UGCG--AGAGUAGG-ACG--CUGCCAA-GC-----------------------------------------------

>Accession:BA000004::SeqID:30497::TaxID:2
-------------------------------------------------------------------------------------------------------------------------UU-UGGUGG-CG-AU-AGC--G-A-A-GAGG-C-CACAC-CCG-UUC--C--CAUG-CCGAA-CACGGU-C----GUUAAG-CUCUUC-AGCG-CCG-AUG-GU-AGU-UGGGGG------CUU---CC-CCC--UGCG--AGAGUAGG-ACG--CUGCCAA-GC-----------------------------------------------

>Accession:BA000004::SeqID:30498::TaxID:2
-------------------------------------------------------------------------------------------------------------------------UU-UGGUGG-CG-AU-AGC--G-A-A-GAGG-C-CACAC-CCG-UUC--C--CAUG-CCGAA-CACGGU-C----GUUAAG-CUCUUC-AGCG-CCG-AUG-GU-AGU-UGGGGC------CUU---GC-CCC--UGCG--AGAGUAGG-ACG--UUGCCAA-GC-----------------------------------------------

>Accession:BA000004::SeqID:30499::TaxID:2
-------------------------------------------------------------------------------------------------------------------------UU-UGGUGG-CG-AU-AGC--G-A-A-GAGG-C-CACAC-CCG-UUC--C--CAUG-CCGAA-CACGGU-C----GUUAAG-CUCUUC-AGCG-CCG-AUG-GU-AGU-UGGGGA------CUU---CC-CCC--UGCG--AGAGUAGG-ACG--CUGCCAA-GC-----------------------------------------------

>Accession:BA000004::SeqID:30500::TaxID:2
-------------------------------------------------------------------------------------------------------------------------UU-UGGUGG-CG-AU-AGC--G-A-A-GAGG-U-CACAC-CCG-UUC--C--CAUG-CCGAA-CACGGU-C----GUUAAG-CUCUUC-AGCG-CCG-AUG-GU-AGU-UGGGGC------CUU---GC-CCC--UGCG--AGAGUAGG-ACG--CUGCCAA-GC-----------------------------------------------

>Accession:M67444::SeqID:30583::TaxID:2
-------------------------------------------------------------------------------------------------------------------------UU-UGGUGG-CG-AU-AGC--G-A-A-GAGG-U-CACAC-CCG-UUC--C--CAUG-CCGAA-CACGGA-A----GUUAAG-CUCUUC-AGCG-CCG-AUG-GU-AGU-UGGGGG------CUU---CC-CCC--UGUG--AGAGUAGG-ACG--CCGCCAA-GC-----------------------------------------------

>Accession:CP000002::SeqID:30771::TaxID:2
------------------------------------------------------------------------------------------------------------------------GUU-UGGUGG-CG-AU-AGC--G-A-A-GAGG-U-CACAC-CCG-UUC--C------------------------------------------------------------------------------------------------------------------------------------------------------------------

>Accession:AE017333::SeqID:30772::TaxID:2
------------------------------------------------------------------------------------------------------------------------GUC-UGGUGA-UG-AU-GGC--G-A-A-GAGG-U-CACAC-CCG-UUC--C--CAUG-CCGAA-CACGGA-A----GUUAAG-CUCUUC-AGCG-CCG-AUG-GU-AGU-UGGGGG------CUU---CC-CCC--UGCG--AGAGUAGG-ACA--UCGCCAG-GC-----------------------------------------------

>Accession:CP000002::SeqID:30773::TaxID:2
------------------------------------------------------------------------------------------------------------------------------------------GC--G-A-A-GAGG-U-CACAC-CCG-UUC--C--CAUG-CCGAA-CACGGA-A----GUUAAG-CUCUUC-AGCG-CCG-AUG-GU-AGU-UGGGGG------CUU---CC-CCC--UGCG--AGAGUAGG-AC------------------------------------------------------------

>Accession:CP000002::SeqID:30774::TaxID:2
-------------------------------------------------------------------------------------------------------------------------UU-UGGUGG-CG-AU-AGC--G-A-A-GAGG-U-CACAC-CCG-UUC--C--CAUG-CCGAA-CACGGA-A----GUUAAG-CUCUUC-AGCG-CCG-AUG-GU-AGU-UGGGGG------CUU---CC-CCC--UGUG--AGAGUAGG-ACG--CCGCCAA-GC-----------------------------------------------

>Accession:CP000002::SeqID:30775::TaxID:2
-------------------------------------------------------------------------------------------------------------------------UU-UGGUGG-CG-AU-AGC--G-A-A-GAGG-U-CACAC-CCG-UUC--C--CAUG-CCGAA-CACGGA-A----GUUAAG-CUCUUC-AGCG-CCG-AUG-GU-AGU-UGGGGG------CUU---CC-CCC--UGUG--AGAGUAGG-ACG--CCGCCAA-GC-----------------------------------------------

>Accession:CP000002::SeqID:30776::TaxID:2
-------------------------------------------------------------------------------------------------------------------------UU-UGGUGG-CG-AU-AGC--G-A-A-GAGG-U-CACAC-CCG-UUC--C--CAUG-CCGAA-CACGGA-A----GUUAAG-CUCUUC-AGCG-CCG-AUG-GU-AGU-UGGGGG------CUU---CC-CCC--UGUG--AGAGUAGG-ACG--CCGCCAA-GC-----------------------------------------------

>Accession:CP000002::SeqID:30777::TaxID:2
-------------------------------------------------------------------------------------------------------------------------UU-UGGUGG-CG-AU-AGC--G-A-A-GAGG-U-CACAC-CCG-UUC--C--CAUG-CCGAA-CACGGA-A----GUUAAG-CUCUUC-AGCG-CCG-AUG-GU-AGU-UGGGGG------CUU---CC-CCC--UGUG--AGAGUAGG-ACG--CCGCCAA-GC-----------------------------------------------

>Accession:CP000002::SeqID:30778::TaxID:2
--------------------------------------------------------------------------------------------------------------------------U-UGGUGG-CG-AU-AGC--G-A-A-GAGG-U-CACAC-CCG-UUC--C--CAUG-CCGAA-CACGGA-A----GUUAAG-CUCUUC-AGCG-CCG-AUG-GU-AGU-UGGGGG------CUU---CC-CCC--UGUG--AGAGUAGG-ACG--CCGCCAA-GCG----------------------------------------------

>Accession:AE017333::SeqID:30779::TaxID:2
---------------------------------------------------------------------------------------------------------------gaaggcauaGUU-UGGUGG-CG-AU-AGC--G-A-A-GAGG-U-CACAC-CCG-UUC--C--CAUG-CCGAA-CACGGA-A----GUUAAG-CUCUUC-AGCG-CCG-AUG-GU-AGU-UGGGGG------CUU---CC-CCC--UGUG--AGAGUAGG-ACG--CCGCCAA-G------------------------------------------------

>Accession:AE017333::SeqID:30780::TaxID:2
---------------------------------------------------------------------------------------------------------------gaaggcauaGUU-UGGUGG-CG-AU-AGC--G-A-A-GAGG-U-CACAC-CCG-UUC--C--CAUG-CCGAA-CACGGA-A----GUUAAG-CUCUUC-AGCG-CCG-AUG-GU-AGU-UGGGGG------CUU---CC-CCC--UGUG--AGAGUAGG-ACG--CCGCCAA-G------------------------------------------------

>Accession:AE017333::SeqID:30781::TaxID:2
---------------------------------------------------------------------------------------------------------------gaaggcauaGUU-UGGUGG-CG-AU-AGC--G-A-A-GAGG-U-CACAC-CCG-UUC--C--CAUG-CCGAA-CACGGA-A----GUUAAG-CUCUUC-AGCG-CCG-AUG-GU-AGU-UGGGGG------CUU---CC-CCC--UGUG--AGAGUAGG-ACG--CCGCCAA-G------------------------------------------------

>Accession:AE017333::SeqID:30782::TaxID:2
---------------------------------------------------------------------------------------------------------------gaaggcauaGUU-UGGUGG-CG-AU-AGC--G-A-A-GAGG-U-CACAC-CCG-UUC--C--CAUG-CCGAA-CACGGA-A----GUUAAG-CUCUUC-AGCG-CCG-AUG-GU-AGU-UGGGGG------CUU---CC-CCC--UGUG--AGAGUAGG-ACG--CCGCCAA-G------------------------------------------------

>Accession:AE017333::SeqID:30783::TaxID:2
---------------------------------------------------------------------------------------------------------------gaaggcauaGUU-UGGUGG-CG-AU-AGC--G-A-A-GAGG-U-CACAC-CCG-UUC--C--CAUG-CCGAA-CACGGA-A----GUUAAG-CUCUUC-AGCG-CCG-AUG-GU-AGU-UGGGGG------CUU---CC-CCC--UGUG--AGAGUAGG-ACG--CCGCCAA-G------------------------------------------------

>Accession:AE017333::SeqID:30784::TaxID:2
---------------------------------------------------------------------------------------------------------------gaaggcauaGUU-UGGUGG-CG-AU-AGC--G-A-A-GAGG-U-CACAC-CCG-UUC--C--CAUG-CCGAA-CACGGA-A----GUUAAG-CUCUUC-AGCG-CCG-AUG-GU-AGU-UGGGGG------CUU---CC-CCC--UGUG--AGAGUAGG-ACG--CCGCCAA-G------------------------------------------------

>Accession:AF14267::SeqID:30873::TaxID:2
-------------------------------------------------------------------------------------------------------------------------UC-URGUGG-CG-AU-AGC--G-A-A-GAGG-U-CACAC-CCG-UUC--C--CAUA-CCGAA-CACGGA-A----GUUAAG-CUCUUU-AGCG-CCR-AUG-GU-AGU-UGGGAC------UUU---GU-CCC--UGKG--AGAGUAGG-ACG--UUGCYAG-GC-----------------------------------------------

>Accession:X01940::SeqID:30874::TaxID:2
-------------------------------------------------------------------------------------------------------------------------UC-UGGUGG-CG-AU-AGC--G-A-A-GAGG-U-CACAC-CCG-UUC--C--CAUA-CCGAA-CACGGA-A----GUUAAG-CUCUUU-AGCG-CCA-AUG-GU-AGU-UGGGAC------UUU---GU-CCC--UGUG--AGAGUAGG-ACG--UUGCCAG-GC-----------------------------------------------

>Accession:X02023::SeqID:30875::TaxID:2
-------------------------------------------------------------------------------------------------------------------------UC-UGGUGG-CG-AU-AGC--G-A-A-GAGG-U-CACAC-CCG-UUC--C--CAUA-CCGAA-CACGGA-A----GUUAAG-CUCUUU-AGCG-CCG-AUG-GU-AGU-UGGGAC------UUU---GU-CCC--UGUG--AGAGUAGG-ACG--UUGCCAG-GC-----------------------------------------------

>Accession:Z11820::SeqID:30949::TaxID:2
-------------------------------------------------------------------------------------------------------------------------YY-YGGUGG-AU-UA-GGC--G-A-A-GAGG-U-UACAC-CCG-UUC--C--CAUC-CCGAA-CACAGC-C----GAGAAA-CUCUUC-AGCG-CCG-AUG-GU-AGU-UGGGGG------UCU---CC-CCC--UGUG--AGAGCAGG-ACG--CCGCUCG-GG-----------------------------------------------

>Accession:Z11817::SeqID:30950::TaxID:2
-------------------------------------------------------------------------------------------------------------------------YY-UGGUGG-CG-AU-GGC--G-A-G-AAGG-U-CACAC-CCG-UUC--C--CAUR-CCGAA-CACGGA-A----GUUAAG-CUUCUC-AGCG-CCG-AUG-GU-AGU-UGGGGC------AUU---GC-CCC--UGCG--AGAGUAGG-ACG--CUGCCAG-GC-----------------------------------------------

>Accession:Z11818::SeqID:30951::TaxID:2
-------------------------------------------------------------------------------------------------------------------------YY-UGGUGG-CG-AU-GGC--G-A-G-AAGG-U-CACAC-CCG-UUC--C--CAUA-CCGAA-CACGGA-G----GUUAAG-CUUCUC-AGCG-CCG-AUG-GU-AGU-UGGGGC------AUU---GC-CCC--UGCG--AGAGUAGG-ACG--UUGCCAG-GC-----------------------------------------------

>Accession:Z11824::SeqID:30952::TaxID:2
-------------------------------------------------------------------------------------------------------------------------YY-UGGUGG-CG-AU-GGC--G-A-G-AAGG-U-CACAC-CCG-UUC--C--CAUG-CCGAA-CACGGA-G----GUUAAG-CUUCUC-AGCG-CCG-AUG-GU-AGU-UGGGGC------AUU---GC-CCC--UGCG--AGAGUAGG-ACG--CUGCCAG-GC-----------------------------------------------

>Accession:Z11819::SeqID:30953::TaxID:2
-------------------------------------------------------------------------------------------------------------------------YY-UGGUGG-CG-AU-GGC--G-A-G-AAGG-U-CACAC-CCG-UUC--C--CAUA-CCGAA-CACGGA-G----GUUAAG-CUUCUC-AGCG-CCG-AUG-GU-AGU-UGGGGC------AUU---GC-CCC--UGYG--AGAGUAGG-ACG--CUGCCAG-GC-----------------------------------------------

>Accession:Z11827::SeqID:30954::TaxID:2
-------------------------------------------------------------------------------------------------------------------------CC-UGGUGG-CG-AU-GGC--G-A-G-AAGG-U-CACAC-CCG-UUC--C--CAUA-CCGAA-CACGGA-A----GUUAAG-CUUCUC-AGCG-CCG-AUG-GU-AGU-UGGGGC------AUU---GC-CCC--UGCG--AGAGUAGG-ACG--CUGCCAG-GC-----------------------------------------------

>Accession:Z11826::SeqID:30955::TaxID:2
-------------------------------------------------------------------------------------------------------------------------CC-UGGUGG-CG-AU-GGC--G-A-G-AAGG-U-CACAC-CCG-UUC--C--CAUA-CCGAA-CACGGA-A----GUUAAG-CUUCUC-AGCG-CCG-AUG-GU-AGU-UGGGGC------AUU---GC-CCC--UGCG--AGAGUAGG-ACG--CUGCCAG-GC-----------------------------------------------

>Accession:Z11816::SeqID:30956::TaxID:2
-------------------------------------------------------------------------------------------------------------------------CC-UGGUGG-CG-AU-GGC--G-A-G-AAGG-U-CACAC-CCG-UUC--C--CAUA-CCGAA-CACGGA-A----GUUAAG-CUUCUC-AGCG-CCG-AUG-GU-AGU-UGGGGC------AUU---GC-CCC--UGCG--AGAGUAGG-ACG--CUGCCAG-GC-----------------------------------------------

>Accession:Z11825::SeqID:30957::TaxID:2
-------------------------------------------------------------------------------------------------------------------------YY-UGGUGG-CG-UU-GGC--G-A-G-AAGG-U-CACAC-CCG-UUC--C--CAUG-CCGAA-CACGGA-A----GUUAAG-CUUCUC-AGCG-CCG-AUG-GU-AGU-UGGGGC------AUU---GC-CCC--UGCG--AGAGUAGG-ACG--CUGCCAG-GC-----------------------------------------------

>Accession:Z11823::SeqID:30958::TaxID:2
-------------------------------------------------------------------------------------------------------------------------CC-UGGUGG-CG-AU-GGC--G-A-G-AAGG-U-CACAC-CCG-UUC--C--CAUA-CCGAA-CACGGA-A----GUUAAG-CUUCUC-AGCG-CCG-AUG-GU-AGU-UGGGGC------AUU---GC-CCC--UGCG--AGAGUAGG-ACG--UUGCCAG-GC-----------------------------------------------

>Accession:Z11822::SeqID:30959::TaxID:2
-------------------------------------------------------------------------------------------------------------------------CC-UGGUGG-CG-AU-GGC--G-A-G-AAGG-A-CACAC-CCG-UUC--C--CAUA-CCGAA-CACGGA-A----GUUAAG-CUUCUC-AGCG-CCG-AUG-GU-AGU-UGGGGC------AUU---GC-CCC--UGCG--AGAGUAGG-ACG--CUGCCAG-GC-----------------------------------------------

>Accession:Z11821::SeqID:30960::TaxID:2
-------------------------------------------------------------------------------------------------------------------------YY-UGGUGG-CG-AU-GGC--G-A-G-AAGG-U-CACAC-CCG-UUC--C--CAUG-CCGAA-CACGGA-A----GUUAAG-CUUCUC-AGCG-CCG-AUG-GU-AGU-UGGGGC------AUU---GC-CCC--UGCG--AGAGUAGG-ACG--UUGCCAG-GC-----------------------------------------------

>Accession:AF267887::SeqID:30992::TaxID:2
-------------------------------------------------------------------------------------------------------------------------UU-UGGUGA-UG-AU-GGC--A-G-A-GAGG-U-CACAC-CCG-UUC--C--CAUA-CCGAA-CACGGA-A----GUUAAG-CUCUCU-AGCG-CCG-AUG-GU-AGU-UGGGAC------CUU---GU-CCC--UGUG--AGAGUAGG-ACG--CCGCC----------------------------------------------------

>Accession:AF267888::SeqID:30993::TaxID:2
-------------------------------------------------------------------------------------------------------------------------UU-UGGUGA-UG-AU-GGC--A-G-A-GAGG-U-CACAC-CCG-UUC--C--CAUA-CCGAA-CACGGA-A----GUUAAG-CUCUCU-AGCG-CCG-AUG-GU-AGU-UGGGAC------CUU---GU-CCC--UGUG--AGAGUAGG-ACG--CCGCC----------------------------------------------------

>Accession:K03155::SeqID:32686::TaxID:2
-------------------------------------------------------------------------------------------------------------------------UU-UGGUGG-CG-AU-AGC--G-A-A-GAGG-U-CACAC-CCG-UUC--C--CAUG-CCGAA-CACGGA-A----GUUAAG-CUCUUC-AGCG-CCG-AUG-GU-AGU-CGGGGG------UUU---CC-CCC--UGUG--AGAGUAGG-ACG--CCGCCAA-GC-----------------------------------------------

>Accession:X01353::SeqID:32687::TaxID:2
-------------------------------------------------------------------------------------------------------------------------UU-UGGUGG-CG-AU-AGC--G-A-A-GAGG-U-CACAC-CCG-UUC--C--CAUG-CCGAA-CACGGA-A----GUUAAG-CUCUUC-AGCG-CCG-AUG-GU-AGU-CGGGGG------UUU---CC-CCC--UGUG--AGAGUAGG-ACG--CCGCCAA-GC-----------------------------------------------

>Accession:X04166::SeqID:33108::TaxID:2
-------------------------------------------------------------------------------------------------------------------------UU-UGGUGG-CG-AU-AGC--G-A-A-GAGG-U-CACAC-CCG-UUC--C--CAUA-CCGAA-CACGGA-A----GUUAAG-CUCUUC-AGCG-CCG-AUG-GU-AGU-CGGGGG------UUU---CC-CCC--UGUG--AGAGUAGG-ACG--CCGCC----------------------------------------------------

>Accession:X04167::SeqID:33109::TaxID:2
-------------------------------------------------------------------------------------------------------------------------UU-UGGUGG-CG-AU-AGC--G-A-A-GAGG-U-CACAC-CCG-UUC--C--CAUA-CCGAA-CACGGA-A----GUUAAG-CUCUUC-AGCG-CCG-AUG-GU-AGU-CGGGGG------UUU---CC-CCC--UGUG--AGAGUAGG-ACG--CCGCC----------------------------------------------------

>Accession:D11460::SeqID:33110::TaxID:2
-----------------------------------------------------------------------------------------------------------------------NNNU-UGGUGG-CG-AU-AGC--G-A-A-GAGG-U-CACAC-CCG-UUC--C--CAUA-CCGAA-CACGGA-A----GUUAAG-CUCUUC-AGCG-CCG-AUG-GU-AGU-CGGGGG------UUU---CC-CCC--UGUG--AGAGUAGG-ACG--CCGCCAA-GC-----------------------------------------------

>Accession:M10473::SeqID:33111::TaxID:2
-------------------------------------------------------------------------------------------------------------------------UU-UGGUGG-CG-AU-AGC--G-A-A-GAGG-U-CACAC-CCG-UUC--C--CAUA-CCGAA-CACGGA-A----GUUAAG-CUCUUC-AGCG-CCG-AUG-GU-AGU-CGGGGG------UUU---CC-CCC--UGUG--AGAGUAGG-ACG--CCGCCAA-G------------------------------------------------

>Accession:Z82044::SeqID:33112::TaxID:2
-------------------------------------------------------------------------------------------------------------------------UC-UGGUGA-UG-AU-GGC--G-A-A-GAGG-U-CACAC-CCG-UUC--C--CAUG-CCGAA-CACGGA-A----GUUAAG-CUCUUC-AGCG-CCG-AUG-GU-AGU-CGGGGG------UUU---CC-CCC--UGUG--AGAGUAGG-ACA--UCGCCAG-GC-----------------------------------------------

>Accession:K03163::SeqID:33113::TaxID:2
-------------------------------------------------------------------------------------------------------------------------UU-UGGUGG-CG-AU-AGC--G-A-A-GAGG-U-CACAC-CCG-UUC--C--CAUA-CCGAA-CACGGA-A----GUUAAG-CUCUUC-AGCG-CCG-AUG-GU-AGU-CGGGGG------UUU---CC-CCC--UGUG--AGAGUAGG-ACG--CCGCCAA-GC-----------------------------------------------

>Accession:K01389::SeqID:33114::TaxID:2
-------------------------------------------------------------------------------------------------------------------------UC-UGGUGA-UG-AU-GGC--G-A-A-GAGG-U-CACAC-CCG-UUC--C--CAUG-CCGAA-CACGGA-A----GUUAAG-CUCUUC-AGCG-CCG-AUG-GU-AGU-CGGGGG------UUU---CC-CCC--UGUG--AGAGUAGG-ACA--UCGCCAG-GC-----------------------------------------------

>Accession:D00110::SeqID:33115::TaxID:2
-------------------------------------------------------------------------------------------------------------------------UU-UGGUGG-CG-AU-AGC--G-A-A-GAGG-U-CACAC-CCG-UUC--C--CAUA-CCGAA-CACGGU-A----GUUAAG-CUCUUC-AGCG-CCG-AUG-GU-GAG-UGGGGG------CUU---CC-CCC--UGUG--AGAGUAGG-ACG--CCGCCAA-GC-----------------------------------------------

>Accession:K00637::SeqID:33116::TaxID:2
-------------------------------------------------------------------------------------------------------------------------UU-UGGUGG-CG-AU-AGC--G-A-A-GAGG-U-CACAC-CCG-UUC--C--CAUA-CCGAA-CACGGA-A----GUUAAG-CUCUUC-AGCG-CCG-AUG-GU-AGU-CGGGGG------UUU---CC-CCC--UGUG--AGAGUAGG-ACG--CCGCCAA-GC-----------------------------------------------

>Accession:V00102::SeqID:33117::TaxID:2
-------------------------------------------------------------------------------------------------------------------------UU-UGGUGG-CG-AU-AGC--G-A-A-GAGG-U-CACAC-CCG-UUC--C--CAUA-CCGAA-CACGGA-A----GUUAAG-CUCUUC-AGCG-CCG-AUG-GU-AGU-CGGGGG------UUU---CC-CCC--UGUG--AGAGUAGG-ACG--CCGCCAA-GC-----------------------------------------------

>Accession:M10815::SeqID:33118::TaxID:2
-------------------------------------------------------------------------------------------------------------------------UU-UGGUGG-CG-AU-AGC--G-A-A-GAGG-U-CACAC-CCG-UUC--C--CAUA-CCGAA-CACGGA-A----GUUAAG-CUCUUC-AGCG-CCG-AUG-GU-AGU-CGGGGG------UUU---CC-CCC--UGUG--AGAGUAGG-ACG--CCGCCAA-GC-----------------------------------------------

>Accession:K02843::SeqID:33119::TaxID:2
-------------------------------------------------------------------------------------------------------------------------UU-UGGUGG-CG-AU-AGC--G-A-A-GAGG-U-CACAC-CCG-UUC--C--CAUA-CCGAA-CACGGA-A----GUUAAG-CUCUUC-AGCG-CCG-AUG-GU-AGU-CGGGGG------UUU---CC-CCC--UGUG--AGAGUAGG-ACG--CCGCCAA-GC-----------------------------------------------

>Accession:K01986::SeqID:33120::TaxID:2
-------------------------------------------------------------------------------------------------------------------------UU-UGGUGG-CG-AU-AGC--G-A-A-GAGG-U-CACAC-CCG-UUC--C--CAUA-CCGAA-CACGGA-A----GUUAAG-CUCUUC-AGCG-CCG-AUG-GU-AGU-CGGGGG------UUU---CC-CCC--UGUG--AGAGUAGG-ACG--CCGCCAA-GC-----------------------------------------------

>Accession:K01390::SeqID:33121::TaxID:2
-------------------------------------------------------------------------------------------------------------------------UU-UGGUGG-CG-AU-AGC--G-A-A-GAGG-U-CACAC-CCG-UUC--C--CAUA-CCGAA-CACGGA-A----GUUAAG-CUCUUC-AGCG-CCG-AUG-GU-AGU-CGGGGG------UUU---CC-CCC--UGUG--AGAGUAGG-ACG--CCGCCAA-GC-----------------------------------------------

>Accession:X05525::SeqID:33122::TaxID:2
-------------------------------------------------------------------------------------------------------------------------UU-UGGUGG-CG-AU-AGC--G-A-A-GAGG-U-CACAC-CCG-UUC--C--CAUA-CCGAA-CACGGU-A----GUUAAG-CUCUUC-AGCG-CCG-AUG-GU-GAG-UGGGGG------CUU---CC-CCC--UGUG--AGAGUAGG-ACG--CCGCCAA-GC-----------------------------------------------

>Accession:L08236::SeqID:33123::TaxID:2
------------------------------------------------------------------------------------------------------------------------GUU-UGGUGG-CG-AU-AGC--G-A-A-GAGG-U-CACAC-CCG-UUC--C--CAUA-CCGAA-CACGGA-A----GUUAAG-CUCUUC-AGCG-CCG-AUG-GU-AGU-CGGGGG------UUU---CC-CCC--UGUG--AGAGUAGG-ACG--CCGCCAA-GC-----------------------------------------------

>Accession:Z99104::SeqID:33459::TaxID:2
-------------------------------------------------------------------------------------------------------------------------UU-UGGUGG-CG-AU-AGC--G-A-A-GAGG-U-CACAC-CCG-UUC--C--CAUA-CCGAA-CACGGA-A----GUUAAG-CUCUUC-AGCG-CCG-AUG-GU-AGU-CGGGGG------UUU---CC-CCC--UGUG--AGAGUAGG-ACG--CCGCC----------------------------------------------------

>Accession:Z99104::SeqID:33460::TaxID:2
-------------------------------------------------------------------------------------------------------------------------UU-UGGUGG-CG-AU-AGC--G-A-A-GAGG-U-CACAC-CCG-UUC--C--CAUA-CCGAA-CACGGA-A----GUUAAG-CUCUUC-AGCG-CCG-AUG-GU-AGU-CGGGGG------UUU---CC-CCC--UGUG--AGAGUAGG-ACG--CCGCC----------------------------------------------------

>Accession:Z99104::SeqID:33461::TaxID:2
-------------------------------------------------------------------------------------------------------------------------UU-UGGUGG-CG-AU-AGC--G-A-A-GAGG-U-CACAC-CCG-UUC--C--CAUA-CCGAA-CACGGA-A----GUUAAG-CUCUUC-AGCG-CCG-AUG-GU-AGU-CGGGGG------UUU---CC-CCC--UGUG--AGAGUAGG-ACG--CCGCC----------------------------------------------------

>Accession:Z99104::SeqID:33462::TaxID:2
-------------------------------------------------------------------------------------------------------------------------UU-UGGUGG-CG-AU-AGC--G-A-A-GAGG-U-CACAC-CCG-UUC--C--CAUA-CCGAA-CACGGA-A----GUUAAG-CUCUUC-AGCG-CCG-AUG-GU-AGU-CGGGGG------UUU---CC-CCC--UGUG--AGAGUAGG-ACG--CCGCC----------------------------------------------------

>Accession:Z99104::SeqID:33463::TaxID:2
-------------------------------------------------------------------------------------------------------------------------UU-UGGUGG-CG-AU-AGC--G-A-A-GAGG-U-CACAC-CCG-UUC--C--CAUA-CCGAA-CACGGA-A----GUUAAG-CUCUUC-AGCG-CCG-AUG-GU-AGU-CGGGGG------UUU---CC-CCC--UGUG--AGAGUAGG-ACG--CCGCCAA-GC-----------------------------------------------

>Accession:Z99104::SeqID:33464::TaxID:2
-------------------------------------------------------------------------------------------------------------------------UU-UGGUGG-CG-AU-AGC--G-A-A-GAGG-U-CACAC-CCG-UUC--C--CAUA-CCGAA-CACGGA-A----GUUAAG-CUCUUC-AGCG-CCG-AUG-GU-AGU-CGGGGG------UUU---CC-CCC--UGUG--AGAGUAGG-ACG--CCGCCAA-GC-----------------------------------------------

>Accession:Z99104::SeqID:33465::TaxID:2
-------------------------------------------------------------------------------------------------------------------------UU-UGGUGG-CG-AU-AGC--G-A-A-GAGG-U-CACAC-CCG-UUC--C--CAUA-CCGAA-CACGGA-A----GUUAAG-CUCUUC-AGCG-CCG-AUG-GU-AGU-CGGGGG------UUU---CC-CCC--UGUG--AGAGUAGG-ACG--CCGCCAA-GC-----------------------------------------------

>Accession:Z99107::SeqID:33466::TaxID:2
-------------------------------------------------------------------------------------------------------------------------UU-UGGUGG-CG-AU-AGC--G-A-A-GAGG-U-CACAC-CCG-UUC--C--CAUA-CCGAA-CACGGA-A----GUUAAG-CUCUUC-AGCG-CCG-AUG-GU-AGU-CGGGGG------UUU---CC-CCC--UGUG--AGAGUAGG-ACG--CCGCCAA-GC-----------------------------------------------

>Accession:Z99108::SeqID:33467::TaxID:2
-------------------------------------------------------------------------------------------------------------------------UC-UGGUGA-UG-AU-GGC--G-A-A-GAGG-U-CACAC-CCG-UUC--C--CAUG-CCGAA-CACGGA-A----GUUAAG-CUCUUC-AGCG-CCG-AUG-GU-AGU-CGGGGG------UUU---CC-CCC--UGUG--AGAGUAGG-ACA--UCGCCAG-GC-----------------------------------------------

>Accession:Z99119::SeqID:33468::TaxID:2
-------------------------------------------------------------------------------------------------------------------------UU-UGGUGG-CG-AU-AGC--G-A-A-GAGG-U-CACAC-CCG-UUC--C--CAUA-CCGAA-CACGGA-A----GUUAAG-CUCUUC-AGCG-CCG-AUG-GU-AGU-CGGGGG------UUU---CC-CCC--UGUG--AGAGUAGG-ACG--CCGCCAA-GC-----------------------------------------------

>Accession:AL009126::SeqID:33469::TaxID:2
-------------------------------------------------------------------------------------------------------------------------UU-UGGUGG-CG-AU-AGC--G-A-A-GAGG-U-CACAC-CCG-UUC--C--CAUA-CCGAA-CACGGA-A----GUUAAG-CUCUUC-AGCG-CCG-AUG-GU-AGU-CGGGGG------UUU---CC-CCC--UGUG--AGAGUAGG-ACG--CCGCCAA-GC-----------------------------------------------

>Accession:AL009126::SeqID:33470::TaxID:2
-------------------------------------------------------------------------------------------------------------------------UU-UGGUGG-CG-AU-AGC--G-A-A-GAGG-U-CACAC-CCG-UUC--C--CAUA-CCGAA-CACGGA-A----GUUAAG-CUCUUC-AGCG-CCG-AUG-GU-AGU-CGGGGG------UUU---CC-CCC--UGUG--AGAGUAGG-ACG--CCGCCAA-GC-----------------------------------------------

>Accession:AL009126::SeqID:33471::TaxID:2
-------------------------------------------------------------------------------------------------------------------------UC-UGGUGA-UG-AU-GGC--G-A-A-GAGG-U-CACAC-CCG-UUC--C--CAUG-CCGAA-CACGGA-A----GUUAAG-CUCUUC-AGCG-CCG-AUG-GU-AGU-CGGGGG------UUU---CC-CCC--UGUG--AGAGUAGG-ACA--UCGCCAG-GC-----------------------------------------------

>Accession:AL009126::SeqID:33472::TaxID:2
-------------------------------------------------------------------------------------------------------------------------UU-UGGUGG-CG-AU-AGC--G-A-A-GAGG-U-CACAC-CCG-UUC--C--CAUA-CCGAA-CACGGA-A----GUUAAG-CUCUUC-AGCG-CCG-AUG-GU-AGU-CGGGGG------UUU---CC-CCC--UGUG--AGAGUAGG-ACG--CCGCCAA-GC-----------------------------------------------

>Accession:AL009126::SeqID:33473::TaxID:2
-------------------------------------------------------------------------------------------------------------------------UU-UGGUGG-CG-AU-AGC--G-A-A-GAGG-U-CACAC-CCG-UUC--C--CAUA-CCGAA-CACGGA-A----GUUAAG-CUCUUC-AGCG-CCG-AUG-GU-AGU-CGGGGG------UUU---CC-CCC--UGUG--AGAGUAGG-ACG--CCGCCAA-GC-----------------------------------------------

>Accession:AL009126::SeqID:33474::TaxID:2
-------------------------------------------------------------------------------------------------------------------------UU-UGGUGG-CG-AU-AGC--G-A-A-GAGG-U-CACAC-CCG-UUC--C--CAUA-CCGAA-CACGGA-A----GUUAAG-CUCUUC-AGCG-CCG-AUG-GU-AGU-CGGGGG------UUU---CC-CCC--UGUG--AGAGUAGG-ACG--CCGCCAA-GC-----------------------------------------------

>Accession:AL009126::SeqID:33475::TaxID:2
-------------------------------------------------------------------------------------------------------------------------UU-UGGUGG-CG-AU-AGC--G-A-A-GAGG-U-CACAC-CCG-UUC--C--CAUA-CCGAA-CACGGA-A----GUUAAG-CUCUUC-AGCG-CCG-AUG-GU-AGU-CGGGGG------UUU---CC-CCC--UGUG--AGAGUAGG-ACG--CCGCCAA-GC-----------------------------------------------

>Accession:AL009126::SeqID:33476::TaxID:2
-------------------------------------------------------------------------------------------------------------------------UU-UGGUGG-CG-AU-AGC--G-A-A-GAGG-U-CACAC-CCG-UUC--C--CAUA-CCGAA-CACGGA-A----GUUAAG-CUCUUC-AGCG-CCG-AUG-GU-AGU-CGGGGG------UUU---CC-CCC--UGUG--AGAGUAGG-ACG--CCGCCAA-GC-----------------------------------------------

>Accession:AL009126::SeqID:33477::TaxID:2
-------------------------------------------------------------------------------------------------------------------------UU-UGGUGG-CG-AU-AGC--G-A-A-GAGG-U-CACAC-CCG-UUC--C--CAUA-CCGAA-CACGGA-A----GUUAAG-CUCUUC-AGCG-CCG-AUG-GU-AGU-CGGGGG------UUU---CC-CCC--UGUG--AGAGUAGG-ACG--CCGCCAA-GC-----------------------------------------------

>Accession:AL009126::SeqID:33478::TaxID:2
-------------------------------------------------------------------------------------------------------------------------UU-UGGUGG-CG-AU-AGC--G-A-A-GAGG-U-CACAC-CCG-UUC--C--CAUA-CCGAA-CACGGA-A----GUUAAG-CUCUUC-AGCG-CCG-AUG-GU-AGU-CGGGGG------UUU---CC-CCC--UGUG--AGAGUAGG-ACG--CCGCCAA-GC-----------------------------------------------

>Accession:AF267889::SeqID:33547::TaxID:2
-------------------------------------------------------------------------------------------------------------------------UU-UGGUGA-UG-AU-GGC--A-G-A-GAGG-U-CACAC-CCG-UUC--C--CAUA-CCGAA-CACGGA-A----GUUAAG-CUCUCU-AGCG-CCG-AUG-GU-AGU-UGGGAC------CUU---GU-CCC--UGUG--AGAGUAGG-ACG--CCGCC----------------------------------------------------

>Accession:AF267890::SeqID:33548::TaxID:2
-------------------------------------------------------------------------------------------------------------------------UU-UGGUGA-UG-AU-GGC--A-G-A-GAGG-U-CACAC-CCG-UUC--C--CAUA-CCGAA-CACGGA-A----GUUAAG-CUCUCU-AGCG-CCG-AUG-GU-AGU-UGGGAC------CUU---GU-CCC--UGUG--AGAGUAGG-ACG--CCGCC----------------------------------------------------

>Accession:AF267891::SeqID:33549::TaxID:2
-------------------------------------------------------------------------------------------------------------------------UU-UGGUGA-UG-AU-GGC--A-G-A-GAGG-U-CACAC-CCG-UUC--C--CAUA-CCGAA-CACGGA-A----GUUAAG-CUCUCU-AGCG-CCG-AUG-GU-AGU-UGGGAC------CUU---GU-CCC--UGUG--AGAGUAGG-ACG--CCGCC----------------------------------------------------

>Accession:AE017355::SeqID:33637::TaxID:2
----------------------------------------------------------------------------------------------------------------------------UGGUAA-UG-AU-GGC--A-G-A-GAGG-U-CACAC-CCG-UUC--C--CAUA-CCGAA-CACGGA-A----GUUAAG-CUCUCU-AGCG-CCG-AUG-GU-AGU-UGGGAC------CUU---GU-CCC--UGUG--AGAGUAGG-ACG--UUGCCAG-GC-----------------------------------------------

>Accession:AE017355::SeqID:33638::TaxID:2
----------------------------------------------------------------------------------------------------------------------------UGGUAA-UG-AU-GGC--A-G-A-GAGG-C-CACAC-CCG-UUC--C--CAUA-CCGAA-CACGGA-A----GUUAAG-CUCUCU-AGCG-CCG-AUG-GU-AGU-UGGGAC------CUU---GU-CCC--UGUG--AGAGUAGG-ACG--UUGCCAG-GC-----------------------------------------------

>Accession:AE017355::SeqID:33639::TaxID:2
----------------------------------------------------------------------------------------------------------------------------UGGUAA-UG-AU-GGC--A-G-A-GAGG-C-CACAC-CCG-UUC--C--CAUA-CCGAA-CACGGA-A----GUUAAG-CUCUCU-AGCG-CCG-AUG-GU-AGU-UGGGAC------CUU---GU-CCC--UGUG--AGAGUAGG-ACG--UUGCCAG-GC-----------------------------------------------

>Accession:AE017355::SeqID:33640::TaxID:2
----------------------------------------------------------------------------------------------------------------------------UGGUAA-UG-AU-GGC--A-G-A-GAGG-U-CACAC-CCG-UUC--C--CAUA-CCGAA-CACGGA-A----GUUAAG-CUCUCU-AGCG-CCG-AUG-GU-AGU-UGGGAC------CUU---GU-CCC--UGUG--AGAGUAGG-ACG--UUGCCAG-GC-----------------------------------------------

>Accession:AE017355::SeqID:33641::TaxID:2
----------------------------------------------------------------------------------------------------------------------------UGGUAA-UG-AU-GGC--A-G-A-GAGG-U-CACAC-CCG-UUC--C--CAUA-CCGAA-CACGGA-A----GUUAAG-CUCUCU-AGCG-CCG-AUG-GU-AGU-UGGGAC------CUU---GU-CCC--UGUG--AGAGUAGG-ACG--UUGCCAG-GC-----------------------------------------------

>Accession:AE017355::SeqID:33642::TaxID:2
--------------------------------------------------------------------------------------------------------------------------U-UGGUGA-UG-AU-GGC--A-G-A-GAGG-U-CACAC-CCG-UUC--C--CAUA-CCGAA-CACGGA-A----GUUAAG-CUCUCU-AGCG-CCG-AUG-GU-AGU-UGGGAC------CUU---GU-CCC--UGUG--AGAGUAGG-ACG--UCGCCAA-GCAAA--------------------------------------------

>Accession:AE017355::SeqID:33643::TaxID:2
--------------------------------------------------------------------------------------------------------------------------U-UGGUGA-UG-AU-GGC--A-G-A-GAGG-U-CACAC-CCG-UUC--C--CAUA-CCGAA-CACGGA-A----GUUAAG-CUCUCU-AGCG-CCG-AUG-GU-AGU-UGGGAC------CUU---GU-CCC--UGUG--AGAGUAGG-ACG--UCGCCAA-GCAAC--------------------------------------------

>Accession:AE017355::SeqID:33644::TaxID:2
--------------------------------------------------------------------------------------------------------------------------U-UGGUGA-UG-AU-GGC--A-G-A-GAGG-U-CACAC-CCG-UUC--C--CAUA-CCGAA-CACGGA-A----GUUAAG-CUCUCU-AGCG-CCG-AUG-GU-AGU-UGGGAC------CUU---GU-CCC--UGUG--AGAGUAGG-ACG--UCGCCAA-GCAAC--------------------------------------------

>Accession:AE017355::SeqID:33645::TaxID:2
--------------------------------------------------------------------------------------------------------------------------U-UGGUGA-UG-AU-GGC--A-G-A-GAGG-U-CACAC-CCG-UUC--C--CAUA-CCGAA-CACGGA-A----GUUAAG-CUCUCU-AGCG-CCG-AUG-GU-AGU-UGGGAC------CUU---GU-CCC--UGUG--AGAGUAGG-ACG--UCGCCAA-GCAAC--------------------------------------------

>Accession:AE017355::SeqID:33646::TaxID:2
--------------------------------------------------------------------------------------------------------------------------U-UGGUGA-UG-AU-GGC--A-G-A-GAGG-U-CACAC-CCG-UUC--C--CAUA-CCGAA-CACGGA-A----GUUAAG-CUCUCU-AGCG-CCG-AUG-GU-AGU-UGGGAC------CUU---GU-CCC--UGUG--AGAGUAGG-ACG--UCGCCAA-GCUAU--------------------------------------------

>Accession:AE017355::SeqID:33647::TaxID:2
--------------------------------------------------------------------------------------------------------------------------U-UGGUGA-UG-AU-GGC--A-G-A-GAGG-U-CACAC-CCG-UUC--C--CAUA-CCGAA-CACGGA-A----GUUAAG-CUCUCU-AGCG-CCG-AUG-GU-AGU-UGGGAC------CUU---GU-CCC--UGUG--AGAGUAGG-ACG--UCGCCAA-GCAAG--------------------------------------------

>Accession:AE017355::SeqID:33648::TaxID:2
--------------------------------------------------------------------------------------------------------------------------U-UGGUGA-UG-AU-GGC--A-G-A-GAGG-U-CACAC-CCG-UUC--C--CAUA-CCGAA-CACGGA-A----GUUAAG-CUCUCU-AGCG-CCG-AUG-GU-AGU-UGGGAC------CUU---GU-CCC--UGUG--AGAGUAGG-ACG--UCGCCAA-GCAAG--------------------------------------------

>Accession:AE017355::SeqID:33649::TaxID:2
--------------------------------------------------------------------------------------------------------------------------U-UGGUGA-UG-AU-GGC--A-G-A-GAGG-U-CACAC-CCG-UUC--C--CAUA-CCGAA-CACGGA-A----GUUAAG-CUCUCU-AGCG-CCG-AUG-GU-AGU-UGGGAC------CUU---GU-CCC--UGUG--AGAGUAGG-ACG--UCGCCAA-GCAAC--------------------------------------------

>Accession:CR626927::SeqID:33785::TaxID:2
---------------------------------------------------------------------------------------------------------------------------------A-UU-AU-AGC--A-C-A-AGGG-U-UCCAC-CUC-UUC--C--CAUU-CCGAA-CAGAGA-A----GUUAAG-CCUUGU-CACG-CCG-AUG-GU-ACU-GC------A--UAAUA-------G--UGGG--AGAGUAGG-UAG--UCGCCAG-CUUuuuauuag--------------------------------------

>Accession:CR626927::SeqID:33786::TaxID:2
---------------------------------------------------------------------------------------------------------------------------------A-CU-AU-AGC--A-U-C-AGGG-U-UCCAC-CUC-UUC--C--CAUU-CCGAA-CAGAGA-A----GUUAAG-CCUGAU-CACG-CCG-AUG-GU-ACU-GC------G--UAACA-------G--UGGG--AGAGUAGG-UAG--UCGCCGU-UUUuuucagaugguucauccccuucggucgaaagaccggaggggaugac

>Accession:CR626927::SeqID:33787::TaxID:2
---------------------------------------------------------------------------------------------------------------------------------A-CU-AU-AGC--A-U-C-AGGG-U-UCCAC-CUC-UUC--C--CAUU-CCGAA-CAGAGA-A----GUUAAG-CCUGAU-CACG-CCG-AUG-GU-ACU-GC------G--UAACA-------G--UGGG--AGAGUAGG-UAG--UCGCCGU-UUUuuucagaugguucauccccuucggucgaaagaccggaggggaugac

>Accession:CR626927::SeqID:33788::TaxID:2
---------------------------------------------------------------------------------------------------------------------------------A-CU-AU-AGC--A-U-C-AGGG-U-UCCAC-CUC-UUC--C--CAUU-CCGAA-CAGAGA-A----GUUAAG-CCUGAU-CACG-CCG-AUG-GU-ACU-GC------G--UAACA-------G--UGGG--AGAGUAGG-UAG--UCGCCAU-UUUuuucagaugguucauccccuucggucgaaagaccggaggggaugac

>Accession:CR626927::SeqID:33789::TaxID:2
---------------------------------------------------------------------------------------------------------------------------------A-CU-AU-AGC--A-U-C-AGGG-U-UCCAC-CUC-UUC--C--CAUU-CCGAA-CAGAGA-A----GUUAAG-CCUGAU-CACG-CCG-AUG-GU-ACU-GC------G--UAACA-------G--UGGG--AGAGUAGG-UAG--UCGCCAU-UUUuuucagaugguucauccccuucggucgaaagaccggaggggaugac

>Accession:CR626927::SeqID:33790::TaxID:2
---------------------------------------------------------------------------------------------------------------------------------A-CU-AU-AGC--A-U-C-AGGG-U-UCCAC-CUC-UUC--C--CAUU-CCGAA-CAGAGA-A----GUUAAG-CCUGAU-CACG-CCG-AUG-GU-ACU-GC------G--UAACA-------G--UGGG--AGAGUAGG-UAG--UCGCCGU-UUUuuucagaugguucauccccuccggucgaaagaccggaggggaugac

>Accession:CR626927::SeqID:33791::TaxID:2
---------------------------------------------------------------------------------------------------------------------------------A-CU-AU-AGC--A-U-C-AGGG-U-UCCAC-CUC-UUC--C--CAUU-CCGAA-CAGAGA-A----GUUAAG-CCUGAU-CACG-CCG-AUG-GU-ACU-GC------G--UAACA-------G--UGGG--AGAGUAGG-UAG--UCGCCGU-UUUuuucagaugguucauccccuucggucgaaagaucggaggggaugac

>Accession:AP006841::SeqID:33804::TaxID:2
-----------------------------------------------------------------------------------------------------------------------------GGUGA-CU-AU-AGC--A-U-C-AGGG-U-UCCAC-CUC-UUC--C--CAUU-CCGAA-CAGAGA-A----GUUAAG-CCUGAU-CACG-CCG-AUG-GU-ACU-GC------G--UAACA-------G--UGGG--AGAGUAGG-UAG--UCGCCGU-UUU----------------------------------------------

>Accession:AP006841::SeqID:33805::TaxID:2
-----------------------------------------------------------------------------------------------------------------------------GGUGA-CU-AU-AGC--A-U-C-AGGG-U-UCCAC-CUC-UUC--C--CAUU-CCGAA-CAGAGA-A----GUUAAG-CCUGAU-CACG-CCG-AUG-GU-ACU-GC------G--UAACA-------G--UGGG--AGAGUAGG-UAG--UCGCCGU-UUU----------------------------------------------

>Accession:AP006841::SeqID:33806::TaxID:2
-----------------------------------------------------------------------------------------------------------------------------GGUGA-CU-AU-AGC--A-U-C-AGGG-U-UCCAC-CUC-UUC--C--CAUU-CCGAA-CAGAGA-A----GUUAAG-CCUGAU-CACG-CCG-AUG-GU-ACU-GC------G--UAACA-------G--UGGG--AGAGUAGG-UAG--UCGCCGU-UUU----------------------------------------------

>Accession:AP006841::SeqID:33807::TaxID:2
-----------------------------------------------------------------------------------------------------------------------------GGUGA-CU-AU-AGC--A-U-C-AGGG-U-UCCAC-CUC-UUC--C--CAUU-CCGAA-CAGAGA-A----GUUAAG-CCUGAU-CACG-CCG-AUG-GU-ACU-GC------G--UAACA-------G--UGGG--AGAGUAGG-UAG--UCGCCGU-UUU----------------------------------------------

>Accession:AP006841::SeqID:33808::TaxID:2
-----------------------------------------------------------------------------------------------------------------------------GGUGA-CU-AU-AGC--A-U-C-AGGG-U-UCCAC-CUC-UUC--C--CAUU-CCGAA-CAGAGA-A----GUUAAG-CCUGAU-CACG-CCG-AUG-GU-ACU-GC------G--UAACA-------G--UGGG--AGAGUAGG-UAG--UCGCCGU-UUU----------------------------------------------

>Accession:AP006841::SeqID:33809::TaxID:2
-----------------------------------------------------------------------------------------------------------------------------GGUGA-CU-AU-AGC--A-U-C-AGGG-U-UCCAC-CUC-UUC--C--CAUU-CCGAA-CAGAGA-A----GUUAAG-CCUGAU-CACG-CCG-AUG-GU-ACU-GC------G--UAACA-------G--UGGG--AGAGUAGG-UAG--UCGCCGU-UUU----------------------------------------------

>Accession:AE016931::SeqID:33931::TaxID:2
----------------------------------------------------------------------------------------------------------------------AU-UC-AGGUGG-UU-AU-AGC--A-C-G-AGGG-U-UCCAC-CUC-UUC--C--CAUU-CCGAA-CAGAGA-A----GUUAAG-CCUCGU-CACG-CCG-AUG-GU-ACU-GC------G--UAACA-------G--UGGG--AGAGUAGG-UAG--CCGCCGU-UUUU---------------------------------------------

>Accession:AE016933::SeqID:33932::TaxID:2
----------------------------------------------------------------------------------------------------------------------AU-UC-AGGUGG-UU-AU-AGC--A-C-G-AGGG-U-UCCAC-CUC-UUC--C--CAUU-CCGAA-CAGAGA-A----GUUAAG-CCUCGU-CACG-CCG-AUG-GU-ACU-GC------G--UAACA-------G--UGGG--AGAGUAGG-UAG--CCGCCAU-UUUU---------------------------------------------

>Accession:AE016936::SeqID:33933::TaxID:2
----------------------------------------------------------------------------------------------------------------------AU-UC-AGGUGG-UU-AU-AGC--A-C-G-AGGG-U-UCCAC-CUC-UUC--C--CAUU-CCGAA-CAGAGA-A----GUUAAG-CCUCGU-CACG-CCG-AUG-GU-ACU-GC------G--UAACA-------G--UGGG--AGAGUAGG-UAG--CCGCCAU-UUUU---------------------------------------------

>Accession:AE016937::SeqID:33934::TaxID:2
----------------------------------------------------------------------------------------------------------------------AU-UC-AGGUGG-UU-AU-AGC--A-C-G-AGGG-U-UCCAC-CUC-UUC--C--CAUU-CCGAA-CAGAGA-A----GUUAAG-CCUCGU-CACG-CCG-AUG-GU-ACU-GC------G--UAACA-------G--UGGG--AGAGUAGG-UAG--CCGCCAU-UUUU---------------------------------------------

>Accession:AE016942::SeqID:33935::TaxID:2
----------------------------------------------------------------------------------------------------------------------AU-UC-AGGUGG-UU-AU-AGC--A-C-G-AGGG-U-UCCAC-CUC-UUC--C--CAUU-CCGAA-CAGAGA-A----GUUAAG-CCUCGU-CACG-CCG-AUG-GU-ACU-GC------G--UAACA-------G--UGGG--AGAGUAGG-UAG--CCGCCGU-UUUU---------------------------------------------

>Accession:AE015928::SeqID:33936::TaxID:2
-------------------------------------------------------------------------------------------------------------------------------------------------------------CAC-CUC-UUC--C--CAUU-CCGAA-CAGAGA-A----GUUAAG-CC--------------------------------------------------------------------------------------------------------------------------------

>Accession:AE015928::SeqID:33937::TaxID:2
-------------------------------------------------------------------------------------------------------------------------------------------------------------CAC-CUC-UUC--C--CAUU-CCGAA-CAGAGA-A----GUUAAG-CC--------------------------------------------------------------------------------------------------------------------------------

>Accession:AE015928::SeqID:33938::TaxID:2
-------------------------------------------------------------------------------------------------------------------------------------------------------------CAC-CUC-UUC--C--CAUU-CCGAA-CAGAGA-A----GUUAAG-CC--------------------------------------------------------------------------------------------------------------------------------

>Accession:AE015928::SeqID:33939::TaxID:2
-------------------------------------------------------------------------------------------------------------------------------------------------------------CAC-CUC-UUC--C--CAUU-CCGAA-CAGAGA-A----GUUAAG-CC--------------------------------------------------------------------------------------------------------------------------------

>Accession:AE015928::SeqID:33940::TaxID:2
-------------------------------------------------------------------------------------------------------------------------------------------------------------CAC-CUC-UUC--C--CAUU-CCGAA-CAGAGA-A----GUUAAG-CC--------------------------------------------------------------------------------------------------------------------------------

>Accession:L08503::SeqID:34973::TaxID:2
----------------------------------------------------------------------------------------------------------------------GA-CU-UGGUGG-UU-AU-GGC--G-G-A-ACGC-C-UGCAC-CCG-AUC--C--CAUC-CCGAA-CUCGGC-C----GUGAAA-CGUUCC-AGCG-CUG-AUG-GU-ACU-UUGUC-------UUAA---G-GCA--CGGG--AGAGUAAG-UCG--CUGCCAG-GUCU---------------------------------------------

>Accession:BX897699::SeqID:34992::TaxID:2
----------------------------------------------------------------------------------------------------------------------GA-CU-UGGUGG-UU-AU-GGC--G-G-A-GUGA-A-CGCAC-CCG-AUC--C--CAUC-CCGAA-CUCGGC-C----GUGAAA-CGCUCC-AGCG-CUG-AUG-GU-ACU-UUGCC-------UUAA---G-GCA--CGGG--AGAGUAAG-UCG--CUGCCAG-GUCU---------------------------------------------

>Accession:BX897699::SeqID:34993::TaxID:2
----------------------------------------------------------------------------------------------------------------------GA-CU-UGGUGG-UU-AU-GGC--G-G-A-GUGA-A-CGCAC-CCG-AUC--C--CAUC-CCGAA-CUCGGC-C----GUGAAA-CGCUCC-AGCG-CUG-AUG-GU-ACU-UUGCC-------UUAA---G-GCA--CGGG--AGAGUAAG-UCG--CUGCCAG-GUCU---------------------------------------------

>Accession:BX897699::SeqID:34994::TaxID:2
----------------------------------------------------------------------------------------------------------------------GA-CU-UGGUGG-UU-AU-GGC--G-G-A-GUGA-A-CGCAC-CCG-AUC--C--CAUC-CCGAA-CUCGGC-C----GUGAAA-CGCUCC-AGCG-CUG-AUG-GU-ACU-UUGCC-------UUAA---G-GCA--CGGG--AGAGUAAG-UCG--CUGCCAG-GUCU---------------------------------------------

>Accession:BX897700::SeqID:35005::TaxID:2
----------------------------------------------------------------------------------------------------------------------GA-CU-UGGUGG-UU-AU-GGC--G-G-A-GCGA-A-CGCAC-CCG-AUC--C--CAUC-CCGAA-CUCGGC-C----GUGAAA-CGUUCC-AGCG-CUG-AUG-GU-ACU-UUGCC-------UUAA---G-GCA--CGGG--AGAGUAAG-UCG--CUGCCAG-GUCU---------------------------------------------

>Accession:BX897700::SeqID:35006::TaxID:2
----------------------------------------------------------------------------------------------------------------------GA-CU-UGGUGG-UU-AU-GGC--G-G-A-GCGA-A-CGCAC-CCG-AUC--C--CAUC-CCGAA-CUCGGC-C----GUGAAA-CGUUCC-AGCG-CUG-AUG-GU-ACU-UUGCC-------UUAA---G-GCA--CGGG--AGAGUAAG-UCG--CUGCCAG-GUCU---------------------------------------------

>Accession:M35565::SeqID:35707::TaxID:2
----------------------------------------------------------------------------------------------------------------------UU-CU-UGGCGA-CC-AU-AGC--A-A-A-UAGG-A-ACCAC-CCG-ACC--C--CAUC-CCGAA-CUCGGU-A----GUGAAA-CUGUUC-UGCG-CCG-AUG-AU-AGU-GUGGAU------ACU---CU-CCA--UGUG--AAAGUAGG-UUA--UCGCCAA-GAGC---------------------------------------------

>Accession:AE014295::SeqID:37226::TaxID:2
----------------------------------------------------------------------------------------------------------------------UU-UG-CGGCGG-CC-AU-GGC--C-C-A-GGUG-A-GACGC-CCG-GUC--C--CAUU-CCGAA-CCCGGA-A----GCUAAG-GCCUGG-CACG-GCG-AUG-GU-ACU-GCACCC------GACA--GG-GUG--UGGG--AGAGUAGC-ACG--CCGCCGC-AUC----------------------------------------------

>Accession:AE014295::SeqID:37227::TaxID:2
----------------------------------------------------------------------------------------------------------------------UU-UG-CGGCGG-CC-AU-GGC--C-C-A-GGUG-A-GACGC-CCG-GUC--C--CAUU-CCGAA-CCCGGA-A----GCUAAG-GCCUGG-CACG-GCG-AUG-GU-ACU-GCACCC------GACA--GG-GUG--UGGG--AGAGUAGC-ACG--CCGCCGC-AUC----------------------------------------------

>Accession:AE014295::SeqID:37228::TaxID:2
----------------------------------------------------------------------------------------------------------------------UU-UG-CGGCGG-CC-AU-GGC--C-C-A-GGUG-A-GACGC-CCG-GUC--C--CAUU-CCGAA-CCCGGA-A----GCUAAG-GCCUGG-CACG-GCG-AUG-GU-ACU-GCACCC------GACA--GG-GUG--UGGG--AGAGUAGC-ACG--CCGCCGC-ACC----------------------------------------------

>Accession:AE014295::SeqID:37229::TaxID:2
----------------------------------------------------------------------------------------------------------------------UU-UG-CGGCGG-CC-AU-GGC--C-C-A-GGUG-A-GACGC-CCG-GUC--C--CAUU-CCGAA-CCCGGA-A----GCUAAG-GCCUGG-CACG-GCG-AUG-GU-ACU-GCACCC------GACA--GG-GUG--UGGG--AGAGUAGC-ACG--CCGCCGC-AUCA---------------------------------------------

>Accession:BX640442::SeqID:39925::TaxID:2
-----------------------------------------------------------------------------------------------------------------------G-CC-UGACGA-CC-AU-AGC--A-A-G-GUGG-U-CCCAC-UCC-UUC--C--CAUC-CCGAA-CAGGAC-A----GUGAAA-CGCCUU-CGCG-CCG-AUG-AU-AGU-GGAU--------GUAC-----AUC--UGUG--AAAGUAGG-UCA--UCGUCAG-GCU----------------------------------------------

>Accession:BX640447::SeqID:39926::TaxID:2
-----------------------------------------------------------------------------------------------------------------------G-CC-UGACGA-CC-AU-AGC--A-A-G-GUGG-U-CCCAC-UCC-UUC--C--CAUC-CCGAA-CAGGAC-A----GUGAAA-CGCCUU-CGCG-CCG-AUG-AU-AGU-GGAU--------GUAC-----AUC--UGUG--AAAGUAGG-UCA--UCGUCAG-GCU----------------------------------------------

>Accession:BX640449::SeqID:39927::TaxID:2
-----------------------------------------------------------------------------------------------------------------------G-CC-UGACGA-CC-AU-AGC--A-A-G-GUGG-U-CCCAC-UCC-UUC--C--CAUC-CCGAA-CAGGAC-A----GUGAAA-CGCCUU-CGCG-CCG-AUG-AU-AGU-GGAU--------GUAC-----AUC--UGUG--AAAGUAGG-UCA--UCGUCAG-GCU----------------------------------------------

>Accession:BX640428::SeqID:39943::TaxID:2
-----------------------------------------------------------------------------------------------------------------------G-CC-UGACGA-CC-AU-AGC--A-A-G-GUGG-U-CCCAC-UCC-UUC--C--CAUC-CCGAA-CAGGAC-A----GUGAAA-CGCCUU-CGCG-CCG-AUG-AU-AGU-GGAU--------GUAC-----AUC--UGUG--AAAGUAGG-UCA--UCGUCAG-GCU----------------------------------------------

>Accession:BX640430::SeqID:39944::TaxID:2
-----------------------------------------------------------------------------------------------------------------------G-CC-UGACGA-CC-AU-AGC--A-A-G-GUGG-U-CCCAC-UCC-UUC--C--CAUC-CCGAA-CAGGAC-A----GUGAAA-CGCCUU-CGCG-CCG-AUG-AU-AGU-GGAU--------GUAC-----AUC--UGUG--AAAGUAGG-UCA--UCGUCAG-GCU----------------------------------------------

>Accession:BX640434::SeqID:39945::TaxID:2
-----------------------------------------------------------------------------------------------------------------------G-CC-UGACGA-CC-AU-AGC--A-A-G-GUGG-U-CCCAC-UCC-UUC--C--CAUC-CCGAA-CAGGAC-A----GUGAAA-CGCCUU-CGCG-CCG-AUG-AU-AGU-GGAU--------GUAC-----AUC--UGUG--AAAGUAGG-UCA--UCGUCAG-GCU----------------------------------------------

>Accession:BX640417::SeqID:39954::TaxID:2
-----------------------------------------------------------------------------------------------------------------------G-CC-UGACGA-CC-AU-AGC--A-A-G-GUGG-U-CCCAC-UCC-UUC--C--CAUC-CCGAA-CAGGAC-A----GUGAAA-CGCCUU-CGCG-CCG-AUG-AU-AGU-GGAU--------GUAC-----AUC--UGUG--AAAGUAGG-UCA--UCGUCAG-GCU----------------------------------------------

>Accession:BX640418::SeqID:39955::TaxID:2
-----------------------------------------------------------------------------------------------------------------------G-CC-UGACGA-CC-AU-AGC--A-A-G-GUGG-U-CCCAC-UCC-UUC--C--CAUC-CCGAA-CAGGAC-A----GUGAAA-CGCCUU-CGCG-CCG-AUG-AU-AGU-GGAU--------GUAC-----AUC--UGUG--AAAGUAGG-UCA--UCGUCAG-GCU----------------------------------------------

>Accession:BX640420::SeqID:39956::TaxID:2
-----------------------------------------------------------------------------------------------------------------------G-CC-UGACGA-CC-AU-AGC--A-A-G-GUGG-U-CCCAC-UCC-UUC--C--CAUC-CCGAA-CAGGAC-A----GUGAAA-CGCCUU-CGCG-CCG-AUG-AU-AGU-GGAU--------GUAC-----AUC--UGUG--AAAGUAGG-UCA--UCGUCAG-GCU----------------------------------------------

>Accession:X57791::SeqID:40037::TaxID:2
----------------------------------------------------------------------------------------------------------------------CC-CU-GGUGGU-UA-A--AGA--A-A-A-GAGG-A-AACAC-CUG-UUA--U--CAUU-CCGAA-CACAGA-A----GUUAAG-CUCUUA-UUCG-CUG-AUG-GU-ACU-GCG---------AGUU------CG--CGGG--AGAGUAGG--UU--AUUGCCA-GGG----------------------------------------------

>Accession:AE001147::SeqID:40038::TaxID:2
----------------------------------------------------------------------------------------------------------------------CC-CU-GGUGGU-UA-A--AGA--A-A-A-GAGG-A-AACAC-CUG-UUA--U--CAUU-CCGAA-CACAGA-A----GUUAAG-CUCUUA-UUCG-CUG-AUG-GU-ACU-GCG---------AGUU------CG--CGGG--AGAGUAGG--UU--AUUGCCA-GGG----------------------------------------------

>Accession:AE000783::SeqID:40095::TaxID:2
----------------------------------------------------------------------------------------------------------------------CC-CU-GGUGGU-UA-A--AGA--A-A-A-GAGG-A-AACAC-CUG-UUA--U--CAUU-CCGAA-CACAGA-A----GUUAAG-CUCUUA-UUCG-CUG-AUG-GU-ACU-GCG---------AGUU------CG--CGGG--AGAGUAGG--UU--AUUGCCA-GGG----------------------------------------------

>Accession:AE000783::SeqID:40096::TaxID:2
----------------------------------------------------------------------------------------------------------------------CC-CU-GGUGGU-UA-A--AGA--A-A-A-GAGG-A-AACAC-CUG-UUA--U--CAUU-CCGAA-CACAGA-A----GUUAAG-CUCUUA-UUCG-CUG-AUG-GU-ACU-GCG---------AGUU------CG--CGGG--AGAGUAGG--UU--AUUGCCA-GGG----------------------------------------------

>Accession:CP000013::SeqID:40135::TaxID:2
----------------------------------------------------------------------------------------------------------------------CC-CU-GGUGGU-UA-A--AGA--A-A-A-GAGG-A-AACAC-CUG-UUA--U--CAUU-CCGAA-CACAGA-A----GUUAAG-CUCUUA-UUCG-CUG-AUG-GU-ACU-GCG---------AGUU------CG--CGGG--AGAGUAAG--CU--AUUGCCA-GGG----------------------------------------------

>Accession:CP000013::SeqID:40136::TaxID:2
----------------------------------------------------------------------------------------------------------------------CC-CU-GGUGGU-UA-A--AGA--A-A-A-GAGG-A-AACAC-CUG-UUA--U--CAUU-CCGAA-CACAGA-A----GUUAAG-CUCUUA-UUCG-CUG-AUG-GU-ACU-GCG---------AGUU------CG--CGGG--AGAGUAAG--CU--AUUGCCA-GGG----------------------------------------------

>Accession:AP005940::SeqID:42777::TaxID:2
----------------------------------------------------------------------------------------------------------------------GG-CC-UGGUGG-UU-UU-AGC--G-A-A-GAGC-C-UCAAC-CCG-AUC--C--CAUC-CCGAA-CUCGGC-C----GUUAAA-CUCUUC-AGCG-CCA-AUG-GU-ACU-AUGGC-------UUAA---G-CCC--UGGG--AGAGUAGG-UCG--CUGCCAG-GCCU---------------------------------------------

>Accession:Z35330::SeqID:42778::TaxID:2
----------------------------------------------------------------------------------------------------------------------GG-CC-UGGUGG-UU-UU-AGC--G-A-A-GAGC-C-UCAAC-CCG-AUC--C--CAUC-CCGAA-CUCGGC-C----GUUAAA-CUCUUC-AGCG-CCA-AUG-GU-ACU-AUGGC-------UUAA---G-CCC--UGGG--AGAGUAGG-UCG--CUGCCAG-GCCU---------------------------------------------

>Accession:BA000040::SeqID:42855::TaxID:2
----------------------------------------------------------------------------------------------------------------------GG-CC-UGGUGG-UU-UU-AGC--G-A-A-GAGC-C-UCAAC-CCG-AUC--C--CAUC-CCGAA-CUCGGC-C----GUUAAA-CUCUUC-AGCG-CCA-AUG-GU-ACU-AUGGC-------UUAA---G-CCC--UGGG--AGAGUAGG-UCG--CUGCCAG-GCCU---------------------------------------------

>Accession:X02028::SeqID:43955::TaxID:2
-------------------------------------------------------------------------------------------------------------------------UC-UGGUGA-UG-AU-GGC--G-G-A-GGGG-A-CACAC-CCG-UUC--C--CAUA-CCGAA-CACGGC-C----GUUAAG-CCCUCC-AGCG-CCA-AUG-GU-ACU-UGCUCC------GCAG--GG-AGC--CGGG--AGAGUAGG-ACG--UCGCCAG-GC-----------------------------------------------

>Accession:X55264::SeqID:44077::TaxID:2
---------------------------------------------------------------------------------------------------------------------UUU-UG-CGGUGG-UG-AU-AGU--G-G-U-GGGG-A-AACGC-CCG-GUU--AACCGUU-CCGAU-CCCGGU-A----GCUAAG-CCCAUG-UAUG-CUG-AUG-GU-ACU-GCAACU------UGGU--GG-UUG--UGGG--AGAGUAAG-UGA--CUGCCGC-AAU----------------------------------------------

>Accession:X08003::SeqID:44088::TaxID:2
-----------------------------------------------------------------------------------------------------------------------A-UUACGGCGG-UC-AU-AGC--G-U-G-GGGG-A-AACGC-CCG-GUC--C--CAUU-CCGAA-CCCGGA-A----GCUAAG-ACCCAC-AGCG-CCG-AUG-GU-ACU-GCACCC------GGGA--GG-GUG--UGGG--AGAGUAGG-UCA--CCGCCGG-AAA----------------------------------------------

>Accession:X55256::SeqID:44092::TaxID:2
---------------------------------------------------------------------------------------------------------------------UUU-UG-CGGUGG-UG-AU-AGU--G-G-U-GGGG-A-AACGC-CCG-GUU--AACCGUU-CCGAU-CCCGGU-A----GCUAAG-CCCAUU-CGCG-CUG-AUG-GU-ACU-GCAACU------UGGU--GG-UUG--UGGG--AGAGUAGG-UGA--CUGCCGC-AAU----------------------------------------------

>Accession:AE017223::SeqID:44617::TaxID:2
----------------------------------------------------------------------------------------------------------------------GA-CC-UGGUGG-UU-AU-GGC--G-G-A-GCGG-C-UGCAC-CCG-AUC--C--CAUU-CCGAA-CUCGGC-C----GUGAAA-CGCUCC-AGCG-CCA-AUG-GU-ACU-UCGUC-------UCAA---G-ACG--CGGG--AGAGUAGG-UCG--CUGCCAG-GUCU---------------------------------------------

>Accession:AE017223::SeqID:44618::TaxID:2
----------------------------------------------------------------------------------------------------------------------GA-CC-UGGUGG-UU-AU-GGC--G-G-A-GCGG-C-UGCAC-CCG-AUC--C--CAUU-CCGAA-CUCGGC-C----GUGAAA-CGCUCC-AGCG-CCA-AUG-GU-ACU-UCGUC-------UCAA---G-ACG--CGGG--AGAGUAGG-UCG--CUGCCAG-GUCU---------------------------------------------

>Accession:AE017224::SeqID:44619::TaxID:2
----------------------------------------------------------------------------------------------------------------------GA-CC-UGGUGG-UU-AU-GGC--G-G-A-GCGG-C-UGCAC-CCG-AUC--C--CAUU-CCGAA-CUCGGC-C----GUGAAA-CGCUCC-AGCG-CCA-AUG-GU-ACU-UCGUC-------UCAA---G-ACG--CGGG--AGAGUAGG-UCG--CUGCCAG-GUCU---------------------------------------------

>Accession:AF220147::SeqID:44629::TaxID:2
----------------------------------------------------------------------------------------------------------------------GA-CC-UGGUGG-UU-AU-GGC--G-G-A-GCGG-C-UGCAC-CCG-AUC--C--CAUU-CCGAA-CUCGGC-C----GUGAAA-CGCUCC-AGCG-CCA-AUG-GU-ACU-UCGUC-------UCAA---G-ACG--CGGG--AGAGUAGG-UCG--CUGCCAG-GUCU---------------------------------------------

>Accession:AF220148::SeqID:44630::TaxID:2
----------------------------------------------------------------------------------------------------------------------GA-CC-UGGUGG-UU-AU-GGC--G-G-A-GCGG-C-UGCAC-CCG-AUC--C--CAUU-CCGAA-CUCGGC-C----GUGAAA-CGCUCC-AGCG-CCA-AUG-GU-ACU-UCGUC-------UCAA---G-ACG--CGGG--AGAGUAGG-UCG--CUGCCAG-GUCU---------------------------------------------

>Accession:AF220149::SeqID:44631::TaxID:2
----------------------------------------------------------------------------------------------------------------------GA-CC-UGGUGG-UU-AU-GGC--G-G-A-GCGG-C-UGCAC-CCG-AUC--C--CAUU-CCGAA-CUCGGC-C----GUGAAA-CGCUCC-AGCG-CCA-AUG-GU-ACU-UCGUC-------UCAA---G-ACG--CGGG--AGAGUAGG-UCG--CUGCCAG-GUCU---------------------------------------------

>Accession:AE009462::SeqID:44680::TaxID:2
---------------------------------------------------------------------------------------------------------------------CGA-CC-UGGUGG-UU-AU-GGC--G-G-A-GCGG-C-UGCAC-CCG-AUC--C--CAUU-CCGAA-CUCGGC-C----GUGAAA-CGCUCC-AGCG-CCA-AUG-GU-ACU-UCGUC-------UCAA---G-ACG--CGGG--AGaGUAGG-UCG--CUGCCAG-GUC----------------------------------------------

>Accession:AE009481::SeqID:44681::TaxID:2
---------------------------------------------------------------------------------------------------------------------CGA-CC-UGGUGG-UU-AU-GGC--G-G-A-GCGG-C-UGCAC-CCG-AUC--C--CAUU-CCGAA-CUCGGC-C----GUGAAA-CGCUCC-AGCG-CCA-AUG-GU-ACU-UCGUC-------UCAA---G-ACG--CGGG--AGaGUAGG-UCG--CUGCCAG-GUC----------------------------------------------

>Accession:AE009657::SeqID:44682::TaxID:2
---------------------------------------------------------------------------------------------------------------------CGA-CC-UGGUGG-UU-AU-GGC--G-G-A-GCGG-C-UGCAC-CCG-AUC--C--CAUU-CCGAA-CUCGGC-C----GUGAAA-CGCUCC-AGCG-CCA-AUG-GU-ACU-UCGUC-------UCAA---G-ACG--CGGG--AGaGUAGG-UCG--CUGCCAG-GUC----------------------------------------------

>Accession:NC_003317::SeqID:44683::TaxID:2
---------------------------------------------------------------------------------------------------------------------CGA-CC-UGGUGG-UU-AU-GGC--G-G-A-GCGG-C-UGCAC-CCG-AUC--C--CAUU-CCGAA-CUCGGC-C----GUGAAA-CGCUCC-AGCG-CCA-AUG-GU-ACU-UCGUC-------UCAA---G-ACG--CGGG--AGAGUAGG-UCG--CUGCCAG-GUC----------------------------------------------

>Accession:NC_003317::SeqID:44684::TaxID:2
---------------------------------------------------------------------------------------------------------------------CGA-CC-UGGUGG-UU-AU-GGC--G-G-A-GCGG-C-UGCAC-CCG-AUC--C--CAUU-CCGAA-CUCGGC-C----GUGAAA-CGCUCC-AGCG-CCA-AUG-GU-ACU-UCGUC-------UCAA---G-ACG--CGGG--AGAGUAGG-UCG--CUGCCAG-GUC----------------------------------------------

>Accession:NC_003318::SeqID:44685::TaxID:2
---------------------------------------------------------------------------------------------------------------------CGA-CC-UGGUGG-UU-AU-GGC--G-G-A-GCGG-C-UGCAC-CCG-AUC--C--CAUU-CCGAA-CUCGGC-C----GUGAAA-CGCUCC-AGCG-CCA-AUG-GU-ACU-UCGUC-------UCAA---G-ACG--CGGG--AGAGUAGG-UCG--CUGCCAG-GUC----------------------------------------------

>Accession:AM040264::SeqID:44686::TaxID:2
----------------------------------------------------------------------------------------------------------------------GA-CC-UGGUGG-UU-AU-GGC--G-G-A-GCGG-C-UGCAC-CCG-AUC--C--CAUU-CCGAA-CUCGGC-C----GUGAAA-CGCUCC-AGCG-CCA-AUG-GU-ACU-UCGUC-------UCAA---G-ACG--CGGG--AGAGUAGG-UCG--CUGCCAG-GUCU---------------------------------------------

>Accession:AM040264::SeqID:44687::TaxID:2
----------------------------------------------------------------------------------------------------------------------GA-CC-UGGUGG-UU-AU-GGC--G-G-A-GCGG-C-UGCAC-CCG-AUC--C--CAUU-CCGAA-CUCGGC-C----GUGAAA-CGCUCC-AGCG-CCA-AUG-GU-ACU-UCGUC-------UCAA---G-ACG--CGGG--AGAGUAGG-UCG--CUGCCAG-GUCU---------------------------------------------

>Accession:L12402::SeqID:44688::TaxID:2
----------------------------------------------------------------------------------------------------------------------GA-CC-UGGUGG-UU-AU-GGC--G-G-A-GCGG-C-UGCAC-CCG-AUC--C--CAUU-CCGAA-CUCGGC-C----GUGAAA-CGCUCC-AGCG-CCA-AUG-GU-ACU-UCGUC-------UCAA---G-AGG--AGGC--AGAGUAGG-UCG--AUGCCAG-GUCU---------------------------------------------

>Accession:AM040265::SeqID:44689::TaxID:2
----------------------------------------------------------------------------------------------------------------------GA-CC-UGGUGG-UU-AU-GGC--G-G-A-GCGG-C-UGCAC-CCG-AUC--C--CAUU-CCGAA-CUCGGC-C----GUGAAA-CGCUCC-AGCG-CCA-AUG-GU-ACU-UCGUC-------UCAA---G-ACG--CGGG--AGAGUAGG-UCG--CUGCCAG-GUCUG--------------------------------------------

>Accession:AE014603::SeqID:44759::TaxID:2
----------------------------------------------------------------------------------------------------------------------GA-CC-UGGUGG-UU-AU-GGC--G-G-A-GCGG-C-UGCAC-CCG-AUC--C--CAUU-CCGAA-CUCGGC-C----GUGAAA-CGCUCC-AGCG-CCA-AUG-GU-ACU-UCGUC-------UCAA---G-ACG--CGGG--AGAGUAGG-UCG--CUGCCAG-GUCU---------------------------------------------

>Accession:AE014017::SeqID:45193::TaxID:2
----------------------------------------------------------------------------------------------------------------------------UGGUAA-AA-AU-AGU--G-U-U-AUGG-U-ACCAC-CUG-AAA--C--CAUG-CCGAA-CUCAGA-A----GUGAAA-CAUUUC-AACG-CCG-AUG-GU-AGU-GCAGGG------UAU---CC-CUG--UGUG--AGAGUAGG-ACA--UUACCAG-GUU----------------------------------------------

>Accession:AP001119::SeqID:45199::TaxID:2
----------------------------------------------------------------------------------------------------------------------------UGGUAA-AA-AU-AGU--G-U-A-GUGG-U-ACCAC-CUG-AAU--C--CAUU-CCGAA-CUCAGA-A----GUGAAA-CGCUAU-AACG-CCG-AUG-GU-AGU-ACGGGG------CCU---CC-CCG--UGUG--AGAGUAGG-UCA--AAUCCAG-GAA----------------------------------------------

>Accession:BA000003::SeqID:45200::TaxID:2
----------------------------------------------------------------------------------------------------------------------------UGGUAA-AA-AU-AGU--G-U-A-GUGG-U-ACCAC-CUG-AAU--C--CAUU-CCGAA-CUCAGA-A----GUGAAA-CGCUAU-AACG-CCG-AUG-GU-AGU-ACGGGG------CCU---CC-CCG--UGUG--AGAGUAGG-UCA--AAUCCAG-GAA----------------------------------------------

>Accession:AE016826::SeqID:45203::TaxID:2
----------------------------------------------------------------------------------------------------------------------------UGGUAA-AA-AU-AGU--G-U-U-AUGG-U-ACCAC-CUG-AAA--C--CAUG-CCGAA-CUCAGA-A----GUGAAA-CAUUUC-AACG-CCG-AUG-GU-AGU-GCAGGG------UAU---CC-CUG--UGUG--AGAGUAGG-ACA--UUACCAG-GUU----------------------------------------------

>Accession:AE014123::SeqID:45207::TaxID:2
----------------------------------------------------------------------------------------------------------------------UG-CC-UGGUAA-AA-AU-AGU--G-U-A-GUGG-U-ACCAC-CUG-AAU--C--CAUU-CCGAA-CUCAGA-A----GUGAAA-CGCUAC-AACG-CCA-AUG-GU-AGU-ACGGGG------UCU---CC-CCG--UGUG--AGAGUAGG-UAU--CAGCCAG-GCAA---------------------------------------------

>Accession:AE013218::SeqID:45208::TaxID:2
----------------------------------------------------------------------------------------------------------------------UG-CC-UGGUAA-AA-AU-AGU--G-U-A-GUGG-U-ACCAC-CUG-AAU--C--CAUU-CCGAA-CUCAGA-A----GUGAAA-CGCUAC-AACG-CCA-AUG-GU-AGU-ACGGGG------UCU---CC-CCG--UGUG--AGAGUAGG-UAU--CAGCCAG-GCAA---------------------------------------------

>Accession:AJ131591::SeqID:46524::TaxID:2
----------------------------------------------------------------------------------------------------------------------UG-CC-UGAUGA-CC-AU-AGC--G-A-G-UCGG-U-SCCAC-CCC-UUC--C--CAUC-CCGAA-CAGGAC-C----GUGAAA-CGACUC-CACG-CCA-AUG-AU-AGU-GCGG-------AUUGC-----CCG--UGUG--AAAGUAGG-UAA--UCGUCAG-GC-----------------------------------------------

>Accession:AJ131592::SeqID:46532::TaxID:2
----------------------------------------------------------------------------------------------------------------------UG-CC-UGAUGA-CC-AU-AGC--G-A-G-UUGG-U-ACCAC-CCC-UUC--C--CAUC-CCGAA-CAGGAC-C----GUGAAA-CGACUC-CACG-CCG-AUG-AU-AGU-GCGG-------AUUGC-----CCG--UGUG--AAAGUAGG-UAA--UCGUCAG-GC-----------------------------------------------

>Accession:AJ131593::SeqID:46539::TaxID:2
----------------------------------------------------------------------------------------------------------------------UG-CC-UGACGA-CC-AU-AGC--G-A-G-UCGG-U-CCCAC-CCC-UUC--C--CAUC-CCGAA-CAGGAC-C----GUGAAA-CGACUC-UACG-CCG-AUG-AU-AGU-GCGG--------AUUC-----CCG--UGUG--AAAGUAGG-UAA--UCGUCAG-GC-----------------------------------------------

>Accession:AJ131593::SeqID:46540::TaxID:2
----------------------------------------------------------------------------------------------------------------------UG-CC-UGAUGA-CC-AU-AGC--G-A-G-UCGG-U-CCCAC-CCC-UUC--C--CAUC-CCGAA-CAGGAC-C----GUGAAA-CGACUC-UACG-CCG-AUG-AU-AGU-GCGG--------AUUC-----CCG--UGUG--AAAGUAGG-UAA--UCGUCAG-GC-----------------------------------------------

>Accession:X02629::SeqID:46541::TaxID:2
----------------------------------------------------------------------------------------------------------------------GG-CC-UGAUGA-CC-AU-AGC--G-A-G-UCGG-U-CCCAC-CCC-UUC--C--CAUC-CCGAA-CAGGAC-C----GUGAAA-CGACUC-UACG-CCG-AUG-AU-AGU-GCGG--------AUUC-----CCG--UGUG--AAAGUAGG-UAA--UCGUCAG-GCU----------------------------------------------

>Accession:CP000010::SeqID:46743::TaxID:2
----------------------------------------------------------------------------------------------------------------------UG-CC-UGAUGA-CC-AU-AGC--G-A-G-UCGG-U-CCCAC-CCC-UUC--C--CAUC-CCGAA-CAGGAC-C----GUGAAA-CGACUC-CACG-CCG-AUG-AU-AGU-GCGG-------AUUGC-----CCG--UGUG--AAAGUAGG-UAA--UCGUCAG-GC-----------------------------------------------

>Accession:CP000011::SeqID:46744::TaxID:2
----------------------------------------------------------------------------------------------------------------------UG-CC-UGAUGA-CC-AU-AGC--G-A-G-UCGG-U-CCCAC-CCC-UUC--C--CAUC-CCGAA-CAGGAC-C----GUGAAA-CGACUC-CACG-CCG-AUG-AU-AGU-GCGG-------AUUGC-----CCG--UGUG--AAAGUAGG-UAA--UCGUCAG-GC-----------------------------------------------

>Accession:CP000011::SeqID:46745::TaxID:2
----------------------------------------------------------------------------------------------------------------------UG-CC-UGAUGA-CC-AU-AGC--G-A-G-UCGG-U-CCCAC-CCC-UUC--C--CAUC-CCGAA-CAGGAC-C----GUGAAA-CGACUC-CACG-CCG-AUG-AU-AGU-GCGG-------AUUGC-----CCG--UGUG--AAAGUAGG-UAA--UCGUCAG-GC-----------------------------------------------

>Accession:CP000124::SeqID:46886::TaxID:2
----------------------------------------------------------------------------------------------------------------------UG-CC-UGAUGA-CC-AU-AGC--G-A-G-UCGG-U-CCCAC-CCC-UUC--C--CAUC-CCGAA-CAGGAC-C----GUGAAA-CGACUC-CACG-CCG-AUG-AU-AGU-GCGG-------AUUGC-----CCG--UGUG--AAAGUAGG-UAA--UCGUCAG-GC-----------------------------------------------

>Accession:CP000124::SeqID:46887::TaxID:2
----------------------------------------------------------------------------------------------------------------------UG-CC-UGAUGA-CC-AU-AGC--G-A-G-UCGG-U-CCCAC-CCC-UUC--C--CAUC-CCGAA-CAGGAC-C----GUGAAA-CGACUC-CACG-CCG-AUG-AU-AGU-GCGG-------AUUGC-----CCG--UGUG--AAAGUAGG-UAA--UCGUCAG-GC-----------------------------------------------

>Accession:CP000124::SeqID:46888::TaxID:2
----------------------------------------------------------------------------------------------------------------------UG-CC-UGAUGA-CC-AU-AGC--G-A-G-UCGG-U-CCCAC-CCC-UUC--C--CAUC-CCGAA-CAGGAC-C----GUGAAA-CGACUC-CACG-CCG-AUG-AU-AGU-GCGG-------AUUGC-----CCG--UGUG--AAAGUAGG-UAA--UCGUCAG-GC-----------------------------------------------

>Accession:CP000125::SeqID:46889::TaxID:2
----------------------------------------------------------------------------------------------------------------------UG-CC-UGAUGA-CC-AU-AGC--G-A-G-UCGG-U-CCCAC-CCC-UUC--C--CAUC-CCGAA-CAGGAC-C----GUGAAA-CGACUC-CACG-CCG-AUG-AU-AGU-GCGG-------AUUGC-----CCG--UGUG--AAAGUAGG-UAA--UCGUCAG-GC-----------------------------------------------

>Accession:BX571965::SeqID:46898::TaxID:2
----------------------------------------------------------------------------------------------------------------------UG-CC-UGAUGA-CC-AU-AGC--G-A-G-UCGG-U-CCCAC-CCC-UUC--C--CAUC-CCGAA-CAGGAC-C----GUGAAA-CGACUC-CACG-CCG-AUG-AU-AGU-GCGG-------AUUGC-----CCG--UGUG--AAAGUAGG-UAA--UCGUCAG-GC-----------------------------------------------

>Accession:BX571965::SeqID:46899::TaxID:2
----------------------------------------------------------------------------------------------------------------------UG-CC-UGAUGA-CC-AU-AGC--G-A-G-UCGG-U-CCCAC-CCC-UUC--C--CAUC-CCGAA-CAGGAC-C----GUGAAA-CGACUC-CACG-CCG-AUG-AU-AGU-GCGG-------AUUGC-----CCG--UGUG--AAAGUAGG-UAA--UCGUCAG-GC-----------------------------------------------

>Accession:BX571965::SeqID:46900::TaxID:2
----------------------------------------------------------------------------------------------------------------------UG-CC-UGAUGA-CC-AU-AGC--G-A-G-UCGG-U-CCCAC-CCC-UUC--C--CAUC-CCGAA-CAGGAC-C----GUGAAA-CGACUC-CACG-CCG-AUG-AU-AGU-GCGG-------AUUGC-----CCG--UGUG--AAAGUAGG-UAA--UCGUCAG-GC-----------------------------------------------

>Accession:BX571966::SeqID:46901::TaxID:2
----------------------------------------------------------------------------------------------------------------------UG-CC-UGAUGA-CC-AU-AGC--G-A-G-UCGG-U-CCCAC-CCC-UUC--C--CAUC-CCGAA-CAGGAC-C----GUGAAA-CGACUC-CACG-CCG-AUG-AU-AGU-GCGG-------AUUGC-----CCG--UGUG--AAAGUAGG-UAA--UCGUCAG-GC-----------------------------------------------

>Accession:CP000150::SeqID:46942::TaxID:2
-------------------------------------------------------------------------------------------------------------------------CC-UGAUGA-CC-AU-AGC--G-A-G-UCGG-U-CCCAC-CCC-UUC--C--CAUC-CCGAA-CAGGAC-C----GUGAAA-CGACUC-UACG-CCG-AUG-AU-AGU-GCGG--------AUUC-----CCG--UGUG--AAAGUAGG-UAA--UCGUCAG-GC-----------------------------------------------

>Accession:CP000151::SeqID:46943::TaxID:2
-------------------------------------------------------------------------------------------------------------------------CC-UGAUGA-CC-AU-AGC--G-A-G-UCGG-U-CCCAC-CCC-UUC--C--CAUC-CCGAA-CAGGAC-C----GUGAAA-CGACUC-UACG-CCG-AUG-AU-AGU-GCGG--------AUUC-----CCG--UGUG--AAAGUAGG-UAA--UCGUCAG-GC-----------------------------------------------

>Accession:CP000151::SeqID:46944::TaxID:2
-------------------------------------------------------------------------------------------------------------------------CC-UGAUGA-CC-AU-AGC--G-A-G-UCGG-U-CCCAC-CCC-UUC--C--CAUC-CCGAA-CAGGAC-C----GUGAAA-CGACUC-UACG-CCG-AUG-AU-AGU-GCGG--------AUUC-----CCG--UGUG--AAAGUAGG-UAA--UCGUCAG-GC-----------------------------------------------

>Accession:CP000151::SeqID:46945::TaxID:2
-------------------------------------------------------------------------------------------------------------------------CC-UGAUGA-CC-AU-AGC--G-A-G-UCGG-U-CCCAC-CCC-UUC--C--CAUC-CCGAA-CAGGAC-C----GUGAAA-CGACUC-UACG-CCG-AUG-AU-AGU-GCGG--------AUUC-----CCG--UGUG--AAAGUAGG-UAA--UCGUCAG-GC-----------------------------------------------

>Accession:CP000151::SeqID:46946::TaxID:2
-------------------------------------------------------------------------------------------------------------------------CC-UGAUGA-CC-AU-AGC--G-A-G-UCGG-U-CCCAC-CCC-UUC--C--CAUC-CCGAA-CAGGAC-C----GUGAAA-CGACUC-UACG-CCG-AUG-AU-AGU-GCGG--------AUUC-----CCG--UGUG--AAAGUAGG-UAA--UCGUCAG-GC-----------------------------------------------

>Accession:CP000152::SeqID:46947::TaxID:2
-------------------------------------------------------------------------------------------------------------------------CC-UGAUGA-CC-AU-AGC--G-A-G-UCGG-U-CCCAC-CCC-UUC--C--CAUC-CCGAA-CAGGAC-C----GUGAAA-CGACUC-UACG-CCG-AUG-AU-AGU-GCGG--------AUUC-----CCG--UGUG--AAAGUAGG-UAA--UCGUCAG-GC-----------------------------------------------

>Accession:CP000085::SeqID:47337::TaxID:2
-----------------------------------------------------------------------------------------------------------------------G-CC-UGAUGA-CC-AU-AGC--G-A-G-UCGG-U-CCCAC-CCC-UUC--C--CAUC-CCGAA-CAGGAC-C----GUGAAA-CGACUC-UACG-CCG-AUG-AU-AGU-GCGG-------AUUGC-----CCG--UGUG--AAAGUAGG-UAA--UCGUCAG-GCU----------------------------------------------

>Accession:CP000086::SeqID:47338::TaxID:2
-----------------------------------------------------------------------------------------------------------------------G-CC-UGAUGA-CC-AU-AGC--G-A-G-UCGG-U-CCCAC-CCC-UUC--C--CAUC-CCGAA-CAGGAC-C----GUGAAA-CGACUC-UACG-CCG-AUG-AU-AGU-GCGG-------AUUGC-----CCG--UGUG--AAAGUAGG-UAA--UCGUCAG-GCU----------------------------------------------

>Accession:CP000086::SeqID:47339::TaxID:2
-----------------------------------------------------------------------------------------------------------------------G-CC-UGAUGA-CC-AU-AGC--G-A-G-UCGG-U-CCCAC-CCC-UUC--C--CAUC-CCGAA-CAGGAC-C----GUGAAA-CGACUC-UACG-CCG-AUG-AU-AGU-GCGG-------AUUGC-----CCG--UGUG--AAAGUAGG-UAA--UCGUCAG-GCU----------------------------------------------

>Accession:CP000086::SeqID:47340::TaxID:2
-----------------------------------------------------------------------------------------------------------------------G-CC-UGAUGA-CC-AU-AGC--G-A-G-UCGG-U-CCCAC-CCC-UUC--C--CAUC-CCGAA-CAGGAC-C----GUGAAA-CGACUC-UACG-CCG-AUG-AU-AGU-GCGG-------AUUGC-----CCG--UGUG--AAAGUAGG-UAA--UCGUCAG-GCU----------------------------------------------

>Accession:AL139076::SeqID:49947::TaxID:2
----------------------------------------------------------------------------------------------------------------------AU-GU-CCGUGA-UU-AU-ACA--G-A-U-GUGG-A-AACGC-CUU-GCU--C--CAUC-CCGAA-CCAAGA-A----GCUAAG-CACAUC-GUGG-GUG-AUG-AU-ACU-ACGCCU------UAC---UG-GCA--GGGGG-AAAGUAGC-UCA--UUGCGGA-C------------------------------------------------

>Accession:AL139074::SeqID:50007::TaxID:2
----------------------------------------------------------------------------------------------------------------------AU-GU-CCGUGA-UU-AU-ACA--G-A-U-GUGG-A-AACGC-CUU-GCU--C--CAUC-CCGAA-CCAAGA-A----GCUAAG-CACAUC-GUGG-GUG-AUG-AU-ACU-ACGCCU------UAC---UG-GCA--GGGGG-AAAGUAGC-UCA--UUGCGGA-CUU----------------------------------------------

>Accession:AL139075::SeqID:50008::TaxID:2
------------------------------------------------------------------------------------------------------------------------------------------------------GG-A-AACGC-CUU-GCU--C--CAUC-CCGAA-CCAAGA-A----GCUAAG-CACAUC-GUGG-GUG-AUG-AU-ACU-ACGCCU------UAC---UG-GCA--GGGGG-AAAGUAGC-UCA--UUGCGGA-CUUguuaaaugucuucauuacuuac------------------------

>Accession:BX248584::SeqID:52209::TaxID:2
---------------------------------------------------------------------------------------------------------------------AAA-CU-UGGUGG-CA-UU-AGC--G-C-G-AUAG-U-ACCAC-CUG-AUGA-C--CAUU-CCGAA-CUCAGA-A----GUGAAA-UGUCGU-GGUA-CCG-AUG-GU-AGU-GUGAGG------AUU---CC-UCA--UGUG--AGAGUAGG-GGG--CUGCCAA-GUUU---------------------------------------------

>Accession:CP000016::SeqID:52220::TaxID:2
-----------------------------------------------------------------------------------------------------------------------A-CU-UGGUGG-CA-UU-AGC--G-C-G-AUAG-U-ACCAC-CUG-AUU--C--CAUU-UCGAA-CUCAGA-A----GUGAAA-UGUCGU-AGUA-CCG-AUG-GU-AGU-GUGGGG------UGU---CC-UCA--UGCG--AGAGUAGG-GGG--CUGCCAA-GU-----------------------------------------------

>Accession:CP000084::SeqID:52521::TaxID:2
----------------------------------------------------------------------------------------------------------------------UC-GC-CGGUGA-UU-AU-UGC--G-A-A-GGGG-U-UAUAC-CCG-AUC--C--CAUU-CCGAA-CUCGGA-A----GUCAAG-CCCUUC-AGCG-CCA-AUG-GU-ACU-UUGUC-------UUAA---G-ACA--CGGA--AGAGUAGG-ACA--UUGCCGG-CUAU---------------------------------------------

>Accession:AY268081::SeqID:52621::TaxID:2
----------------------------------------------------------------------------------------------------------------------AG-CU-UGACGA-AU-AU-AGU--U-U-G-UGGG-A-CCAAC-CUG-AAA--C--CAUU-CCGAA-CUCAGA-A----GUUAAA-UCACCU-AACG-CCU-AUG-GU-AGU-AUGAGG------UUCU--CC-UCA--UGUG--AGAGUAGG-UUA--UCGUCAG-GCUA---------------------------------------------

>Accession:AF481102::SeqID:52770::TaxID:2
----------------------------------------------------------------------------------------------------------------------AG-UC-CUGACU-CG-CA-AUG--A-U-G-CUGG-A-CCCAC-AGC-UGC--C--CAUU-CCGAA-CAGUUA-U----GUGACA-CAGCAU-GCGG-CUG-AUG-AU-AGU-GCCGG------caugc---C-CGG--UGCG--AAAGCAGG-UU---UCGUCAG-GA-----------------------------------------------

>Accession:AF481103::SeqID:52771::TaxID:2
----------------------------------------------------------------------------------------------------------------------AG-UC-CUGACU-CG-CA-AUG--A-U-G-CUGG-A-CCCAC-AGC-UGC--C--CAUU-CCGAA-CAGUUA-U----GUGACA-CAGCAU-GCGG-CUG-AUG-AU-AGU-GCCGG------caugc---C-CGG--UGCG--AAAGCAGG-UU---UCGUCAG-GA-----------------------------------------------

>Accession:CP000141::SeqID:53926::TaxID:2
-------------------------------------------------------------------------------------------------------------------------UC-CGGUGG-CC-AU-AGC--G-G-A-GGGG-A-AACAC-CCG-UUC--C--CAUU-CCGAA-CACGGC-A----GUUAAG-CCCUCC-AGCG-CCA-AUG-GU-ACU-GGGAC------GAUAG---G-UCC--CGGG--AGAGUAGG-UCG--CUGCCGG--------------------------------------------------

>Accession:CP000141::SeqID:53927::TaxID:2
-------------------------------------------------------------------------------------------------------------------------UC-CGGUGG-CC-AU-AGC--G-G-A-GGGG-A-AACAC-CCG-UUC--C--CAUU-CCGAA-CACGGC-A----GUUAAG-CCCUCC-AGCG-CCA-AUG-GU-ACU-GGGAC------GAUAG---G-UCC--UGGG--AGAGUAGG-UCG--CUGCCGG--------------------------------------------------

>Accession:CP000141::SeqID:53928::TaxID:2
-------------------------------------------------------------------------------------------------------------------------UC-CGGUGG-CC-AU-AGC--G-G-A-GGGG-A-AACAC-CCG-UUC--C--CAUU-CCGAA-CACGGC-A----GUUAAG-CCCUCC-AGCG-CCA-AUG-GU-ACU-GGGAC------GAUAG---G-UCC--UGGG--AGAGUAGG-UCG--CUGCCGG--------------------------------------------------

>Accession:CP000141::SeqID:53929::TaxID:2
-------------------------------------------------------------------------------------------------------------------------UC-CGGUGG-CC-AU-AGC--G-G-A-GGGG-A-AACAC-CCG-UUC--C--CAUU-CCGAA-CACGGC-A----GUUAAG-CCCUCC-AGCG-CCA-AUG-GU-ACU-GGGAC------GAUAG---G-UCC--UGGG--AGAGUAGG-UCG--CUGCCGG--------------------------------------------------

>Accession:AE006010::SeqID:55272::TaxID:2
----------------------------------------------------------------------------------------------------------------------GA-CC-UGGUGG-CU-AU-GCC--G-G-G-GGUU-C-CCCAC-CCG-AUC--C--CAUU-CCGAA-CUCGGU-C----GUUAAG-UCCCCC-UGGG-CCA-AUG-GU-ACU-UCGUC-------UCAA---G-GCG--CGGG--AGAGUAGG-UCG--CCGCCAG-G------------------------------------------------

>Accession:X06576::SeqID:55329::TaxID:2
---------------------------------------------------------------------------------------------------------------------CGA-CC-UGGUGG-CU-AU-GCC--G-G-G-GGUU-A-CCCAC-CCG-AUC--C--CAUU-CCGAA-CUCGGU-C----GUUAAG-UCCCCC-UGGG-CCA-AUG-GU-ACU-UCGUC-------UCAA---G-GCG--CGGG--AGAGUAGG-UCG--CCGCCAG-G------------------------------------------------

>Accession:M16172::SeqID:55625::TaxID:2
-----------------------------------------------------------------------------------------------------------------------G-UUACGGCGG-UC-AU-AGC--G-A-A-GGGG-A-AACGC-CCG-GUC--C--CAUU-CCGAA-CCCGGA-A----GCUAAG-CCCUUC-AGCG-CCG-AUG-GU-ACU-GCACUC------GCCA--GG-GUG--UGGG--AGAGUAGG-ACG--CCGCCGG-ACA----------------------------------------------

>Accession:X55262::SeqID:55703::TaxID:2
----------------------------------------------------------------------------------------------------------------------GU-UA-CGGCGG-UC-AC-AGC--G-A-A-GGGG-A-AACGC-CCG-GUC--C--CAUA-CCGAA-CCCGGA-A----GCUAAG-CCCUUC-AGCG-CCG-AUG-GU-ACU-GCCCUG------GAGA--CG-GGG--UGGG--AGAGUAGG-UCG--CCGCCGG-ACA----------------------------------------------

>Accession:AE002279::SeqID:59760::TaxID:2
-----------------------------------------------------------------------------------------------------------------------G-CU-UGGUGA-UA-AU-AGA--G-A-G-AGGG-A-AACAC-CUG-AUA--C--CAUU-CCGAA-CUCAGA-A----GUUAAG-CCUCUG-AUCG-CUG-AUG-GU-ACU-AUACAC------AAGA--GU-AU---GGGA--GA-GUAGG-UCG--UUGCCAA-GC-----------------------------------------------

>Accession:AE002280::SeqID:59761::TaxID:2
-------------------------------------------------------------------------------------------------------------------AUUAG-CU-UGGUGA-UA-AU-AGA--G-A-G-AGGG-A-AACAC-CUG-AUA--C--CAUU-CCGAA-CUCAGA-A----GUUAAG-CCUCUG-AUCG-CUG-AUG-GU-ACU-AUACAC------AAGA--GU-AU---GGGA--GA-GUAGG-UCG--UUGCCAA-GCAUUUUAUUACAGAAUAUCUUAGUCA-CA-GACU--------------

>Accession:AE002160::SeqID:59766::TaxID:2
-----------------------------------------------------------------------------------------------------------------------G-CU-UGGUGA-UA-AU-AGA--G-A-G-AGGG-A-AACAC-CUG-AUA--C--CAUU-CCGAA-CUCAGA-A----GUUAAG-CCUCUG-AUCG-CUG-AUG-GU-ACU-AUACAC------AAGA--GU-AU---GGGA--GA-GUAGG-UCG--UUGCCAA-GC-----------------------------------------------

>Accession:AE002160::SeqID:59767::TaxID:2
-------------------------------------------------------------------------------------------------------------------AUUAG-CU-UGGUGA-UA-AU-AGA--G-A-G-AGGG-A-AACAC-CUG-AUA--C--CAUU-CCGAA-CUCAGA-A----GUUAAG-CCUCUG-AUCG-CUG-AUG-GU-ACU-AUACAC------AAGA--GU-AU---GGGA--GA-GUAGG-UCG--UUGCCAA-GCAUUUUAUUACAGAAUAUCUUAGUCA-CA-GACU--------------

>Accession:AE001273::SeqID:59796::TaxID:2
-------------------------------------------------------------------------------------------------------------------------CU-UGGUGA-UA-AU-AGA--G-A-G-AGGG-A-AACAC-CUG-ACA--C--CAUU-CCGAA-CUCAGA-A----GUUAAG-CCUCUG-AUCG-CUG-AUG-GU-ACU-AUACAC------AAGA--GU-AU---GGGA--GA-GUAGG-UCG--UCGCCAA-G------------------------------------------------

>Accession:AE001345::SeqID:59832::TaxID:2
-------------------------------------------------------------------------------------------------------------------------CU-UGGUGA-UA-AU-AGA--G-A-G-AGGG-A-AACAC-CUG-ACA--C--CAUU-CCGAA-CUCAGA-A----GUUAAG-CCUCUG-AUCG-CUG-AUG-GU-ACU-AUACAC------AAGA--GU-AU---GGGA--GA-GUAGG-UCG--UCGCCAA-GCAU---------------------------------------------

>Accession:AE001347::SeqID:59833::TaxID:2
-------------------------------------------------------------------------------------------------------------------------CU-UGGUGA-UA-AU-AGA--G-A-G-AGGG-A-AACAC-CUG-ACA--C--CAUU-CCGAA-CUCAGA-A----GUUAAG-CCUCUG-AUCG-CUG-AUG-GU-ACU-AUACAC------AAGA--GU-AU---GGGA--GA-GUAGG-UCG--UCGCCAA-GCAU---------------------------------------------

>Accession:CR848038::SeqID:60129::TaxID:2
-----------------------------------------------------------------------------------------------------------------------G-CU-UGGUGA-UA-AU-GGA--A-A-A-AGGG-A-UACAC-CUG-AUA--C--CAUU-CCGAA-CUCAGA-A----GUUAAG-CCUUUU-AUCG-CCG-AUG-GU-ACU-AUACAC------AAGA--GU-AU---GGGA--GA-GUAGG-UCG--UCGCCAA-GCU----------------------------------------------

>Accession:AE016997::SeqID:60135::TaxID:2
-----------------------------------------------------------------------------------------------------------------------G-CU-UGGUGA-UA-AU-GGA--A-A-A-AGGG-A-CACAC-CUG-ACC--C--CAUU-CCGAA-CUCAGA-A----GUUAAG-CCUUUU-AUCG-CCG-AUG-GU-ACU-AUACAC------AAGA--GU-AU---GGGA--GA-GUAGG-UCG--UUGCCAA-GCU----------------------------------------------

>Accession:AE015925::SeqID:60136::TaxID:2
-----------------------------------------------------------------------------------------------------------------------G-CU-UGGUGA-UA-AU-GGA--A-A-A-AGGG-A-CACAC-CUG-ACC--C--CAUU-CCGAA-CUCAGA-A----GUUAAG-CCUUUU-AUCG-CCG-AUG-GU-ACU-AUACAC------AAGA--GU-AU---GGGA--GA-GUAGG-UCG--UUGCCAA-GCU----------------------------------------------

>Accession:AE002161::SeqID:60172::TaxID:2
-----------------------------------------------------------------------------------------------------------------------G-CU-UGGCGA-UA-CU-GGA--G-A-A-AGGG-A-UACAC-CUG-AUA--C--CAUU-CCGAA-CUCAGA-A----GUUAAG-CCUUUU-AUCG-CUG-AUG-GU-ACU-AUACAC------AAGA--GU-AU---GGGA--GA-GUAAG-UCG--UUGCCAA-GCUUUCUAUUAUAUGUUU-------------------------------

>Accession:AE001363::SeqID:60175::TaxID:2
-------------------------------------------------------------------------------------------------------------------------CU-UGGCGA-UA-CU-GGA--G-A-A-AGGG-A-UACAC-CUG-AUA--C--CAUU-CCGAA-CUCAGA-A----GUUAAG-CCUUUU-AUCG-CUG-AUG-GU-ACU-AUACAC------AAGA--GU-AU---GGGA--GA-GUAAG-UCG--UUGCCAA-GCUU---------------------------------------------

>Accession:AE017160::SeqID:60181::TaxID:2
--------------------------------------------------------------------------------------------------------------------------U-UGGCGA-UA-CU-GGA--G-A-A-AGGG-A-UACAC-CUG-AUA--C--CAUU-CCGAA-CUCAGA-A----GUUAAG-CCUUUU-AUCG-CUG-AUG-GU-ACU-AUACAC------AAGA--GU-AU---GGGA--GA-GUAAG-UCG--UUGCCAA-GCUUU--------------------------------------------

>Accession:M33893::SeqID:60599::TaxID:2
-----------------------------------------------------------------------------------------------------------------------C-CA-CGGCGA-CU-AU-AUC--C-C-U-GG-U-G-UUCAC-CUC-UUC--C--CAUU-CCGAA-CAGAGU-C----GUUAAG-CCCAGG-AGAG-CCG-AUG-GU-ACU-GCU---------UUAU------UG--CGGG--AGAGUAGG-UCG--UCGCCGA-GU-----------------------------------------------

>Accession:M33892::SeqID:60612::TaxID:2
-----------------------------------------------------------------------------------------------------------------------C-UA-CGGCGA-CU-UU-UUC--C-C-A-GG-U-G-AUCAC-CUC-UUC--C--CAUU-CCGAA-CAGAGU-C----GUUAAG-cCCUGG-aGAG-CCG-AUG-GU-ACU-GCU---------UCAC------UG--CGGG--AGAGUAGG-UCG--UCGCCGA-U------------------------------------------------

>Accession:AE012794::SeqID:60627::TaxID:2
--------------------------------------------------------------------------------------------------------------------------A-CGGCGA-CU-AU--AU--C-C-C-UGGU-G-UUCAC-CUC-UUC--C--CAUU-CCGAA-CAGAGU-C----GUUAAG-CCCAGG-AGAG-CCG-AUG-GU-ACU-GCU---------UUAU------UG--CGGG--AGAGUAGG-UCG--UCGCCGA-GU-----------------------------------------------

>Accession:AE012963::SeqID:60628::TaxID:2
--------------------------------------------------------------------------------------------------------------------------A-CGGCGA-CU-AU-AUC--C-C-U--GGU-G-UUCAC-CUC-UUC--C--CAUU-CCGAA-CAGAGU-C----GUUAAG-CCCAGG-AGAG-CCG-AUG-GU-ACU-GC------U--UUAUU-------G--CGGG--AGAGUAGG-UCG--UCGCCGA-GU-----------------------------------------------

>Accession:AE016911::SeqID:61339::TaxID:2
----------------------------------------------------------------------------------------------------------------------UG-UC-UGGUGG-CC-AU-AGC--G-A-G-GUGG-U-CCCAC-GCC-UUC--C--CAUC-CCGAA-CAGGAC-C----GUGAAA-CGCCUU-AGCG-CCG-AUG-AU-AGU-GUGGC-------AUUC---G-CCA--UGUG--AAAGUAGG-ACA--CCGCCA---------------------------------------------------

>Accession:AE016913::SeqID:61340::TaxID:2
----------------------------------------------------------------------------------------------------------------------UG-UC-UGGUGG-CC-AU-AGC--G-A-G-GUGG-U-CCCAC-GCC-UUC--C--CAUC-CCGAA-CAGGAC-C----GUGAAA-CGCCUU-AGCG-CCG-AUG-AU-AGU-GUGGC-------AUUC---G-CCA--UGUG--AAAGUAGG-ACA--CCGCCA---------------------------------------------------

>Accession:AE016915::SeqID:61341::TaxID:2
----------------------------------------------------------------------------------------------------------------------UG-UC-UGGUGG-CC-AU-AGC--G-A-G-GUGG-U-CCCAC-GCC-UUC--C--CAUC-CCGAA-CAGGAC-C----GUGAAA-CGCCUU-AGCG-CCG-AUG-AU-AGU-GUGGC-------AUUC---G-CCA--UGUG--AAAGUAGG-ACA--CCGCCA---------------------------------------------------

>Accession:AE016921::SeqID:61342::TaxID:2
----------------------------------------------------------------------------------------------------------------------UG-UC-UGGUGG-CC-AU-AGC--G-A-G-GUGG-U-CCCAC-GCC-UUC--C--CAUC-CCGAA-CAGGAC-C----GUGAAA-CGCCUU-AGCG-CCG-AUG-AU-AGU-GUGGC-------AUUC---G-CCA--UGUG--AAAGUAGG-ACA--CCGCCA---------------------------------------------------

>Accession:AE016922::SeqID:61343::TaxID:2
----------------------------------------------------------------------------------------------------------------------UG-UC-UGGUGG-CC-AU-AGC--G-A-G-GUGG-U-CCCAC-GCC-UUC--C--CAUC-CCGAA-CAGGAC-C----GUGAAA-CGCCUU-AGCG-CCG-AUG-AU-AGU-GUGGC-------AUUC---G-CCA--UGUG--AAAGUAGG-ACA--CCGCCA---------------------------------------------------

>Accession:AE016924::SeqID:61344::TaxID:2
----------------------------------------------------------------------------------------------------------------------UG-UC-UGGUGG-CC-AU-AGC--G-A-G-GUGG-U-CCCAC-GCC-UUC--C--CAUC-CCGAA-CAGGAC-C----GUGAAA-CGCCUU-AGCG-CCG-AUG-AU-AGU-GUGGC-------AUUC---G-CCA--UGUG--AAAGUAGG-ACA--CCGCCA---------------------------------------------------

>Accession:AE016924::SeqID:61345::TaxID:2
----------------------------------------------------------------------------------------------------------------------UG-UC-UGGUGG-CC-AU-AGC--G-A-G-GUGG-U-CCCAC-GCC-UUC--C--CAUC-CCGAA-CAGGAC-C----GUGAAA-CGCCUU-AGCG-CCG-AUG-AU-AGU-GUGGC-------AUUC---G-CCA--UGUG--AAAGUAGG-ACA--CCGCCA---------------------------------------------------

>Accession:AE016911::SeqID:61346::TaxID:2
----------------------------------------------------------------------------------------------------------------------UG-UC-UGGUGG-CC-AU-AGC--G-A-G-GUGG-U-CCCAC-GCC-UUC--C--CAUC-CCGAA-CAGGAC-C----GUGAAA-CGCCUU-AGCG-CCG-AUG-AU-AGU-GUGGC-------AUUC---G-CCA--UGUG--AAAGUAGG-ACA--CCGCCA---------------------------------------------------

>Accession:AE016825::SeqID:61369::TaxID:2
----------------------------------------------------------------------------------------------------------------------UG-UC-UGGUGG-CC-AU-AGC--G-A-G-GUGG-U-CCCAC-GCC-UUC--C--CAUC-CCGAA-CAGGAC-C----GUGAAA-CGCCUU-AGCG-CCG-AUG-AU-AGU-GUGGC-------AUUC---G-CCA--UGUG--AAAGUAGG-ACA--CCGCCA---------------------------------------------------

>Accession:AE016825::SeqID:61370::TaxID:2
----------------------------------------------------------------------------------------------------------------------UG-UC-UGGUGG-CC-AU-AGC--G-A-G-GUGG-U-CCCAC-GCC-UUC--C--CAUC-CCGAA-CAGGAC-C----GUGAAA-CGCCUU-AGCG-CCG-AUG-AU-AGU-GUGGC-------AUUC---G-CCA--UGUG--AAAGUAGG-ACA--CCGCCA---------------------------------------------------

>Accession:AE016825::SeqID:61371::TaxID:2
----------------------------------------------------------------------------------------------------------------------UG-UC-UGGUGG-CC-AU-AGC--G-A-G-GUGG-U-CCCAC-GCC-UUC--C--CAUC-CCGAA-CAGGAC-C----GUGAAA-CGCCUU-AGCG-CCG-AUG-AU-AGU-GUGGC-------AUUC---G-CCA--UGUG--AAAGUAGG-ACA--CCGCCA---------------------------------------------------

>Accession:AE016825::SeqID:61372::TaxID:2
----------------------------------------------------------------------------------------------------------------------UG-UC-UGGUGG-CC-AU-AGC--G-A-G-GUGG-U-CCCAC-GCC-UUC--C--CAUC-CCGAA-CAGGAC-C----GUGAAA-CGCCUU-AGCG-CCG-AUG-AU-AGU-GUGGC-------AUUC---G-CCA--UGUG--AAAGUAGG-ACA--CCGCCA---------------------------------------------------

>Accession:AE016825::SeqID:61373::TaxID:2
----------------------------------------------------------------------------------------------------------------------UG-UC-UGGUGG-CC-AU-AGC--G-A-G-GUGG-U-CCCAC-GCC-UUC--C--CAUC-CCGAA-CAGGAC-C----GUGAAA-CGCCUU-AGCG-CCG-AUG-AU-AGU-GUGGC-------AUUC---G-CCA--UGUG--AAAGUAGG-ACA--CCGCCA---------------------------------------------------

>Accession:AE016825::SeqID:61374::TaxID:2
----------------------------------------------------------------------------------------------------------------------UG-UC-UGGUGG-CC-AU-AGC--G-A-G-GUGG-U-CCCAC-GCC-UUC--C--CAUC-CCGAA-CAGGAC-C----GUGAAA-CGCCUU-AGCG-CCG-AUG-AU-AGU-GUGGC-------AUUC---G-CCA--UGUG--AAAGUAGG-ACA--CCGCCA---------------------------------------------------

>Accession:AE016825::SeqID:61375::TaxID:2
----------------------------------------------------------------------------------------------------------------------UG-UC-UGGUGG-CC-AU-AGC--G-A-G-GUGG-U-CCCAC-GCC-UUC--C--CAUC-CCGAA-CAGGAC-C----GUGAAA-CGCCUU-AGCG-CCG-AUG-AU-AGU-GUGGC-------AUUC---G-CCA--UGUG--AAAGUAGG-ACA--CCGCCA---------------------------------------------------

>Accession:AE016825::SeqID:61376::TaxID:2
----------------------------------------------------------------------------------------------------------------------UG-UC-UGGUGG-CC-AU-AGC--G-A-G-GUGG-U-CCCAC-GCC-UUC--C--CAUC-CCGAA-CAGGAC-C----GUGAAA-CGCCUU-AGCG-CCG-AUG-AU-AGU-GUGGC-------AUUC---G-CCA--UGUG--AAAGUAGG-ACA--CCGCCA---------------------------------------------------

>Accession:S73542::SeqID:64791::TaxID:2
-----------------------------------------------------------------------------------------------------------------------G-UUUCGGCGG-CC-AU-AGC--G-A-G-AGGG-A-AACGC-CCG-GUC--A--CAUU-CCGAA-CCCGGA-A----GCUAAG-ACUCUC-AGCG-CCG-AUG-GU-ACU-GCAGGG------GGGA--CC-CUG--UGGG--AGAGUAGG-ACA--CCGCCGG-AC-----------------------------------------------

>Accession:AE007514::SeqID:66002::TaxID:2
-------------------------------------------------------------------------------------------------------------------------UC-CGGUGA-CC-AU-AGC--U-U-G-GUUG-U-AACAC-CCG-UUC--C--CAUA-CCGAA-CACGAA-G----GUUAAG-AACCAA-AGCG-CCG-AUG-GU-ACU-GCAGGG------GCAG--CC-CUG--UGGG--AGAGUAGG-UCA--UUGCCGG-GU-----------------------------------------------

>Accession:AE007527::SeqID:66003::TaxID:2
-------------------------------------------------------------------------------------------------------------------------UC-CGGUGA-CU-AU-AGC--U-U-G-GUUG-U-AACAC-CCG-UUC--C--CAUA-CCGAA-CACGAA-G----GUUAAG-AACCAA-AGCG-CCG-AUG-GU-ACU-GCAGGG------GCAG--CC-CUG--UGGG--AGAGUAGG-UCA--UUGCCGG-GU-----------------------------------------------

>Accession:AE007528::SeqID:66004::TaxID:2
-------------------------------------------------------------------------------------------------------------------------UC-CGGUGA-UC-AU-AGC--U-U-G-GUUG-U-AACAC-CAG-UUC--C--CAUA-CCGAA-CACGAA-G----GUUAAG-AACCAA-AGCG-CCG-AUGCGU-ACU-GCAGGG------GCAA--CC-GUG--UGUC--AAAUGAGG-UCA--UUGCCGG-GU-----------------------------------------------

>Accession:AE007528::SeqID:66005::TaxID:2
-------------------------------------------------------------------------------------------------------------------------UC-CGGUGA-CU-AU-AGC--U-U-G-GUUG-U-AACAC-CCG-UUC--C--CAUA-CCGAA-CACGAA-G----GUUAAG-AACCAA-AGCG-CCG-AUG-GU-ACU-GCAGGG------GCAG--CC-CUG--UGGG--AGAGUAGG-UCA--UUGCCGG-GU-----------------------------------------------

>Accession:AE007541::SeqID:66006::TaxID:2
-------------------------------------------------------------------------------------------------------------------------UC-CGGUGA-CC-AU-AGC--U-U-G-GUUG-U-AACAC-CCG-UUC--C--CAUA-CCGAA-CACGAA-G----GUUAAG-AACCAA-AGCG-CCG-AUG-GU-ACU-GCAGGG------GCAG--CC-CUG--UGGG--AGAGUAGG-UCA--UUGCCGG-GU-----------------------------------------------

>Accession:AE007543::SeqID:66007::TaxID:2
-------------------------------------------------------------------------------------------------------------------------UC-CGGUGA-CU-AU-AGC--U-U-G-GUUG-U-AACAC-CCG-UUC--C--CAUA-CCGAA-CACGAA-G----GUUAAG-AACCAA-AGCG-CCG-AUG-GU-ACU-GCAGGG------GCAG--CC-CUG--UGGG--ACAGUAGG-UCA--UUGCCGG-GU-----------------------------------------------

>Accession:AE007543::SeqID:66008::TaxID:2
-------------------------------------------------------------------------------------------------------------------------UC-CGGUGA-UC-AU-AGC--U-U-G-GUUG-U-AACAC-CAG-UUC--C--CAUA-CCGAA-CACGAA-G----GUUAAG-AACCAA-AGCG-CCG-AUGCGU-ACU-GCAGGG------GCAA--CC-GUG--UGUC--AAAUGAGG-UCA--UUGCCGG-GU-----------------------------------------------

>Accession:AE007544::SeqID:66009::TaxID:2
-------------------------------------------------------------------------------------------------------------------------UC-CGGUGA-CC-AU-AGC--U-U-G-GUUG-U-AACAC-CCG-UUC--C--CAUA-CCGAA-CACGAA-G----GUUAAG-AACCAA-AGCG-CCG-AUG-GU-ACU-GCAGGG------GCAG--CC-CUG--UGGG--ACAGUAGG-UCA--UUGCCGG-GU-----------------------------------------------

>Accession:AE007612::SeqID:66010::TaxID:2
-------------------------------------------------------------------------------------------------------------------------UC-CGGUGA-CC-AU-AGC--U-U-G-GUUG-U-AACAC-CCG-UUC--C--CAUA-CCGAA-CACGAA-G----GUUAAG-AACCAA-AGCG-CCG-AUG-GU-ACU-GCAGGG------GCAG--CC-CUG--UGGG--AGAGUAGG-UCA--UUGCCGG-GU-----------------------------------------------

>Accession:AE007814::SeqID:66011::TaxID:2
-------------------------------------------------------------------------------------------------------------------------UC-CGGUGA-CC-AU-AGC--U-U-G-GUUG-U-AACAC-CCG-UUC--C--CAUA-CCGAA-CACGAA-G----GUUAAG-AACCAA-AGCG-CCG-AUG-GU-ACU-GCAGGG------GCAG--CC-CUG--UGGG--AGAGUAGG-UCA--UUGCCGG-GU-----------------------------------------------

>Accession:AE007536::SeqID:66030::TaxID:2
-------------------------------------------------------------------------------------------------------------------------UC-CGGUGA-CC-AU-AGC--U-U-G-GUUG-U-AACAC-CCG-UUC--C--CAUA-CCGAA-CACGAA-G----GUUAAG-AACCAA-AGCG-CCG-AUG-GU-ACU-GCAGGG------GCAG--CC-CUG--UGGG--AGAGUAGG-UCA--UUGCCGG-GU-----------------------------------------------

>Accession:M36152::SeqID:66066::TaxID:2
-------------------------------------------------------------------------------------------------------------------------DG-UGGUUA-UU-AC-AGC--A-A-A-GAGG-A-UACAC-CUG-UUC--C--CAUU-CCGAA-CACAGA-A----GUUAAG-CUCUUU-AGCG-CCG-AUG-GU-ACU-UGGUGG------GAAG--CU-GCC--UGGG--AGAGUAGG-ACG--UAGCCGC-GU-----------------------------------------------

>Accession:S51077::SeqID:66075::TaxID:2
-------------------------------------------------------------------------------------------------------------------------UC-UGGUGA-UU-AU-GGC--U-U-G-AAGG-U-AACAC-CCG-------------------------------------------------------------------------------------------------------------------------------------------------------------------------

>Accession:M36154::SeqID:66106::TaxID:2
-------------------------------------------------------------------------------------------------------------------------UC-UGGUGA-UG-AU-GGC--A-U-A-GAGG-U-AACAC-UCC-UUC--C--CAUU-CCGAA-CAGGAC-A----GUUAAG-GUCUAU-AGCG-CCG-AUG-GU-ACU-GCAUGG------GAGA--CU-GUG--UGGA--AGAGUAGG-ACG--UCGCCAG-GU-----------------------------------------------

>Accession:X13663::SeqID:66121::TaxID:2
-------------------------------------------------------------------------------------------------------------------------CC-UAGUGA-UG-AU-GGC--G-U-A-GAGG-A-AACAC-UCC-UUU--C--CAUU-CCGAA-CAGGAC-A----GUUAAG-CUCUAC-AGCG-UCG-AUG-GU-ACU-GCACGG------GUGA--CU-GUG--UGGG--AGAGUAGA-ACG--UUGCUAG-GU-----------------------------------------------

>Accession:X01942::SeqID:66227::TaxID:2
-------------------------------------------------------------------------------------------------------------------------UC-CAGUGU-CU-AU-GAC--U-U-A-GAGG-U-AACAC-UCC-UUC--C--CAUU-CCGAA-CAGGCA-G----GUUAAG-CUCUAA-UGUG-CUG-AUG-GU-ACU-GCAGGG------GAAG--CC-CUG--UGGA--GAAGUAGG-UCG--ACGCUGG-GU-----------------------------------------------

>Accession:M36153::SeqID:66228::TaxID:2
-------------------------------------------------------------------------------------------------------------------------DC-CAGUGU-CU-AU-GAC--U-U-A-GAGG-U-AACAC-UCC-UUC--C--CAUU-CCGAA-CAGGCA-G----GUUAAG-CUCUAA-UGUG-CUG-AUG-GU-ACU-GCAGGG------GAAG--CC-CUG--UGGA--AGAGUAGG-UCG--ACGCUGG-GU-----------------------------------------------

>Accession:AB045282::SeqID:66250::TaxID:2
---------------------------------------------------------------------------------------------------------------------UCA-UC-UGGUGA-UG-AU-GCUC-U-U-U-AGGG-U-AACAC-CCG-UUUU-C--CAUU-CCGAA-CACGAA-G----GUUAAG-CCUAUU-GAGG-CCG-AUG-GU-ACU-GCAC---------------------------------------------------------------------------------------------------

>Accession:AB045283::SeqID:66251::TaxID:2
---------------------------------------------------------------------------------------------------------------------UCA-UC-UGGUGA-UG-AU-GCUC-U-U-U-AGGG-U-AACAC-CCG-UUUU-C--CAUU-CCGAA-CACGAA-G----GUUAAG-CCUAUU-GAGG-CCG-AUG-GU-ACU-GCAC---------------------------------------------------------------------------------------------------

>Accession:AB045284::SeqID:66252::TaxID:2
---------------------------------------------------------------------------------------------------------------------ACA-UC-UGGUGA-UG-AU-GUUC-U-U-U-AGGG-U-AACAC-CCG-UUC--C--CAUU-CCGAA-CACGAC-G----GUUAAG-CCUUUA-GAAG-CCG-AUG-GU-ACU-GCAC---------------------------------------------------------------------------------------------------

>Accession:AB045285::SeqID:66253::TaxID:2
---------------------------------------------------------------------------------------------------------------------ACA-UC-UGGUGA-UG-AU-GUUC-U-U-U-AGGG-U-AACAC-CCG-UUC--C--CAUU-CCGAA-CACGAC-G----GUUAAG-CCUUUA-GAAG-CCG-AUG-GU-ACU-GCAC---------------------------------------------------------------------------------------------------

>Accession:AB045286::SeqID:66254::TaxID:2
---------------------------------------------------------------------------------------------------------------------ACA-UC-UGGUGA-UG-AU-GUUC-U-U-U-AGGG-U-AACAC-CCG-UUC--C--CAUU-CCGAA-CACGAC-G----GUUAAG-CCUUUA-GAAG-CCG-AUG-GU-ACU-GCACG--------------------------------------------------------------------------------------------------

>Accession:AB045287::SeqID:66255::TaxID:2
---------------------------------------------------------------------------------------------------------------------ACA-UC-UGGUGA-UG-AU-GUUC-U-U-U-AGGG-U-AACAC-CCG-UUC--C--CAUU-CCGAA-CACGAC-G----GUUAAG-CCUUUA-GAAG-CCG-AUG-GU-ACU-GCACG--------------------------------------------------------------------------------------------------

>Accession:AB045288::SeqID:66256::TaxID:2
---------------------------------------------------------------------------------------------------------------------ACA-UC-UGGUGA-UG-AU-GUUC-U-U-U-AGGG-U-AACAC-CCG-UUC--C--CAUU-CCGAA-CACGAC-G----GUUAAG-CCUUUA-GAAG-CCG-AUG-GU-ACU-GCAC---------------------------------------------------------------------------------------------------

>Accession:AB045289::SeqID:66257::TaxID:2
---------------------------------------------------------------------------------------------------------------------ACA-UC-UGGUGA-UG-AU-GUUC-U-U-U-AGGG-U-AACAC-CCG-UUC--C--CAUU-CCGAA-CACGAC-G----GUUAAG-CCUUUA-GAAG-CCG-AUG-GU-ACU-GCAC---------------------------------------------------------------------------------------------------

>Accession:AB045290::SeqID:66258::TaxID:2
---------------------------------------------------------------------------------------------------------------------UAA-UC-UGGUGA-UG-AU-GUUC-U-U-U-AGGG-U-AACAC-CCG-UUC--C--CAUU-CCGAA-CACGAC-G----GUUAAG-CCUUUA-GAAG-CCG-AUG-GU-ACU-GCAC---------------------------------------------------------------------------------------------------

>Accession:AP003185::SeqID:66294::TaxID:2
-------------------------------------------------------------------------------------------------------------------------UC-UGGUGA-UG-AU-GCUC-U-U-U-AGGG-U-AACAC-CCG-UUUU-C--CAUU-CCGAA-CACGAA-G----GUUAAG-CCUAUU-GAGG-CCG-AUG-GU-ACU-GCACGG------GAGA--CU-GUG--UGGG--AGAGUAGG-UGG--UUGCC----------------------------------------------------

>Accession:AP003185::SeqID:66295::TaxID:2
-------------------------------------------------------------------------------------------------------------------------UC-UGGUGA-UG-AU-GCUC-U-U-U-AGGG-U-AACAC-CCG-UUUU-C--CAUU-CCGAA-CACGAA-G----GUUAAG-CCUAUU-GAGG-CCG-AUG-GU-ACU-GCACGG------GAGA--CU-GUG--UGGG--AGAGUAGG-UGG--UUGCC----------------------------------------------------

>Accession:AP003185::SeqID:66296::TaxID:2
-------------------------------------------------------------------------------------------------------------------------UC-UGGUGA-UG-AU-GUUC-U-U-U-AGGG-U-AACAC-CCG-UUC--C--CAUU-CCGAA-CACGAC-G----GUUAAG-CCUUUA-GAAG-CCG-AUG-GU-ACU-GCACGG------GAGA--CU-GUG--UGGG--AGAGUAGG-UGG--UCGCC----------------------------------------------------

>Accession:AP003185::SeqID:66297::TaxID:2
-------------------------------------------------------------------------------------------------------------------------UC-UGGUGA-UG-AU-GUUC-U-U-U-AGGG-U-AACAC-CCG-UUC--C--CAUU-CCGAA-CACGAC-G----GUUAAG-CCUUUA-GAAG-CCG-AUG-GU-ACU-GCACGG------GAGA--CU-GUG--UGGG--AGAGUAGG-UGG--UCGCC----------------------------------------------------

>Accession:AP003185::SeqID:66298::TaxID:2
-------------------------------------------------------------------------------------------------------------------------UC-UGGUGA-UG-AU-GUUC-U-U-U-AGGG-U-AACAC-CCG-UUC--C--CAUU-CCGAA-CACGAC-G----GUUAAG-CCUUUA-GAAG-CCG-AUG-GU-ACU-GCACGG------GAGA--CU-GUG--UGGG--AGAGUAGG-UGG--UCGCC----------------------------------------------------

>Accession:AP003186::SeqID:66299::TaxID:2
-------------------------------------------------------------------------------------------------------------------------UC-UGGUGA-UG-AU-GUUC-U-U-U-AGGG-U-AACAC-CCG-UUC--C--CAUU-CCGAA-CACGAC-G----GUUAAG-CCUUUA-GAAG-CCG-AUG-GU-ACU-GCACGG------GAGA--CU-GUG--UGGG--AGAGUAGG-UGG--UCGCC----------------------------------------------------

>Accession:AP003187::SeqID:66300::TaxID:2
-------------------------------------------------------------------------------------------------------------------------UC-UGGUGA-UG-AU-GUUC-U-U-U-AGGG-U-AACAC-CCG-UUC--C--CAUU-CCGAA-CACGAC-G----GUUAAG-CCUUUA-GAAG-CCG-AUG-GU-ACU-GCACGG------GAGA--CU-GUG--UGGG--AGAGUAGG-UGG--UCGCC----------------------------------------------------

>Accession:AP003193::SeqID:66301::TaxID:2
-------------------------------------------------------------------------------------------------------------------------UC-UGGUGA-UG-AU-GUUC-U-U-U-AGGG-U-AACAC-CCG-UUC--C--CAUU-CCGAA-CACGAC-G----GUUAAG-CCUUUA-GAAG-CCG-AUG-GU-ACU-GCACGG------GAGA--CU-GUG--UGGG--AGAGUAGG-UGG--UCGCC----------------------------------------------------

>Accession:AP003194::SeqID:66302::TaxID:2
-------------------------------------------------------------------------------------------------------------------------UC-UGGUGA-UG-AU-GUUC-U-U-U-AGGG-U-AACAC-CCG-UUC--C--CAUU-CCGAA-CACGAC-G----GUUAAG-CCUUUA-GAAG-CCG-AUG-GU-ACU-GCACGG------GAGA--CU-GUG--UGGG--AGAGUAGG-UGG--UCGCC----------------------------------------------------

>Accession:BA000016::SeqID:66303::TaxID:2
-------------------------------------------------------------------------------------------------------------------------UC-UGGUGA-UG-AU-GUUC-U-U-U-AGGG-U-AACAC-CCG-UUC--C--CAUU-CCGAA-CACGAC-G----GUUAAG-CCUUUA-GAAG-CCG-AUG-GU-ACU-GCACGG------GAGA--CU-GUG--UGGG--AGAGUAGG-UGG--UCGCC----------------------------------------------------

>Accession:BA000016::SeqID:66304::TaxID:2
-------------------------------------------------------------------------------------------------------------------------UC-UGGUGA-UG-AU-GUUC-U-U-U-AGGG-U-AACAC-CCG-UUC--C--CAUU-CCGAA-CACGAC-G----GUUAAG-CCUUUA-GAAG-CCG-AUG-GU-ACU-GCACGG------GAGA--CU-GUG--UGGG--AGAGUAGG-UGG--UCGCC----------------------------------------------------

>Accession:BA000016::SeqID:66305::TaxID:2
-------------------------------------------------------------------------------------------------------------------------UC-UGGUGA-UG-AU-GUUC-U-U-U-AGGG-U-AACAC-CCG-UUC--C--CAUU-CCGAA-CACGAC-G----GUUAAG-CCUUUA-GAAG-CCG-AUG-GU-ACU-GCACGG------GAGA--CU-GUG--UGGG--AGAGUAGG-UGG--UCGCC----------------------------------------------------

>Accession:BA000016::SeqID:66306::TaxID:2
-------------------------------------------------------------------------------------------------------------------------UC-UGGUGA-UG-AU-GUUC-U-U-U-AGGG-U-AACAC-CCG-UUC--C--CAUU-CCGAA-CACGAC-G----GUUAAG-CCUUUA-GAAG-CCG-AUG-GU-ACU-GCACGG------GAGA--CU-GUG--UGGG--AGAGUAGG-UGG--UCGCC----------------------------------------------------

>Accession:BA000016::SeqID:66307::TaxID:2
-------------------------------------------------------------------------------------------------------------------------UC-UGGUGA-UG-AU-GUUC-U-U-U-AGGG-U-AACAC-CCG-UUC--C--CAUU-CCGAA-CACGAC-G----GUUAAG-CCUUUA-GAAG-CCG-AUG-GU-ACU-GCACGG------GAGA--CU-GUG--UGGG--AGAGUAGG-UGG--UCGCC----------------------------------------------------

>Accession:BA000016::SeqID:66308::TaxID:2
-------------------------------------------------------------------------------------------------------------------------UC-UGGUGA-UG-AU-GUUC-U-U-U-AGGG-U-AACAC-CCG-UUC--C--CAUU-CCGAA-CACGAC-G----GUUAAG-CCUUUA-GAAG-CCG-AUG-GU-ACU-GCACGG------GAGA--CU-GUG--UGGG--AGAGUAGG-UGG--UCGCC----------------------------------------------------

>Accession:BA000016::SeqID:66309::TaxID:2
-------------------------------------------------------------------------------------------------------------------------UC-UGGUGA-UG-AU-GUUC-U-U-U-AGGG-U-AACAC-CCG-UUC--C--CAUU-CCGAA-CACGAC-G----GUUAAG-CCUUUA-GAAG-CCG-AUG-GU-ACU-GCACGG------GAGA--CU-GUG--UGGG--AGAGUAGG-UGG--UCGCC----------------------------------------------------

>Accession:BA000016::SeqID:66310::TaxID:2
-------------------------------------------------------------------------------------------------------------------------UC-UGGUGA-UG-AU-GCUC-U-U-U-AGGG-U-AACAC-CCG-UUUU-C--CAUU-CCGAA-CACGAA-G----GUUAAG-CCUAUU-GAGG-CCG-AUG-GU-ACU-GCACGG------GAGA--CU-GUG--UGGG--AGAGUAGG-UGG--UUGCC----------------------------------------------------

>Accession:AE015936::SeqID:66599::TaxID:2
------------------------------------------------------------------------------------------------------------------------------------------------------GG-U-AACAC-CCG-UUC--C--CAUG-CCGAA-CACGAU-G----GUUAAG-CUUCUA-AGCG-CCG-AUG-GU-ACU-GCAAGG------GUGA--CC-UUG--UGGG--AGAGUAGG-ACG-----------------------------------------------------------

>Accession:AE015936::SeqID:66600::TaxID:2
------------------------------------------------------------------------------------------------------------------------------------------------------GG-U-AACAC-CCG-UUC--C--CAUG-CCGAA-CACGAU-G----GUUAAG-CUUCUA-AGCG-CCG-AUG-GU-ACU-GCAAGG------GUGA--CC-UUG--UGGG--AGAGUAGG-ACG-----------------------------------------------------------

>Accession:AE015936::SeqID:66601::TaxID:2
------------------------------------------------------------------------------------------------------------------------------------------------------GG-U-AACAC-CCG-UUC--C--CAUG-CCGAA-CACGAU-G----GUUAAG-CUUCUA-AGCG-CCG-AUG-GU-ACU-GCAAGG------GCGA--CC-UUG--UGGG--AGAGUAGG-ACG-----------------------------------------------------------

>Accession:AE015937::SeqID:66602::TaxID:2
------------------------------------------------------------------------------------------------------------------------------------------------------GG-U-AACAC-CCG-UUC--C--CAUG-CCGAA-CACGAU-G----GUUAAG-CUUCUA-AGCG-CCG-AUG-GU-ACU-GCAAGG------GUGA--CC-UUG--UGGG--AGAGUAAG-A-------------------------------------------------------------

>Accession:AE015945::SeqID:66603::TaxID:2
------------------------------------------------------------------------------------------------------------------------------------------------------GG-U-AACAC-CCG-UUC--C--CAUG-CCGAA-CACGAU-G----GUUAAG-CUUCUA-AGCG-CCG-AUG-GU-ACU-GCAAGG------GCAA--CC-UUG--UGGG--AGAGUAGG-ACG-----------------------------------------------------------

>Accession:AE015945::SeqID:66604::TaxID:2
------------------------------------------------------------------------------------------------------------------------------------------------------GG-U-AACAC-CCG-UUC--C--CAUG-CCGAA-CACGAU-G----GUUAAG-CUUCUA-AGCG-CCG-AUG-GU-ACU-GCAAGG------GCAA--CC-UUG--UGGG--AGAGUAGG-ACG-----------------------------------------------------------

>Accession:AE015927::SeqID:66605::TaxID:2
------------------------------------------------------------------------------------------------------------------------------------------------------GG-U-AACAC-CCG-UUC--C--CAUG-CCGAA-CACGAU-G----GUUAAG-CUUCUA-AGCG-CCG-AUG-GU-ACU-GCAAGG------GUGA--CC-UUG--UGGG--AGAGUAAG-A-------------------------------------------------------------

>Accession:AE015927::SeqID:66606::TaxID:2
------------------------------------------------------------------------------------------------------------------------------------------------------GG-U-AACAC-CCG-UUC--C--CAUG-CCGAA-CACGAU-G----GUUAAG-CUUCUA-AGCG-CCG-AUG-GU-ACU-GCAAGG------GUGA--CC-UUG--UGGG--AGAGUAGG-ACG-----------------------------------------------------------

>Accession:AE015927::SeqID:66607::TaxID:2
------------------------------------------------------------------------------------------------------------------------------------------------------GG-U-AACAC-CCG-UUC--C--CAUG-CCGAA-CACGAU-G----GUUAAG-CUUCUA-AGCG-CCG-AUG-GU-ACU-GCAAGG------GUGA--CC-UUG--UGGG--AGAGUAGG-ACG-----------------------------------------------------------

>Accession:AE015927::SeqID:66608::TaxID:2
------------------------------------------------------------------------------------------------------------------------------------------------------GG-U-AACAC-CCG-UUC--C--CAUG-CCGAA-CACGAU-G----GUUAAG-CUUCUA-AGCG-CCG-AUG-GU-ACU-GCAAGG------GCGA--CC-UUG--UGGG--AGAGUAGG-ACG-----------------------------------------------------------

>Accession:AE015927::SeqID:66609::TaxID:2
------------------------------------------------------------------------------------------------------------------------------------------------------GG-U-AACAC-CCG-UUC--C--CAUG-CCGAA-CACGAU-G----GUUAAG-CUUCUA-AGCG-CCG-AUG-GU-ACU-GCAAGG------GCAA--CC-UUG--UGGG--AGAGUAGG-ACG-----------------------------------------------------------

>Accession:AE015927::SeqID:66610::TaxID:2
------------------------------------------------------------------------------------------------------------------------------------------------------GG-U-AACAC-CCG-UUC--C--CAUG-CCGAA-CACGAU-G----GUUAAG-CUUCUA-AGCG-CCG-AUG-GU-ACU-GCAAGG------GCAA--CC-UUG--UGGG--AGAGUAGG-ACG-----------------------------------------------------------

>Accession:M36156::SeqID:66635::TaxID:2
-------------------------------------------------------------------------------------------------------------------------DC-AGGUGG-CG-AU-GGC--G-G-A-AAGG-U-CACAC-CCG-UUC--C--CAUC-CCGAA-CACGGA-A----GUUAAG-CUUUCC-AGCG-CCG-AUG-GU-AGU-UGGGGG------UCU---CC-CCC--UGCG--AGAGUAGG-ACG--UUGCCGG-GC-----------------------------------------------

>Accession:M36157::SeqID:66636::TaxID:2
-------------------------------------------------------------------------------------------------------------------------DC-AGGUGG-CG-AU-GGC--G-G-A-AAGG-U-CACAC-CCG-UUC--C--CAUC-CCGAA-CACGGA-A----GUUAAG-CUUUCC-AGCG-CCG-AUG-GU-AGU-UGGGGG------UCU---CC-CCC--UGCG--AGAGUAGG-ACG--CUGCCGG-GC-----------------------------------------------

>Accession:M58416::SeqID:66637::TaxID:2
-------------------------------------------------------------------------------------------------------------------------UC-AGGUGG-CG-AU-GGC--G-G-A-AAGG-U-CACAC-CCG-AAC--A--CAUC-CCGAA-CUCGGA-A----GUUAAG-CUUUCC-AGCG-CCG-AUG-GU-AGU-UGGGGG------UUU---CC-CCC--UGCG--AGAGUAGG-ACG--CUGCCGG-GC-----------------------------------------------

>Accession:M36159::SeqID:66638::TaxID:2
-------------------------------------------------------------------------------------------------------------------------DC-AGGUGG-UG-AU-GGC--G-G-A-AAGG-U-CACAC-CCG-AAC--A--CAUC-CCGAA-CUCGGA-A----GUUAAG-CUUUCC-AGCG-CCG-AUG-GU-AGU-UGGGGG------UUU---CC-CCC--UGCG--AGAGUAGG-ACG--UUGCCGG-GC-----------------------------------------------

>Accession:AY593480::SeqID:68261::TaxID:2
----------------------------------------------------------------------------------------------------------------------UG-CC-UGAUGA-CC-AU-AGC--G-A-G-UUGG-U-ACCAC-CCC-UUC--C--CAUC-CCGAA-CAGGAC-C----GUGAAA-CGACUU-UGCG-CCG-AUG-AU-AGU-GCUG--------CAAC-----CAG--UGUG--AAAGUAGG-UCA--UCGUCAG-GC-----------------------------------------------

>Accession:X02260::SeqID:68618::TaxID:2
----------------------------------------------------------------------------------------------------------------------UG-CU-UAGCGA-CA-AU-AGU--G-C-U-GUAG-A-CCCAC-CUG-AUC--C--CAUU-CCGAA-CUCAGU-A----GUGAAA-CGCAGU-AGCG-CCG-AUG-GU-AGU-GUGGG-------AGUU---C-CCA--UGUG--AGAGUAGG-ACA--UUGCUAA-GCAU---------------------------------------------

>Accession:CP000083::SeqID:68620::TaxID:2
----------------------------------------------------------------------------------------------------------------------UG-UC-UAGCGA-CA-AU-AGC--G-C-U-GUGG-U-CCCAC-CUG-AUC--C--CUUU-CCGAA-CUCAGA-A----GUGAAA-CGCAGU-UGCG-CCG-AUG-GU-AGU-GUGGG-------AGUU---C-CCA--UGUG--AGAGUAGG-ACA--UUGCUAG-AC-----------------------------------------------

>Accession:CP000083::SeqID:68621::TaxID:2
----------------------------------------------------------------------------------------------------------------------UG-UU-UAGCGA-CA-AU-AGC--G-C-U-GUGG-U-CCCAC-CUG-AUC--C--CUUU-CCGAA-CUCAGA-A----GUGAAA-CGCAGU-UGCG-CCG-AUG-GU-AGU-GUGGG-------AGUU---C-CCA--UGUG--AGAGUAGG-ACA--UUGCUAA-ACUU---------------------------------------------

>Accession:CP000083::SeqID:68622::TaxID:2
----------------------------------------------------------------------------------------------------------------------UG-UU-UAGCGA-CA-AU-AGC--G-C-U-GUGG-U-CCCAC-CUG-AUC--C--CUUU-CCGAA-CUCAGA-A----GUGAAA-CGCAGU-UGCG-CCG-AUG-GU-AGU-GUGGG-------AGUU---C-CCA--UGUG--AGAGUAGG-ACA--UUGCUAA-ACUU---------------------------------------------

>Accession:CP000083::SeqID:68623::TaxID:2
----------------------------------------------------------------------------------------------------------------------UG-UU-UAGCGA-CA-AU-AGC--G-C-U-GUGG-U-CCCAC-CUG-AUC--C--CUUU-CCGAA-CUCAGA-A----GUGAAA-CGCAGU-UGCG-CCG-AUG-GU-AGU-GUGGG-------AGUU---C-CCA--UGUG--AGAGUAGG-ACA--UUGCUAA-ACUU---------------------------------------------

>Accession:CP000083::SeqID:68624::TaxID:2
----------------------------------------------------------------------------------------------------------------------UG-UU-UAGCGA-CA-AU-AGC--G-C-U-GUGG-U-CCCAC-CUG-AUC--C--CUUU-CCGAA-CUCAGA-A----GUGAAA-CGCAGU-UGCG-CCG-AUG-GU-AGU-GUGGG-------AGUU---C-CCA--UGUG--AGAGUAGG-ACA--UUGCUAA-ACUU---------------------------------------------

>Accession:CP000083::SeqID:68625::TaxID:2
----------------------------------------------------------------------------------------------------------------------UG-UU-UAGCGA-CA-AU-AGC--G-C-U-GUGG-U-CCCAC-CUG-AUC--C--CUUU-CCGAA-CUCAGA-A----GUGAAA-CGCAGU-UGCG-CCG-AUG-GU-AGU-GUGGG-------AGUU---C-CCA--UGUG--AGAGUAGG-ACA--UUGCUAA-ACUU---------------------------------------------

>Accession:CP000083::SeqID:68626::TaxID:2
----------------------------------------------------------------------------------------------------------------------UG-UU-UAGCGA-CA-AU-AGC--G-C-U-GUGG-U-CCCAC-CUG-AUC--C--CUUU-CCGAA-CUCAGA-A----GUGAAA-CGCAGU-UGCG-CCG-AUG-GU-AGU-GUGGG-------AGUU---C-CCA--UGUG--AGAGUAGG-ACA--UUGCUAA-ACUU---------------------------------------------

>Accession:CP000083::SeqID:68627::TaxID:2
----------------------------------------------------------------------------------------------------------------------UG-UU-UAGCGA-CA-AU-AGC--G-C-U-GUGG-U-CCCAC-CUG-AUC--C--CUUU-CCGAA-CUCAGA-A----GUGAAA-CGCAGU-UGCG-CCG-AUG-GU-AGU-GUGGG-------AGUU---C-CCA--UGUG--AGAGUAGG-ACA--UUGCUAA-ACUU---------------------------------------------

>Accession:CP000083::SeqID:68628::TaxID:2
----------------------------------------------------------------------------------------------------------------------UG-UU-UAGCGA-CA-AU-AGC--G-C-U-GUGG-U-CCCAC-CUG-AUC--C--CUUU-CCGAA-CUCAGA-A----GUGAAA-CGCAGU-UGCG-CCG-AUG-GU-AGU-GUGGG-------AGUU---C-CCA--UGUG--AGAGUAGG-ACA--UUGCUAA-ACUU---------------------------------------------

>Accession:CP000083::SeqID:68629::TaxID:2
----------------------------------------------------------------------------------------------------------------------UG-UU-UAGCGA-CA-AU-AGC--G-C-U-GUGG-U-CCCAC-CUG-AUC--C--CUUU-CCGAA-CUCAGA-A----GUGAAA-CGCAGU-UGCG-CCG-AUG-GU-AGU-GUGGG-------AGUU---C-CCA--UGUG--AGAGUAGG-ACA--UUGCUAA-ACUU---------------------------------------------

>Accession:AJ131595::SeqID:68814::TaxID:2
----------------------------------------------------------------------------------------------------------------------UG-CC-UGAUGA-CC-AU-AGC--G-A-U-UUGG-U-ACCAC-UCC-UUC--C--CAUC-CCGAA-CAGGAC-A----GUGAAA-CGAAUU-UGCG-CCG-AUG-AU-AGU-GCGG--------GUUC-----CCG--UGUG--AAAGUAGG-UCA--UCGUCAG-GC-----------------------------------------------

>Accession:X16194::SeqID:68815::TaxID:2
-----------------------------------------------------------------------------------------------------------------------G-CC-UGAUGA-CC-AU-AGC--G-A-U-UUGG-U-ACCAC-UCC-UUC--C--CAUC-CCGAA-CAGGAC-A----GUGAAA-CGAAUU-UGCG-CCG-AUG-AU-AGU-GCGG--------GUUC-----CCG--UGUG--AAAGUAGG-UCA--UCGUCAG-GCU----------------------------------------------

>Accession:AJ131596::SeqID:68823::TaxID:2
----------------------------------------------------------------------------------------------------------------------UG-CC-UGAUGA-CC-AU-AGC--A-A-G-UUGG-U-ACCAC-UCC-UUC--C--CAUC-CCGAA-CAGGAC-A----GUGAAA-CGACUU-UGCG-CCG-AUG-AU-AGU-GCGG--------GUUC-----CCG--UGUG--AAAGUAGG-UCA--UCGUCAG-GC-----------------------------------------------

>Accession:BX248356::SeqID:72627::TaxID:2
----------------------------------------------------------------------------------------------------------------------UGUGU-UGGUGG-UU-AU-UGU--G-U-C-GGGG-G-UACGC-CCG-GUC--C--CUUU-CCGAA-CCCGGA-A----GCUAAG-CCCGAU-UGCG-CUG-AUG-GU-ACU-GCACCU------GGGA--GG-GUG--UGGG--AGAGUAGG-UCG--CCGCCAA-CCU----------------------------------------------

>Accession:BX248357::SeqID:72628::TaxID:2
----------------------------------------------------------------------------------------------------------------------UGUGU-UGGUGG-UU-AU-UGU--G-U-C-GGGG-G-UACGC-CCG-GUC--C--CUUU-CCGAA-CCCGGA-A----GCUAAG-CCCGAU-UGCG-CUG-AUG-GU-ACU-GCACCU------GGGA--GG-GUG--UGGG--AGAGUAGG-UCG--CCGCCAA-CCU----------------------------------------------

>Accession:BX248359::SeqID:72629::TaxID:2
----------------------------------------------------------------------------------------------------------------------UGUGU-UGGUGG-UU-AU-UGU--G-U-C-GGGG-G-UACGC-CCG-GUC--C--CUUU-CCGAA-CCCGGA-A----GCUAAG-CCCGAU-UGCG-CUG-AUG-GU-ACU-GCACCU------GGGA--GG-GUG--UGGG--AGAGUAGG-UCG--CCGCCAA-CCU----------------------------------------------

>Accession:BX248360::SeqID:72630::TaxID:2
----------------------------------------------------------------------------------------------------------------------UGUGU-UGGUGG-UU-AU-UGU--G-U-C-GGGG-G-UACGC-CCG-GUC--C--CUUU-CCGAA-CCCGGA-A----GCUAAG-CCCGAU-UGCG-CUG-AUG-GU-ACU-GCACCU------GGGA--GG-GUG--UGGG--AGAGUAGG-UCG--CCGCCAA-CCU----------------------------------------------

>Accession:BX248360::SeqID:72631::TaxID:2
----------------------------------------------------------------------------------------------------------------------UGUGU-UGGUGG-UU-AU-UGU--G-U-C-GGGG-G-UACGC-CCG-GUC--C--CUUU-CCGAA-CCCGGA-A----GCUAAG-CCCGAU-UGCG-CUG-AUG-GU-ACU-GCACCU------GGGA--GG-GUG--UGGG--AGAGUAGG-UCG--CCGCCAA-CCU----------------------------------------------

>Accession:X55255::SeqID:72632::TaxID:2
----------------------------------------------------------------------------------------------------------------------UGUGU-UGGUGG-UU-AU-UGU--G-U-C-GGGG-G-UACGC-CCG-GUC--C--CUUU-CCGAA-CCCGGA-A----GCUAAG-CCCGAU-UGCG-CUG-AUG-GU-ACU-GCACCU------GGGA--GG-GUG--UGGG--AGAGUAGG-UCG--CUGCCAA-CCU----------------------------------------------

>Accession:AP005217::SeqID:72659::TaxID:2
----------------------------------------------------------------------------------------------------------------------UGUGU-CGGUGG-UG-AU-AGU--A-G-C-AGGG-A-AACGC-CCG-GUC--C--CAUU-CCGAA-CCCGGA-A----GCUAAG-CCUGGU-UACG-CUG-AUG-GU-ACU-GCACUC------GGGA--GG-GUG--UGGG--AGAGUAGG-UGA--CCGCCGA-CC-----------------------------------------------

>Accession:AP005219::SeqID:72660::TaxID:2
----------------------------------------------------------------------------------------------------------------------UGUGU-CGGUGG-UG-AU-AGU--A-G-C-AGGG-A-AACGC-CCG-GUC--C--CAUU-CCGAA-CCCGGA-A----GCUAAG-CCUGGU-UACG-CUG-AUG-GU-ACU-GCACUC------GGGA--GG-GUG--UGGG--AGAGUAGG-UGA--CCGCCGA-CC-----------------------------------------------

>Accession:AP005222::SeqID:72661::TaxID:2
----------------------------------------------------------------------------------------------------------------------UGUGU-CGGUGG-UG-AU-AGU--A-G-C-AGGG-A-AACGC-CCG-GUC--C--CAUU-CCGAA-CCCGGA-A----GCUAAG-CCUGGU-UACG-CUG-AUG-GU-ACU-GCACUC------GGGA--GG-GUG--UGGG--AGAGUAGG-UGA--CCGCCGA-CC-----------------------------------------------

>Accession:AP005223::SeqID:72662::TaxID:2
----------------------------------------------------------------------------------------------------------------------UGUGU-CGGUGG-UG-AU-AGU--A-G-C-AGGG-A-AACGC-CCG-GUC--C--CAUU-CCGAA-CCCGGA-A----GCUAAG-CCUGGU-UACG-CUG-AUG-GU-ACU-GCACUC------GGGA--GG-GUG--UGGG--AGAGUAGG-UGA--CCGCCGA-CC-----------------------------------------------

>Accession:AP005223::SeqID:72663::TaxID:2
----------------------------------------------------------------------------------------------------------------------UGUGU-CGGUGG-UG-AU-AGU--A-G-C-AGGG-A-AACGC-CCG-GUC--C--CAUU-CCGAA-CCCGGA-A----GCUAAG-CCUGGU-UACG-CUG-AUG-GU-ACU-GCACUC------GGGA--GG-GUG--UGGG--AGAGUAGG-UGA--CCGCCGA-CC-----------------------------------------------

>Accession:BA000035::SeqID:72664::TaxID:2
----------------------------------------------------------------------------------------------------------------------UGUGU-CGGUGG-UG-AU-AGU--A-G-C-AGGG-A-AACGC-CCG-GUC--C--CAUU-CCGAA-CCCGGA-A----GCUAAG-CCUGGU-UACG-CUG-AUG-GU-ACU-GCACUC------GGGA--GG-GUG--UGGG--AGAGUAGG-UGA--CCGCCGA-CC-----------------------------------------------

>Accession:BA000035::SeqID:72665::TaxID:2
----------------------------------------------------------------------------------------------------------------------UGUGU-CGGUGG-UG-AU-AGU--A-G-C-AGGG-A-AACGC-CCG-GUC--C--CAUU-CCGAA-CCCGGA-A----GCUAAG-CCUGGU-UACG-CUG-AUG-GU-ACU-GCACUC------GGGA--GG-GUG--UGGG--AGAGUAGG-UGA--CCGCCGA-CC-----------------------------------------------

>Accession:BA000035::SeqID:72666::TaxID:2
----------------------------------------------------------------------------------------------------------------------UGUGU-CGGUGG-UG-AU-AGU--A-G-C-AGGG-A-AACGC-CCG-GUC--C--CAUU-CCGAA-CCCGGA-A----GCUAAG-CCUGGU-UACG-CUG-AUG-GU-ACU-GCACUC------GGGA--GG-GUG--UGGG--AGAGUAGG-UGA--CCGCCGA-CC-----------------------------------------------

>Accession:BA000035::SeqID:72667::TaxID:2
----------------------------------------------------------------------------------------------------------------------UGUGU-CGGUGG-UG-AU-AGU--A-G-C-AGGG-A-AACGC-CCG-GUC--C--CAUU-CCGAA-CCCGGA-A----GCUAAG-CCUGGU-UACG-CUG-AUG-GU-ACU-GCACUC------GGGA--GG-GUG--UGGG--AGAGUAGG-UGA--CCGCCGA-CC-----------------------------------------------

>Accession:BA000035::SeqID:72668::TaxID:2
----------------------------------------------------------------------------------------------------------------------UGUGU-CGGUGG-UG-AU-AGU--A-G-C-AGGG-A-AACGC-CCG-GUC--C--CAUU-CCGAA-CCCGGA-A----GCUAAG-CCUGGU-UACG-CUG-AUG-GU-ACU-GCACUC------GGGA--GG-GUG--UGGG--AGAGUAGG-UGA--CCGCCGA-CC-----------------------------------------------

>Accession:AF314192::SeqID:72700::TaxID:2
----------------------------------------------------------------------------------------------------------------------UGUGU-CGGUGG-UG-AU-AGU--A-G-C-AGGG-A-AACGC-CCG-GUC--C--CUUU-CCGAA-CCCGGA-A----GCUAAG-CCUGGU-UACG-CUG-AUG-GU-ACU-GCACUC------GGGA--GG-GUG--UGGG--AGAGUAGG-UUA--CCGCCGA-CC-----------------------------------------------

>Accession:M16175::SeqID:72701::TaxID:2
----------------------------------------------------------------------------------------------------------------------UGUGU-CGGUGG-UG-AU-AGU--A-G-C-AGGG-A-AACGC-CCG-GUC--C--CUUU-CCGAA-CCCGGA-A----GCUAAG-CCUGGU-UACG-CUG-AUG-GU-ACU-GCACUC------GGGA--GG-GUG--UGGG--AGAGUAGG-UUA--CCGCCGA-CCA----------------------------------------------

>Accession:AP005274::SeqID:72739::TaxID:2
----------------------------------------------------------------------------------------------------------------------UGUGU-CGGUGG-UG-AU-AGU--A-G-C-AGGG-A-AACGC-CCG-GUC--C--CUUU-CCGAA-CCCGGA-A----GCUAAG-CCUGGU-UACG-CUG-AUG-GU-ACU-GCACUC------GGGA--GG-GUG--UGGG--AGAGUAGG-UUA--CCGCCGA-CC-----------------------------------------------

>Accession:AP005276::SeqID:72740::TaxID:2
----------------------------------------------------------------------------------------------------------------------UGUGU-CGGUGG-UG-AU-AGU--A-G-C-AGGG-A-AACGC-CCG-GUC--C--CUUU-CCGAA-CCCGGA-A----GCUAAG-CCUGGU-UACG-CUG-AUG-GU-ACU-GCACUC------GGGA--GG-GUG--UGGG--AGAGUAGG-UUA--CCGCCGA-CC-----------------------------------------------

>Accession:AP005278::SeqID:72741::TaxID:2
----------------------------------------------------------------------------------------------------------------------UGUGU-CGGUGG-UG-AU-AGU--A-G-C-AGGG-A-AACGC-CCG-GUC--C--CUUU-CCGAA-CCCGGA-A----GCUAAG-CCUGGU-UACG-CUG-AUG-GU-ACU-GCACUC------GGGA--GG-GUG--UGGG--AGAGUAGG-UUA--CCGCCGA-CC-----------------------------------------------

>Accession:AP005282::SeqID:72742::TaxID:2
----------------------------------------------------------------------------------------------------------------------UGUGU-CGGUGG-UG-AU-AGU--A-G-C-AGGG-A-AACGC-CCG-GUC--C--CUUU-CCGAA-CCCGGA-A----GCUAAG-CCUGGU-UACG-CUG-AUG-GU-ACU-GCACUC------GGGA--GG-GUG--UGGG--AGAGUAGG-UUA--CCGCCGA-CC-----------------------------------------------

>Accession:AP005282::SeqID:72743::TaxID:2
----------------------------------------------------------------------------------------------------------------------UGUGU-CGGUGG-UG-AU-AGU--A-G-C-AGGG-A-AACGC-CCG-GUC--C--CUUU-CCGAA-CCCGGA-A----GCUAAG-CCUGGU-UACG-CUG-AUG-GU-ACU-GCACUC------GGGA--GG-GUG--UGGG--AGAGUAGG-UUA--CCGCCGA-CC-----------------------------------------------

>Accession:AP005283::SeqID:72744::TaxID:2
----------------------------------------------------------------------------------------------------------------------UGUGU-CGGUGG-UG-AU-AGU--A-G-C-AGGG-A-AACGC-CCG-GUC--C--CUUU-CCGAA-CCCGGA-A----GCUAAG-CCUGGU-UACG-CUG-AUG-GU-ACU-GCACUC------GGGA--GG-GUG--UGGG--AGAGUAGG-UUA--CCGCCGA-CC-----------------------------------------------

>Accession:BA000036::SeqID:72745::TaxID:2
----------------------------------------------------------------------------------------------------------------------UGUGU-CGGUGG-UG-AU-AGU--A-G-C-AGGG-A-AACGC-CCG-GUC--C--CUUU-CCGAA-CCCGGA-A----GCUAAG-CCUGGU-UACG-CUG-AUG-GU-ACU-GCACUC------GGGA--GG-GUG--UGGG--AGAGUAGG-UUA--CCGCCGA-CC-----------------------------------------------

>Accession:BA000036::SeqID:72746::TaxID:2
----------------------------------------------------------------------------------------------------------------------UGUGU-CGGUGG-UG-AU-AGU--A-G-C-AGGG-A-AACGC-CCG-GUC--C--CUUU-CCGAA-CCCGGA-A----GCUAAG-CCUGGU-UACG-CUG-AUG-GU-ACU-GCACUC------GGGA--GG-GUG--UGGG--AGAGUAGG-UUA--CCGCCGA-CC-----------------------------------------------

>Accession:BA000036::SeqID:72747::TaxID:2
----------------------------------------------------------------------------------------------------------------------UGUGU-CGGUGG-UG-AU-AGU--A-G-C-AGGG-A-AACGC-CCG-GUC--C--CUUU-CCGAA-CCCGGA-A----GCUAAG-CCUGGU-UACG-CUG-AUG-GU-ACU-GCACUC------GGGA--GG-GUG--UGGG--AGAGUAGG-UUA--CCGCCGA-CC-----------------------------------------------

>Accession:BA000036::SeqID:72748::TaxID:2
----------------------------------------------------------------------------------------------------------------------UGUGU-CGGUGG-UG-AU-AGU--A-G-C-AGGG-A-AACGC-CCG-GUC--C--CUUU-CCGAA-CCCGGA-A----GCUAAG-CCUGGU-UACG-CUG-AUG-GU-ACU-GCACUC------GGGA--GG-GUG--UGGG--AGAGUAGG-UUA--CCGCCGA-CC-----------------------------------------------

>Accession:BA000036::SeqID:72749::TaxID:2
----------------------------------------------------------------------------------------------------------------------UGUGU-CGGUGG-UG-AU-AGU--A-G-C-AGGG-A-AACGC-CCG-GUC--C--CUUU-CCGAA-CCCGGA-A----GCUAAG-CCUGGU-UACG-CUG-AUG-GU-ACU-GCACUC------GGGA--GG-GUG--UGGG--AGAGUAGG-UUA--CCGCCGA-CC-----------------------------------------------

>Accession:BA000036::SeqID:72750::TaxID:2
----------------------------------------------------------------------------------------------------------------------UGUGU-CGGUGG-UG-AU-AGU--A-G-C-AGGG-A-AACGC-CCG-GUC--C--CUUU-CCGAA-CCCGGA-A----GCUAAG-CCUGGU-UACG-CUG-AUG-GU-ACU-GCACUC------GGGA--GG-GUG--UGGG--AGAGUAGG-UUA--CCGCCGA-CC-----------------------------------------------

>Accession:BX927148::SeqID:72751::TaxID:2
----------------------------------------------------------------------------------------------------------------------UGUGU-CGGUGG-UG-AU-AGU--A-G-C-AGGG-A-AACGC-CCG-GUC--C--CUUU-CCGAA-CCCGGA-A----GCUAAG-CCUGGU-UACG-CUG-AUG-GU-ACU-GCACUC------GGGA--GG-GUG--UGGG--AGAGUAGG-UUA--CCGCCGA-CC-----------------------------------------------

>Accession:BX927150::SeqID:72752::TaxID:2
----------------------------------------------------------------------------------------------------------------------UGUGU-CGGUGG-UG-AU-AGU--A-G-C-AGGG-A-AACGC-CCG-GUC--C--CUUU-CCGAA-CCCGGA-A----GCUAAG-CCUGGU-UACG-CUG-AUG-GU-ACU-GCACUC------GGGA--GG-GUG--UGGG--AGAGUAGG-UUA--CCGCCGA-CC-----------------------------------------------

>Accession:BX927152::SeqID:72753::TaxID:2
----------------------------------------------------------------------------------------------------------------------UGUGU-CGGUGG-UG-AU-AGU--A-G-C-AGGG-A-AACGC-CCG-GUC--C--CUUU-CCGAA-CCCGGA-A----GCUAAG-CCUGGU-UACG-CUG-AUG-GU-ACU-GCACUC------GGGA--GG-GUG--UGGG--AGAGUAGG-UUA--CCGCCGA-CC-----------------------------------------------

>Accession:BX927155::SeqID:72754::TaxID:2
----------------------------------------------------------------------------------------------------------------------UGUGU-CGGUGG-UG-AU-AGU--A-G-C-AGGG-A-AACGC-CCG-GUC--C--CUUU-CCGAA-CCCGGA-A----GCUAAG-CCUGGU-UACG-CUG-AUG-GU-ACU-GCACUC------GGGA--GG-GUG--UGGG--AGAGUAGG-UUA--CCGCCGA-CC-----------------------------------------------

>Accession:BX927155::SeqID:72755::TaxID:2
----------------------------------------------------------------------------------------------------------------------UGUGU-CGGUGG-UG-AU-AGU--A-G-C-AGGG-A-AACGC-CCG-GUC--C--CUUU-CCGAA-CCCGGA-A----GCUAAG-CCUGGU-UACG-CUG-AUG-GU-ACU-GCACUC------GGGA--GG-GUG--UGGG--AGAGUAGG-UUA--CCGCCGA-CC-----------------------------------------------

>Accession:BX927156::SeqID:72756::TaxID:2
----------------------------------------------------------------------------------------------------------------------UGUGU-CGGUGG-UG-AU-AGU--A-G-C-AGGG-A-AACGC-CCG-GUC--C--CUUU-CCGAA-CCCGGA-A----GCUAAG-CCUGGU-UACG-CUG-AUG-GU-ACU-GCACUC------GGGA--GG-GUG--UGGG--AGAGUAGG-UUA--CCGCCGA-CC-----------------------------------------------

>Accession:CR931997::SeqID:72787::TaxID:2
----------------------------------------------------------------------------------------------------------------------UUUGU-CGGUGG-UU-GUUAGC--G-G-U-GGGG-U-CACGC-CCG-GUC--C--CUUU-CCGAA-CCCGGA-A----GCUAAG-CCUACC-UGCG-CUG-AUG-GU-ACU-GCACCU------GGGA--GG-GUG--UGGG--AGAGUAAG-UCA--CCGCCGG-C------------------------------------------------

>Accession:CR931997::SeqID:72788::TaxID:2
----------------------------------------------------------------------------------------------------------------------UUUGU-CGGUGG-UU-GUUAGC--G-G-U-GGGG-U-CACGC-CCG-GUC--C--CUUU-CCGAA-CCCGGA-A----GCUAAG-CCUACC-UGCG-CUG-AUG-GU-ACU-GCACCU------GGGA--GG-GUG--UGGG--AGAGUAAG-UCA--CCGCCGA-C------------------------------------------------

>Accession:CR931997::SeqID:72789::TaxID:2
----------------------------------------------------------------------------------------------------------------------UUUGU-CGGUGG-UU-GUUAGC--G-G-U-GGGG-U-CACGC-CCG-GUC--C--CUUU-CCGAA-CCCGGA-A----GCUAAG-CCUACC-UGCG-CUG-AUG-GU-ACU-GCACCU------GGGA--GG-GUG--UGGG--AGAGUAAG-UCA--CCGCCGG-C------------------------------------------------

>Accession:M16176::SeqID:72910::TaxID:2
----------------------------------------------------------------------------------------------------------------------UUUGU-CGGUGG-UG-UU-AGC--G-G-U-GGGG-U-CACGC-CCG-GUC--C--CUUU-CCGAA-CCCGGA-A----GCUAAG-CCUGCC-UGCG-CCG-AUG-GU-ACU-GCACCU------GGGA--GG-GUG--UGGGA-GAGUAGGA-CCC--C-GCCGG-CAU----------------------------------------------

>Accession:M16204::SeqID:72919::TaxID:2
----------------------------------------------------------------------------------------------------------------------CGUGU-CGGUGG-UU-AU-AGC--G-G-U-GGGG-U-CACGC-CCG-GUC--C--CAUU-CCGAA-CCCGGA-A----GCUAAG-CCCACC-UGCG-CCG-AUG-GU-ACU-GCACCU------GGGA--GG-GUG--UGGG--AGAGUAGG-UCA--CCGCCGG-CCA----------------------------------------------

>Accession:M16177::SeqID:72920::TaxID:2
----------------------------------------------------------------------------------------------------------------------CGUGU-CGGUGG-UU-AU-AGC--G-G-U-GGGG-U-CACGC-CCG-GUC--C--CAUU-CCGAA-CCCGGA-A----GCUAAG-CCCACC-UGCG-CCG-AUG-GU-ACU-GCACCU------GGGA--GG-GUG--UGGG--AGAGUAGG-UCA--CCGCCGG-CCAA---------------------------------------------

>Accession:AE016960::SeqID:73617::TaxID:2
----------------------------------------------------------------------------------------------------------------------UU-CC-UGGCGG-CC-AU-AGC--G-A-G-CGGG-C-CCCAC-CUG-AUU--C--CAUU-CCGAA-CUCAGA-A----GUGAAA-ACGCUU-AGCG-CCG-AUG-AU-AGU-GUGGG-------UCU----C-CCA--UGCG--AAAGUAGG-UCA--CCGCCAG-GUU----------------------------------------------

>Accession:AE016828::SeqID:73618::TaxID:2
----------------------------------------------------------------------------------------------------------------------UU-CC-UGGCGG-CC-AU-AGC--G-A-G-CGGG-C-CCCAC-CUG-AUU--C--CAUU-CCGAA-CUCAGA-A----GUGAAA-ACGCUU-AGCG-CCG-AUG-AU-AGU-GUGGG-------UCU----C-CCA--UGCG--AAAGUAGG-UCA--CCGCCAG-GUU----------------------------------------------

>Accession:CP000239::SeqID:78220::TaxID:2
----------------------------------------------------------------------------------------------------------------------UG-CC-UGGUGC-CU-AU-GGC--G-A-U-GUGG-A-ACCACGCCG-ACC--C--CAUC-CCGAA-CUCGGA-C----GUGAAA-CGCAUC-AGCG-GCG-AAC-CU-ACU-UGAGGG------GUGA--CC-CUC--CGGU--AACCUAGC-UCG--GUGCCAG-GC-----------------------------------------------

>Accession:CP000239::SeqID:78221::TaxID:2
----------------------------------------------------------------------------------------------------------------------UG-CC-UGGUGC-CU-AU-GGC--G-A-U-GUGG-A-ACCACGCCG-ACC--C--CAUC-CCGAA-CUCGGA-C----GUGAAA-CGCAUC-AGCG-GCG-AAC-CU-ACU-UGAGGG------GUGA--CC-CUC--CGGU--AACCUAGC-UCG--GUGCCAG-GC-----------------------------------------------

>Accession:CP000240::SeqID:78226::TaxID:2
--------------------------------------------------------------------------------------------------------------------------C-UGGUGC-CU-AU-GGC--G-A-U-GUGG-A-ACCACGCCG-AC---C--CAUC-CCGAA-CUCGGA-C----GUGAAA-CGCAUC-AGCG-GCG-AAC-CU-ACU-GGCAGG------GCGA--CC-UGC--UGGC--AACCUAGC-UCG--GUGCCAG-GC-----------------------------------------------

>Accession:CP000240::SeqID:78227::TaxID:2
--------------------------------------------------------------------------------------------------------------------------C-UGGUGC-CU-AU-GGC--G-A-U-GUGG-A-ACCACGCCG-AC---C--CAUC-CCGAA-CUCGGA-C----GUGAAA-CGCAUC-AGCG-GCG-AAC-CU-ACU-GGCAGG------GCGA--CC-UGC--UGGC--AACCUAGC-UCG--GUGCCAG-AC-----------------------------------------------

>Accession:X52298::SeqID:79779::TaxID:2
-----------------------------------------------------------------------------------------------------------------------U-UU-AGGUGC-CU-AU-AUC--G-G-U-GGU--G-UCCAC-CUC-UUC--C--CAUU-CCGAA-CAGAGA-A----GUUAAG-CCCACC-AGAG-CCG-AUG-GU-ACU-GCGG--------UAAS---A-CGU--GGG---AGAGUAGG-UCG--GUGCCAA-AU-----------------------------------------------

>Accession:X52297::SeqID:79780::TaxID:2
--------------------------------------------------------------------------------------------------------------------------C-CGGUGG-CA-AU-GUC--G-G-A-GGGG-U-CCCAC-CCG-UUC--C--CAUC-CCGAA-CACGGA-A----GUUAAG-CCCUCC-AGAG-CCG-AUG-GU-ACU-CCGCGG------GAAA--CC-GCGC-GGG---AGAGUAGG-UCG--CUGCCGG-AU-----------------------------------------------

>Accession:X55267::SeqID:80360::TaxID:2
-----------------------------------------------------------------------------------------------------------------------G-UUACGGCGG-CC-AU-AGC--G-G-A-GGGG-A-AACGC-CCG-GUC--C--CAUU-CCGAA-CCCGGA-A----GCUAAG-CCCUCC-AGCG-CCG-AUG-GU-ACU-GCACCC------GAGA--GA-GUG--UGGG--AGAGUAGG-ACG--CCGCCGG-ACAA---------------------------------------------

>Accession:CP000089::SeqID:81691::TaxID:2
-------------------------------------------------------------------------------------------------------------------------UC-UGGCGU-CA-AU-AGC--C-U-G-CUGG-U-ACCAC-CCC-UUC--C--CUUC-CCGAA-CAGGAC-C----GUGAAA-CAGCAU-CGCG-CCA-AUG-AU-AGU-GAGC-------UUACC-----GCU--CGCG--AAAGUAGG-UCA--ACGCCAG-AC-----------------------------------------------

>Accession:CP000089::SeqID:81692::TaxID:2
-------------------------------------------------------------------------------------------------------------------------UC-UGGCGU-CA-AU-AGC--C-U-G-CUGG-U-ACCAC-CCC-UUC--C--CUUC-CCGAA-CAGGAC-C----GUGAAA-CAGCAU-CGCG-CCA-AUG-AU-AGU-GAGC-------UUACC-----GCU--CGCG--AAAGUAGG-UCA--ACGCCAG-AC-----------------------------------------------

>Accession:CP000089::SeqID:81693::TaxID:2
-------------------------------------------------------------------------------------------------------------------------UC-UGGCGU-CA-AU-AGC--C-U-G-CUGG-U-ACCAC-CCC-UUC--C--CUUC-CCGAA-CAGGAC-C----GUGAAA-CAGCAU-CGCG-CCA-AUG-AU-AGU-GAGC-------UUACC-----GCU--CGCG--AAAGUAGG-UCA--ACGCCAG-AC-----------------------------------------------

>Accession:CP000089::SeqID:81694::TaxID:2
-------------------------------------------------------------------------------------------------------------------------UC-UGGCGU-CA-AU-AGC--C-U-G-CUGG-U-ACCAC-CCC-UUC--C--CUUC-CCGAA-CAGGAC-C----GUGAAA-CAGCAU-CGCG-CCA-AUG-AU-AGU-GAGC-------UUACC-----GCU--CGCG--AAAGUAGG-UCA--ACGCCAG-AC-----------------------------------------------

>Accession:CP000027::SeqID:81759::TaxID:2
---------------------------------------------------------------------------------------------------------------------UCC-CC-CGGUGG-UU-AG-AGC--G-G-G-GUGG-U-ACCAC-CCG-UUC--C--CGUC-CCGAA-CACGGU-C----GUGAAA-CGCCCC-AGCG-CAG-ACG-AU-ACU-UAGGAG------GCAA--CU-CCU--UGUG-GAAAAUAUG-CCA--CUGCCCG-GGGA---------------------------------------------

>Accession:AJ965256::SeqID:81765::TaxID:2
---------------------------------------------------------------------------------------------------------------------UCC-CC-UGGUGG-UU-AG-AGC--G-G-G-GUGG-U-ACCAC-CCG-UUC--C--CGUC-CCGAA-CACGGU-C----GUGAAA-CGCCCC-AGCG-CAG-ACG-AU-ACU-UAGGAG------GCAA--CU-CCU--UGUG-GAAAAUAUG-CCA--CUGCCCG-GGGA---------------------------------------------

>Accession:AE002057::SeqID:81808::TaxID:2
--------------------------------------------------------------------------------------------------------------------ACAC-CC-CCGUGC-CC-AU-AGC--A-C-U-GUGG-A-ACCAC-CCC-ACC--C--CAUG-CCGAA-CUGGGU-C----GUGAAA-CACAGC-AGCG-CCA-AUG-AU-ACU-CGGACC------GCAG--GG-UCC--CGGA--AAAGUCGG-UCA--GCGCGGG-GGUUU--------------------------------------------

>Accession:AE002087::SeqID:81809::TaxID:2
--------------------------------------------------------------------------------------------------------------------ACAC-CC-CCGUGC-CC-AU-AGC--A-C-U-GUGG-A-ACCAC-CCC-ACC--C--CAUG-CCGAA-CUGGGU-C----GUGAAA-CACAGC-AGCG-CCA-AUG-AU-ACU-CGGACC------GCAG--GG-UCC--CGGA--AAAGUCGG-UCA--GCGCGGG-GGUUU--------------------------------------------

>Accession:AE001887::SeqID:81810::TaxID:2
--------------------------------------------------------------------------------------------------------------------ACAC-CC-CCGUGC-CC-AU-AGC--A-C-U-GUGG-A-ACCAC-CCC-ACC--C--CAUG-CCGAA-CUGGGU-C----GUGAAA-CACAGC-AGCG-CCA-AUG-AU-ACU-CGGACC------GCAG--GG-UCC--CGGA--AAAGUCGG-UCA--GCGCGGG-GGUUU--------------------------------------------

>Accession:X52300::SeqID:81811::TaxID:2
--------------------------------------------------------------------------------------------------------------------AUAC-CC-CCGUGC-CU-UU-AGC--G-C-C-UCGG-A-ACCAC-CCC-ACU--C--CAUG-CCGAA-CUGGGU-C----GUGAAA-CGUGGC-AGCG-CCU-AUG-AU-ACU-UGGACC------GCAG--GG-UCC--UGGA--AAAGUCGG-UGCA-GUGCGGG-GGUUU--------------------------------------------

>Accession:AE000513::SeqID:81822::TaxID:2
--------------------------------------------------------------------------------------------------------------------ACAC-CC-CCGUGC-CC-AU-AGC--A-C-U-GUGG-A-ACCAC-CCC-ACC--C--CAUG-CCGAA-CUGGGU-C----GUGAAA-CACAGC-AGCG-CCA-AUG-AU-ACU-CGGACC------GCAG--GG-UCC--CGGA--AAAGUCGG-UCA--GCGCGGG-GGUUU--------------------------------------------

>Accession:AE000513::SeqID:81823::TaxID:2
--------------------------------------------------------------------------------------------------------------------ACAC-CC-CCGUGC-CC-AU-AGC--A-C-U-GUGG-A-ACCAC-CCC-ACC--C--CAUG-CCGAA-CUGGGU-C----GUGAAA-CACAGC-AGCG-CCA-AUG-AU-ACU-CGGACC------GCAG--GG-UCC--CGGA--AAAGUCGG-UCA--GCGCGGG-GGUUU--------------------------------------------

>Accession:AE000513::SeqID:81824::TaxID:2
--------------------------------------------------------------------------------------------------------------------ACAC-CC-CCGUGC-CC-AU-AGC--A-C-U-GUGG-A-ACCAC-CCC-ACC--C--CAUG-CCGAA-CUGGGU-C----GUGAAA-CACAGC-AGCG-CCA-AUG-AU-ACU-CGGACC------GCAG--GG-UCC--CGGA--AAAGUCGG-UCA--GCGCGGG-GGUUU--------------------------------------------

>Accession:X52299::SeqID:81831::TaxID:2
--------------------------------------------------------------------------------------------------------------------AUAC-CC-CCGUGC-CG-UG-AGC--G-C-C-UCGG-A-ACCAC-CCC-ACU--C--CAUG-CCGAA-CUGGGU-C----GUGAAA-CGUGGC-AGCG-CCU-AUG-AU-ACU-UGGACC------GCAG--GG-UCC--UGGG--AAAGUCGG-UGCA-GUGCGGG-GGUUU--------------------------------------------

>Accession:AJ131594::SeqID:81923::TaxID:2
----------------------------------------------------------------------------------------------------------------------UG-CC-UGAUGA-CC-AU-AGC--A-A-G-UUGG-U-ACCAC-UCC-UUC--C--CAUC-CCGAA-CAGGAC-A----GUGAAA-CGACUU-UGCG-CCG-AUG-AU-AGU-GCGG--------GUUC-----CCG--UGUG--AAAGUAGG-UCA--UCGUCAG-GC-----------------------------------------------

>Accession:CR522870::SeqID:83500::TaxID:2
----------------------------------------------------------------------------------------------------------------------UU-UU-CGGUGG-CC-AU-AGC--G-A-A-GAGG-C-CCCAC-CCG-UUC--C--CAUU-CCGAA-CACGGA-A----GUUAAG-CUCUUC-AGCG-CCG-AUG-GU-ACU-GCAUGG------GAGA--CU-GUG--UGGG--AGAGUAGG-UCG--CCGCCGA-AUUU---------------------------------------------

>Accession:CR522870::SeqID:83501::TaxID:2
----------------------------------------------------------------------------------------------------------------------UU-UU-CGGUGG-CC-AU-AGC--G-A-A-GAGG-C-UCCAC-CCG-UUC--C--CAUU-CCGAA-CACGGA-A----GUUAAG-CUCUUC-AGCG-CCG-AUG-GU-ACU-GCAUGG------GAGA--CU-GUG--UGGG--AGAGUAGG-UCG--CCGCCGA-AUUU---------------------------------------------

>Accession:CR522870::SeqID:83502::TaxID:2
----------------------------------------------------------------------------------------------------------------------UU-UU-CGGUGG-CC-AU-AGC--G-A-A-GAGG-C-UCCAC-CCG-UUC--C--CAUU-CCGAA-CACGGA-A----GUUAAG-CUCUUC-AGCG-CCG-AUG-GU-ACU-GCAUGG------GAGA--CU-GUG--UGGG--AGAGUAGG-UCG--CCGCCGA-AUUU---------------------------------------------

>Accession:CR522870::SeqID:83503::TaxID:2
----------------------------------------------------------------------------------------------------------------------UU-UU-CGGUGG-CC-AU-AGC--G-A-A-GAGG-C-UCCAC-CCG-UUC--C--CAUU-CCGAA-CACGGA-A----GUUAAG-CUCUUC-AGCG-CCG-AUG-GU-ACU-GCAUGG------GAGA--CU-GUG--UGGG--AGAGUAGG-UCG--CCGCCGA-AUUU---------------------------------------------

>Accession:CR522870::SeqID:83504::TaxID:2
----------------------------------------------------------------------------------------------------------------------UU-UU-CGGUGG-CC-AU-AGC--G-A-A-GAGG-C-UCCAC-CCG-UUC--C--CAUU-CCGAA-CACGGA-A----GUUAAG-CUCUUC-AGCG-CCG-AUG-GU-ACU-GCAUGG------GAGA--CU-GUG--UGGG--AGAGUAGG-UCG--CCGCCGA-AUUU---------------------------------------------

>Accession:CR522870::SeqID:83505::TaxID:2
----------------------------------------------------------------------------------------------------------------------UU-UU-CGGUGG-CC-AU-AGC--G-A-A-GAGG-C-UCCAC-CCG-UUC--C--CAUU-CCGAA-CACGGA-A----GUUAAG-CUCUUC-AGCG-CCG-AUG-GU-ACU-GCAUGG------GAGA--CU-GUG--UGGG--AGAGUAGG-UCG--CCGCCGA-AUUU---------------------------------------------

>Accession:CR522870::SeqID:83506::TaxID:2
----------------------------------------------------------------------------------------------------------------------UU-UU-CGGUGG-CC-AU-AGC--G-A-A-GAGG-C-UCCAC-CCG-UUC--C--CAUU-CCGAA-CACGGA-A----GUUAAG-CUCUUC-AGCG-CCG-AUG-GU-ACU-GCAUGG------GAGA--CU-GUG--UGGG--AGAGUAGG-UCG--CCGCCGA-AUUU---------------------------------------------

>Accession:CR522870::SeqID:83507::TaxID:2
----------------------------------------------------------------------------------------------------------------------UU-UU-CGGUGG-CC-AU-AGC--G-A-A-GAGG-C-UCCAC-CCG-UUC--C--CAUU-CCGAA-CACGGA-A----GUUAAG-CUCUUC-AGCG-CCG-AUG-GU-ACU-GCAUGG------GAGA--CU-GUG--UGGG--AGAGUAGG-UCG--CCGCCGA-AUUU---------------------------------------------

>Accession:CP000112::SeqID:83597::TaxID:2
--------------------------------------------------------------------------------------------------------------------------------------------------------------------------C--CAUU-CCGAA-CUCGGA-A----GUUAAG-CCAGCC-AUCG-CCG-AUG-AU-ACU-GCAAG-------GGAG---C-UUG--UGGG--AAA--------------------------------------------------------------------

>Accession:CP000112::SeqID:83598::TaxID:2
-------------------------------------------------------------------------------------------------------------------------CU-UGGUGA-CC-AU-GGA--G-G-C-UGGG-G-UACAC-CCG-AUC--C--CAUU-CCGAA-CUCGGA-A----GUUAAG-CCAGCC-AUCG-CCG-AUG-AU-ACU-GCAAG-------GGAG---C-UUG--UGGG--AAA--------------------------------------------------------------------

>Accession:CP000112::SeqID:83599::TaxID:2
-------------------------------------------------------------------------------------------------------------------------CU-UGGUGA-CC-AU-GGA--G-G-C-UGGG-G-UACAC-CCG-AUC--C--CAUU-CCGAA-CUCGGA-A----GUUAAG-CCAGCC-AUCG-CCG-AUG-AU-ACU-GCAAG-------GGAG---C-UUG--UGGG--AAAGUAGG-CCG--UCGCCAA-G------------------------------------------------

>Accession:CP000112::SeqID:83600::TaxID:2
-------------------------------------------------------------------------------------------------------------------------CU-UGGUGA-CC-AU-GGA--G-G-C-UGGG-G-UACAC-CCG-AUC--C--CAUU-CCGAA-CUCGGA-A----GUUAAG-CCAGCC-AUCG-CCG-AUG-AU-ACU-GCAAG-------GGAG---C-UUG--UGGG--AAAGUAGG-CCG--UCGCCAA-G------------------------------------------------

>Accession:M32519::SeqID:83730::TaxID:2
---------------------------------------------------------------------------------------------------------------------UAG-CC-UGGCGU-CC-AU-GGA--G-G-A-GGGG-G-CACAC-CUG-AUC--C--CAUU-CCGAA-CUCGGA-A----GUUAAG-CCCUCC-AUCG-CCG-AUG-AU-ACU-GCGGG-------GUAG---C-UCG--UGGG--AAAGUAGG-CCG--ACGCCAG-GACU---------------------------------------------

>Accession:AE017285::SeqID:83739::TaxID:2
-------------------------------------------------------------------------------------------------------------------------CC-UGGCGU-CC-AU-GGA--G-G-A-GGGG-G-UACAC-CCG-AUC--C--CAUU-CCGAA-CUCGGA-A----GUUAAG-CCCUCC-AUCG-CCG-AUG-AU-ACU-GCGGG-------GUAG---C-UCG--UGGG--AAAGUAGG-CCG--ACGCCAG-GACU---------------------------------------------

>Accession:AE017285::SeqID:83740::TaxID:2
-------------------------------------------------------------------------------------------------------------------------CC-UGGCGU-CC-AU-GGA--G-G-A-GGGG-G-UACAC-CCG-AUC--C--CAUU-CCGAA-CUCGGA-A----GUUAAG-CCCUCC-AUCG-CCG-AUG-AU-ACU-GCGGG-------GUAG---C-UCG--UGGG--AAAGUAGG-CCG--ACGCCAG-GACU---------------------------------------------

>Accession:AE017285::SeqID:83741::TaxID:2
-------------------------------------------------------------------------------------------------------------------------CC-UGGCGU-CC-AU-GGA--G-G-A-GGGG-G-UACAC-CCG-AUC--C--CAUU-CCGAA-CUCGGA-A----GUUAAG-CCCUCC-AUCG-CCG-AUG-AU-ACU-GCGGG-------GUAG---C-UCG--UGGG--AAAGUAGG-CCG--ACGCCAG-GACU---------------------------------------------

>Accession:AE017285::SeqID:83742::TaxID:2
-------------------------------------------------------------------------------------------------------------------------CC-UGGCGU-CC-AU-GGA--G-G-A-GGGG-G-UACAC-CCG-AUC--C--CAUU-CCGAA-CUCGGA-A----GUUAAG-CCCUCC-AUCG-CCG-AUG-AU-ACU-GCGGG-------GUAG---C-UCG--UGGG--AAAGUAGG-CCG--ACGCCAG-GACU---------------------------------------------

>Accession:AE017285::SeqID:83743::TaxID:2
-------------------------------------------------------------------------------------------------------------------------CC-UGGCGU-CC-AU-GGA--G-G-A-GGGG-G-UACAC-CCG-AUC--C--CAUU-CCGAA-CUCGGA-A----GUUAAG-CCCUCC-AUCG-CCG-AUG-AU-ACU-GCGGG-------GUAG---C-UCG--UGGG--AAAGUAGG-CCG--ACGCCAG-GACU---------------------------------------------

>Accession:AE017309::SeqID:83744::TaxID:2
-------------------------------------------------------------------------------------------------------------------------CC-UGGCGU-CC-AU-GGA--G-G-A-GGGG-G-UACAC-CCG-AUC--C--CAUU-CCGAA-CUCGGA-A----GUUAAG-CCCUCC-AUCG-CCG-AUG-AU-ACU-GCGGG-------GUAG---C-UCG--UGGG--AAAGUAGG-CCG--ACGCCAG-GACU---------------------------------------------

>Accession:AE017309::SeqID:83745::TaxID:2
-------------------------------------------------------------------------------------------------------------------------CC-UGGCGU-CC-AU-GGA--G-G-A-GGGG-G-UACAC-CCG-AUC--C--CAUU-CCGAA-CUCGGA-A----GUUAAG-CCCUCC-AUCG-CCG-AUG-AU-ACU-GCGGG-------GUAG---C-UCG--UGGG--AAAGUAGG-CCG--ACGCCAG-GACU---------------------------------------------

>Accession:AE017317::SeqID:83746::TaxID:2
-------------------------------------------------------------------------------------------------------------------------CC-UGGCGU-CC-AU-GGA--G-G-A-GGGG-G-UACAC-CCG-AUC--C--CAUU-CCGAA-CUCGGA-A----GUUAAG-CCCUCC-AUCG-CCG-AUG-AU-ACU-GCGGG-------GUAG---C-UCG--UGGG--AAAGUAGG-CCG--ACGCCAG-GACU---------------------------------------------

>Accession:AE017317::SeqID:83747::TaxID:2
-------------------------------------------------------------------------------------------------------------------------CC-UGGCGU-CC-AU-GGA--G-G-A-GGGG-G-UACAC-CCG-AUC--C--CAUU-CCGAA-CUCGGA-A----GUUAAG-CCCUCC-AUCG-CCG-AUG-AU-ACU-GCGGG-------GUAG---C-UCG--UGGG--AAAGUAGG-CCG--ACGCCAG-GACU---------------------------------------------

>Accession:AE017319::SeqID:83748::TaxID:2
-------------------------------------------------------------------------------------------------------------------------CC-UGGCGU-CC-AU-GGA--G-G-A-GGGG-G-UACAC-CCG-AUC--C--CAUU-CCGAA-CUCGGA-A----GUUAAG-CCCUCC-AUCG-CCG-AUG-AU-ACU-GCGGG-------GUAG---C-UCG--UGGG--AAAGUAGG-CCG--ACGCCAG-GACU---------------------------------------------

>Accession:X05053::SeqID:89867::TaxID:2
----------------------------------------------------------------------------------------------------------------------UA-CC-UGGCGG-CC-AU-GGC--G-A-A-CCGG-A-ACCAC-CCG-AUC--C--CAUC-UCGAA-CUCGGA-A----GUGAAA-CGGUUC-AGCG-CCG-AUG-AU-AGU-GUGGGG------CCU---CC-CCA--UGUG--AAAGUAGG-UCA--CUGCCAG-GCAC---------------------------------------------

>Accession:CP000107::SeqID:90074::TaxID:2
----------------------------------------------------------------------------------------------------------------------GG-GU-UGGUGG-UA-AU-AGC--G-G-A-AGUG-G-UACAC-CCA-GCUU-A--CAUU-UCGAA-CCUGGA-A----GUUAAG-CCUUCU-AGCG-CUG-AUG-GU-ACU-UUGUC-------UUAA---G-GCA--CGGG--AGAGUAAG-UCA--CUGCCAC-CCUU---------------------------------------------

>Accession:AF416765::SeqID:90078::TaxID:2
----------------------------------------------------------------------------------------------------------------------GG-GU-UGGUGG-UA-AU-AGC--G-G-A-AGUG-G-UACAC-CCA-GCUU-A--CAUU-UCGAA-CCUGGA-A----GUUAAG-CCUUCU-AGCG-CUG-AUG-GU-ACU-UUGUC-------UUAA---G-ACA--UGGG--AGAGUAAG-UCA--CUGCCAC-CCUU---------------------------------------------

>Accession:CP000236::SeqID:90083::TaxID:2
----------------------------------------------------------------------------------------------------------------------GG-GU-UGGUGG-UA-AU-AGC--G-G-A-AGUG-G-UACAC-CCA-GCUU-A--CAUU-UCGAA-CCUGGA-A----GUUAAG-CCUUCU-AGCG-CUG-AUG-GU-ACU-UUGUC-------UUAA---G-ACA--UGGG--AGA--------------------------------------------------------------------

>Accession:CR767821::SeqID:90091::TaxID:2
----------------------------------------------------------------------------------------------------------------------GG-GU-UGGUGG-UA-AU-AGC--A-G-A-AGUG-A-UACAC-CCA-GCU--A--CAUU-UCGAA-CCUGGA-A----GUUAAG-CCUUCU-AGCG-CUU-AUG-GU-ACU-UUGUC-------UUAA---G-GCA--CGGG--AGAGUAGG-UCG--CUGCCAC-CCUU---------------------------------------------

>Accession:CR925677::SeqID:90098::TaxID:2
----------------------------------------------------------------------------------------------------------------------GG-GU-UGGUGG-UA-AU-AGC--A-G-A-AGUG-A-UACAC-CCA-GCU--A--CAUU-UCGAA-CCUGGA-A----GUUAAG-CCUUCU-AGCG-CUU-AUG-GU-ACU-UUGUC-------UUAA---G-GCA--CGGG--AGA--------------------------------------------------------------------

>Accession:CR925678::SeqID:90101::TaxID:2
----------------------------------------------------------------------------------------------------------------------GG-GU-UGGUGG-UA-AU-AGC--A-G-A-AGUG-A-UACAC-CCA-GCU--A--CAUU-UCGAA-CCUGGA-A----GUUAAG-CCUUCU-AGCG-CUU-AUG-GU-ACU-UUGUC-------UUAA---G-GCA--CGGG--AGA--------------------------------------------------------------------

>Accession:M33888::SeqID:91714::TaxID:2
----------------------------------------------------------------------------------------------------------------------UU-UA-CGGCGG-CC-AU-AGC--G-G-C-AGGG-A-AACGC-CCG-GUC--C--CAUU-CCGAA-CCCGGA-A----GCUAAG-CCUGCC-AGCG-CCG-AUG-GU-ACU-GCACUC------GUGA--GG-GUG--UGGG--AGAGUAGG-UCA--CCGCCGA-ACAC---------------------------------------------

>Accession:X02027::SeqID:92855::TaxID:2
-------------------------------------------------------------------------------------------------------------------------UG-UGGUGG-CG-AU-AGC--G-A-G-AAGG-A-UACAC-CUG-UAA--C--CAUG-CCGAA-CACAGA-A----GUUAAG-CUUCUU-AGCG-CCG-AUU-GU-AGU-GAGGGG------GUUG--CC-CCU--UGUG--AGAGUAGG-ACG--UCGCCAC-G-C----------------------------------------------

>Accession:AE016947::SeqID:92906::TaxID:2
-------------------------------------------------------------------------------------------------------------------------UG-UGGUGG-CG-AU-AGC--G-A-G-AAGG-A-UACAC-CUG-UUC--C--CAUG-CCGAA-CACAGA-A----GUUAAG-CUUCUU-AGCG-CCG-AUU-GU-AGU-GAAGGG------UUU---CC-CUU--UGUG--AGAGUAGG-ACG--UCGCCAC-G-C----------------------------------------------

>Accession:AE016950::SeqID:92907::TaxID:2
-------------------------------------------------------------------------------------------------------------------------UG-UGGUGG-CG-AU-AGC--G-A-G-AAGG-A-UACAC-CUG-UUC--C--CAUG-CCGAA-CACAGA-A----GUUAAG-CUUCUU-AGCG-CCG-AUU-GU-AGU-GAAGGG------UUU---CC-CUU--UGUG--AGAGUAGG-ACG--UCGCCAC-G-C----------------------------------------------

>Accession:AE016956::SeqID:92908::TaxID:2
-------------------------------------------------------------------------------------------------------------------------UG-UGGUGG-CG-AU-AGC--G-A-G-AAGG-A-UACAC-CUG-UUC--C--CAUG-CCGAA-CACAGA-A----GUUAAG-CUUCUU-AGCG-CCG-AUU-GU-AGU-GAAGGG------UUU---CC-CUU--UGUG--AGAGUAGG-ACG--UCGCCAC-G-C----------------------------------------------

>Accession:AE016957::SeqID:92909::TaxID:2
-------------------------------------------------------------------------------------------------------------------------UG-UGGUGG-CG-AU-AGC--G-A-G-AAGG-A-UACAC-CUG-UUC--C--CAUG-CCGAA-CACAGA-A----GUUAAG-CUUCUU-AGCG-CCG-AUU-GU-AGU-GAAGGG------UUU---CC-CUU--UGUG--AGAGUAGG-ACG--UCGCCAC-G-C----------------------------------------------

>Accession:AE016830::SeqID:92910::TaxID:2
-------------------------------------------------------------------------------------------------------------------------UG-UGGUGG-CG-AU-AGC--G-A-G-AAGG-A-UACAC-CUG-UUC--C--CAUG-CCGAA-CACAGA-A----GUUAAG-CUUCUU-AGCG-CCG-AUU-GU-AGU-GAAGGG------UUU---CC-CUU--UGUG--AGAGUAGG-ACG--UCGCCAC-G-C----------------------------------------------

>Accession:AE016830::SeqID:92911::TaxID:2
-------------------------------------------------------------------------------------------------------------------------UG-UGGUGG-CG-AU-AGC--G-A-G-AAGG-A-UACAC-CUG-UUC--C--CAUG-CCGAA-CACAGA-A----GUUAAG-CUUCUU-AGCG-CCG-AUU-GU-AGU-GAAGGG------UUU---CC-CUU--UGUG--AGAGUAGG-ACG--UCGCCAC-G-C----------------------------------------------

>Accession:AE016830::SeqID:92912::TaxID:2
-------------------------------------------------------------------------------------------------------------------------UG-UGGUGG-CG-AU-AGC--G-A-G-AAGG-A-UACAC-CUG-UUC--C--CAUG-CCGAA-CACAGA-A----GUUAAG-CUUCUU-AGCG-CCG-AUU-GU-AGU-GAAGGG------UUU---CC-CUU--UGUG--AGAGUAGG-ACG--UCGCCAC-G-C----------------------------------------------

>Accession:AE016830::SeqID:92913::TaxID:2
-------------------------------------------------------------------------------------------------------------------------UG-UGGUGG-CG-AU-AGC--G-A-G-AAGG-A-UACAC-CUG-UUC--C--CAUG-CCGAA-CACAGA-A----GUUAAG-CUUCUU-AGCG-CCG-AUU-GU-AGU-GAAGGG------UUU---CC-CUU--UGUG--AGAGUAGG-ACG--UCGCCAC-G-C----------------------------------------------

>Accession:BX950851::SeqID:95435::TaxID:2
----------------------------------------------------------------------------------------------------------------------UG-CC-UGGCGG-CG-AU-AGC--G-C-G-GUGG-U-CCCAC-CUG-ACC--C--CAUG-CCGAA-CUCAGA-A----GUGAAA-CGCCGU-AGCG-CCG-AUG-GU-AGU-GUGGGG------UCU---CC-CCA--UGUG--AGAGUAGG-GAA--CUGCCAG-GCAU---------------------------------------------

>Accession:BX950851::SeqID:95436::TaxID:2
----------------------------------------------------------------------------------------------------------------------UG-CC-UGGCGG-CG-AU-AGC--G-C-G-GUGG-U-CCCAC-CUG-ACC--C--CAUG-CCGAA-CUCAGA-A----GUGAAA-CGCCGU-AGCG-CCG-AUG-GU-AGU-GUGGGG------UCU---CC-CCA--UGUG--AGAGUAGG-GAA--CUGCCAG-GCAU---------------------------------------------

>Accession:BX950851::SeqID:95437::TaxID:2
----------------------------------------------------------------------------------------------------------------------UG-CC-UGGCGG-CG-AU-AGC--G-C-G-GUGG-U-CCCAC-CUG-ACC--C--CAUG-CCGAA-CUCAGA-A----GUGAAA-CGCCGU-AGCG-CCG-AUG-GU-AGU-GUGGGG------UCU---CC-CCA--UGUG--AGAGUAGG-GAA--CUGCCAG-GCAU---------------------------------------------

>Accession:BX950851::SeqID:95438::TaxID:2
----------------------------------------------------------------------------------------------------------------------UG-CC-UGGCGG-CG-AU-AGC--G-C-G-GUGG-U-CCCAC-CUG-ACC--C--CAUG-CCGAA-CUCAGA-A----GUGAAA-CGCCGU-AGCG-CCG-AUG-GU-AGU-GUGGGG------UCU---CC-CCA--UGUG--AGAGUAGG-GAA--CUGCCAG-GCAU---------------------------------------------

>Accession:BX950851::SeqID:95439::TaxID:2
----------------------------------------------------------------------------------------------------------------------UG-CC-UGGCGG-CG-AU-AGC--G-C-G-GUGG-U-CCCAC-CUG-ACC--C--CAUG-CCGAA-CUCAGA-A----GUGAAA-CGCCGU-AGCG-CCG-AUG-GU-AGU-GUGGGG------UCU---CC-CCA--UGUG--AGAGUAGG-GAA--CUGCCAG-GCAU---------------------------------------------

>Accession:BX950851::SeqID:95440::TaxID:2
----------------------------------------------------------------------------------------------------------------------UG-CC-UGGCGG-CG-AU-AGC--G-C-G-GUGG-U-CCCAC-CUG-ACC--C--CAUG-CCGAA-CUCAGA-A----GUGAAA-CGCCGU-AGCG-CCG-AUG-GU-AGU-GUGGGG------UCU---CC-CCA--UGUG--AGAGUAGG-GAA--CUGCCAG-GCAU---------------------------------------------

>Accession:BX950851::SeqID:95441::TaxID:2
----------------------------------------------------------------------------------------------------------------------UG-CC-UGGCGG-CG-AU-AGC--G-C-G-GUGG-U-CCCAC-CUG-ACC--C--CAUG-CCGAA-CUCAGA-A----GUGAAA-CGCCGU-AGCG-CCG-AUG-GU-AGU-GUGGGG------UCU---CC-CCA--UGUG--AGAGUAGG-GAA--CUGCCAG-GCAU---------------------------------------------

>Accession:BX950851::SeqID:95442::TaxID:2
---------------------------------------------------------------------------------------------------------------------UUA-CC-UGGCGG-CG-AU-AGC--G-C-G-GUGG-U-CCCAC-CUG-ACC--C--CAUG-CCGAA-CUCAGA-A----GUGAAA-CGCCGU-AGCG-CCG-AUG-GU-AGU-GUGGGG------UCU---CC-CCA--UGUG--AGAGUAGG-GAA--CUGCCAG-GUUU---------------------------------------------

>Accession:AB019250::SeqID:95538::TaxID:2
-------------------------------------------------------------------------------------------------------------------------UC-UGGUGG-UU-UU-AGC--G-A-A-GUGG-U-CACAC-CUG-UUC--C--CAUC-UCGAA-CACAGA-A----GUUAAG-CACUUU-AGCG-GCG-ACA-AU-AUC-UAGC----C---AAGC-----GCU--AGuG--AaGAUAGU-UCA--UCGCCAG-GU-----------------------------------------------

>Accession:AB019248::SeqID:95544::TaxID:2
-------------------------------------------------------------------------------------------------------------------------UC-UGGUGA-UU-UG-AGC--G-A-A-GUGG-U-CACAC-CUG-UUC--C--CAUC-UCGAA-CACAGA-A----GUUAAG-CACUUU-AGCG-GCG-AC--AA-UAU--CUAGC------CAC---GC-GCU--AGUG--AAGAUAGU-UCA--UUGCCAG-GU-----------------------------------------------

>Accession:X03905::SeqID:95804::TaxID:2
---------------------------------------------------------------------------------------------------------------------UUG-CU-UGGUGG-UC-CU-AGC--G-A-C-UGUG-A-CCCAC-CCG-AUC--C--CAUC-UCGAA-CUCGGC-C----GUGAAA-CCAGUU-AGCG-CCG-AUG-GU-ACU-AUGUC-------UUAA---G-GCA--UGGA--AGAGUAGG-U-G--CCGCCAG-GCAU---------------------------------------------

>Accession:L37445::SeqID:95858::TaxID:2
---------------------------------------------------------------------------------------------------------------------UGC-UU-GGCUGG-UA-UA-GGC--G-U-C-UGAA-C-CGAAC-CCG-AUC--C--CAUC-UCGAA-CUCGGC-C----GGUAAA-UCAGAC-AGCG-CCG-AUG-GU-ACU-AACGC-------UGAA---G-CGU--UGGA--AGAGUAGG-UCG--UUGUCCA-AGCU---------------------------------------------

>Accession:X52363::SeqID:95950::TaxID:2
----------------------------------------------------------------------------------------------------------------------------UGGCGG-CC-GU-AGC--G-C-G-GUGG-U-CCCAC-CUG-ACC--C--CAUG-CCGAA-CUCAGA-A----GUGAAA-CGCCGU-AGCG-CCG-AUG-GU-AGU-GUGGGG------UCU---CC-CCA--UGCG--AGAGUAGG-GAA--CUGCCAG-GCAU---------------------------------------------

>Accession:X00162::SeqID:95951::TaxID:2
----------------------------------------------------------------------------------------------------------------------UG-CC-UGGCGG-CC-GU-AGC--G-C-G-GUGG-U-CCCAC-CUG-ACC--C--CAUG-CCGAA-CUCAGA-A----GUGAAA-CGCCGU-AGCU-CCG-AUG-GU-AGU-GUGGGG------UCU---CC-CCA--UGCG--AGAGUAGG-GAA--CUGCCAG-A------------------------------------------------

>Accession:U18997::SeqID:95952::TaxID:2
----------------------------------------------------------------------------------------------------------------------UG-UC-UGGCGG-CA-GU-AGC--G-C-G-GUGG-U-CCCAC-CUG-ACC--C--CAUG-CCGAA-CUCAGA-A----GUGAAACCGCCGU-AGCG-CCG-AUG-GU-AGU-GUGGGG------UCU---CC-CCA--UGCG--AGAGUAGG-GAA--CUGCCAG-A------------------------------------------------

>Accession:J01695::SeqID:95953::TaxID:2
----------------------------------------------------------------------------------------------------------------------UG-CC-UGGCGG-CA-GU-AGC--G-C-G-GUGG-U-CCCAC-CUG-ACC--C--CAUG-CCGAA-CUCAGA-A----GUGAAA-CGCCGU-AGCG-CCG-AUG-GU-AGU-GUGGGG------UCU---CC-CCA--UGCG--AGAGUAGG-GAA--CUGCCAG-GCAU---------------------------------------------

>Accession:V00336::SeqID:95954::TaxID:2
----------------------------------------------------------------------------------------------------------------------UG-CC-UGGCGG-CC-GU-AGC--G-C-G-GUGG-U-CCCAC-CUG-ACC--C--CAUG-CCGAA-CUCAGA-A----GUGAAA-CGCCGU-AGCG-CCG-AUG-GU-AGU-GUGGGG------UCU---CC-CCA--UGCG--AGAGUAGG-GAA--CUGCCAG-GCAU---------------------------------------------

>Accession:X00414::SeqID:95955::TaxID:2
----------------------------------------------------------------------------------------------------------------------UG-CC-UGGCGG-CC-GU-AGC--G-C-G-GUGG-U-CCCAC-CUG-ACC--C--CAUG-CCGAA-CUCAGA-A----GUGAAA-CGCCGU-AGCG-CCG-AUG-GU-AGU-GUGGGG------UCU---CC-CCA--UGCG--AGAGUAGG-GAA--CUGCCAG-GCAU---------------------------------------------

>Accession:K02180::SeqID:95956::TaxID:2
----------------------------------------------------------------------------------------------------------------------UG-CC-UGGCGG-CC-GU-AGC--G-C-G-GUGG-U-CCCAC-CUG-ACC--C--CAUG-CCGAA-CUCAGA-A----GUGAAA-CGCCGU-AGCG-CCG-AUG-GU-AGU-GUGGGG------UCU---CC-CCA--UGCG--AGAGUAGG-GAA--CUGCCAG-ACAU---------------------------------------------

>Accession:M24300::SeqID:95957::TaxID:2
----------------------------------------------------------------------------------------------------------------------UG-CC-UGGCGG-CC-GU-AGC--G-C-G-GUGG-U-CCCAC-CUG-ACC--C--CAUG-CCGAA-CUCAGA-A----GUGAAA-CGCCGU-AGCG-CCG-AUG-GU-AGU-GUGGGG------UCU---CC-CCA--UGCG--AGAGUAGG-GAA--CUGCCAG-GCAU---------------------------------------------

>Accession:X02800::SeqID:95958::TaxID:2
----------------------------------------------------------------------------------------------------------------------UG-CC-UGGCGG-CA-GU-AGC--G-C-G-GUGG-U-CCCAC-CUG-ACC--C--CAUG-CCGAA-CUCAGA-A----GUGAAA-CGCCGU-AGCG-CCG-AUG-GU-AGU-GUGGGG------UCU---CC-CCA--UGCG--AGAGUAGG-GAA--CUGCCAG-GCAU---------------------------------------------

>Accession:M24295::SeqID:95959::TaxID:2
----------------------------------------------------------------------------------------------------------------------UG-UC-UGGCGG-CA-GU-AGC--G-C-G-GUGG-U-CCCAC-CUG-ACC--C--CAUG-CCGAA-CUCAGA-A----GUGAAA-CGCCGU-AGCG-CCG-AUG-GU-AGU-GUGGGG------UCU---CC-UCA--UGCG--AGAGUAGG-GAA--CUGCCAu-GCAU---------------------------------------------

>Accession:J01696::SeqID:95960::TaxID:2
----------------------------------------------------------------------------------------------------------------------UG-CC-UGGCGG-CC-GU-AGC--G-C-G-GUGG-U-CCCAC-CUG-ACC--C--CAUG-CCGAA-CUCAGA-A----GUGAAA-CGCCGU-AGCG-CCG-AUG-GU-AGU-GUGGGG------UCU---CC-CCA--UGCG--AGAGUAGG-GAA--CUGCCAG-GCAU---------------------------------------------

>Accession:U00096::SeqID:95961::TaxID:2
----------------------------------------------------------------------------------------------------------------------UG-CC-UGGCGG-CA-GU-AGC--G-C-G-GUGG-U-CCCAC-CUG-ACC--C--CAUG-CCGAA-CUCAGA-A----GUGAAA-CGCCGU-AGCG-CCG-AUG-GU-AGU-GUGGGG------UCU---CC-UCA--UGCG--AGAGUAGG-GAA--CUGCCAG-GCAU---------------------------------------------

>Accession:U00096::SeqID:95962::TaxID:2
----------------------------------------------------------------------------------------------------------------------UG-CC-UGGCGG-CC-GU-AGC--G-C-G-GUGG-U-CCCAC-CUG-ACC--C--CAUG-CCGAA-CUCAGA-A----GUGAAA-CGCCGU-AGCG-CCG-AUG-GU-AGU-GUGGGG------UCU---CC-CCA--UGCG--AGAGUAGG-GAA--CUGCCAG-GCAU---------------------------------------------

>Accession:U00096::SeqID:95963::TaxID:2
----------------------------------------------------------------------------------------------------------------------UG-UC-UGGCGG-CA-GU-AGC--G-C-G-GUGG-U-CCCAC-CUG-ACC--C--CAUG-CCGAA-CUCAGA-A----GUGAAACCGCCGU-AGCG-CCG-AUG-GU-AGU-GUGGGG------UCU---CC-CCA--UGCG--AGAGUAGG-GAA--CUGCCAG-ACAU---------------------------------------------

>Accession:U00096::SeqID:95964::TaxID:2
----------------------------------------------------------------------------------------------------------------------UG-CC-UGGCGG-CA-GU-AGC--G-C-G-GUGG-U-CCCAC-CUG-ACC--C--CAUG-CCGAA-CUCAGA-A----GUGAAA-CGCCGU-AGCG-CCG-AUG-GU-AGU-GUGGGG------UCU---CC-CCA--UGCG--AGAGUAGG-GAA--CUGCCAG-GCAU---------------------------------------------

>Accession:X00501::SeqID:95965::TaxID:2
--------------------------------------------------------------------------------------------------------------------AUUUGCC-UGGCGG-CC-GU-AGC--G-C-G-GUGG-U-CCCAC-CUG-ACC--C--CAUG-CCGAA-CUCAGA-A----GUGAAA-CGCCGU-AGCG-CCG-AUG-GU-AGU-GUGGGG------UCU---CC-CCA--UGCG--AGAGUAGG-GAA--CUGCCAG-ACAU---------------------------------------------

>Accession:M25630::SeqID:95966::TaxID:2
-------------------------------------------------------------------------------------------------------------------AAUUUGCc-UGGCGG-CA-GU-AGC--G-C-G-GUGG-U-CCCAC-CUG-ACC--C--CAUG-CCGAA-CUCAGA-A----GUGAAA-CGCCGU-AGCG-CCG-AUG-GU-AGU-GUGGGG------UCU---CC-CCA--UGCG--AGAGUAGG-GAA--CUGCCAG-GCAUCA-------------------------------------------

>Accession:AE016755::SeqID:96111::TaxID:2
----------------------------------------------------------------------------------------------------------------------UG-CC-UGGCGG-CC-UU-AGC--G-C-G-GUGG-U-CCCAC-CUG-ACC--C--CAUG-CCGAA-CUCAGA-A----GUGAAA-CGCCGU-AGCG-CCG-AUG-GU-AGU-GUGGGG------UCU---CC-CCA--UGCG--AGAGUAGG-GAA--CUGCCAG-GCAU---------------------------------------------

>Accession:AE016764::SeqID:96112::TaxID:2
----------------------------------------------------------------------------------------------------------------------UG-CC-UGGCGG-CC-UU-AGC--G-C-G-GUGG-U-CCCAC-CUG-ACC--C--CAUG-CCGAA-CUCAGA-A----GUGAAA-CGCCGU-AGCG-CCG-AUG-GU-AGU-GUGGGG------UCU---CC-CCA--UGCG--AGAGUAGG-GAA--CUGCCAG-GCAU---------------------------------------------

>Accession:AE016767::SeqID:96113::TaxID:2
--------------------------------------------------------------------------------------------------------------------------C-UGGCGG-CA-GU-AGC--G-C-G-GUGG-U-CCCAC-CUG-ACC--C--CAUG-CCGAA-CUCAGA-A----GUGAAA-CGCCGU-AGCG-CCG-AUG-GU-AGU-GUGGGG------UCU---CC-CCA--UGCG--AGAGUAGG-GAA--CUGCCAG--------------------------------------------------

>Accession:AE016769::SeqID:96114::TaxID:2
----------------------------------------------------------------------------------------------------------------------UG-CC-UGGCGG-CC-UU-AGC--G-C-G-GUGG-U-CCCAC-CUG-ACC--C--CAUG-CCGAA-CUCAGA-A----GUGAAA-CGCCGU-AGCG-CCG-AUG-GU-AGU-GUGGGG------GCU---CC-CCA--UGCG--AGAGUAGG-GAA--CUGCCAG-GCAU---------------------------------------------

>Accession:AE016770::SeqID:96115::TaxID:2
----------------------------------------------------------------------------------------------------------------------UG-CC-UGGCGG-CC-UU-AGC--G-C-G-GUGG-U-CCCAC-CUG-ACC--C--CAUG-CCGAA-CUCAGA-A----GUGAAA-CGCCGU-AGCG-CCG-AUG-GU-AGU-GUGGGG------UCU---CC-CCA--UGCG--AGAGUAGG-GAA--CUGCCAG-GCAU---------------------------------------------

>Accession:AE016770::SeqID:96116::TaxID:2
----------------------------------------------------------------------------------------------------------------------UG-CC-UGGCGG-CC-UU-AGC--G-C-G-GUGG-U-CCCAC-CUG-ACC--C--CAUG-CCGAA-CUCAGA-A----GUGAAA-CGCCGU-AGCG-CCG-AUG-GU-AGU-GUGGGG------UCU---CC-CCA--UGCG--AGAGUAGG-GAA--CUGCCAG-GCAU---------------------------------------------

>Accession:AE016770::SeqID:96117::TaxID:2
----------------------------------------------------------------------------------------------------------------------UG-CC-UGGCGG-CC-UU-AGC--G-C-G-GUGG-U-CCCAC-CUG-ACC--C--CAUG-CCGAA-CUCAGA-A----GUGAAA-CGCCGU-AGCG-CCG-AUG-GU-AGU-GUGGGG------UCU---CC-CCA--UGCG--AGAGUAGG-GAA--CUGCCAG-GCAU---------------------------------------------

>Accession:AE014075::SeqID:96118::TaxID:2
--------------------------------------------------------------------------------------------------------------------------C-UGGCGG-CA-GU-AGC--G-C-G-GUGG-U-CCCAC-CUG-ACC--C--CAUG-CCGAA-CUCAGA-A----GUGAAA-CGCCGU-AGCG-CCG-AUG-GU-AGU-GUGGGG------UCU---CC-CCA--UGCG--AGAGUAGG-GAA--CUGCCAG--------------------------------------------------

>Accession:AE014075::SeqID:96119::TaxID:2
----------------------------------------------------------------------------------------------------------------------UG-CC-UGGCGG-CC-UU-AGC--G-C-G-GUGG-U-CCCAC-CUG-ACC--C--CAUG-CCGAA-CUCAGA-A----GUGAAA-CGCCGU-AGCG-CCG-AUG-GU-AGU-GUGGGG------UCU---CC-CCA--UGCG--AGAGUAGG-GAA--CUGCCAG-GCAU---------------------------------------------

>Accession:AE014075::SeqID:96120::TaxID:2
----------------------------------------------------------------------------------------------------------------------UG-CC-UGGCGG-CC-UU-AGC--G-C-G-GUGG-U-CCCAC-CUG-ACC--C--CAUG-CCGAA-CUCAGA-A----GUGAAA-CGCCGU-AGCG-CCG-AUG-GU-AGU-GUGGGG------UCU---CC-CCA--UGCG--AGAGUAGG-GAA--CUGCCAG-GCAU---------------------------------------------

>Accession:AE014075::SeqID:96121::TaxID:2
----------------------------------------------------------------------------------------------------------------------UG-CC-UGGCGG-CC-UU-AGC--G-C-G-GUGG-U-CCCAC-CUG-ACC--C--CAUG-CCGAA-CUCAGA-A----GUGAAA-CGCCGU-AGCG-CCG-AUG-GU-AGU-GUGGGG------GCU---CC-CCA--UGCG--AGAGUAGG-GAA--CUGCCAG-GCAU---------------------------------------------

>Accession:AE014075::SeqID:96122::TaxID:2
----------------------------------------------------------------------------------------------------------------------UG-CC-UGGCGG-CC-UU-AGC--G-C-G-GUGG-U-CCCAC-CUG-ACC--C--CAUG-CCGAA-CUCAGA-A----GUGAAA-CGCCGU-AGCG-CCG-AUG-GU-AGU-GUGGGG------UCU---CC-CCA--UGCG--AGAGUAGG-GAA--CUGCCAG-GCAU---------------------------------------------

>Accession:AE014075::SeqID:96123::TaxID:2
----------------------------------------------------------------------------------------------------------------------UG-CC-UGGCGG-CC-UU-AGC--G-C-G-GUGG-U-CCCAC-CUG-ACC--C--CAUG-CCGAA-CUCAGA-A----GUGAAA-CGCCGU-AGCG-CCG-AUG-GU-AGU-GUGGGG------UCU---CC-CCA--UGCG--AGAGUAGG-GAA--CUGCCAG-GCAU---------------------------------------------

>Accession:AE014075::SeqID:96124::TaxID:2
----------------------------------------------------------------------------------------------------------------------UG-CC-UGGCGG-CC-UU-AGC--G-C-G-GUGG-U-CCCAC-CUG-ACC--C--CAUG-CCGAA-CUCAGA-A----GUGAAA-CGCCGU-AGCG-CCG-AUG-GU-AGU-GUGGGG------UCU---CC-CCA--UGCG--AGAGUAGG-GAA--CUGCCAG-GCAU---------------------------------------------

>Accession:U00096::SeqID:96140::TaxID:2
----------------------------------------------------------------------------------------------------------------------UG-CC-UGGCGG-CC-GU-AGC--G-C-G-GUGG-U-CCCAC-CUG-ACC--C--CAUG-CCGAA-CUCAGA-A----GUGAAA-CGCCGU-AGCG-CCG-AUG-GU-AGU-GUGGGG------UCU---CC-CCA--UGCG--AGAGUAGG-GAA--CUGCCAG-GCAU---------------------------------------------

>Accession:U00096::SeqID:96141::TaxID:2
----------------------------------------------------------------------------------------------------------------------UG-CC-UGGCGG-CC-GU-AGC--G-C-G-GUGG-U-CCCAC-CUG-ACC--C--CAUG-CCGAA-CUCAGA-A----GUGAAA-CGCCGU-AGCG-CCG-AUG-GU-AGU-GUGGGG------UCU---CC-CCA--UGCG--AGAGUAGG-GAA--CUGCCAG-GCAU---------------------------------------------

>Accession:U00096::SeqID:96142::TaxID:2
----------------------------------------------------------------------------------------------------------------------UG-UC-UGGCGG-CA-GU-AGC--G-C-G-GUGG-U-CCCAC-CUG-ACC--C--CAUG-CCGAA-CUCAGA-A----GUGAAA-CGCCGU-AGCG-CCG-AUG-GU-AGU-GUGGGG------UCU---CC-CCA--UGCG--AGAGUAGG-GAA--CUGCCAG-ACAU---------------------------------------------

>Accession:U00096::SeqID:96143::TaxID:2
----------------------------------------------------------------------------------------------------------------------UG-CC-UGGCGG-CC-GU-AGC--G-C-G-GUGG-U-CCCAC-CUG-ACC--C--CAUG-CCGAA-CUCAGA-A----GUGAAA-CGCCGU-AGCG-CCG-AUG-GU-AGU-GUGGGG------UCU---CC-CCA--UGCG--AGAGUAGG-GAA--CUGCCAG-GCAU---------------------------------------------

>Accession:U00096::SeqID:96144::TaxID:2
----------------------------------------------------------------------------------------------------------------------UG-CC-UGGCGG-CC-GU-AGC--G-C-G-GUGG-U-CCCAC-CUG-ACC--C--CAUG-CCGAA-CUCAGA-A----GUGAAA-CGCCGU-AGCG-CCG-AUG-GU-AGU-GUGGGG------UCU---CC-CCA--UGCG--AGAGUAGG-GAA--CUGCCAG-GCAU---------------------------------------------

>Accession:U00096::SeqID:96145::TaxID:2
----------------------------------------------------------------------------------------------------------------------UG-CC-UGGCGG-CA-GU-AGC--G-C-G-GUGG-U-CCCAC-CUG-ACC--C--CAUG-CCGAA-CUCAGA-A----GUGAAA-CGCCGU-AGCG-CCG-AUG-GU-AGU-GUGGGG------UCU---CC-UCA--UGCG--AGAGUAGG-GAA--CUGCCAG-GCAU---------------------------------------------

>Accession:U00096::SeqID:96146::TaxID:2
----------------------------------------------------------------------------------------------------------------------UG-CC-UGGCGG-CA-GU-AGC--G-C-G-GUGG-U-CCCAC-CUG-ACC--C--CAUG-CCGAA-CUCAGA-A----GUGAAA-CGCCGU-AGCG-CCG-AUG-GU-AGU-GUGGGG------UCU---CC-CCA--UGCG--AGAGUAGG-GAA--CUGCCAG-GCAU---------------------------------------------

>Accession:U00096::SeqID:96147::TaxID:2
----------------------------------------------------------------------------------------------------------------------UG-CC-UGGCGG-CA-GU-AGC--G-C-G-GUGG-U-CCCAC-CUG-ACC--C--CAUG-CCGAA-CUCAGA-A----GUGAAA-CGCCGU-AGCG-CCG-AUG-GU-AGU-GUGGGG------UCU---CC-CCA--UGCG--AGAGUAGG-GAA--CUGCCAG-GCAU---------------------------------------------

>Accession:AB035920::SeqID:96169::TaxID:2
----------------------------------------------------------------------------------------------------------------------UG-CC-UGGCGG-CC-UU-AGC--G-C-G-GUGG-U-CCCAC-CUG-ACC--C--CAUG-CCGAA-CUCAGA-A----GUGAAA-CGCCGU-AGCG-CCG-AUG-GU-AGU-GUGGGG------UCU---CC-CCA--UGCG--AGAGUAGG-GAA--CUGCCAG-GCAU---------------------------------------------

>Accession:AB035921::SeqID:96170::TaxID:2
----------------------------------------------------------------------------------------------------------------------UG-CC-UGGCGG-CC-UU-AGC--G-C-G-GUGG-U-CCCAC-CUG-ACC--C--CAUG-CCGAA-CUCAGA-A----GUGAAA-CGCCGU-AGCG-CCG-AUG-GU-AGU-GUGGGG------UCU---CC-CCA--UGCG--AGAGUAGG-GAA--CUGCCAG-GCAU---------------------------------------------

>Accession:AB035922::SeqID:96171::TaxID:2
----------------------------------------------------------------------------------------------------------------------UG-CC-UGGCGG-CC-UU-AGC--G-C-G-GUGG-U-CCCAC-CUG-ACC--C--CAUG-CCGAA-CUCAGA-A----GUGAAA-CGCCGU-AGCG-CCG-AUG-GU-AGU-GUGGGG------UCU---CC-CCA--UGCG--AGAGUAGG-GAA--CUGCCAG-GCAU---------------------------------------------

>Accession:AB035923::SeqID:96172::TaxID:2
----------------------------------------------------------------------------------------------------------------------UG-CC-UGGCGG-CC-UU-AGC--G-C-G-GUGG-U-CCCAC-CUG-ACC--C--CAUG-CCGAA-CUCAGA-A----GUGAAA-CGCCGU-AGCG-CCG-AUG-GU-AGU-GUGGGG------UCU---CC-CCA--UGCG--AGAGUAGG-GAA--CUGCCAG-GCAU---------------------------------------------

>Accession:AB035923::SeqID:96173::TaxID:2
----------------------------------------------------------------------------------------------------------------------UG-UC-UGGCGG-CA-GU-AGC--G-C-G-GUGG-U-CCCAC-CUG-ACC--C--CAUG-CCGAA-CUCAGA-A----GUGAAA-CGCCGU-AGCG-CCG-AUG-GU-AGU-GUGGGG------ACU---CC-CCA--UGCG--AGAGUAGG-GAA--CUGCCAG-ACAU---------------------------------------------

>Accession:AB035924::SeqID:96174::TaxID:2
----------------------------------------------------------------------------------------------------------------------UG-CC-UGGCGG-CC-UU-AGC--G-C-G-GUGG-U-CCCAC-CUG-ACC--C--CAUG-CCGAA-CUCAGA-A----GUGAAA-CGCCGU-AGCG-CCG-AUG-GU-AGU-GUGGGG------UCU---CC-CCA--UGCG--AGAGUAGG-GAA--CUGCCAG-GCAU---------------------------------------------

>Accession:AB035925::SeqID:96175::TaxID:2
----------------------------------------------------------------------------------------------------------------------UG-CC-UGGCGG-CC-UU-AGC--G-C-G-GUGG-U-CCCAC-CUG-ACC--C--CAUG-CCGAA-CUCAGA-A----GUGAAA-CGCCGU-AGCG-CCG-AUG-GU-AGU-GUGGGG------UCU---CC-CCA--UGCG--AGAGUAGG-GAA--CUGCCAG-GCAU---------------------------------------------

>Accession:AB035926::SeqID:96176::TaxID:2
----------------------------------------------------------------------------------------------------------------------UG-CC-UGGCGG-CC-UU-AGC--G-C-G-GUGG-U-CCCAC-CUG-ACC--C--CAUG-CCGAA-CUCAGA-A----GUGAAA-CGCCGU-AGCG-CCG-AUG-GU-AGU-GUGGGG------UCU---CC-CCA--UGCG--AGAGUAGG-GAA--CUGCCAG-GCAU---------------------------------------------

>Accession:AP002550::SeqID:96177::TaxID:2
----------------------------------------------------------------------------------------------------------------------UG-CC-UGGCGG-CC-UU-AGC--G-C-G-GUGG-U-CCCAC-CUG-ACC--C--CAUG-CCGAA-CUCAGA-A----GUGAAA-CGCCGU-AGCG-CCG-AUG-GU-AGU-GUGGGG------UCU---CC-CCA--UGCG--AGAGUAGG-GAA--CUGCCAG-GCAU---------------------------------------------

>Accession:AP002562::SeqID:96178::TaxID:2
----------------------------------------------------------------------------------------------------------------------UG-CC-UGGCGG-CC-UU-AGC--G-C-G-GUGG-U-CCCAC-CUG-ACC--C--CAUG-CCGAA-CUCAGA-A----GUGAAA-CGCCGU-AGCG-CCG-AUG-GU-AGU-GUGGGG------UCU---CC-CCA--UGCG--AGAGUAGG-GAA--CUGCCAG-GCAU---------------------------------------------

>Accession:AP002564::SeqID:96179::TaxID:2
----------------------------------------------------------------------------------------------------------------------UG-UC-UGGCGG-CA-GU-AGC--G-C-G-GUGG-U-CCCAC-CUG-ACC--C--CAUG-CCGAA-CUCAGA-A----GUGAAA-CGCCGU-AGCG-CCG-AUG-GU-AGU-GUGGGG------ACU---CC-CCA--UGCG--AGAGUAGG-GAA--CUGCCAG-ACAU---------------------------------------------

>Accession:AP002564::SeqID:96180::TaxID:2
----------------------------------------------------------------------------------------------------------------------UG-CC-UGGCGG-CC-UU-AGC--G-C-G-GUGG-U-CCCAC-CUG-ACC--C--CAUG-CCGAA-CUCAGA-A----GUGAAA-CGCCGU-AGCG-CCG-AUG-GU-AGU-GUGGGG------UCU---CC-CCA--UGCG--AGAGUAGG-GAA--CUGCCAG-GCAU---------------------------------------------

>Accession:AP002566::SeqID:96181::TaxID:2
----------------------------------------------------------------------------------------------------------------------UG-CC-UGGCGG-CC-UU-AGC--G-C-G-GUGG-U-CCCAC-CUG-ACC--C--CAUG-CCGAA-CUCAGA-A----GUGAAA-CGCCGU-AGCG-CCG-AUG-GU-AGU-GUGGGG------UCU---CC-CCA--UGCG--AGAGUAGG-GAA--CUGCCAG-GCAU---------------------------------------------

>Accession:AP002567::SeqID:96182::TaxID:2
----------------------------------------------------------------------------------------------------------------------UG-CC-UGGCGG-CC-UU-AGC--G-C-G-GUGG-U-CCCAC-CUG-ACC--C--CAUG-CCGAA-CUCAGA-A----GUGAAA-CGCCGU-AGCG-CCG-AUG-GU-AGU-GUGGGG------UCU---CC-CCA--UGCG--AGAGUAGG-GAA--CUGCCAG-GCAU---------------------------------------------

>Accession:AP002567::SeqID:96183::TaxID:2
----------------------------------------------------------------------------------------------------------------------UG-CC-UGGCGG-CC-UU-AGC--G-C-G-GUGG-U-CCCAC-CUG-ACC--C--CAUG-CCGAA-CUCAGA-A----GUGAAA-CGCCGU-AGCG-CCG-AUG-GU-AGU-GUGGGG------UCU---CC-CCA--UGCG--AGAGUAGG-GAA--CUGCCAG-GCAU---------------------------------------------

>Accession:AP002567::SeqID:96184::TaxID:2
----------------------------------------------------------------------------------------------------------------------UG-CC-UGGCGG-CC-UU-AGC--G-C-G-GUGG-U-CCCAC-CUG-ACC--C--CAUG-CCGAA-CUCAGA-A----GUGAAA-CGCCGU-AGCG-CCG-AUG-GU-AGU-GUGGGG------UCU---CC-CCA--UGCG--AGAGUAGG-GAA--CUGCCAG-GCAU---------------------------------------------

>Accession:BA000007::SeqID:96185::TaxID:2
----------------------------------------------------------------------------------------------------------------------UG-CC-UGGCGG-CC-UU-AGC--G-C-G-GUGG-U-CCCAC-CUG-ACC--C--CAUG-CCGAA-CUCAGA-A----GUGAAA-CGCCGU-AGCG-CCG-AUG-GU-AGU-GUGGGG------UCU---CC-CCA--UGCG--AGAGUAGG-GAA--CUGCCAG-GCAU---------------------------------------------

>Accession:BA000007::SeqID:96186::TaxID:2
----------------------------------------------------------------------------------------------------------------------UG-CC-UGGCGG-CC-UU-AGC--G-C-G-GUGG-U-CCCAC-CUG-ACC--C--CAUG-CCGAA-CUCAGA-A----GUGAAA-CGCCGU-AGCG-CCG-AUG-GU-AGU-GUGGGG------UCU---CC-CCA--UGCG--AGAGUAGG-GAA--CUGCCAG-GCAU---------------------------------------------

>Accession:BA000007::SeqID:96187::TaxID:2
----------------------------------------------------------------------------------------------------------------------UG-UC-UGGCGG-CA-GU-AGC--G-C-G-GUGG-U-CCCAC-CUG-ACC--C--CAUG-CCGAA-CUCAGA-A----GUGAAA-CGCCGU-AGCG-CCG-AUG-GU-AGU-GUGGGG------ACU---CC-CCA--UGCG--AGAGUAGG-GAA--CUGCCAG-ACAU---------------------------------------------

>Accession:BA000007::SeqID:96188::TaxID:2
----------------------------------------------------------------------------------------------------------------------UG-CC-UGGCGG-CC-UU-AGC--G-C-G-GUGG-U-CCCAC-CUG-ACC--C--CAUG-CCGAA-CUCAGA-A----GUGAAA-CGCCGU-AGCG-CCG-AUG-GU-AGU-GUGGGG------UCU---CC-CCA--UGCG--AGAGUAGG-GAA--CUGCCAG-GCAU---------------------------------------------

>Accession:BA000007::SeqID:96189::TaxID:2
----------------------------------------------------------------------------------------------------------------------UG-CC-UGGCGG-CC-UU-AGC--G-C-G-GUGG-U-CCCAC-CUG-ACC--C--CAUG-CCGAA-CUCAGA-A----GUGAAA-CGCCGU-AGCG-CCG-AUG-GU-AGU-GUGGGG------UCU---CC-CCA--UGCG--AGAGUAGG-GAA--CUGCCAG-GCAU---------------------------------------------

>Accession:BA000007::SeqID:96190::TaxID:2
----------------------------------------------------------------------------------------------------------------------UG-CC-UGGCGG-CC-UU-AGC--G-C-G-GUGG-U-CCCAC-CUG-ACC--C--CAUG-CCGAA-CUCAGA-A----GUGAAA-CGCCGU-AGCG-CCG-AUG-GU-AGU-GUGGGG------UCU---CC-CCA--UGCG--AGAGUAGG-GAA--CUGCCAG-GCAU---------------------------------------------

>Accession:BA000007::SeqID:96191::TaxID:2
----------------------------------------------------------------------------------------------------------------------UG-CC-UGGCGG-CC-UU-AGC--G-C-G-GUGG-U-CCCAC-CUG-ACC--C--CAUG-CCGAA-CUCAGA-A----GUGAAA-CGCCGU-AGCG-CCG-AUG-GU-AGU-GUGGGG------UCU---CC-CCA--UGCG--AGAGUAGG-GAA--CUGCCAG-GCAU---------------------------------------------

>Accession:BA000007::SeqID:96192::TaxID:2
----------------------------------------------------------------------------------------------------------------------UG-CC-UGGCGG-CC-UU-AGC--G-C-G-GUGG-U-CCCAC-CUG-ACC--C--CAUG-CCGAA-CUCAGA-A----GUGAAA-CGCCGU-AGCG-CCG-AUG-GU-AGU-GUGGGG------UCU---CC-CCA--UGCG--AGAGUAGG-GAA--CUGCCAG-GCAU---------------------------------------------

>Accession:AE005174::SeqID:96241::TaxID:2
----------------------------------------------------------------------------------------------------------------------UG-UC-UGGCGG-CA-GU-AGC--G-C-G-GUGG-U-CCCAC-CUG-ACC--C--CAUG-CCGAA-CUCAGA-A----GUGAAA-CGCCGU-AGCG-CCG-AUG-GU-AGU-GUGGGG------ACU---CC-CCA--UGCG--AGAGUAGG-GAA--CUGCCAG-ACAU---------------------------------------------

>Accession:AE005174::SeqID:96242::TaxID:2
----------------------------------------------------------------------------------------------------------------------UG-CC-UGGCGG-CC-UU-AGC--G-C-G-GUGG-U-CCCAC-CUG-ACC--C--CAUG-CCGAA-CUCAGA-A----GUGAAA-CGCCGU-AGCG-CCG-AUG-GU-AGU-GUGGGG------UCU---CC-CCA--UGCG--AGAGUAGG-GAA--CUGCCAG-GCAU---------------------------------------------

>Accession:AE005174::SeqID:96243::TaxID:2
----------------------------------------------------------------------------------------------------------------------UG-CC-UGGCGG-CC-UU-AGC--G-C-G-GUGG-U-CCCAC-CUG-ACC--C--CAUG-CCGAA-CUCAGA-A----GUGAAA-CGCCGU-AGCG-CCG-AUG-GU-AGU-GUGGGG------UCU---CC-CCA--UGCG--AGAGUAGG-GAA--CUGCCAG-GCAU---------------------------------------------

>Accession:AE005174::SeqID:96244::TaxID:2
----------------------------------------------------------------------------------------------------------------------UG-CC-UGGCGG-CC-UU-AGC--G-C-G-GUGG-U-CCCAC-CUG-ACC--C--CAUG-CCGAA-CUCAGA-A----GUGAAA-CGCCGU-AGCG-CCG-AUG-GU-AGU-GUGGGG------UCU---CC-CCA--UGCG--AGAGUAGG-GAA--CUGCCAG-GCAU---------------------------------------------

>Accession:AE005174::SeqID:96245::TaxID:2
----------------------------------------------------------------------------------------------------------------------UG-CC-UGGCGG-CC-UU-ARC--G-C-G-GUGG-U-CCCAC-CUG-ACC--C--CAUG-CCGAA-CUCAGA-A----GUGAAA-CGCCGU-AGCG-CCG-AUG-GU-AGU-GUGGGG------UCU---CC-CCA--UGCG--AGAGUAGG-GAA--CUGCCAG-GCAU---------------------------------------------

>Accession:AE005174::SeqID:96246::TaxID:2
----------------------------------------------------------------------------------------------------------------------UG-CC-UGGCGG-CC-UU-AGC--G-C-G-GUGG-U-CCCAC-CUG-ACC--C--CAUG-CCGAA-CUCAGA-A----GUGAAA-CGCCGU-AGCG-CCG-AUG-GU-AGU-GUGGGG------UCU---CC-CCA--UGCG--AGAGUAGG-GAA--CUGCCAG-GCAU---------------------------------------------

>Accession:AE005174::SeqID:96247::TaxID:2
----------------------------------------------------------------------------------------------------------------------UG-CC-UGGCGG-CC-UU-AGC--G-C-G-GUGG-U-CCCAC-CUG-ACC--C--CAUG-CCGAA-CUCAGA-A----GUGAAA-CGCCGU-AGCG-CCG-AUG-GU-AGU-GUGGGG------UCU---CC-CCA--UGCG--AGAGUAGG-GAA--CUGCCAG-GCAU---------------------------------------------

>Accession:AE005174::SeqID:96248::TaxID:2
----------------------------------------------------------------------------------------------------------------------UG-CC-UGGCGG-CC-UU-AGC--G-C-G-GUGG-U-CCCAC-CUG-ACC--C--CAUG-CCGAA-CUCAGA-A----GUGAAA-CGCCGU-AGCG-CCG-AUG-GU-AGU-GUGGGG------UCU---CC-CCA--UGCG--AGAGUAGG-GAA--CUGCCAG-GCAU---------------------------------------------

>Accession:AP009048::SeqID:96263::TaxID:2
----------------------------------------------------------------------------------------------------------------------UG-CC-UGGCGG-CC-GU-AGC--G-C-G-GUGG-U-CCCAC-CUG-ACC--C--CAUG-CCGAA-CUCAGA-A----GUGAAA-CGCCGU-AGCG-CCG-AUG-GU-AGU-GUGGGG------UCU---CC-CCA--UGCG--AGAGUAGG-GAA--CUGCCAG-GCAU---------------------------------------------

>Accession:AP009048::SeqID:96264::TaxID:2
----------------------------------------------------------------------------------------------------------------------UG-CC-UGGCGG-CC-GU-AGC--G-C-G-GUGG-U-CCCAC-CUG-ACC--C--CAUG-CCGAA-CUCAGA-A----GUGAAA-CGCCGU-AGCG-CCG-AUG-GU-AGU-GUGGGG------UCU---CC-CCA--UGCG--AGAGUAGG-GAA--CUGCCAG-GCAU---------------------------------------------

>Accession:AP009048::SeqID:96265::TaxID:2
----------------------------------------------------------------------------------------------------------------------UG-UC-UGGCGG-CA-GU-AGC--G-C-G-GUGG-U-CCCAC-CUG-ACC--C--CAUG-CCGAA-CUCAGA-A----GUGAAA-CGCCGU-AGCG-CCG-AUG-GU-AGU-GUGGGG------UCU---CC-CCA--UGCG--AGAGUAGG-GAA--CUGCCAG-ACAU---------------------------------------------

>Accession:AP009048::SeqID:96266::TaxID:2
----------------------------------------------------------------------------------------------------------------------UG-CC-UGGCGG-CC-GU-AGC--G-C-G-GUGG-U-CCCAC-CUG-ACC--C--CAUG-CCGAA-CUCAGA-A----GUGAAA-CGCCGU-AGCG-CCG-AUG-GU-AGU-GUGGGG------UCU---CC-CCA--UGCG--AGAGUAGG-GAA--CUGCCAG-GCAU---------------------------------------------

>Accession:AP009048::SeqID:96267::TaxID:2
----------------------------------------------------------------------------------------------------------------------UG-CC-UGGCGG-CA-GU-AGC--G-C-G-GUGG-U-CCCAC-CUG-ACC--C--CAUG-CCGAA-CUCAGA-A----GUGAAA-CGCCGU-AGCG-CCG-AUG-GU-AGU-GUGGGG------UCU---CC-CCA--UGCG--AGAGUAGG-GAA--CUGCCAG-GCAU---------------------------------------------

>Accession:AP009048::SeqID:96268::TaxID:2
----------------------------------------------------------------------------------------------------------------------UG-CC-UGGCGG-CA-GU-AGC--G-C-G-GUGG-U-CCCAC-CUG-ACC--C--CAUG-CCGAA-CUCAGA-A----GUGAAA-CGCCGU-AGCG-CCG-AUG-GU-AGU-GUGGGG------UCU---CC-UCA--UGCG--AGAGUAGG-GAA--CUGCCAG-GCAU---------------------------------------------

>Accession:AP009048::SeqID:96269::TaxID:2
----------------------------------------------------------------------------------------------------------------------UG-CC-UGGCGG-CC-GU-AGC--G-C-G-GUGG-U-CCCAC-CUG-ACC--C--CAUG-CCGAA-CUCAGA-A----GUGAAA-CGCCGU-AGCG-CCG-AUG-GU-AGU-GUGGGG------UCU---CC-CCA--UGCG--AGAGUAGG-GAA--CUGCCAG-GCAU---------------------------------------------

>Accession:AP009048::SeqID:96270::TaxID:2
----------------------------------------------------------------------------------------------------------------------UG-CC-UGGCGG-CA-GU-AGC--G-C-G-GUGG-U-CCCAC-CUG-ACC--C--CAUG-CCGAA-CUCAGA-A----GUGAAA-CGCCGU-AGCG-CCG-AUG-GU-AGU-GUGGGG------UCU---CC-CCA--UGCG--AGAGUAGG-GAA--CUGCCAG-GCAU---------------------------------------------

>Accession:AB109769::SeqID:102960::TaxID:2
-------------------------------------------------------------------------------------------------------------------------UA-UGGUGA-UA-AA-AGC--A-A-G-AGGG-A-UACAC-CUG-UAC--C--CAUG-CCGAA-CACAGA-A----GUUAAG-CCUCUU-AACG-CCG-AUG-GU-ACU-ACGAUG------GAAA--CG-UCG--UGGG--AGAGUAGG-UAG--UCGCCAA-AC-----------------------------------------------

>Accession:AB109770::SeqID:102961::TaxID:2
--------------------------------------------------------------------------------------------------------------------------A-UGGUGA-UA-AA-AGC--A-A-G-AGGG-A-UACAC-CUG-UAC--C--CAUG-CCGAA-CACAGA-A----GUUAAG-CCUCUU-AACG-CCG-AUG-GU-ACU-ACGAUG------GAAA--CG-UCG--UGGG--AGAGUAGG-UAG--UCGCCAA-ACA----------------------------------------------

>Accession:AB109771::SeqID:102962::TaxID:2
-------------------------------------------------------------------------------------------------------------------------UA-UGGUGA-UA-AA-AGC--A-A-G-AGGG-A-UACAC-CUG-UAC--C--CAUG-CCGAA-CACAGA-A----GUUAAG-CCUCUU-AACG-CCG-AUG-GU-ACU-ACGAUG------GAAA--CG-UCG--UGGG--AGAGUAGG-UAG--UCGCCAA-AC-----------------------------------------------

>Accession:AB109772::SeqID:102963::TaxID:2
-------------------------------------------------------------------------------------------------------------------------UA-UGGUGA-UA-AA-AGC--A-A-G-AGGG-A-UACAC-CUG-UAC--C--CAUG-CCGAA-CACAGA-A----GUUAAG-CCUCUU-AACG-CCG-AUG-GU-ACU-ACGAUG------GAAA--CG-UCG--UGGG--AGAGUAGG-UAG--UCGCCAA-AC-----------------------------------------------

>Accession:M33886::SeqID:103327::TaxID:2
-------------------------------------------------------------------------------------------------------------------------UC-UGGUGG-CG-AU-AGC--A-G-A-GAGG-U-CACAC-CCG-UUC--C--CAUG-CCGAA-CACGGA-A----GUUAAG-UUCUCU-AGCG-CCG-AUG-GU-AGU-GUGGAC------UUU---GU-CCC--UGUG--AGAGUAGG-ACG--UUGCCAG-GC-----------------------------------------------

>Accession:M33889::SeqID:103634::TaxID:2
-------------------------------------------------------------------------------------------------------------------------UC-UGGUGA-CG-AU-GGC--G-G-A-GGGG-A-CACAC-CCG-UUC--C--CAUA-CCGAA-CACGGC-C----GUUAAG-CCCUCC-AGCG-CCG-AUG-GU-ACU-UGCCCC------GCAG--GG-AGC--CGGG--AGAGUAGG-ACG--UUGCCAG-GU-----------------------------------------------

>Accession:AY883058::SeqID:103752::TaxID:2
-----------------------------------------------------------------------------------------------------------------------U-CC-UGGCGA-CC-AU-AGC--G-G-U-UUGG-A-ACCAC-CUG-AUU--C--CAUC-UCGAA-CUCAGA-A----GUGAA------------------------------------------------------------------------------------------------------------------------------------

>Accession:AY883059::SeqID:103753::TaxID:2
-----------------------------------------------------------------------------------------------------------------------U-CC-UGGCGA-CC-AU-AGC--G-G-U-UUGG-A-ACCAC-CUG-AUU--C--CAUC-UCGAA-CUCAGA-A----GUGAA------------------------------------------------------------------------------------------------------------------------------------

>Accession:Z24686::SeqID:103761::TaxID:2
-----------------------------------------------------------------------------------------------------------------------U-CC-UGGCGA-CC-AU-AGC--G-G-U-UUGG-A-ACCAC-CUG-ACU--C--CAUC-UCGAA-CUCAGA-A----GUGAAA-CGAACA-UGCG-CCA-AUG-AU-AGU-GUGAGG------CUU---CC-UC--------------------------------------------------------------------------------

>Accession:AY883063::SeqID:103767::TaxID:2
-----------------------------------------------------------------------------------------------------------------------U-CC-UGGCGA-CC-AU-AGC--G-G-U-UUGG-A-ACCAC-CUG-AUU--C--CAUC-UCGAA-CUCAGA-A----GUGAA------------------------------------------------------------------------------------------------------------------------------------

>Accession:AJ749949::SeqID:104384::TaxID:2
-------------------------------------------------------------------------------------------------------------------------AU-UGAUGA-UG-AU-AGC--A-G-U-CUGG-A-ACCAC-CUG-AUC--C--CAUU-CCGAA-CUCAGA-A----GUGAAA-CGGUCU-CACG-CCA-AUG-AU-AGU-CUGGC-------ACU----GCCCA--GGUG--AAAGUAGG-UAA--UCGUCAA-AC-----------------------------------------------

>Accession:AJ749949::SeqID:104385::TaxID:2
-------------------------------------------------------------------------------------------------------------------------UU-UGGCGA-UG-AU-AGC--U-U-G-UAGG-A-ACCAC-CUG-AUC--C--CAUU-CCGAA-CUCAGA-A----GUGAAA-CUACAA-AACG-CCG-AUG-AU-AGU-CUGGC-------AUU----GCCCA--GGUG--AAAGUAGG-UAG--UCGCCAU-CU-----------------------------------------------

>Accession:AJ749949::SeqID:104386::TaxID:2
-------------------------------------------------------------------------------------------------------------------------UU-UGGCGA-UG-AU-AGC--U-U-G-UAGG-A-ACCAC-CUG-AUC--C--CAUU-CCGAA-CUCAGA-A----GUGAAA-CUACAA-AACG-CCG-AUG-AU-AGU-CUGGC-------AUU----GCCCA--GGUG--AAAGUAGG-UAG--UCGCCAU-CU-----------------------------------------------

>Accession:AJ749949::SeqID:104387::TaxID:2
-------------------------------------------------------------------------------------------------------------------------UU-UGGCGA-UG-AU-AGC--U-U-G-UAGG-A-ACCAC-CUG-AUC--C--CAUU-CCGAA-CUCAGA-A----GUGAAA-CUACAA-AACG-CCG-AUG-AU-AGU-CUGGC-------AUU----GCCCA--GGUG--AAAGUAGG-UAG--UCGCCAU-CU-----------------------------------------------

>Accession:M55343::SeqID:104418::TaxID:2
-----------------------------------------------------------------------------------------------------------------------G-UUUCGGUGG-UU-UU-GGC--G-A-A-GGGG-A-AACGC-CCG-GUC--U--CAUU-CCGAA-CCCGGA-A----GCUAAG-CUCUUC-AGCG-CCG-AUG-GU-ACU-GCAUGG------GGGA--CU-GUG--UGGG--AGAGUAGG-ACG--CCGCCGG-ACU----------------------------------------------

>Accession:CP000249::SeqID:104498::TaxID:2
-------------------------------------------------------------------------------------------------------------------------UU-CGGUGG-UU-UU-GGC--G-A-A-GGGG-A-AACGC-CCG-GUC--U--CAUU-CCGAA-CCCGGA-A----GCUAAG-CUCUUC-AGCG-CCG-AUG-GU-ACU-GCAUGG------GGGA--CU-GUG--UGGG--AGAGUAGG-ACG--CCGCCGG-AC-----------------------------------------------

>Accession:CP000249::SeqID:104499::TaxID:2
-------------------------------------------------------------------------------------------------------------------------UU-CGGUGG-UU-UU-GGC--G-A-A-GGGG-A-AACGC-CCG-GUC--U--CAUU-CCGAA-CCCGGA-A----GCUAAG-CUCUUC-AGCG-CCG-AUG-GU-ACU-GCAUGG------GGGA--CU-GUG--UGGG--AGAGUAGG-ACG--CCGCCGG-AC-----------------------------------------------

>Accession:AE010497::SeqID:106654::TaxID:2
--------------------------------------------------------------------------------------------------------------------------U-UGGUGA-GU-AU-AGC--U-A-U-GGGG-G-UACAC-CUA-GUU--A--CAUU-CCGAA-CCUAGA-A----GUUAAG-CCCAUA-UACG-CUG-AUG-GU-ACU-UGGCUG------GAAG--CG-GCC--UGGG--AGAGUAUG-GAU--UUGCCAA-GC-----------------------------------------------

>Accession:AE010504::SeqID:106655::TaxID:2
--------------------------------------------------------------------------------------------------------------------------U-UGGUGA-GU-AU-AGC--U-A-U-GGGG-G-UACAC-CUA-GUU--A--CAUU-CCGAA-CCUAGA-A----GUUAAG-CCCAUA-UACG-CUG-AUG-GU-ACU-UGGCUG------GAAG--CG-GCC--AGGG--AGAGUAUG-GAU--UUGCCAA-GC-----------------------------------------------

>Accession:AE010524::SeqID:106656::TaxID:2
-------------------------------------------------------------------------------------------------------------------------CU-UGGUGA-GU-AU-AGC--U-A-U-GGGG-G-UACAC-CUA-GUU--A--CAUU-CCGAA-CCUAGA-A----GUUAAG-CCCAUA-UACG-CUG-AUG-GU-ACU-UGGCUG------GAAG--UG-GCC--UGGG--AGAGUAUG-GAU--UUGCCAA-G------------------------------------------------

>Accession:AE010555::SeqID:106657::TaxID:2
-------------------------------------------------------------------------------------------------------------------------CU-UGGUGA-GU-AU-AGC--U-A-U-GGGG-G-UACAC-CUA-GUU--A--CAUU-CCGAA-CCUAGA-A----GUUAAG-CCCAUA-UACG-CUG-AUG-GU-ACU-UGGCUG------GAAG--CG-GCC--UGGG--AGAGUAUG-GAU--UUGCCAA-G------------------------------------------------

>Accession:AE010643::SeqID:106658::TaxID:2
--------------------------------------------------------------------------------------------------------------------------U-UGGUGA-GU-AU-AGC--U-A-U-GGGG-G-UACAC-CUA-GUU--A--CAUU-CCGAA-CCUAGA-A----GUUAAG-CCCAUA-UACG-CUG-AUG-GU-ACU-UGGCUG------GAAG--CG-GCC--UGGG--AGAGUAUG-GAU--UUGCCAA-GC-----------------------------------------------

>Accession:AE009951::SeqID:106659::TaxID:2
--------------------------------------------------------------------------------------------------------------------------U-UGGUGA-GU-AU-AGC--U-A-U-GGGG-G-UACAC-CUA-GUU--A--CAUU-CCGAA-CCUAGA-A----GUUAAG-CCCAUA-UACG-CUG-AUG-GU-ACU-UGGCUG------GAAG--CG-GCC--UGGG--AGAGUAUG-GAU--UUGCCAA-GC-----------------------------------------------

>Accession:AE009951::SeqID:106660::TaxID:2
--------------------------------------------------------------------------------------------------------------------------U-UGGUGA-GU-AU-AGC--U-A-U-GGGG-G-UACAC-CUA-GUU--A--CAUU-CCGAA-CCUAGA-A----GUUAAG-CCCAUA-UACG-CUG-AUG-GU-ACU-UGGCUG------GAAG--CG-GCC--AGGG--AGAGUAUG-GAU--UUGCCAA-GC-----------------------------------------------

>Accession:AE009951::SeqID:106661::TaxID:2
-------------------------------------------------------------------------------------------------------------------------CU-UGGUGA-GU-AU-AGC--U-A-U-GGGG-G-UACAC-CUA-GUU--A--CAUU-CCGAA-CCUAGA-A----GUUAAG-CCCAUA-UACG-CUG-AUG-GU-ACU-UGGCUG------GAAG--UG-GCC--UGGG--AGAGUAUG-GAU--UUGCCAA-G------------------------------------------------

>Accession:AE009951::SeqID:106662::TaxID:2
-------------------------------------------------------------------------------------------------------------------------CU-UGGUGA-GU-AU-AGC--U-A-U-GGGG-G-UACAC-CUA-GUU--A--CAUU-CCGAA-CCUAGA-A----GUUAAG-CCCAUA-UACG-CUG-AUG-GU-ACU-UGGCUG------GAAG--CG-GCC--UGGG--AGAGUAUG-GAU--UUGCCAA-G------------------------------------------------

>Accession:AE009951::SeqID:106663::TaxID:2
--------------------------------------------------------------------------------------------------------------------------U-UGGUGA-GU-AU-AGC--U-A-U-GGGG-G-UACAC-CUA-GUU--A--CAUU-CCGAA-CCUAGA-A----GUUAAG-CCCAUA-UACG-CUG-AUG-GU-ACU-UGGCUG------GAAG--CG-GCC--UGGG--AGAGUAUG-GAU--UUGCCAA-GC-----------------------------------------------

>Accession:M35170::SeqID:108371::TaxID:2
-----------------------------------------------------------------------------------------------------------------------U-UC-CGGUGA-CC-AU-ACC--C-A-A-ACGG-A-AACAC-CCG-UUC--C--CAUU-CCGAA-CACGGC-C----GUGAAA--GUUUG--AGG-CCG-AUG-GU-AGU-GC-----G----UCCA-------G--CGCG--AGAGUAGG-U-A--UCGCCGG-CC-----------------------------------------------

>Accession:BA000043::SeqID:108583::TaxID:2
------------------------------------------------------------------------------------------------------------------------------------------GC--G-G-A-GGGG-A-AACAC-CCG-UUC--C--CAUC-CCGAA-CACGGA-A----GUUAAG-CCCUCC-AGCG-CCG-AUG-GU-AGU-UGGGGCC-----AGC---GC-CCC--UGCA--AGAGUAGG-UCG--UCGCUAG-GC-----------------------------------------------

>Accession:BA000043::SeqID:108584::TaxID:2
-------------------------------------------------------------------------------------------------------------------------CC-UAGUGG-CU-AU-GGC--G-G-A-GGGG-A-AACAC-CCG-UUC--C--CAUC-CCGAA-CACGGA-A----GUUAAG-CCCUCC-AGCG-CCG-AUG-GU-AGU-UGGGGCC-----AGC---GC-CCC--UGCA--AGAGUAGG-UCG--UUGCUAG-GC-----------------------------------------------

>Accession:BA000043::SeqID:108585::TaxID:2
-------------------------------------------------------------------------------------------------------------------------CC-UAGUGG-CU-AU-GGC--G-G-A-GGGG-A-AACAC-CCG-UUC--C--CAUC-CCGAA-CACGGA-A----GUUAAG-CCCUCC-AGCG-CCG-AUG-GU-AGU-UGGGGCC-----AGC---GC-CCC--UGCA--AGAGUAGG-UCG--UUGCUAG-GC-----------------------------------------------

>Accession:BA000043::SeqID:108586::TaxID:2
-------------------------------------------------------------------------------------------------------------------------CC-UAGUGG-CU-AU-GGC--G-G-A-GGGG-A-AACAC-CCG-UUC--C--CAUC-CCGAA-CACGGA-A----GUUAAG-CCCUCC-AGCG-CCG-AUG-GU-AGU-UGGGGCC-----AGC---GC-CCC--UGCA--AGAGUAGG-UCG--CUGCUAG-GC-----------------------------------------------

>Accession:BA000043::SeqID:108587::TaxID:2
-------------------------------------------------------------------------------------------------------------------------CC-UAGUGG-CU-AU-GGC--G-G-A-GGGG-A-AACAC-CCG-UUC--C--CAUC-CCGAA-CACGGA-A----GUUAAG-CCCUCC-AGCG-CCG-AUG-GU-AGU-UGGGGCC-----AGC---GU-CCC--UGCA--AGAGUAGG-UCG--CUGCUAG-GC-----------------------------------------------

>Accession:BA000043::SeqID:108588::TaxID:2
----------------------------------------------------------------------------------------------------------------------------UAGUGG-CU-AU-GGC--G-G-A-GGGG-A-AACAC-CCG-UUC--C--CAUC-CCGAA-CACGGA-A----GUUAAG-CCCUCC-AGCG-CCG-AUG-GU-AGU-UGGGGCC-----AGC---GC-CCC--UGCA--AGAGUAGG-UCG--CUGCUAG-GCAG---------------------------------------------

>Accession:BA000043::SeqID:108589::TaxID:2
----------------------------------------------------------------------------------------------------------------------------UAGUGG-CU-AU-GGC--G-G-A-GGGG-A-AACAC-CCG-UUC--C--CAUC-CCGAA-CACGGA-A----GUUAAG-CCCUCC-AGCG-CCG-AUG-GU-AGU-UGGGGCC-----AGC---GC-CCC--UGCA--AGAGUAGG-UCG--CUGCUAG-GCAG---------------------------------------------

>Accession:BA000043::SeqID:108590::TaxID:2
------------------------------------------------------------------------------------------------------------------------GCC-UAGUGG-CU-AU-GGC--G-G-A-GGGG-A-AACAC-CCG-UUC--C--CAUC-CCGAA-CACGGA-A----GUUAAG-CCCUCC-AGCG-CCG-AUG-GU-AGU-UGGGGCC-----AGC---GC-CCC--UGCA--AGAGUAGG-UCG--CUGCUAG-G------------------------------------------------

>Accession:BA000043::SeqID:108591::TaxID:2
------------------------------------------------------------------------------------------------------------------------------GUGG-UG-AU-AGC--G-G-A-GGGG-A-AACAC-CCG-UUC--C--CAUC-CCGAA-CACGGA-A----GUUAAG-CCCUCC-AGCG-CCG-AUG-GU-AGU-UGGGGCC-----AGC---GC-CCC--UGCA--AGAGUAGG-UCG--CUGCUAG-GCAAAC-------------------------------------------

>Accession:M10816::SeqID:108668::TaxID:2
-------------------------------------------------------------------------------------------------------------------------CC-UAGUGA-CA-AU-AGC--G-G-A-GAGG-A-AACAC-CCG-UUC--C--CAUC-CCGAA-CACGGA-A----GUUAAG-CUCUCC-AGCG-CCG-AUG-GU-AGU-UGGGGC------CAGC--GC-CCC--UGCA--AGAGUAGG-UCG--UUGCUAG-GC-----------------------------------------------

>Accession:AJ251080::SeqID:108669::TaxID:2
-------------------------------------------------------------------------------------------------------------------------CC-UAGUGG-UG-AU-AGC--G-G-A-GGGG-A-AACAC-CCG-UUC--C--CAUC-CCGAA-CACGGA-A----GUUAAG-CCCUCC-AGCG-CCG-AUG-GU-AGU-UGGGGC------CAGC--GC-CCC--UGCA--AGAGUAGG-UCG--CUGCUAG-GC-----------------------------------------------

>Accession:M25591::SeqID:108670::TaxID:2
-------------------------------------------------------------------------------------------------------------------------CC-UAGUGG-UG-AU-AGC--G-G-A-GGGG-A-AACAC-CCG-UUC--C--CAUC-CCGAA-CACGGA-A----GUUAAG-CCCUCC-AGCG-CCG-AUG-GU-AGU-UGGGGC------CAGC--GC-CCC--UGCA--AGAGUAGG-CCG--CUGCUAG-GC-----------------------------------------------

>Accession:M24839::SeqID:108671::TaxID:2
-------------------------------------------------------------------------------------------------------------------------CC-UAGUGA-CA-AU-AGC--GAG-A-GAGG-A-AACAC-CCG-UCU--C--CAUC-CCGAA-CACGAA-G----GUUAAG-CUCUCCCAGCG-CCG-AUG-GU-AGU-UGGGGC------CAGC--GC-CCC--UGCA--AGAGUAGG-UUG--UCGCUAG-GC-----------------------------------------------

>Accession:AE017180::SeqID:108828::TaxID:2
-----------------------------------------------------------------------------------------------------------------------------GGUGG-CU-AU-GCC--G-A-G-GGGG-U-CACAC-CCG-UUC--C--CAUC-UCGAA-CACGGA-A----GUUAAG-CCCCUC-UGGG-CCG-AUG-AU-ACU-GCACGG------GCAG--CU-GUG--UGGG--AAAGUAGG-UCG--CCGCCGG--------------------------------------------------

>Accession:AE017180::SeqID:108829::TaxID:2
-----------------------------------------------------------------------------------------------------------------------------GGUGG-CU-AU-GCC--G-A-G-GGGG-U-CACAC-CCG-UUC--C--CAUC-UCGAA-CACGGA-A----GUUAAG-CCCCUC-UGGG-CCG-AUG-AU-ACU-GCACGG------GCAG--CU-GUG--UGGG--AAAGUAGG-UCG--CCGCCGG--------------------------------------------------

>Accession:AE017209::SeqID:108830::TaxID:2
-----------------------------------------------------------------------------------------------------------------------------GGUGG-CU-AU-GCC--G-A-G-GGGG-U-CACAC-CCG-UUC--C--CAUC-UCGAA-CACGGA-A----GUUAAG-CCCCUC-UGGG-CCG-AUG-AU-ACU-GCACGG------GCAG--CU-GUG--UGGG--AAAGUAGG-UCG--CCGCCGG--------------------------------------------------

>Accession:AE017211::SeqID:108831::TaxID:2
-----------------------------------------------------------------------------------------------------------------------------GGUGG-CU-AU-GCC--G-A-G-GGGG-U-CACAC-CCG-UUC--C--CAUC-UCGAA-CACGGA-A----GUUAAG-CCCCUC-UGGG-CCG-AUG-AU-ACU-GCACGG------GCAG--CU-GUG--UGGG--AAAGUAGG-UCG--CCGCCGG--------------------------------------------------

>Accession:X55265::SeqID:109254::TaxID:2
-----------------------------------------------------------------------------------------------------------------------G-UUUCGGUGG-UC-AU-GGC--G-A-G-AGGG-A-AACGC-CCG-GUU--A--CAUU-CCGAA-CCCGGA-A----GCUAAG-CCUUUC-AGCG-CCG-AUG-GU-ACU-GCAGGG------GGGA--CC-CUG--UGGG--AGAGUAGA-ACA--CCACCGA-ACA----------------------------------------------

>Accession:AP006573::SeqID:110921::TaxID:2
-----------------------------------------------------------------------------------------------------------------------U-CC-UGGUGC-UC-A--GGC--G-C-A-GUGG-A-ACCACGCCG-AU---C--CAUC-CCGAA-CUCGGA-C----GUUAAA-CGCUGC-AGCA-GCG-AAG-AU-ACU-UGGAGG------GCAG--CU-UCC--UGGG--AAAAUAGC-CCG--GUGCCAG-GG-----------------------------------------------

>Accession:BA000045::SeqID:110928::TaxID:2
-----------------------------------------------------------------------------------------------------------------------U-CC-UGGUGC-UC-A--GGC--G-C-A-GUGG-A-ACCACGCCG-AU---C--CAUC-CCGAA-CUCGGA-C----GUUAAA-CGCUGC-AGCA-GCG-AAG-AU-ACU-UGGAGG------GCAG--CU-UCC--UGGG--AAAAUAGC-CCG--GUGCCAG-GG-----------------------------------------------

>Accession:M76572::SeqID:114151::TaxID:2
---------------------------------------------------------------------------------------------------------------------AGA-CC-UGGUGG-CA-AU-GGC--G-G-G-GAAU-A-UCCAC-CCG-AUC--C--CAUC-CCGAA-CUCGGC-C----GUGAAA-UGCCCC-AGCG-CCC-AUG-AU-ACU-GUGCC-------UUAA---G-GCA--CGGG--AAAGUCGG-UCG--CCGCCAG-GUCU---------------------------------------------

>Accession:M76577::SeqID:114182::TaxID:2
---------------------------------------------------------------------------------------------------------------------RGA-CC-UGGUGG-CC-AU-UGC--G-A-G-GGCC-C-UACAC-CCG-AUC--C--CAUC-CCGAA-CUCGGC-C----GUGAAA-UCCCUC-AGCG-CCU-AUG-AU-ACC-GUACC-------UUAA---G-GUG--CGGA--AAAGUCGG-UCG--CCGCCAG-GUCC---------------------------------------------

>Accession:M76579::SeqID:114183::TaxID:2
---------------------------------------------------------------------------------------------------------------------GGA-CC-UGGUGG-CC-AU-UGC--G-A-G-GGCC-C-UACAC-CCG-AUC--C--CUUC-CCGAA-CUCGGC-C----GUGAAA-UCCCUC-AGCG-CCU-AUG-AU-ACU-GCACC-------UCAA---G-GUG--CGGA--AAAGUCGG-UCG--CCGCCAG-GUCC---------------------------------------------

>Accession:CP000009::SeqID:114215::TaxID:2
--------------------------------------------------------------------------------------------------------------------------C-UGGUGG-CC-AU-UGC--G-A-G-GGCC-C-UACAC-CCG-AUC--C--CAUC-CCGAA-CUCGGC-C----GUGAAA-UCCCUC-AGCG-CCU-AUG-AU-ACU-GCACC-------UUAA---G-GUG--CGGA--AAAGUCGG-UCG--CCGCCAG-GUCCC--------------------------------------------

>Accession:CP000009::SeqID:114216::TaxID:2
--------------------------------------------------------------------------------------------------------------------------C-UGGUGG-CC-AU-UGC--G-A-G-GGCC-C-UACAC-CCG-AUC--C--CAUC-CCGAA-CUCGGC-C----GUGAAA-UCCCUC-AGCG-CCU-AUG-AU-ACU-GCACC-------UUAA---G-GUG--CGGA--AAAGUCGG-UCG--CCGCCAG-GUCCC--------------------------------------------

>Accession:CP000009::SeqID:114217::TaxID:2
-----------------------------------------------------------------------------------------------------------------------AC-C-UGGUGG-CC-AU-UGC--G-A-G-GGCC-C-UACAC-CCG-AUC--C--CAUC-CCGAA-CUCGGC-C----GUGAAA-UCCCUC-AGCG-CCU-AUG-AU-ACU-GCACC-------UUAA---G-GUG--CGGA--AAAGUCGG-UCG--CCGCCAG-GUCCC--------------------------------------------

>Accession:CP000009::SeqID:114218::TaxID:2
-----------------------------------------------------------------------------------------------------------------------AC-C-UGGUGG-CC-AU-UGC--G-A-G-GGCC-C-UACAC-CCG-AUC--C--CAUC-CCGAA-CUCGGC-C----GUGAAA-UCCCUC-AGCG-CCU-AUG-AU-ACU-GCACC-------UUAA---G-GUG--CGGA--AAAGUCGG-UCG--CCGCCAG-GUCCC--------------------------------------------

>Accession:X16193::SeqID:116569::TaxID:2
---------------------------------------------------------------------------------------------------------------------UUG-CU-UGGCGA-CC-AU-AGC--G-C-U-UUGG-A-CCCAC-CUG-AUU--C--CAUG-CCGAA-CUCAGA-A----GUGAAA-CAGAGC-AGCG-CCG-AUG-GU-AGU-GUGGGG------UCU---CC-CCA--UGUG--AGAGUAGG-ACA--UCGCCAG-GCUU---------------------------------------------

>Accession:AE017143::SeqID:118386::TaxID:2
-------------------------------------------------------------------------------------------------------------------------UC-UGGCGA-CA-AC-AGU--G-C-A-GUGG-C-ACCAC-CUG-AAU--C--CAUC-CCGAA-CUCAGA-A----GUGAAA-CGCUGU-UACG-CCG-AUG-GU-AGU-GUGGGG------UUU---CC-CCA--UGUG--AGAGUAGG-UCA--UCGCC----------------------------------------------------

>Accession:AE017143::SeqID:118387::TaxID:2
-------------------------------------------------------------------------------------------------------------------------UC-UGGCGA-CA-AC-AGU--G-C-A-GUGG-C-ACCAC-CUG-AAU--C--CAUC-CCGAA-CUCAGA-A----GUGAAA-CGCUGU-UACG-CCG-AUG-GU-AGU-GUGGGG------UUU---CC-CCA--UGUG--AGAGUAGG-UCA--UCGCC----------------------------------------------------

>Accession:AE017143::SeqID:118388::TaxID:2
-------------------------------------------------------------------------------------------------------------------------UC-UGGCGA-CA-AC-AGU--G-C-A-GUGG-C-ACCAC-CUG-AAU--C--CAUC-CCGAA-CUCAGA-A----GUGAAA-CGCUGU-UACG-CCG-AUG-GU-AGU-GUGGGG------UUU---CC-CCA--UGUG--AGAGUAGG-UCA--UCGCC----------------------------------------------------

>Accession:AE017143::SeqID:118389::TaxID:2
-------------------------------------------------------------------------------------------------------------------------UC-UGGCGA-CA-AC-AGU--G-C-A-GUGG-C-ACCAC-CUG-AAU--C--CAUC-CCGAA-CUCAGA-A----GUGAAA-CGCUGU-UACG-CCG-AUG-GU-AGU-GUGGGG------UUU---CC-CCA--UGUG--AGAGUAGG-UCA--UCGCC----------------------------------------------------

>Accession:AE017143::SeqID:118390::TaxID:2
-------------------------------------------------------------------------------------------------------------------------UC-UGGCGA-CA-AC-AGU--G-C-A-GUGG-C-ACCAC-CUG-AAU--C--CAUC-CCGAA-CUCAGA-A----GUGAAA-CGCUGU-UACG-CCG-AUG-GU-AGU-GUGGGG------UUU---CC-CCA--UGUG--AGAGUAGG-UCA--UCGCC----------------------------------------------------

>Accession:AE017143::SeqID:118391::TaxID:2
-------------------------------------------------------------------------------------------------------------------------UC-UGGCGA-CA-AC-AGU--G-C-A-GUGG-C-ACCAC-CUG-AAU--C--CAUC-CCGAA-CUCAGA-A----GUGAAA-CGCUGU-UACG-CCG-AUG-GU-AGU-GUGGGG------UUU---CC-CCA--UGUG--AGAGUAGG-UCA--UCGCC----------------------------------------------------

>Accession:AE017151::SeqID:118392::TaxID:2
-------------------------------------------------------------------------------------------------------------------------UC-UGGCGA-CA-AC-AGU--G-C-A-GUGG-C-ACCAC-CUG-AAU--C--CAUC-CCGAA-CUCAGA-A----GUGAAA-CGCUGU-UACG-CCG-AUG-GU-AGU-GUGGGG------UUU---CC-CCA--UGUG--AGAGUAGG-UCA--UCGCC----------------------------------------------------

>Accession:AE017151::SeqID:118393::TaxID:2
-------------------------------------------------------------------------------------------------------------------------UC-UGGCGA-CA-AC-AGU--G-C-A-GUGG-C-ACCAC-CUG-AAU--C--CAUC-CCGAA-CUCAGA-A----GUGAAA-CGCUGU-UACG-CCG-AUG-GU-AGU-GUGGGG------UUU---CC-CCA--UGUG--AGAGUAGG-UCA--UCGCC----------------------------------------------------

>Accession:AE017152::SeqID:118394::TaxID:2
-------------------------------------------------------------------------------------------------------------------------UC-UGGCGA-CA-AC-AGU--G-C-A-GUGG-C-ACCAC-CUG-AAU--C--CAUC-CCGAA-CUCAGA-A----GUGAAA-CGCUGU-UACG-CCG-AUG-GU-AGU-GUGGGG------UUU---CC-CCA--UGUG--AGAGUAGG-UCA--UCGCC----------------------------------------------------

>Accession:AE017153::SeqID:118395::TaxID:2
-------------------------------------------------------------------------------------------------------------------------UC-UGGCGA-CA-AC-AGU--G-C-A-GUGG-C-ACCAC-CUG-AAU--C--CAUC-CCGAA-CUCAGA-A----GUGAAA-CGCUGU-UACG-CCG-AUG-GU-AGU-GUGGGG------UUU---CC-CCA--UGUG--AGAGUAGG-UCA--UCGCC----------------------------------------------------

>Accession:AE017156::SeqID:118396::TaxID:2
-------------------------------------------------------------------------------------------------------------------------UC-UGGCGA-CA-AC-AGU--G-C-A-GUGG-C-ACCAC-CUG-AAU--C--CAUC-CCGAA-CUCAGA-A----GUGAAA-CGCUGU-UACG-CCG-AUG-GU-AGU-GUGGGG------UUU---CC-CCA--UGUG--AGAGUAGG-UCA--UCGCC----------------------------------------------------

>Accession:AE017156::SeqID:118397::TaxID:2
-------------------------------------------------------------------------------------------------------------------------UC-UGGCGA-CA-AC-AGU--G-C-A-GUGG-C-ACCAC-CUG-AAU--C--CAUC-CCGAA-CUCAGA-A----GUGAAA-CGCUGU-UACG-CCG-AUG-GU-AGU-GUGGGG------UUU---CC-CCA--UGUG--AGAGUAGG-UCA--UCGCC----------------------------------------------------

>Accession:AE017143::SeqID:118398::TaxID:2
-----------------------------------------------------------------------------------------------------------------------G-AU-UAACAG-CA-AU-AGU--G-C-A-GUGG-U-CCCAC-CUG-AAU--C--CAUC-GCGAA-CUCAGA-A----GUGAAA-CGCUGU-UACG-CCG-AUG-GU-AGU-GUGGGG------CUU---CC-CCA--UGUG--AGAGUAGG-ACA--CUGUUA---------------------------------------------------

>Accession:AE017151::SeqID:118399::TaxID:2
-----------------------------------------------------------------------------------------------------------------------G-AU-UAACAG-CA-AU-AGU--G-C-A-GUGG-U-CCCAC-CUG-AAU--C--CAUC-GCGAA-CUCAGA-A----GUGAAA-CGCUGU-UACG-CCG-AUG-GU-AGU-GUGGGG------CUU---CC-CCA--UGUG--AGAGUAGG-ACA--CUGUUA---------------------------------------------------

>Accession:CP000057::SeqID:118431::TaxID:2
-------------------------------------------------------------------------------------------------------------------------UU-UGGCAG-AG-AU-AGU--G-C-A-AUAG-A-UCCAC-CUG-AUA--C--CAUA-CCGAA-CUCAGA-A----GUGAAA-UGUUGU-AACG-CUG-AUG-GU-AGU-GUGGGG------UUU---CC-CCA--UGUG--AGAGUAAG-GCA--CUGCCA---------------------------------------------------

>Accession:CP000057::SeqID:118432::TaxID:2
-------------------------------------------------------------------------------------------------------------------------CC-UGGCGG-CG-AU-AGU--G-C-G-GUGG-A-CCCAC-CUG-AGA--C--CAUA-CCGAA-CUCAGA-A----GUGAAA-CGCUGU-AAUG-CCG-AUG-GU-AGU-GUGGGG------UUU---CC-CCA--UGUG--AGAGUAGG-GCA--CCGCCGG-G------------------------------------------------

>Accession:CP000057::SeqID:118433::TaxID:2
-------------------------------------------------------------------------------------------------------------------------CC-UGGCGG-CG-AU-AGU--G-C-G-GUGG-A-CCCAC-CUG-AGA--C--CAUA-CCGAA-CUCAGA-A----GUGAAA-CGCUGU-AAUG-CCG-AUG-GU-AGU-GUGGGG------UUU---CC-CCA--UGUG--AGAGUAGG-GCA--CCGCCAG-G------------------------------------------------

>Accession:CP000057::SeqID:118434::TaxID:2
-------------------------------------------------------------------------------------------------------------------------CU-UGGCGG-CG-AU-AGU--G-C-G-GUGG-A-CCCAC-CUG-AGA--C--CAUA-CCGAA-CUCAGA-A----GUGAAA-CGCUGU-AAUG-CCG-AUG-GU-AGU-GUGGGG------UUU---CC-CCA--UGUG--AGAGUAGG-GCA--CCGCCAG-G------------------------------------------------

>Accession:CP000057::SeqID:118435::TaxID:2
-------------------------------------------------------------------------------------------------------------------------CU-UGGCGG-CG-AU-AGU--G-C-G-GUGG-A-CCCAC-CUG-AGA--C--CAUA-CCGAA-CUCAGA-A----GUGAAA-CGCUGU-AAUG-CCG-AUG-GU-AGU-GUGGGG------UUU---CC-CCA--UGUG--AGAGUAGG-GCA--CCGCCAG-G------------------------------------------------

>Accession:CP000057::SeqID:118436::TaxID:2
--------------------------------------------------------------------------------------------------------------------------C-UGGCGG-CG-AU-AGU--G-C-G-GUGG-A-CCCAC-CUG-AGA--C--CAUA-CCGAA-CUCAGA-A----GUGAAA-CGCUGU-AAUG-CCG-AUG-GU-AGU-GUGGGG------UUU---CC-CCA--UGUG--AGAGUAGG-GCA--CCGCCAG-GU-----------------------------------------------

>Accession:CP000057::SeqID:118437::TaxID:2
-----------------------------------------------------------------------------------------------------------------------U-CC-UGGCGG-CG-AU-AGU--G-C-G-GUGG-A-CCCAC-CUG-AGA--C--CAUA-CCGAA-CUCAGA-A----GUGAAA-CGCUGU-AAUG-CCG-AUG-GU-AGU-GUGGGG------UUU---CC-CCA--UGUG--AGAGUAGG-GCA--CCGCCAG--------------------------------------------------

>Accession:U32688::SeqID:118438::TaxID:2
-------------------------------------------------------------------------------------------------------------------------CC-UGGCGG-CG-AU-AGU--G-C-G-GUGG-A-CCCAC-CUG-AGA--C--CAUA-CCGAA-CUCAGA-A----GUGAAA-CGCUGU-AAUG-CCG-AUG-GU-AGU-GUGGGG------UUU---CC-CCA--UGUG--AGAGUAGG-GCA--CCGCCAG-G------------------------------------------------

>Accession:L42023::SeqID:118798::TaxID:2
-------------------------------------------------------------------------------------------------------------------------CC-UGGCGG-CG-AU-AGU--G-C-G-GUGG-A-CCCAC-CUG-AGA--C--CAUA-CCGAA-CUCAGA-A----GUGAAA-CGCUGU-AAUG-CCG-AUG-GU-AGU-GUGGGG------UUU---CC-CCA--UGUG--AGAGUAGG-GCA--CCG------------------------------------------------------

>Accession:U32697::SeqID:118799::TaxID:2
-------------------------------------------------------------------------------------------------------------------------CC-UGGCGG-CG-AU-AGU--G-C-G-GUGG-A-CCCAC-CUG-AGA--C--CAUA-CCGAA-CUCAGA-A----GUGAAA-CGCUGU-AAUG-CCG-AUG-GU-AGU-GUGGGG------UUU---CC-CCA--UGUG--AGAGUAGG-GCA--CCGCCAG-G------------------------------------------------

>Accession:U32707::SeqID:118800::TaxID:2
-------------------------------------------------------------------------------------------------------------------------CC-UGGCGG-CG-AU-AGU--G-C-G-GUGG-A-CCCAC-CUG-AGA--C--CAUA-CCGAA-CUCAGA-A----GUGAAA-CGCUGU-AAUG-CCG-AUG-GU-AGU-GUGGGG------UUU---CC-CCA--UGUG--AGAGUAGG-GCA--CCGCCAG-G------------------------------------------------

>Accession:U32742::SeqID:118801::TaxID:2
-------------------------------------------------------------------------------------------------------------------------CC-UGGCGG-CG-AU-AGU--G-C-G-GUGG-A-CCCAC-CUG-AGA--C--CAUA-CCGAA-CUCAGA-A----GUGAAA-CGCUGU-AAUG-CCG-AUG-GU-AGU-GUGGGG------UUU---CC-CCA--UGUG--AGAGUAGG-GCA--CCGCCAG-G------------------------------------------------

>Accession:U32745::SeqID:118802::TaxID:2
-------------------------------------------------------------------------------------------------------------------------CC-UGGCGG-CG-AU-AGU--G-C-G-GUGG-A-CCCAC-CUG-AGA--C--CAUA-CCGAA-CUCAGA-A----GUGAAA-CGCUGU-AAUG-CCG-AUG-GU-AGU-GUGGGG------UUU---CC-CCA--UGUG--AGAGUAGG-GCA--CCGCCAG-G------------------------------------------------

>Accession:U32755::SeqID:118803::TaxID:2
--------------------------------------------------------------------------------------------------------------------------C-UGGCGG-CG-AU-AGU--G-C-G-GUGG-A-CCCAC-CUG-AGA--C--CAUA-CCGAA-CUCAGA-A----GUGAAA-CGCUGU-AAUG-CCG-AUG-GU-AGU-GUGGGG------UUU---CC-CCA--UGUG--AGAGUAGG-GCA--CCGCCAG-GU-----------------------------------------------

>Accession:U32847::SeqID:118804::TaxID:2
-------------------------------------------------------------------------------------------------------------------AUUAU-CC-UGGCGG-CG-AU-AGU--G-C-G-GUGG-A-CCCAC-CUG-AGA--C--CAUA-CCGAA-CUCAGA-A----GUGAAA-CGCUGU-AAUG-CCG-AUG-GU-AGU-GUGGGG------UUU---CC-CCA--UGUG--AGAGUAGG-GCA--CCG------------------------------------------------------

>Accession:L42023::SeqID:118805::TaxID:2
-------------------------------------------------------------------------------------------------------------------------CC-UGGCGG-CG-AU-AGU--G-C-G-GUGG-A-CCCAC-CUG-AGA--C--CAUA-CCGAA-CUCAGA-A----GUGAAA-CGCUGU-AAUG-CCG-AUG-GU-AGU-GUGGGG------UUU---CC-CCA--UGUG--AGAGUAGG-GCA--CCGCCAG-G------------------------------------------------

>Accession:D00109::SeqID:118818::TaxID:2
-------------------------------------------------------------------------------------------------------------------------UC-UGGCGG-CG-AU-AGU--G-C-G-GUGG-A-CCCAC-CUG-AGA--C--CAUA-CCGAA-CUCAGA-A----GUGAAA-CGCUGU-AAUG-CCG-AUG-GU-AGU-GUGGGG------UUU---CC-CCA--UGUG--AGAGUAGG-GCA--CCGCCAG-GU-----------------------------------------------

>Accession:X05519::SeqID:118819::TaxID:2
-------------------------------------------------------------------------------------------------------------------------UC-UGGCGG-CG-AU-AGU--G-C-G-GUGG-A-CCCAC-CUG-AGA--C--CAUA-CCGAA-CUCAGA-A----GUGAAA-CGCUGU-AAUG-CCG-AUG-GU-AGU-GUGGGG------UUU---CC-CCA--UGUG--AGAGUAGG-GCA--CCGCCAG-GU-----------------------------------------------

>Accession:CP000155::SeqID:118940::TaxID:2
----------------------------------------------------------------------------------------------------------------------UG-CC-UGAUGA-UC-AU-AGC--G-G-A-CUGG-A-ACCAC-CUG-AUC--C--CAUU-CCGAA-CUCAGA-A----GUGAAA-CAGUCC-AGCG-CCG-AUG-GU-AGU-GUGG--------AUUC-----CCA--UGCA--AGAGUAGG-UCG--UCGUCAG--------------------------------------------------

>Accession:CP000155::SeqID:118941::TaxID:2
----------------------------------------------------------------------------------------------------------------------UG-CC-UGAUGA-UC-AU-AGC--G-G-A-CUGG-A-ACCAC-CUG-AUC--C--CAUU-CCGAA-CUCAGA-A----GUGAAA-CAGUCC-AGCG-CCG-AUG-GU-AGU-GUGG--------AUUC-----CCA--UGCA--AGAGUAGG-UCG--UCGUCAG-GC-----------------------------------------------

>Accession:CP000155::SeqID:118942::TaxID:2
----------------------------------------------------------------------------------------------------------------------UG-CC-UGAUGA-UC-AU-AGC--G-G-A-CUGG-A-ACCAC-CUG-AUC--C--CAUU-CCGAA-CUCAGA-A----GUGAAA-CAGUCC-AGCG-CCG-AUG-GU-AGU-GUGG--------AUUC-----CCA--UGCA--AGAGUAGG-UCG--UCGUCAG-GC-----------------------------------------------

>Accession:CP000155::SeqID:118943::TaxID:2
----------------------------------------------------------------------------------------------------------------------UG-CC-UGAUGA-UC-AU-AGC--G-G-A-CUGG-A-ACCAC-CUG-AUC--C--CAUU-CCGAA-CUCAGA-A----GUGAAA-CAGUCC-AGCG-CCG-AUG-GU-AGU-GUGG--------AUUC-----CCA--UGCA--AGAGUAGG-UCG--UCGUCAG-GC-----------------------------------------------

>Accession:CP000155::SeqID:118944::TaxID:2
----------------------------------------------------------------------------------------------------------------------UG-CC-UGAUGA-UC-AU-AGC--G-G-A-CUGG-A-ACCAC-CUG-AUC--C--CAUU-CCGAA-CUCAGA-A----GUGAAA-CAGUCC-AGCG-CCG-AUG-GU-AGU-GUGG--------AUUC-----CCA--UGCA--AGAGUAGG-UCG--UCGUCAG-GC-----------------------------------------------

>Accession:X05052::SeqID:121212::TaxID:2
----------------------------------------------------------------------------------------------------------------------UG-CC-UGGCGA-CC-AU-AGC--G-A-G-CGGG-A-ACCAC-CCG-AUC--C--GAUG-CCGAA-CUCGGC-A----GUGAAA-CCGCUC-AGCG-CCG-AUG-GU-AGU-GCGACC------ACGC--UG-UCG--UGCG--AGAGUAGG-UCA--UCGCCAG-GCCC---------------------------------------------

>Accession:M11537::SeqID:121358::TaxID:2
-----------------------------------------------------------------------------------------------------------------------G-CC-UGGUGU-CC-AU-AGA--G-C-G-GUGG-A-ACCAC-CUG-UUC--C--CAUC-CCGAA-CACAGA-A----GUGAAA-CGCCGC-AUCG-CCG-AUG-AU-AGU-GUGGGG------UCU---CC-CCA--UGUG--AAAGUAGG-UCA--ACGCCAG-GCUC---------------------------------------------

>Accession:AE017125::SeqID:122652::TaxID:2
----------------------------------------------------------------------------------------------------------------UCCCUUUU-UC-UUGUGU-UU-AU-AGA--G-A-G-AAGG-C-AACAC-CCA-GCU--C--CAUU-CCGAA-CCUGGC-A----GUUAAG-CUUCUC-UUCG-CCG-AUG-AU-ACU-GCAUCU------UUC---AG-GUG--UGGG--AAUGUAGG-UCG--AUGCAGG-GAUAGGGAAA---------------------------------------

>Accession:AE017147::SeqID:122653::TaxID:2
----------------------------------------------------------------------------------------------------------------UCCCUUUU-UC-UUGUGU-UU-AU-AGA--G-A-G-AAGG-C-AACAC-CCA-GCU--C--CAUU-CCGAA-CCUGGC-A----GUUAAG-CUUCUC-UUCG-CCG-AUG-AU-ACU-GCAUCU------UUC---AG-GUG--UGGG--AAUGUAGG-UCG--AUGCAGG-GAUAGGGAAA---------------------------------------

>Accession:AF487344::SeqID:122731::TaxID:2
----------------------------------------------------------------------------------------------------------------UCCCUUUU-CC-UUGUGC-CU-UU-AGA--G-A-A-GAGG-A-ACUAC-CCA-GUUAAC--CAUU-CCGAA-CCUGGA-A----GUCAAG-CUCUUC-AUCG-CUG-AUA-AU-ACU-GCUUUU------UUC---AA-GAG--UGGG--AAUGUAGG-UCG--GUGCAGG-GAUAGGGAAAU--------------------------------------

>Accession:AY487825::SeqID:122732::TaxID:2
----------------------------------------------------------------------------------------------------------------UCCCUUUU-CC-UUGUGC-CU-UU-AGA--G-A-A-GAGG-A-ACUAC-CCA-GUUAAC--CAUU-CCGAA-CCUGGA-A----GUCAAG-CUCUUC-AUCG-CUG-AUA-AU-ACU-GCUCUU------UUC---AA-GAG--UGGG--AAUGUAGG-UCG--GUGCAGG-GAUAGGGAAAU--------------------------------------

>Accession:AE000511::SeqID:122879::TaxID:2
----------------------------------------------------------------------------------------------------------------------UU-CC-UUGUGC-CU-UU-AGA--G-A-A-GAGG-A-ACUAC-CCA-GUUAAC--CAUU-CCGAA-CCUGGA-A----GUCAAG-CUCUUC-AUCG-CUG-AUA-AU-ACU-GCUCUU------UUC---AA-GAG--UGGG--AAUGUAGG-UCG--GUGCAGG-GAUA---------------------------------------------

>Accession:M35310::SeqID:124573::TaxID:2
-------------------------------------------------------------------------------------------------------------------------UC-CGGUGG-CA-AU-GUC--G-G-A-GGGG-U-CCCAC-CCG-UUC--C--CAUC-CCGAA-CACGGA-A----GUUAAG-CCCUCC-AGAG-CCG-AUG-GU-ACU-CCGCGG------GGAA--CC-GCG--CGGG--AGAGUAGG-UCG--CUGCCGG-AU-----------------------------------------------

>Accession:AJ131597::SeqID:132822::TaxID:2
----------------------------------------------------------------------------------------------------------------------UG-CC-UGACGA-CC-AU-AGC--G-A-G-GUGG-U-ACCAC-UCC-UUC--C--CAUC-CCGAA-CAGGAC-A----GUGAAA-CGCCUU-UGCG-CCG-AUG-AU-AGU-GCGG--------GUUC-----CCG--UGUG--AAAGUAGG-UCA--UCGUCAG-GM-----------------------------------------------

>Accession:AJ131598::SeqID:132823::TaxID:2
----------------------------------------------------------------------------------------------------------------------UG-CC-UGACGA-CC-AU-AGC--G-A-G-UUGG-U-CCCAC-UCC-UUC--C--CAUC-CCGAA-CAGGAC-A----GUGAAA-CGACUU-UGCG-CCG-AUG-AU-AGU-GAGG--------GUUC-----CCG--UGUG--AAAGUAGG-UCA--UCGUCAG-GM-----------------------------------------------

>Accession:AJ131599::SeqID:132852::TaxID:2
----------------------------------------------------------------------------------------------------------------------UG-CC-UGACGA-CC-AU-AGC--G-A-G-GUGG-U-ACCAC-UCC-UUC--C--CAUC-CCGAA-CAGGAC-A----GUGAAA-CGCCUU-UGCG-CCG-AUG-AU-AGU-GCGG--------GUUC-----CCG--UGUG--AAAGUAGG-UCA--UCGUCAG-GM-----------------------------------------------

>Accession:M34769::SeqID:134452::TaxID:2
----------------------------------------------------------------------------------------------------------------------GA-CC-UGGUGA-UU-AU-GGC--G-G-G-GUGG-C-UGCAC-CCG-AUC--C--CAUU-CCGAA-CUCGGC-C----GUGAAA-CGCCCC-UGCG-CCG-AUG-GU-ACU-UCGUC-------UUAA---G-ACG--CGGG--AGAGUAGG-UCG--UUGCCAG-GUCU---------------------------------------------

>Accession:M34768::SeqID:134476::TaxID:2
----------------------------------------------------------------------------------------------------------------------GA-CC-UGGUGA-UU-AU-GGC--G-G-G-UGGU-C-UGCAC-CCG-AUC--U--CAUU-CCGAA-CUCGGC-C----GUGAAA-CCGCCC-AGCG-CCA-AUG-GU-ACU-UCGUC-------UUAA---G-ACG--CGGG--AGAGUAGG-UCG--UCGCCAG-GUCU---------------------------------------------

>Accession:AE017340::SeqID:135877::TaxID:2
----------------------------------------------------------------------------------------------------------------------UG-UC-UGGCGG-CC-AU-AGC--G-G-U-GUGG-C-ACCAC-CUG-AAU--C--CAUU-CCGAA-CUCAGA-A----GUGAAA-CACACC-AGCG-CCG-AUG-GU-AGU-GUGGGG------UCU---CC-CCA--UGCG--AGAGUAGG-UCA--CCGCCAG-ACU----------------------------------------------

>Accession:AE017340::SeqID:135878::TaxID:2
----------------------------------------------------------------------------------------------------------------------UG-UC-UGGCGG-CC-AU-AGC--G-G-U-GUGG-C-ACCAC-CUG-AAU--C--CAUU-CCGAA-CUCAGA-A----GUGAAA-CACACC-AGCG-CCG-AUG-GU-AGU-GUGGGG------UCU---CC-CCA--UGCG--AGAGUAGG-UCA--CCGCCAG-ACU----------------------------------------------

>Accession:AE017340::SeqID:135879::TaxID:2
----------------------------------------------------------------------------------------------------------------------UG-UC-UGGCGG-CC-AU-AGC--G-G-U-GUGG-C-ACCAC-CUG-AAU--C--CAUU-CCGAA-CUCAGA-A----GUGAAA-CACACC-AGCG-CCG-AUG-GU-AGU-GUGGGG------UCU---CC-CCA--UGCG--AGAGUAGG-UCA--CCGCCAG-ACU----------------------------------------------

>Accession:AE017340::SeqID:135880::TaxID:2
----------------------------------------------------------------------------------------------------------------------UG-UC-UGGCGG-CC-AU-AGC--G-G-U-GUGG-C-ACCAC-CUG-AAU--C--CAUU-CCGAA-CUCAGA-A----GUGAAA-CACACC-AGCG-CCG-AUG-GU-AGU-GUGGGG------UCU---CC-CCA--UGCG--AGAGUAGG-UCA--CCGCCAG-ACUACAA------------------------------------------

>Accession:M35169::SeqID:137324::TaxID:2
-----------------------------------------------------------------------------------------------------------------------C-UC-CGGUGA-CC-AU-ACC--G-U-C-GGGG-U-CCUAC-CCG-UUC--C--CAUU-CCGAA-CACGGC-C----GUCAAG-CCCGCC--GGG-CCU-AUG-AU-AGU-GC----------GUCA-------G--CGCG--AAAGUCGG-UGA--UCGCCGG-AUCU---------------------------------------------

>Accession:Z50055::SeqID:138972::TaxID:2
-----------------------------------------------------------------------------------------------------------------------G-UUACGGUGG-UU-AU-AGC--G-A-A-GAGG-A-AACGC-CCG-GUC--C--CAUU-CCGAA-CCCGGA-A----GCUAAG-CUCUUC-AGCG-CCG-AUG-GU-ACU-GCACUG------GGUA--CG-GUG--UGGG--AGAGUAGG-UCG--CCGCCGU-AAU----------------------------------------------

>Accession:Z50736::SeqID:140703::TaxID:2
-----------------------------------------------------------------------------------------------------------------------G-UUUCGGUGG-UG-UU-GGC--G-G-A-GGGG-A-AACGC-CCG-GUC--C--CAUU-CCGAA-CCCGGA-A----GCUAAG-CCCUCC-UGCG-CCG-AUG-GU-ACU-GCACUC------GUGA--GG-GUG--UGGG--AGAGUAGG-ACG--CUGCCGA-ACA----------------------------------------------

>Accession:CP000033::SeqID:141599::TaxID:2
--------------------------------------------------------------------------------------------------------------------------A-CGGUGG-CG-AA-AGC--A-A-G-AAGG-A-UACAC-CUG-UUC--C--CAUG-CCGAA-CACAGA-A----GUUAAG-CUUCUU-AACG-CCG-AAA-GU-AGU-UGGUGG------GCAA--CU-GCC--UGCG--AGGAUAGG-AAG--CUGCCGU-G-CU---------------------------------------------

>Accession:CP000033::SeqID:141600::TaxID:2
--------------------------------------------------------------------------------------------------------------------------A-CGGUGG-CG-AA-AGC--A-A-G-AAGG-A-UACAC-CUG-UUC--C--CAUG-CCGAA-CACAGA-A----GUUAAG-CUUCUU-AACG-CCG-AAA-GU-AGU-UGGUGG------GCAA--CU-GCC--UGCG--AGGAUAGG-AAG--CUGCCGU-G-CU---------------------------------------------

>Accession:CP000033::SeqID:141601::TaxID:2
--------------------------------------------------------------------------------------------------------------------------A-CGGUGG-CG-AA-AGC--A-A-G-AAGG-A-UACAC-CUG-UUC--C--CAUG-CCGAA-CACAGA-A----GUUAAG-CUUCUU-AACG-CCG-AAA-GU-AGU-UGGUGG------GCAA--CU-GCC--UGCG--AGGAUAGG-AAG--CUGCCGU-G-CU---------------------------------------------

>Accession:CP000033::SeqID:141602::TaxID:2
--------------------------------------------------------------------------------------------------------------------------A-CGGUGG-CG-AA-AGC--A-A-G-AAGG-A-UACAC-CUG-UUC--C--CAUG-CCGAA-CACAGA-A----GUUAAG-CUUCUU-AACG-CCG-AAA-GU-AGU-UGGUGG------GCAA--CU-GCC--UGCG--AGGAUAGG-AAG--CUGCCGU-G-CU---------------------------------------------

>Accession:X02026::SeqID:141665::TaxID:2
-------------------------------------------------------------------------------------------------------------------------UG-UGGUGG-CG-AU-AGC--C-U-G-AAGG-A-UACAC-CUG-UUC--C--CAUG-CCGAA-CACAGA-A----GUUAAG-CUUCAG-CACG-CCG-AUA-GU-AGU-UGGGGG------AUCG--CC-CCC--UGCG--AGGAUAGG-ACG--UUGCCAC-GC-----------------------------------------------

>Accession:X15245::SeqID:141879::TaxID:2
-------------------------------------------------------------------------------------------------------------------------UG-CGGUGG-CA-AU-GGC--A-A-G-AAGG-A-UACAC-CUG-UUC--C--CAUG-CCGAA-CACAGU-A----GUUAAG-CUUCUU-AACG-CCG-AAA-GU-AGU-UGGUGG------GAAA--CU-GCC--UGCG--AGGAUAGG-AAG--CUGCCGC-GC-----------------------------------------------

>Accession:AE017198::SeqID:142045::TaxID:2
--------------------------------------------------------------------------------------------------------------------------A-CGGUGG-CG-AU-GGC--A-A-G-AAGG-A-UACAC-CUG-UUC--C--CAUG-CCGAA-CACAGA-A----GUUAAG-CUUCUU-AACG-CCG-AGA-GU-AGU-UGGUGG------GAAA--CU-GCC--UGCG--AGGGUAGG-CAG--UCGCCGU-GCU----------------------------------------------

>Accession:AE017198::SeqID:142046::TaxID:2
--------------------------------------------------------------------------------------------------------------------------A-CGGUGG-CG-AU-GGC--A-A-G-AAGG-A-UACAC-CUG-UUC--C--CAUG-CCGAA-CACAGA-A----GUUAAG-CUUCUU-AACG-CCG-AGA-GU-AGU-UGGUGG------GAAA--CU-GCC--UGCG--AGGGUAGG-CAG--UCGCCGU-GCU----------------------------------------------

>Accession:AE017198::SeqID:142047::TaxID:2
--------------------------------------------------------------------------------------------------------------------------A-CGGUGG-CG-AU-GGC--A-A-G-AAGG-A-UACAC-CUG-UUC--C--CAUG-CCGAA-CACAGA-A----GUUAAG-CUUCUU-AACG-CCG-AGA-GU-AGU-UGGUGG------GAAA--CU-GCC--UGCG--AGGGUAGG-CAG--UCGCCGU-GCU----------------------------------------------

>Accession:AE017198::SeqID:142048::TaxID:2
--------------------------------------------------------------------------------------------------------------------------A-CGGUGG-CG-AU-GGC--A-A-G-AAGG-A-UACAC-CUG-UUC--C--CAUG-CCGAA-CACAGA-A----GUUAAG-CUUCUU-AACG-CCG-AGA-GU-AGU-UGGUGG------GAAA--CU-GCC--UGCG--AGGGUAGG-CAG--UCGCCGU-GCU----------------------------------------------

>Accession:AE017198::SeqID:142049::TaxID:2
--------------------------------------------------------------------------------------------------------------------------A-CGGUGG-CG-AU-GGC--A-A-G-AAGG-A-UACAC-CUG-UUC--C--CAUG-CCGAA-CACAGA-A----GUUAAG-CUUCUU-AACG-CCG-AGA-GU-AGU-UGGUGG------GAAA--CU-GCC--UGCG--AGGGUAGG-CAG--UCGCCGU-GCU----------------------------------------------

>Accession:AE017198::SeqID:142050::TaxID:2
--------------------------------------------------------------------------------------------------------------------------A-CGGUGG-CG-AU-GGC--A-A-G-AAGG-A-UACAC-CUG-UUC--C--CAUG-CCGAA-CACAGA-A----GUUAAG-CUUCUU-AACG-CCG-AGA-GU-AGU-UGGUGG------GAAA--CU-GCC--UGCG--AGGGUAGG-CAG--UCGCCGU-GCU----------------------------------------------

>Accession:AE017201::SeqID:142051::TaxID:2
--------------------------------------------------------------------------------------------------------------------------A-CGGUGG-CG-AU-GGC--A-A-G-AAGG-A-UACAC-CUG-UUC--C--CAUG-CCGAA-CACAGA-A----GUUAAG-CUUCUU-AACG-CCG-AGA-GU-AGU-UGGUGG------GAAA--CU-GCC--UGCG--AGGGUAGG-CAG--UCGCCGU-GCU----------------------------------------------

>Accession:AE017205::SeqID:142052::TaxID:2
--------------------------------------------------------------------------------------------------------------------------A-CGGUGG-CG-AU-GGC--A-A-G-AAGG-A-UACAC-CUG-UUC--C--CAUG-CCGAA-CACAGA-A----GUUAAG-CUUCUU-AACG-CCG-AGA-GU-AGU-UGGUGG------GAAA--CU-GCC--UGCG--AGGGUAGG-CAG--UCGCCGU-GCU----------------------------------------------

>Accession:AE017205::SeqID:142053::TaxID:2
--------------------------------------------------------------------------------------------------------------------------A-CGGUGG-CG-AU-GGC--A-A-G-AAGG-A-UACAC-CUG-UUC--C--CAUG-CCGAA-CACAGA-A----GUUAAG-CUUCUU-AACG-CCG-AGA-GU-AGU-UGGUGG------GAAA--CU-GCC--UGCG--AGGGUAGG-CAG--UCGCCGU-GCU----------------------------------------------

>Accession:AE017205::SeqID:142054::TaxID:2
--------------------------------------------------------------------------------------------------------------------------A-CGGUGG-CG-AU-GGC--A-A-G-AAGG-A-UACAC-CUG-UUC--C--CAUG-CCGAA-CACAGA-A----GUUAAG-CUUCUU-AACG-CCG-AGA-GU-AGU-UGGUGG------GAAA--CU-GCC--UGCG--AGGGUAGG-CAG--UCGCCGU-GCU----------------------------------------------

>Accession:AE017206::SeqID:142055::TaxID:2
--------------------------------------------------------------------------------------------------------------------------A-CGGUGG-CG-AU-GGC--A-A-G-AAGG-A-UACAC-CUG-UUC--C--CAUG-CCGAA-CACAGA-A----GUUAAG-CUUCUU-AACG-CCG-AGA-GU-AGU-UGGUGG------GAAA--CU-GCC--UGCG--AGGGUAGG-CAG--UCGCCGU-GCU----------------------------------------------

>Accession:AE017206::SeqID:142056::TaxID:2
--------------------------------------------------------------------------------------------------------------------------A-CGGUGG-CG-AU-GGC--A-A-G-AAGG-A-UACAC-CUG-UUC--C--CAUG-CCGAA-CACAGA-A----GUUAAG-CUUCUU-AACG-CCG-AGA-GU-AGU-UGGUGG------GAAA--CU-GCC--UGCG--AGGGUAGG-CAG--UCGCCGU-GCU----------------------------------------------

>Accession:AL935253::SeqID:142400::TaxID:2
-------------------------------------------------------------------------------------------------------------------------UG-UGGUGA-CG-AU-GGC--G-A-G-AAGG-A-UACAC-CUG-UUC--C--CAUG-UCGAA-CACAGA-A----GUUAAG-CUUCUU-AGCG-CCG-AGA-GU-AGU-UGGGGG------AUCG--CU-CCC--UGCG--AGGGUAGG-ACG--UUGCCAU-GCGA---------------------------------------------

>Accession:AL935255::SeqID:142401::TaxID:2
-------------------------------------------------------------------------------------------------------------------------UG-UGGUGA-CG-AU-GGC--G-A-G-AAGG-A-UACAC-CUG-UUC--C--CAUG-UCGAA-CACAGA-A----GUUAAG-CUUCUU-AGCG-CCG-AGA-GU-AGU-UGGGGG------AUCG--CU-CCC--UGCG--AGGGUAGG-ACG--UUGCCAU-GCGA---------------------------------------------

>Accession:AL935258::SeqID:142402::TaxID:2
-------------------------------------------------------------------------------------------------------------------------UG-UGGUGA-CG-AU-GGC--G-A-G-AAGG-A-UACAC-CUG-UUC--C--CAUG-UCGAA-CACAGA-A----GUUAAG-CUUCUU-AGCG-CCG-AGA-GU-AGU-UGGGGG------AUCG--CU-CCC--UGCG--AGGGUAGG-ACG--UUGCCAU-GCGA---------------------------------------------

>Accession:AL935260::SeqID:142403::TaxID:2
-------------------------------------------------------------------------------------------------------------------------UG-UGGUGA-CG-AU-GGC--G-A-G-AAGG-A-UACAC-CUG-UUC--C--CAUG-UCGAA-CACAGA-A----GUUAAG-CUUCUU-AGCG-CCG-AGA-GU-AGU-UGGGGG------AUCG--CU-CCC--UGCG--AGGGUAGG-ACG--UUGCCAU-GCAA---------------------------------------------

>Accession:AL935261::SeqID:142404::TaxID:2
-------------------------------------------------------------------------------------------------------------------------UG-UGGUGA-CG-AU-GGC--G-A-G-AAGG-A-UACAC-CUG-UUC--C--CAUG-UCGAA-CACAGA-A----GUUAAG-CUUCUU-AGCG-CCG-AGA-GU-AGU-UGGGGG------AUCG--CU-CCC--UGCG--AGGGUAGG-ACG--UUGCCAU-GCAA---------------------------------------------

>Accession:AF401673::SeqID:142556::TaxID:2
--------------------------------------------------------------------------------------------------------------------------------------------------G-AAGG-A-UACAC-CUG-UUC--C--CAUG-CCGAA-CACAGU-A----GUUAAG-CUUCUU-AGCG-CCG-AUA-GU-AGU-UGGUGG------GAAA--CU-ACC--UGCG--AGGAUAGG-ACG--UUGCCAC-GU-----------------------------------------------

>Accession:CR936503::SeqID:142575::TaxID:2
----------------------------------------------------------------------------------------------------------------------------UGGUGG-CG-AU-AGC--A-A-G-AAGG-A-UACAC-CUG-UUC--C--CAUG-UCGAA-CACAGU-A----GUUAAG-CUUCUU-AGCG-CCG-AUA-GU-AGU-UGG----------------------------------------------------------------------------------------------------

>Accession:CR936503::SeqID:142576::TaxID:2
-------------------------------------------------------------------------------------------------------------------------UG-UGGUGG-CG-AU-AGC--A-A-G-AAGG-A-UACAC-CUG-UUC--C--CAUG-UCGAA-CACAGU-A----GUUAAG-CUUCUU-AGCG-CCG-AUA-GU-AGU-UGGUGG------GAAA--CU-ACC--UGCG--AGGAUAGG-ACG--UUGCCAC-G------------------------------------------------

>Accession:CR936503::SeqID:142577::TaxID:2
-------------------------------------------------------------------------------------------------------------------------UG-UGGUGG-CG-AU-AGC--A-A-G-AAGG-A-UACAC-CUG-UUC--C--CAUG-UCGAA-CACAGU-A----GUUAAG-CUUCUU-AGCG-CCG-AUA-GU-AGU-UGGUGG------GAAA--CU-ACC--UGCG--AGGAUAGG-ACG--UUGCCAC-G------------------------------------------------

>Accession:CR936503::SeqID:142578::TaxID:2
-------------------------------------------------------------------------------------------------------------------------UG-UGGUGG-CG-AU-AGC--A-A-G-AAGG-A-UACAC-CUG-UUC--C--CAUG-UCGAA-CACAGU-A----GUUAAG-CUUCUU-AGCG-CCG-AUA-GU-AGU-UGGUGG------GAAA--CU-ACC--UGCG--AGGAUAGG-ACG--UUGCCAC-G------------------------------------------------

>Accession:CR936503::SeqID:142579::TaxID:2
-------------------------------------------------------------------------------------------------------------------------UG-UGGUGG-CG-AU-AGC--A-A-G-AAGG-A-UACAC-CUG-UUC--C--CAUG-UCGAA-CACAGU-A----GUUAAG-CUUCUU-AGCG-CCG-AUA-GU-AGU-UGGUGG------GAAA--CU-ACC--UGCG--AGGAUAGG-ACG--UUGCCAC-G------------------------------------------------

>Accession:CR936503::SeqID:142580::TaxID:2
-------------------------------------------------------------------------------------------------------------------------UG-UGGUGG-CG-AU-AGC--A-A-G-AAGG-A-UACAC-CUG-UUC--C--CAUG-UCGAA-CACAGU-A----GUUAAG-CUUCUU-AGCG-CCG-AUA-GU-AGU-UGGUGG------GAAA--CU-ACC--UGCG--AGGAUAGG-ACG--UUGCCAC-G------------------------------------------------

>Accession:CR936503::SeqID:142581::TaxID:2
-------------------------------------------------------------------------------------------------------------------------UG-UGGUGG-CG-AU-AGC--A-A-G-AAGG-A-UACAC-CUG-UUC--C--CAUG-UCGAA-CACAGU-A----GUUAAG-CUUCUU-AGCG-CCG-AUA-GU-AGU-UGGUGG------GAAA--CU-ACC--UGCG--AGGAUAGG-ACG--UUGCCAC-G------------------------------------------------

>Accession:X00081::SeqID:142918::TaxID:2
--------------------------------------------------------------------------------------------------------------------U----UU-UGGUCA-UC-AU-UGC--G-A-U-GGAG-A-UACAC-CUG-UUC--C--CAUG-UCGAA-CACAGA-A----GUUAAG-UCCAUC-UACG-GCG-GAA-GU-ACU-UGGGGG------UUG---CC-CCC--UGGG--AGAUAUGC-GAG--UGGCCAA-GU-----------------------------------------------

>Accession:AY883053::SeqID:144703::TaxID:2
-----------------------------------------------------------------------------------------------------------------------U-CC-UGGCGA-GC-AU-AGC--C-G-U-UUGG-A-ACCAC-CUG-AUC--C--CAUC-UCGAA-CUCAGA-A----GUGAA------------------------------------------------------------------------------------------------------------------------------------

>Accession:AY883054::SeqID:144706::TaxID:2
-----------------------------------------------------------------------------------------------------------------------U-CC-UGGCGA-CC-AU-AGC--G-G-U-UUGG-A-ACCAC-CUG-AAU--C--CAUC-UCGAA-CUCAGA-A----GUGAA------------------------------------------------------------------------------------------------------------------------------------

>Accession:Z24682::SeqID:144708::TaxID:2
-----------------------------------------------------------------------------------------------------------------------U-CC-UGGCGA-CC-AU-AGC--G-G-U-UUGG-A-ACCAC-CUG-AAU--C--CAUC-UCGAA-CUCAGA-A----GUGAAA-CGAACC-CGCG-CCA-AUG-AU-AGU-GUGAGG------UUU---CC-UC--------------------------------------------------------------------------------

>Accession:AY883055::SeqID:144720::TaxID:2
-----------------------------------------------------------------------------------------------------------------------U-CC-UGGCGA-CC-AU-AGC--C-G-U-UUGG-A-ACCAC-CUG-A-U--C--CAUC-UCGAA-CUCAGA-A----GUGAA------------------------------------------------------------------------------------------------------------------------------------

>Accession:AY883056::SeqID:144721::TaxID:2
-----------------------------------------------------------------------------------------------------------------------U-CC-UGGCGA-CC-AU-AGC--C-G-U-UUGG-A-ACCAC-CUG-A-U--C--CAUC-UCGAA-CUCAGA-A----GUGAA------------------------------------------------------------------------------------------------------------------------------------

>Accession:AY883057::SeqID:144724::TaxID:2
-----------------------------------------------------------------------------------------------------------------------U-CC-UGGCGA-CC-AU-AGC--G-G-U-CUGG-A-ACCAC-CUG-ACU--C--CAUC-UCGAA-CUCAGA-A----GUGAA------------------------------------------------------------------------------------------------------------------------------------

>Accession:Z24683::SeqID:144727::TaxID:2
-----------------------------------------------------------------------------------------------------------------------U-CC-UGGCGA-CC-AU-AGC--G-G-U-UUGG-A-ACCAC-CUG-ACU--C--CAUC-UCGAA-CUCAGU-A----GUGAAA-CAGACC-AGCG-CCG-AUG-AU-AGU-GUGAGG------CUU---CC-UC--------------------------------------------------------------------------------

>Accession:Z30536::SeqID:144728::TaxID:2
-----------------------------------------------------------------------------------------------------------------------U-CC-UGGCGA-CC-AU-AGC--G-G-U-UUGG-A-ACCAC-CUG-ACU--C--CAUC-UCGAA-CUCAGU-A----GUGAAA-CAGACC-AGCG-CCG-AUG-AU-AGU-GUGAGG------CUU---CC-UC--------------------------------------------------------------------------------

>Accession:Z24684::SeqID:144731::TaxID:2
-----------------------------------------------------------------------------------------------------------------------U-CC-UGGCGA-CC-AU-AGC--G-G-U-UUGG-A-ACCAC-CUG-ACU--C--CAUC-UCGAA-CUCAGA-A----GUGAAA-CGAACC-CGCG-CCA-AUG-AU-AGU-GUGAGG------UUU---CC-UC--------------------------------------------------------------------------------

>Accession:AY883060::SeqID:144737::TaxID:2
-----------------------------------------------------------------------------------------------------------------------U-CC-UGGCGA-CC-AU-AGC--A-G-U-UUGG-A-ACCAC-CUG-AAU--C--CAUC-UCGAA-CUCAGA-A----GUGAA------------------------------------------------------------------------------------------------------------------------------------

>Accession:Z24687::SeqID:144739::TaxID:2
-----------------------------------------------------------------------------------------------------------------------U-CC-UGGCGA-CC-AU-AGC--A-G-U-UUGG-A-ACCAC-CUG-AAU--C--CAUC-UCGAA-CUCAGA-A----GUGAAA-CAGACU-CGCG-CCG-AUG-AU-AGU-GUGAGG------CUU---CC-UC--------------------------------------------------------------------------------

>Accession:AY883061::SeqID:144745::TaxID:2
-----------------------------------------------------------------------------------------------------------------------U-CC-UGGCGA-CC-AU-AGC--G-G-U-CCGG-C-CCCAC-CUG-AUC--C--CAUC-CCGAA-CUCAGA-A----GUGAA------------------------------------------------------------------------------------------------------------------------------------

>Accession:AY883064::SeqID:144748::TaxID:2
-----------------------------------------------------------------------------------------------------------------------U-CC-UGGCGA-CC-AU-AGC--G-G-U-UUGG-A-ACCAC-CUG-AUU--C--CAUC-UCGAA-CUCAGA-A----GUGAA------------------------------------------------------------------------------------------------------------------------------------

>Accession:AY883065::SeqID:144751::TaxID:2
-----------------------------------------------------------------------------------------------------------------------U-CC-UGGCGA-CC-AU-AGC--G-G-U-CUGG-A-ACCAC-CUG-ACU--C--CAUC-UCGAA-CUCAGA-A----GUGAA------------------------------------------------------------------------------------------------------------------------------------

>Accession:AY883066::SeqID:144752::TaxID:2
-----------------------------------------------------------------------------------------------------------------------U-CC-UGGCGA-CC-AU-AGC--G-G-U-CUGG-A-ACCAC-CUG-ACU--C--CAUC-UCGAA-CUCAGA-A----GUGAA------------------------------------------------------------------------------------------------------------------------------------

>Accession:AY883067::SeqID:144758::TaxID:2
-----------------------------------------------------------------------------------------------------------------------U-CC-UGGCGA-CC-AU-AGC--G-G-U-CUGG-A-ACCAC-CUG-AUU--C--CAUC-UCGAA-CUCAGU-A----GUGAA------------------------------------------------------------------------------------------------------------------------------------

>Accession:AY883068::SeqID:144768::TaxID:2
-----------------------------------------------------------------------------------------------------------------------U-CC-UGGCGA-CC-AU-AGC--G-G-U-UUGG-A-ACCAC-CUG-ACU--C--CAUC-UCGAA-CUCAGU-A----GUGAA------------------------------------------------------------------------------------------------------------------------------------

>Accession:AY883070::SeqID:144771::TaxID:2
-----------------------------------------------------------------------------------------------------------------------U-CC-UGGCGA-CC-AU-AGC--A-U-C-AUGG-A-ACCAC-CUG-ACC--C--CAUC-CCGAA-CUCAGC-A----GUGAA------------------------------------------------------------------------------------------------------------------------------------

>Accession:AY883069::SeqID:144772::TaxID:2
-----------------------------------------------------------------------------------------------------------------------U-CC-UGGCGAACC-AU-AGCC-A-U-C-AUGG-A-ACCAC-CUG-ACC--C--CAUC-CCGAA-CUCAGC-A----GUGAA------------------------------------------------------------------------------------------------------------------------------------

>Accession:AY883071::SeqID:144782::TaxID:2
-----------------------------------------------------------------------------------------------------------------------U-CC-UGGCGA-CU-AU-AGC--G-G-U-UUGG-A-ACCAC-CUG-AAU--C--CAUC-UCGAA-CUCAGA-A----GUGAA------------------------------------------------------------------------------------------------------------------------------------

>Accession:AY883072::SeqID:144787::TaxID:2
-----------------------------------------------------------------------------------------------------------------------U-CC-UGGCGA-CC-AU-AGC--C-G-U-UUGG-A-ACCAC-CUG-AUA--C--CAUC-CCGAA-CUCAGA-A----GUGAA------------------------------------------------------------------------------------------------------------------------------------

>Accession:AY883073::SeqID:144791::TaxID:2
-----------------------------------------------------------------------------------------------------------------------U-CC-UGGCGA-CC-AU-AGC--G-G-U-UUGG-A-ACCAC-CUG-AAU--C--CAUC-UCGAA-CUCAGA-A----GUGAA------------------------------------------------------------------------------------------------------------------------------------

>Accession:X05081::SeqID:144795::TaxID:2
-----------------------------------------------------------------------------------------------------------------------U-CU-UGGCGA-CU-AU-AGC--G-A-U-UUGG-A-ACCAC-CUG-AUA--C--CAUC-UCGAA-CUCAGA-A----GUGAAA-CAUUUC-CGCG-CCA-AUG-AU-AGU-GUGAGG------CUU---CC-UCA--UGCG--AAAGUAGG-UCA--UCGCCAG-GAU----------------------------------------------

>Accession:Y00159::SeqID:144796::TaxID:2
-----------------------------------------------------------------------------------------------------------------------U-CU-UGGCGA-CU-AU-AGC--G-A-U-UUGG-A-ACCAC-CUG-AUA--C--CAUC-UCGAA-CUCAGA-A----GUGAAA-CAUUUC-CGCG-CCA-AUG-AU-AGU-GUGAGG------CUU---CC-UCA--UGCG--AAAGUAGG-UCA--UCGCCAG-GAU----------------------------------------------

>Accession:CR628336::SeqID:144797::TaxID:2
-----------------------------------------------------------------------------------------------------------------------U-CC-UGGCGA-CU-AU-AGC--G-A-U-UUGG-A-ACCAC-CUG-AUA--C--CAUC-UCGAA-CUCAGA-A----GUGAAA-CAUUUC-CGCG-CCA-AUG-AU-AGU-GUGAGG------CUU---CC-UCA--UGCG--AAAGUAGG-UCA--UCGCCAG-GGUUuuauuuu--------------------------------------

>Accession:CR628336::SeqID:144798::TaxID:2
-----------------------------------------------------------------------------------------------------------------------U-CC-UGGCGA-CU-AU-AGC--G-A-U-UUGG-A-ACCAC-CUG-AUA--C--CAUC-UCGAA-CUCAGA-A----GUGAAA-CAUUUC-CGCG-CCA-AUG-AU-AGU-GUGAGG------CUU---CC-UCA--UGCG--AAAGUAGG-UCA--UCGCCAG-GGUUuuauucc--------------------------------------

>Accession:CR628336::SeqID:144799::TaxID:2
-----------------------------------------------------------------------------------------------------------------------U-CC-UGGCGA-CU-AU-AGC--G-A-U-UUGG-A-ACCAC-CUG-AUA--C--CAUC-UCGAA-CUCAGA-A----GUGAAA-CAUUUC-CGCG-CCA-AUG-AU-AGU-GUGAGG------CUU---CC-UCA--UGCG--AAAGUAGG-UCA--UCGCCAG-GGUUuuauucc--------------------------------------

>Accession:CR628337::SeqID:144800::TaxID:2
-----------------------------------------------------------------------------------------------------------------------U-CC-UGGCGA-CU-AU-AGC--G-A-U-UUGG-A-ACCAC-CUG-AUA--C--CAUC-UCGAA-CUCAGA-A----GUGAAA-CAUUUC-CGCG-CCA-AUG-AU-AGU-GUGAGG------CUU---CC-UCA--UGCG--AAAGUAGG-UCA--UCGCCAG-GGUUuuauuuu--------------------------------------

>Accession:CR628337::SeqID:144801::TaxID:2
-----------------------------------------------------------------------------------------------------------------------U-CC-UGGCGA-CU-AU-AGC--G-A-U-UUGG-A-ACCAC-CUG-AUA--C--CAUC-UCGAA-CUCAGA-A----GUGAAA-CAUUUC-CGCG-CCA-AUG-AU-AGU-GUGAGG------CUU---CC-UCA--UGCG--AAAGUAGG-UCA--UCGCCAG-GGUUuuauucc--------------------------------------

>Accession:CR628337::SeqID:144802::TaxID:2
-----------------------------------------------------------------------------------------------------------------------U-CC-UGGCGA-CU-AU-AGC--G-A-U-UUGG-A-ACCAC-CUG-AUA--C--CAUC-UCGAA-CUCAGA-A----GUGAAA-CAUUUC-CGCG-CCA-AUG-AU-AGU-GUGAGG------CUU---CC-UCA--UGCG--AAAGUAGG-UCA--UCGCCAG-GGUUuuauucc--------------------------------------

>Accession:AY883074::SeqID:144827::TaxID:2
-----------------------------------------------------------------------------------------------------------------------U-CC-UGGCGA-CU-AU-AGC--G-A-U-UUGG-A-ACCAC-CUG-AUA--C--CAUC-UCGAAACUCAGA-AA---GUGAA------------------------------------------------------------------------------------------------------------------------------------

>Accession:AY883075::SeqID:144829::TaxID:2
-----------------------------------------------------------------------------------------------------------------------U-CC-UGGCGA-CU-AU-AGC--G-A-U-UUGG-A-ACCAC-CUG-AUA--C--CAUC-UCGAA-CUCAGA-A----GUGAA------------------------------------------------------------------------------------------------------------------------------------

>Accession:AY883076::SeqID:144830::TaxID:2
-----------------------------------------------------------------------------------------------------------------------U-CC-UGGCGA-CU-AU-AGC--G-A-U-UUGG-A-ACCAC-CUG-AUA--C--CAUC-UCGAA-CUCAGA-A----GUGAA------------------------------------------------------------------------------------------------------------------------------------

>Accession:AE017354::SeqID:144833::TaxID:2
-----------------------------------------------------------------------------------------------------------------------U-CC-UGGCGA-CU-AU-AGC--G-A-U-UUGG-A-ACCAC-CUG-AUA--C--CAUC-UCGAA-CUCAGA-A----GUGAAA-CAUUUC-CGCG-CCA-AUG-AU-AGU-GUGAGG------CUU---CC-UCA--UGCG--AAAGUAGG-UCA--UCGCCAG-GGU----------------------------------------------

>Accession:AE017354::SeqID:144834::TaxID:2
-----------------------------------------------------------------------------------------------------------------------U-CC-UGGCGA-CU-AU-AGC--G-A-U-UUGG-A-ACCAC-CUG-AUA--C--CAUC-UCGAA-CUCAGA-A----GUGAAA-CAUUUC-CGCG-CCA-AUG-AU-AGU-GUGAGG------CUU---CC-UCA--UGCG--AAAGUAGG-UCA--UCGCCAG-GGU----------------------------------------------

>Accession:AE017354::SeqID:144835::TaxID:2
-----------------------------------------------------------------------------------------------------------------------U-CC-UGGCGA-CU-AU-AGC--G-A-U-UUGG-A-ACCAC-CUG-AUA--C--CAUC-UCGAA-CUCAGA-A----GUGAAA-CAUUUC-CGCG-CCA-AUG-AU-AGU-GUGAGG------CUU---CC-UCA--UGCG--AAAGUAGG-UCA--UCGCCAG-GGU----------------------------------------------

>Accession:AY883077::SeqID:144842::TaxID:2
-----------------------------------------------------------------------------------------------------------------------U-CC-UGGCGA-CA-AU-AGC--G-G-U-UUGG-A-ACCAC-CUG-AUC--C--CAUC-UCGAA-CUCAGA-A----GUGAA------------------------------------------------------------------------------------------------------------------------------------

>Accession:AY883078::SeqID:144845::TaxID:2
-----------------------------------------------------------------------------------------------------------------------U-CC-UGGCGA-CU-AU-AGC--A-G-U-CUGG-A-ACCAC-CUG-AUC--C--CAUC-UCGAA-CUCAGA-A----GUGAA------------------------------------------------------------------------------------------------------------------------------------

>Accession:AY883079::SeqID:144850::TaxID:2
-----------------------------------------------------------------------------------------------------------------------U-CC-UGGCGA-CC-AU-AGC--G-G-U-UUGG-U-ACCAC-CUG-AUU--C--CAUC-UCGAA-CUCAGA-A----GUGAA------------------------------------------------------------------------------------------------------------------------------------

>Accession:AY883080::SeqID:144856::TaxID:2
-----------------------------------------------------------------------------------------------------------------------U-CC-UGGCGA-CA-AU-AGC--G-G-U-UUGG-A-ACCAC-CUG-AUC--C--CAUC-UCGAA-CUCAGA-A----GUGAA------------------------------------------------------------------------------------------------------------------------------------

>Accession:AY883062::SeqID:144861::TaxID:2
-----------------------------------------------------------------------------------------------------------------------U-CC-UGGCGA-CU-AU-AGC--G-G-U-CUGG-A-ACCAC-CUG-AUC--C--CAUC-UCGAA-CUCAGA-A----GUGAA------------------------------------------------------------------------------------------------------------------------------------

>Accession:AY883081::SeqID:144864::TaxID:2
-----------------------------------------------------------------------------------------------------------------------U-CC-UGGCGA-UU-AU-AGC--C-G-U-GUGG-A-ACCAC-CUG-AUU--C--CAUC-UCGAA-CUCAGA-A----GUGAA------------------------------------------------------------------------------------------------------------------------------------

>Accession:AY883082::SeqID:144870::TaxID:2
-----------------------------------------------------------------------------------------------------------------------U-CC-UGGCGA-CC-AU-AGC--A-U-U-CUGG-A-ACCAC-CUG-AAU--C--CAUC-UCGAA-CUCAGA-A----GUGAA------------------------------------------------------------------------------------------------------------------------------------

>Accession:AY883083::SeqID:144873::TaxID:2
-----------------------------------------------------------------------------------------------------------------------U-CC-UGGCGA-CC-AU-AGC--G-G-C-UUGG-A-ACCAC-CUG-AAU--C--CAUC-UCGAA-CUCAGA-A----GUGAA------------------------------------------------------------------------------------------------------------------------------------

>Accession:AY883084::SeqID:144878::TaxID:2
-----------------------------------------------------------------------------------------------------------------------U-CC-UGGCGA-CC-AU-AGC--G-U-U-UUGG-A-ACCAC-CUG-AUC--C--CAUC-UCGAA-CUCAGC-A----GUGAA------------------------------------------------------------------------------------------------------------------------------------

>Accession:M16169::SeqID:144888::TaxID:2
-----------------------------------------------------------------------------------------------------------------------G-UUUCGGCGG-CC-AU-AGC--G-A-G-AGGG-A-AACGC-CCG-GUU--A--UAUU-CCGAA-CCCGGA-A----GCUAAG-ACUCUC-UGCG-CCG-AUG-GU-ACU-GCAGGG------GGGA--CC-CUG--UGGG--AGAGUAGG-ACA--CCGCCGG-ACU----------------------------------------------

>Accession:M60936::SeqID:144912::TaxID:2
-----------------------------------------------------------------------------------------------------------------------G-UUUCGGCGG-CC-AU-AGC--G-A-G-AGGG-A-AACGC-CCG-GUC--A--CAUU-CCGAA-CCCGGA-A----GCUAAG-ACUCUC-uGCG-CCG-AUG-GU-ACU-GCAGGG------GGGA--CC-CUG--UGGG--AGAGUAGG-ACA--CCGCCGG-ACU----------------------------------------------

>Accession:AE016822::SeqID:144920::TaxID:2
----------------------------------------------------------------------------------------------------------------------GU-UU-CGGCGG-CC-AU-AGC--G-A-G-AGGG-A-AACGC-CCG-GUC--A--CAUU-CCGAA-CCCGGA-A----GCUAAG-ACUCUC-UGCG-CCG-AUG-GU-ACU-GCAGGG------GGGA--CC-CUG--UGGG--AGAGUAGG-ACA--CCGCCGG-ACUUC--------------------------------------------

>Accession:AB001721::SeqID:147687::TaxID:2
----------------------------------------------------------------------------------------------------------------------CC-CC-GGUGAC-UA-U--AGA--G-A-G-AGGG-C-CACAC-CCG-UUC--C--CAUC-CCGAA-CACGGA-A----GUUAAG-CCUCUC-AUCG-CUG-AUG-GU-ACU-AUGUGG------UUCG--CU-GCA--UGGG--AGAGUaGG--AC--GUUGCCG-GGU----------------------------------------------

>Accession:AE016823::SeqID:147724::TaxID:2
-----------------------------------------------------------------------------------------------------------------------C-CC-GGUGAC-UA-U--AGA--G-A-G-AGGG-C-CACAC-CCG-UUC--C--CAUC-CCGAA-CACGGA-A----GUUAAG-CCUCUC-AUCG-CUG-AUG-GU-ACU-AUGUGG------UUCG--CU-GCA--UGGG--AGAGUAGG--AC--GUUGCCG-GGUUUU-------------------------------------------

>Accession:AE017287::SeqID:147725::TaxID:2
-----------------------------------------------------------------------------------------------------------------------C-CC-GGUGAC-UA-U--AGA--G-A-G-AGGG-C-CACAC-CCG-UUC--C--CAUC-CCGAA-CACGGA-A----GUUAAG-CCUCUC-AUCG-CUG-AUG-GU-ACU-AUGUGG------UUCG--CU-GCA--UGGG--AGAGUAGG--AC--GUUGCCG-GGUUUU-------------------------------------------

>Accession:AE010300::SeqID:147741::TaxID:2
-----------------------------------------------------------------------------------------------------------------------C-CC-GGUGAC-UA-U--AGA--G-A-G-AGGG-C-CACAC-CCG-UUC--C--CAUC-CCGAA-CACGGA-A----GUUAAG-CCUCUC-AUCG-CUG-AUG-GU-ACU-AUGUGG------UUCG--CU-GCA--UGGG--AGAGUAGG--AC--GUUGCCG-GGU----------------------------------------------

>Accession:M35569::SeqID:147836::TaxID:2
---------------------------------------------------------------------------------------------------------------------AUG-CC-UGACGA-CC-AU-AGC--G-A-G-GUGG-U-CCCAC-UCC-UUC--C--CAUC-CCGAA-CAGGAC-A----GUGAAA-CGCCUC-AGCG-CCG-AUG-AU-AGU-GCGCA-------UU-----C-GCG--UGUG--AAAGUAGG-UCA--UCGUCAG-GCU----------------------------------------------

>Accession:AJ510154::SeqID:148444::TaxID:2
-------------------------------------------------------------------------------------------------------------------------UG-UCGUAU-UG-AU-AGC--A-U-A-GAGG-A-UACAC-CUG-UAC--C--CAUU-CCGAA-CACAGA-A----GUUAAG-CUCUAU-AGCG-CCA-AAA-GU-AGU-UGGAGG------AUCG--CU-UCC--UGCG--AGGAUAGG-ACG--AUGCG----------------------------------------------------

>Accession:AJ510155::SeqID:148467::TaxID:2
-------------------------------------------------------------------------------------------------------------------------UG-UCGUGU-CG-AU-AGC--A-U-A-GAGG-A-CACAC-CUG-UUC--C--CAUA-CCGAA-CACAGA-A----GUUAAG-CUCUAU-AGCG-CCG-AAA-GU-AGU-UGGAGG------AUCG--CU-UCC--UGCG--AGGAUAGG-ACG--AUGCGAC-A------------------------------------------------

>Accession:AL596164::SeqID:150320::TaxID:2
----------------------------------------------------------------------------------------------------------------------------UGGUAG-UU-AU-GGC--G-A-G-AAGG-U-CACAC-CCG-UUC--C--CAUC-CCGAA-CACGGU-A----GUUAAG-CUUCUC-UGCG-CCA-AUG-GU-AGU-UGGGGG------CUU---CC-CCC--UGCG--AGAGUAGG-UCG--CUGCC----------------------------------------------------

>Accession:AL596164::SeqID:150321::TaxID:2
----------------------------------------------------------------------------------------------------------------------------UGGUAG-UU-AU-GGC--G-A-G-AAGG-U-CACAC-CCG-UUC--C--CAUC-CCGAA-CACGGU-A----GUUAAG-CUUCUC-UGCG-CCA-AUG-GU-AGU-UGGGGG------CUU---CC-CCC--UGCG--AGAGUAGG-UCG--CUGCC----------------------------------------------------

>Accession:AL596170::SeqID:150322::TaxID:2
----------------------------------------------------------------------------------------------------------------------------UGGUAG-UU-AU-GGC--G-A-G-AAGG-U-CACAC-CCG-UUC--C--CAUC-CCGAA-CACGGU-A----GUUAAG-CUUCUC-UGCG-CCA-AUG-GU-AGU-UGGGGG------CUU---CC-CCC--UGCG--AGAGUAGG-UCG--CUGCC----------------------------------------------------

>Accession:AL596170::SeqID:150323::TaxID:2
----------------------------------------------------------------------------------------------------------------------------UGGUAG-UU-AU-GGC--G-A-G-AAGG-U-CACAC-CCG-UUC--C--CAUC-CCGAA-CACGGU-A----GUUAAG-CUUCUC-UGCG-CCA-AUG-GU-AGU-UGGGGG------CUU---CC-CCC--UGCG--AGAGUAGG-UCG--CUGCC----------------------------------------------------

>Accession:AL596172::SeqID:150324::TaxID:2
----------------------------------------------------------------------------------------------------------------------------UGGUAG-UU-AU-GGC--G-A-G-AAGG-U-CACAC-CCG-UUC--C--CAUC-CCGAA-CACGGU-A----GUUAAG-CUUCUC-UGCG-CCA-AUG-GU-AGU-UGGGGG------CUU---CC-CCC--UGCG--AGAGUAGG-UCG--CUGCC----------------------------------------------------

>Accession:AL596173::SeqID:150325::TaxID:2
----------------------------------------------------------------------------------------------------------------------------UGGUAG-UU-AU-GGC--G-A-G-AAGG-U-CACAC-CCG-UUC--C--CAUC-CCGAA-CACGGU-A----GUUAAG-CUUCUC-UGCG-CCA-AUG-GU-AGU-UGGGGG------CUU---CC-CCC--UGCG--AGAGUAGG-UCG--CUGCC----------------------------------------------------

>Accession:AJ249398::SeqID:150326::TaxID:2
-------------------------------------------------------------------------------------------------------------------------UC-UGGUAG-UU-AU-GGC--G-A-G-AAGG-U-CACAC-CCG-UUC--C--CAUC-CCGAA-CACGGU-A----GUUAAG-CUUCUC-UGCG-CCA-AUG-GU-AGU-UGGGGG------CUU---CC-CCC--UGCG--AGAGUAGG-UCG--CUGCCGG-GC-----------------------------------------------

>Accession:Y07639::SeqID:150333::TaxID:2
-------------------------------------------------------------------------------------------------------------------------UC-UGGUAG-UU-AU-GGC--G-A-G-AAGG-U-CACAC-CCG-UUC--C--CAUC-CCGAA-CACGGU-A----GUUAAG-CUUCUC-UGCG-CCA-AUG-GU-AGU-UGGGGG------CUU---CC-CCC--UGCG--AGAGUAGG-UCG--CUGCCGG-GC-----------------------------------------------

>Accession:AL591974::SeqID:150350::TaxID:2
----------------------------------------------------------------------------------------------------------------------------UGGUAG-UU-AU-GGC--G-A-G-AAGG-U-CACAC-CCG-UUC--C--CAUC-CCGAA-CACGGU-A----GUUAAG-CUUCUC-UGCG-CCA-AUG-GU-AGU-UGGGGG------CUU---CC-CCC--UGCG--AGAGUAGG-UCG--CUGCC----------------------------------------------------

>Accession:AL591974::SeqID:150351::TaxID:2
----------------------------------------------------------------------------------------------------------------------------UGGUAG-UU-AU-GGC--G-A-G-AAGG-U-CACAC-CCG-UUC--C--CAUC-CCGAA-CACGGU-A----GUUAAG-CUUCUC-UGCG-CCA-AUG-GU-AGU-UGGGGG------CUU---CC-CCC--UGCG--AGAGUAGG-UCG--CUGCC----------------------------------------------------

>Accession:AL591980::SeqID:150352::TaxID:2
----------------------------------------------------------------------------------------------------------------------------UGGUAG-UU-AU-GGC--G-A-G-AAGG-U-CACAC-CCG-UUC--C--CAUC-CCGAA-CACGGU-A----GUUAAG-CUUCUC-UGCG-CCA-AUG-GU-AGU-UGGGGG------CUU---CC-CCC--UGCG--AGAGUAGG-UCG--CUGCC----------------------------------------------------

>Accession:AL591981::SeqID:150353::TaxID:2
----------------------------------------------------------------------------------------------------------------------------UGGUAG-UU-AU-GGC--G-A-G-AAGG-U-CACAC-CCG-UUC--C--CAUC-CCGAA-CACGGU-A----GUUAAG-CUUCUC-UGCG-CCA-AUG-GU-AGU-UGGGGG------CUU---CC-CCC--UGCG--AGAGUAGG-UCG--CUGCC----------------------------------------------------

>Accession:AL591983::SeqID:150354::TaxID:2
----------------------------------------------------------------------------------------------------------------------------UGGUAG-UU-AU-GGC--G-A-G-AAGG-U-CACAC-CCG-UUC--C--CAUC-CCGAA-CACGGU-A----GUUAAG-CUUCUC-UGCG-CCA-AUG-GU-AGU-UGGGGG------CUU---CC-CCC--UGCG--AGAGUAGG-UCG--CUGCC----------------------------------------------------

>Accession:AL591983::SeqID:150355::TaxID:2
----------------------------------------------------------------------------------------------------------------------------UGGUAG-UU-AU-GGC--G-A-G-AAGG-U-CACAC-CCG-UUC--C--CAUC-CCGAA-CACGGU-A----GUUAAG-CUUCUC-UGCG-CCA-AUG-GU-AGU-UGGGGG------CUU---CC-CCC--UGCG--AGAGUAGG-UCG--CUGCC----------------------------------------------------

>Accession:AE017262::SeqID:150365::TaxID:2
-------------------------------------------------------------------------------------------------------------------------UC-UGGUAG-UU-AU-GGC--G-A-G-AAGG-U-CACAC-CCG-UUC--C--CAUC-CCGAA-CACGGU-A----GUUAAG-CUUCUC-UGCG-CCA-AUG-GU-AGU-UGGGGG------CUU---CC-CCC--UGCG--AGAGUAGG-UCG--CUGCCGG-GC-----------------------------------------------

>Accession:AE017262::SeqID:150366::TaxID:2
-------------------------------------------------------------------------------------------------------------------------UC-UGGUAG-UU-AU-GGC--G-A-G-AAGG-U-CACAC-CCG-UUC--C--CAUC-CCGAA-CACGGU-A----GUUAAG-CUUCUC-UGCG-CCA-AUG-GU-AGU-UGGGGG------CUU---CC-CCC--UGCG--AGAGUAGG-UCG--CUGCCGG-GC-----------------------------------------------

>Accession:AE017262::SeqID:150367::TaxID:2
-------------------------------------------------------------------------------------------------------------------------UC-UGGUAG-UU-AU-GGC--G-A-G-AAGG-U-CACAC-CCG-UUC--C--CAUC-CCGAA-CACGGU-A----GUUAAG-CUUCUC-UGCG-CCA-AUG-GU-AGU-UGGGGG------CUU---CC-CCC--UGCG--AGAGUAGG-UCG--CUGCCGG-GC-----------------------------------------------

>Accession:AE017262::SeqID:150368::TaxID:2
-------------------------------------------------------------------------------------------------------------------------UC-UGGUAG-UU-AU-GGC--G-A-G-AAGG-U-CACAC-CCG-UUC--C--CAUC-CCGAA-CACGGU-A----GUUAAG-CUUCUC-UGCG-CCA-AUG-GU-AGU-UGGGGG------CUU---CC-CCC--UGCG--AGAGUAGG-UCG--CUGCCGG-GC-----------------------------------------------

>Accession:AE017262::SeqID:150369::TaxID:2
-------------------------------------------------------------------------------------------------------------------------UC-UGGUAG-UU-AU-GGC--G-A-G-AAGG-U-CACAC-CCG-UUC--C--CAUC-CCGAA-CACGGU-A----GUUAAG-CUUCUC-UGCG-CCA-AUG-GU-AGU-UGGGGG------CUU---CC-CCC--UGCG--AGAGUAGG-UCG--CUGCCGG-GC-----------------------------------------------

>Accession:AE017262::SeqID:150370::TaxID:2
-------------------------------------------------------------------------------------------------------------------------UC-UGGUAG-UU-AU-GGC--G-A-G-AAGG-U-CACAC-CCG-UUC--C--CAUC-CCGAA-CACGGU-A----GUUAAG-CUUCUC-UGCG-CCA-AUG-GU-AGU-UGGGGG------CUU---CC-CCC--UGCG--AGAGUAGG-UCG--CUGCCGG-GC-----------------------------------------------

>Accession:AE017322::SeqID:150371::TaxID:2
-------------------------------------------------------------------------------------------------------------------------UC-UGGUAG-UU-AU-GGC--G-A-G-AAGG-U-CACAC-CCG-UUC--C--CAUC-CCGAA-CACGGU-A----GUUAAG-CUUCUC-UGCG-CCA-AUG-GU-AGU-UGGGGG-------CUU--CC-CCC--UGCG--AGAGUAGG-UCG--CUGCCGG-GC-----------------------------------------------

>Accession:AE017322::SeqID:150372::TaxID:2
-------------------------------------------------------------------------------------------------------------------------UC-UGGUAG-UU-AU-GGC--G-A-G-AAGG-U-CACAC-CCG-UUC--C--CAUC-CCGAA-CACGGU-A----GUUAAG-CUUCUC-UGCG-CCA-AUG-GU-AGU-UGGGGG-------CUU--CC-CCC--UGCG--AGAGUAGG-UCG--CUGCCGG-GC-----------------------------------------------

>Accession:AE017327::SeqID:150373::TaxID:2
-------------------------------------------------------------------------------------------------------------------------UC-UGGUAG-UU-AU-GGC--G-A-G-AAGG-U-CACAC-CCG-UUC--C--CAUC-CCGAA-CACGGU-A----GUUAAG-CUUCUC-UGCG-CCA-AUG-GU-AGU-UGGGGG-------CUU--CC-CCC--UGCG--AGAGUAGG-UCG--CUGCCGG-GC-----------------------------------------------

>Accession:AE017328::SeqID:150374::TaxID:2
-------------------------------------------------------------------------------------------------------------------------UC-UGGUAG-UU-AU-GGC--G-A-G-AAGG-U-CACAC-CCG-UUC--C--CAUC-CCGAA-CACGGU-A----GUUAAG-CUUCUC-UGCG-CCA-AUG-GU-AGU-UGGGGG-------CUU--CC-CCC--UGCG--AGAGUAGG-UCG--CUGCCGG-GC-----------------------------------------------

>Accession:AE017330::SeqID:150375::TaxID:2
-------------------------------------------------------------------------------------------------------------------------UC-UGGUAG-UU-AU-GGC--G-A-G-AAGG-U-CACAC-CCG-UUC--C--CAUC-CCGAA-CACGGU-A----GUUAAG-CUUCUC-UGCG-CCA-AUG-GU-AGU-UGGGGG-------CUU--CC-CCC--UGCG--AGAGUAGG-UCG--CUGCCGG-GC-----------------------------------------------

>Accession:AE017330::SeqID:150376::TaxID:2
-------------------------------------------------------------------------------------------------------------------------UC-UGGUAG-UU-AU-GGC--G-A-G-AAGG-U-CACAC-CCG-UUC--C--CAUC-CCGAA-CACGGU-A----GUUAAG-CUUCUC-UGCG-CCA-AUG-GU-AGU-UGGGGG-------CUU--CC-CCC--UGCG--AGAGUAGG-UCG--CUGCCGG-GC-----------------------------------------------

>Accession:X00932::SeqID:150427::TaxID:2
----------------------------------------------------------------------------------------------------------------------UG-CC-UGGCGA-CC-AU-AGU--G-U-U-GUGG-A-CCCAC-CUG-AUU--C--CAUG-CCGAA-CUCAGA-A----GUGAAA-CACAAC-AGCG-CCG-AUG-GU-AGU-GUGGGG------UCU---CC-CCA--UGUG--AGAGUAGG-ACA--UCGCCAG-GCAU---------------------------------------------

>Accession:X02251::SeqID:150467::TaxID:2
----------------------------------------------------------------------------------------------------------------------UG-CU-UGGCGA-CC-AU-AGC--G-U-U-GUGG-A-CCCAC-CUG-AUU--C--CAUG-CCGAA-CUCAGA-A----GUGAAA-CGCAAU-AGCG-CCG-AUG-GU-AGU-GUGGGG------UUU---CC-CCA--UGUG--AGAGUAGG-ACA--UCGCCAG-GCAU---------------------------------------------

>Accession:AF086621::SeqID:151272::TaxID:2
-------------------------------------------------------------------------------------------------------------------------CU-UGGUUA-UU-A--AUA--A-A-A-GGGG-A-AACAC-CUG-UUC--C--CAUU-CCGAA-UACAGA-A----GUUAAG-UCCUUU-UACC-UCG-ACA-AU-AGU-UGUUG-------UUUA---C-AUC--CGCA--AAGAUAGA-GUU---AGCCAA-GG-----------------------------------------------

>Accession:AE016827::SeqID:156116::TaxID:2
----------------------------------------------------------------------------------------------------------------------------UGGCAG-CG-AU-AGU--G-C-A-GUGG-A-CCCAC-CUA-AUU--C--CAUG-CCGAA-CUUAGA-A----GUGAAA-CGCUGU-UACG-CCG-AUG-GU-AGU-GUGGGG------CUU---CC-CCA--UGUG--AGAGUAGG-UCA--CUGCCA---------------------------------------------------

>Accession:AE016827::SeqID:156117::TaxID:2
-------------------------------------------------------------------------------------------------------------------------CC-UGGCGG-CG-AU-AGU--G-C-A-GUGG-U-CCCAC-CUG-AAU--C--CAUG-CCGAA-CUCAGA-A----GUGAAA-CGCUGU-UAUG-CCG-AUG-GU-AGU-GUGGGG------UAU---CC-CCA--UGUG--AGAGUAGG-UCA--CCGCCAG-G------------------------------------------------

>Accession:AE016827::SeqID:156118::TaxID:2
-------------------------------------------------------------------------------------------------------------------------CC-UGGCGG-CG-AU-AGU--G-C-A-GUGG-U-CCCAC-CUG-AAU--C--CAUG-CCGAA-CUCAGA-A----GUGAAA-CGCUGU-UAUG-CCG-AUG-GU-AGU-GUGGGG------UAU---CC-CCA--UGUG--AGAGUAGG-UCA--CCGCCAG-G------------------------------------------------

>Accession:AE016827::SeqID:156119::TaxID:2
-------------------------------------------------------------------------------------------------------------------------CC-UGGCGG-CG-AU-AGU--G-C-A-GUGG-U-CCCAC-CUG-AAU--C--CAUG-CCGAA-CUCAGA-A----GUGAAA-CGCUGU-UAUG-CCG-AUG-GU-AGU-GUGGGG------CAU---CC-CCA--UGUG--AGAGUAGG-UCA--CCGCCAG-G------------------------------------------------

>Accession:AE016827::SeqID:156120::TaxID:2
-------------------------------------------------------------------------------------------------------------------------CC-UGGCGG-CG-AU-AGU--G-C-A-GUGG-U-CCCAC-CUG-AAU--C--CAUG-CCGAA-CUCAGA-A----GUGAAA-CGCUGU-UAUG-CCG-AUG-GU-AGU-GUGGGG------UAU---CC-CCA--UGUG--AGAGUAGG-UCA--CCGCCAG-G------------------------------------------------

>Accession:AE016827::SeqID:156121::TaxID:2
-------------------------------------------------------------------------------------------------------------------------CC-UGGCGG-CG-AU-AGU--G-C-A-GUGG-U-CCCAC-CUG-AAU--C--CAUG-CCGAA-CUCAGA-A----GUGAAA-CGCUGU-UAUG-CCG-AUG-GU-AGU-GUGGGG------UAU---CC-CCA--UGUG--AGAGUAGG-UCA--CCGCCAG-G------------------------------------------------

>Accession:AE016827::SeqID:156122::TaxID:2
-------------------------------------------------------------------------------------------------------------------------CC-UGGCGG-CG-AU-AGU--G-C-A-GUGG-U-CCCAC-CUG-AAU--C--CAUG-CCGAA-CUCAGA-A----GUGAAA-CGCUGU-UAUG-CCG-AUG-GU-AGU-GUGGGG------UAU---CC-CCA--UGUG--AGAGUAGG-UCA--CCGCCAG-G------------------------------------------------

>Accession:BA000012::SeqID:162528::TaxID:2
----------------------------------------------------------------------------------------------------------------------GA-CC-UGGUGG-UU-AU-GGC--G-G-A-GCGG-C-UGCAC-CCG-AUC--C--CAUU-CCGAA-CUCGGC-C----GUGAAA-CGCUCC-AGCG-CUG-AUG-GU-ACU-UCGUC-------UCAA---G-ACG--CGGG--AGAGUAGG-UCG--CUGCCAG-GUCU---------------------------------------------

>Accession:BA000012::SeqID:162529::TaxID:2
----------------------------------------------------------------------------------------------------------------------GA-CC-UGGUGG-UU-AU-GGC--G-G-A-GCGG-C-UGCAC-CCG-AUC--C--CAUU-CCGAA-CUCGGC-C----GUGAAA-CGCUCC-AGCG-CUG-AUG-GU-ACU-UCGUC-------UCAA---G-ACG--CGGG--AGAGUAGG-UCG--CUGCCAG-GUCU---------------------------------------------

>Accession:M34770::SeqID:163756::TaxID:2
-------------------------------------------------------------------------------------------------------------------------CC--GGCGG-CC-UG-AGC--G-G-U-GUGC-C-AGAAC-CCG-AUC--C--CAUC-UCGAA-CUCGGC-C----GUUAAA-CACACC-AGCG-CCC-AUG-GU-ACU-GUGCU-------CCAA---G-ACA--CGGG--AGAGUCGG-UCG--CCGCCAG-GCU----------------------------------------------

>Accession:X03902::SeqID:163784::TaxID:2
--------------------------------------------------------------------------------------------------------------------------C-UGGUGG-CC-UG-AGC--G-G-U-GUGC-CCAGAAC-CCG-AUC--C--CAUC-UCGAA-CUCGGC-C----GUUAAA-CACACC-AGCG-CCC-AUG-GU-ACU-GUGUC-------UCAA---G-ACA--CGGG--AGAGUCGG-U-G--CCGCCAG-GCCU---------------------------------------------

>Accession:AE017282::SeqID:164020::TaxID:2
-----------------------------------------------------------------------------------------------------------------------G-CC-UGGCGG-CC-AG-AGC--G-A-G-CGGG-A-ACCAC-CCG-AUC--C--CAUC-CCGAC-CUCGGA-A----GUGAAA-CCGCUU-AGCG-CCG-AUG-AU-AGU-GCAG-------AAUAC-----CUG--UGCG--AAAGUAGG-GAA--CUGCCAG-GCUC---------------------------------------------

>Accession:AE017282::SeqID:164021::TaxID:2
-----------------------------------------------------------------------------------------------------------------------G-CC-UGGCGG-CC-AG-AGC--G-A-G-CGGG-A-ACCAC-CCG-AUC--C--CAUC-CCGAC-CUCGGA-A----GUGAAA-CCGCUU-AGCG-CCG-AUG-AU-AGU-GCAG-------AAUAC-----CUG--UGCG--AAAGUAGG-GAA--CUGCCAG-GCUC---------------------------------------------

>Accession:S39188::SeqID:164110::TaxID:2
----------------------------------------------------------------------------------------------------------------------NG-CC-UGGUGG-CU-UU-AGC--G-A-A-GCGA-U-CAGAC-CCG-AUC--C--CAUC-CCGAA-CUCGGC-C----GUCAAA-CGCUCC-AGCG-CCA-AUG-GU-ACU-AUGUC-------UCAA---G-ACC--UGGG--AGAGUAGG-UCG--UCGCCAG-GCUN---------------------------------------------

>Accession:S39189::SeqID:164112::TaxID:2
----------------------------------------------------------------------------------------------------------------------GG-CA-UGGUGC-CU-UU-AGC--G-A-A-GUGA-U-UAGAC-ACGUAUC--C--CAUC-CUGAA-CUCGGC-C----GUCAAA-CGCUCC-AGCG-CCA-AUG-GU-ACU-AUGUC-------UCAA---G-ACC--UGGG--AGAGUAGG-UCG--UCGCCAG-GCN----------------------------------------------

>Accession:M16170::SeqID:164860::TaxID:2
-----------------------------------------------------------------------------------------------------------------------G-UUUCGGCGG-CC-AU-AGC--G-A-G-AGGG-A-AACGC-CCG-GUU--A--UAUU-CCGAA-CCCGGA-A----GCUAAG-CCUCUC-AGCG-CCG-AUG-GU-ACU-GCAGGG------GGGA--CC-CUG--UGGG--AGAGUAGG-ACA--CCGCCGG-ACU----------------------------------------------

>Accession:K02682::SeqID:165069::TaxID:2
-----------------------------------------------------------------------------------------------------------------------G-UC-UGGCGG-CC-AU-AGC--G-U-G-GGGG-A-AACGC-CCG-GUC--C--CAUC-CCGAA-CCCGGA-A----GCUAAG-CCCCAU-AGCG-CCG-AUG-GU-ACU-GCAACC------GGGA--GG-UUG--UGGG--AGAGUAGG-UCG--CCGCCGG-ACA----------------------------------------------

>Accession:K02683::SeqID:165070::TaxID:2
-----------------------------------------------------------------------------------------------------------------------U-UU-CGGUGG-UC-AU-AGC--G-U-G-GGGG-A-AACGC-CCG-GUC--C--CAUG-CCGAA-CCCGGU-A----GCUAAG-nCCCAC-AGCG-CUG-AUG-GU-ACU-GCACUC------GGUA--GG-GUG--UGGG--AGAGUAAG-UCA--CCGCCGG-AAU----------------------------------------------

>Accession:V00713::SeqID:165071::TaxID:2
-----------------------------------------------------------------------------------------------------------------------G-UUACGGCGG-CU-AU-AGC--G-U-G-GGGG-A-AACGC-CCG-GCC--G--UAUA-UCGAA-CCCGGA-A----GCUAAG-CCCCAU-AGCG-CCG-AUG-GUUACU-GUAACC------GGGA--GG-UUG--UGGG--AGAGUAGG-UCG--CCGCCGU-GA-----------------------------------------------

>Accession:AJ628149::SeqID:165810::TaxID:2
----------------------------------------------------------------------------------------------------------------------GU-UA-CGGCGG-UC-AU-GGC--G-G-A-GGGG-A-AACGC-CCG-GUU--A--CAUU-CCGAA-CCCGGA-A----GCUAAG-CCCUCC-AGCG-CCG-AUG-GU-ACU-GCACUC------GGGA--GG-GUG--UGGG--AGAGUAGG-ACA--CCGCCGG-ACU----------------------------------------------

>Accession:CP000232::SeqID:168550::TaxID:2
-------------------------------------------------------------------------------------------------------------------------UC-UGGUGG-UA-AU-AGC--G-G-A-GGGG-A-AACAC-CCG-UUC--C--CAUC-CCGAA-CACGGC-A----GUUAAG-CCCUCC-AGCG-CCG-AUG-GU-ACU-GGGGA-------GUAU---U-CCC--CGGG--AGAGUAGG-ACA--CCGCCAG-GA-----------------------------------------------

>Accession:X02249::SeqID:168918::TaxID:2
----------------------------------------------------------------------------------------------------------------------UG-UU-UGGUGA-CC-AU-AGU--G-U-U-GUGG-U-ACCAC-CUG-ACU--C--CAUU-CCGAA-CUCAGU-A----GUGAAA-CGUAAU-AACG-CCG-AUG-GU-AGU-GUGGGG------UUU---CC-CCA--UGUG--AGAGUAGG-U-A--UCGCCAG-GCA----------------------------------------------

>Accession:BX248338::SeqID:170553::TaxID:2
-------------------------------------------------------------------------------------------------------------------------UUACGGCGG-CC-AC-AGC--G-G-C-AGGG-A-AACGC-CCG-GUC--C--CAUU-CCGAA-CCCGGA-A----GCUAAG-CCUGCC-AGCG-CCG-AUG-AU-ACU-GCCC--------CUCC-----GGG--UGGA--AAAGUAGG-ACA--CCGCCGA-ACA----------------------------------------------

>Accession:AL583920::SeqID:170801::TaxID:2
-----------------------------------------------------------------------------------------------------------------------G-UUACGGUGG-CC-AC-AGC--G-A-U-AGGG-A-AACGC-CCG-GUC--C--CAUA-CCGAA-CCCGGA-A----GCUAAG-CCUGUC-AGCG-CCG-AUG-AU-ACU-GCCC--------AUUC-----GGG--UGGA--AAAGUAGG-ACA--CUGCCGA-ACA----------------------------------------------

>Accession:NC_002677::SeqID:170802::TaxID:2
-----------------------------------------------------------------------------------------------------------------------G-UUACGGUGG-CC-AC-AGC--G-A-U-AGGG-A-AACGC-CCG-GUC--C--CAUA-CCGAA-CCCGGA-A----GCUAAG-CCUGUC-AGCG-CCG-AUG-AU-ACU-GCCC--------AUUC-----GGG--UGGA--AAAGUAGG-ACA--CUGCCGA-ACA----------------------------------------------

>Accession:X55259::SeqID:170898::TaxID:2
-----------------------------------------------------------------------------------------------------------------------G-UUACGGCGG-UCAAU-AGC--G-G-C-AGGG-A-AACGC-CCG-GUC--C--CAUC-CCGAA-CCCGGA-A----GCUAAG-CCUGCC-AGCG-CCA-AUG-AU-ACU-GCCC-------UCACC-----GGG--UGGA--AAAGUAGG-ACA--CCGCCGA-ACAC---------------------------------------------

>Accession:Y08453::SeqID:170961::TaxID:2
-----------------------------------------------------------------------------------------------------------------------G-UUACGGCGG-UCCAU-AGC--G-G-C-AGGG-A-AACGC-CCG-GUC--C--CAUC-CCGAA-CCCGGA-A----GCUAAG-CCUGCC-AGC--CCG-AUG-AU-ACU-ACCC--------UUCC-----GGG--UGGA--AAAGUAGG-ACA--CCGCCGA-ACA----------------------------------------------

>Accession:X55251::SeqID:170962::TaxID:2
-----------------------------------------------------------------------------------------------------------------------G-UUACGGCGG-UCCAU-AGC--G-G-C-AGGG-A-AACGC-CCG-GUC--C--CAUC-CCGAA-CCCGGA-A----GCUAAG-CCUGCC-AGCG-CCG-AUG-AU-ACU-ACCC--------AUCC-----GGG--UGGA--AAAGUAGG-ACA--CCGCCGA-ACAC---------------------------------------------

>Accession:BX842576::SeqID:171302::TaxID:2
-------------------------------------------------------------------------------------------------------------------------UUACGGCGG-CC-AC-AGC--G-G-C-AGGG-A-AACGC-CCG-GUC--C--CAUU-CCGAA-CCCGGA-A----GCUAAG-CCUGCC-AGCG-CCG-AUG-AU-ACU-GCCC--------CUCC-----GGG--UGGA--AAAGUAGG-ACA--CCGCCGA-ACA----------------------------------------------

>Accession:V00646::SeqID:171449::TaxID:2
--------------------------------------------------------------------------------------------------------------------------U-UGGUGG-U--AU-AGC--A-U-A-GAGG-U-CACAC-CUG-UUC--C--CAUG-CCGAA-CACAGA-A----GUUAAG-CUCUAU-UACG-GUG-AAG-AU-AUU-AC----------UGAU-------G--UGAG--AAAAUAGC-AAG--CUGCCAG-UU-----------------------------------------------

>Accession:CP000123::SeqID:171461::TaxID:2
-------------------------------------------------------------------------------------------------------------------------UC-UGGUGG-UU-AU-AGC--A-U-A-GAGG-U-CACAC-CUG-UUC--C--CAUG-CCGAA-CACAGA-A----GUUAAG-CUCUAU-UACG-GUG-AAG-AU-AUU-AC----------UUAU-------G--UGAG--AAAAUAGC-AAG--CUGCCAG-UU-----------------------------------------------

>Accession:CP000123::SeqID:171462::TaxID:2
-------------------------------------------------------------------------------------------------------------------------UC-UGGUGG-UU-AU-AGC--A-U-A-GAGG-U-CACAC-CUG-UUC--C--CAUG-CCGAA-CACAGA-A----GUUAAG-CUCUAU-UACG-GUG-AAG-AU-AUU-AC----------UUAU-------G--UGAG--AAAAUAGC-AAG--CUGCCAG-UU-----------------------------------------------

>Accession:U01070::SeqID:171528::TaxID:2
-------------------------------------------------------------------------------------------------------------------------CA-AGAGUA-AC-AA-UAG--C-A-A-AAGG-G-AUCAC-CUG-AUA--C--CAUU-CCGAA-CUCAGU-A----GUUAAG-CCUUUU-UACG-CCG-AAA-AU-ACU-A-----------GAAA-------U--AGG---AAAAUAGG-AAG--UUACUCU-U------U-----------------------------------------

>Accession:AE016967::SeqID:171551::TaxID:2
-------------------------------------------------------------------------------------------------------------------------UG-UGAUAU-CG-AU-AUC--G-U-G-AUGG-A-AACAC-CUG-GUC--C--CAUU-CCGAA-CCCAGA-A----GUUAAG-CAUCAU-GGAG-CCA-AAG-GU-AGC-------------GCAA-----------GCA--AGAAUAGG-AAA--AUAUCAC-GCAAAGAAA----------------------------------------

>Accession:AE016968::SeqID:171552::TaxID:2
-------------------------------------------------------------------------------------------------------------------------UG-UGAUAU-CG-AU-AUC--G-U-G-AUGG-A-AACAC-CUG-GUC--C--CAUU-CCGAA-CCCAGA-A----GUUAAG-CAUCAU-GGAG-CCA-AAG-GU-AGC-------------GCAA-----------GCA--AGAAUAGG-AAA--AUAUCAC-GCAAAGAAA----------------------------------------

>Accession:AY374422::SeqID:171563::TaxID:2
-------------------------------------------------------------------------------------------------------------------------------UGC-UA-AU-AUC--G-C-U-GUGG-A-AACAC-CUG-GAA--C--CAUC-CCGAA-CCCAGC-A----GUUAAG-CACAGU-GGAG-CUA-AAU-GU-AG---------------------------------------------------------------------------------------------------------

>Accession:U39694::SeqID:171565::TaxID:2
-------------------------------------------------------------------------------------------------------------------UUUUG-UU-UGGUGC-UA-AU-AUC--G-C-U-GUGG-A-AACAC-CUG-GAA--C--CAUC-CCGAA-CCCAGC-A----GUUAAG-CACAGU-GGAG-CUA-AAU-GU-AGG-UA----------GUAA-------U--ACUG--AGAAUAGG-UAA--GCACCAA-GCAAAA-------------------------------------------

>Accession:L43967::SeqID:171582::TaxID:2
-------------------------------------------------------------------------------------------------------------------------------UGC-UA-AU-AUC--G-C-U-GUGG-A-AACAC-CUG-GAA--C--CAUC-CCGAA-CCCAGC-A----GUUAAG-CACAGU-GGAG-CUA-AAU-GU-AGG-UA----------GUAA-------U--ACUG--AGAAUAGG-UAA--GCACCAA-GC-----------------------------------------------

>Accession:L24488::SeqID:171588::TaxID:2
-----------------------------------------------------------------------------------------------------------------------GACU-UGGUGG-UU-AU-GGC--G-G-A-GUGA-A-UGCAC-CCG-AUC--C--CAUC-CCGAA-CUCGGC-C----GUGAAA-CGCUCC-AGCG-CUG-AUG-GU-ACU-UCGCCU------CA----AG-GCA--CGGG--AGAGUAAG-UCG--CUGCCAG-GUC----U-----------------------------------------

>Accession:AE017332::SeqID:171615::TaxID:2
------------------------------------------------------------------------------------------------------ugguauaauauuaAUUAU-AA-GAGUAA-CA-AU-AGC--A-A-A-AGG--G-AUCAC-CUG-AAU--C--CAUU-CCGAA-CUCAGU-A----GUUAAG-CCUUUU-UACG-CCG-AAG-AU-ACU-A-----------GAAA----------UAGG--AAAAUAGG-GAG--UUACUCU-UUUUuuuuuuuuuuuuuuuuuuuuuuauauauauaaa------------

>Accession:AE017308::SeqID:171647::TaxID:2
-----------------------------------------------------------------------------------------------------------------------A-AC-AAGCAA-CU-AU-AGC----A-A-GAGU-G-UACAC-CUG-AAC--C--CAUU-CCGAA-CUCAGU-A----GUUAAG-CCUCUU-AGCG-UCG-AAG-AU-ACC-A-----------GUAA----------UGGG--AAAAUAGA-GCG--UUGCUUU-U------U-----------------------------------------

>Accession:AE017337::SeqID:171648::TaxID:2
-----------------------------------------------------------------------------------------------------------------------A-AC-AAGCAA-CU-AU-AGC--A-A-G-AGU--G-UACAC-CUG-AAC--C--CAUU-CCGAA-CUCAGU-A----GUUAAG-CCUCUU-AGCG-UCG-AAG-AU-ACC-A-----------GUAA----------UGGG--AAAAUAGA-GCG--UUGCUUU-UU-----------------------------------------------

>Accession:X06099::SeqID:171665::TaxID:2
--------------------------------------------------------------------------------------------------------------------------U-UGGUGG-U--AU-AGC--A-U-A-GAGG-U-CACAC-CUG-UUC--C--CAUG-CCGAA-CACAGA-A----GUUAAG-CUCUAU-UACG-GUG-AAA-AU-AUU-AC----------UUAU-------G--UGAG--AAGAUAGC-AAG--CUGCCAG-U------U-----------------------------------------

>Accession:BX842642::SeqID:171682::TaxID:2
------------------------------------------------------------------------------------------------------------------------AUC-UGGUGG-UU-AU-AGC--A-U-A-GAGG-U-CACAC-CUG-UUC--C--CAUG-CCGAA-CACAGA-A----GUUAAG-CUCUAU-UACG-GUG-AAA-AU-AUU-AC----------UUAU-------G--UGAG--AAGAUAGC-AAG--CUGCCAG-U------UU----------------------------------------

>Accession:BX842643::SeqID:171683::TaxID:2
------------------------------------------------------------------------------------------------------------------------AUC-UGGUGG-UU-AU-AGC--A-U-A-GAGG-U-CACAC-CUG-UUC--C--CAUG-CCGAA-CACAGA-A----GUUAAG-CUCUAU-UACG-GUG-AAA-AU-AUU-AC----------UUAU-------G--UGAG--AAGAUAGC-AAG--CUGCCAG-U------UU----------------------------------------

>Accession:AP004174::SeqID:171701::TaxID:2
----------------------------------------------------------------------------------------------------------------------------CAGUGU-UA-AU-AUU--G-U-A-GUGG-A-AACAC-CUG-UUC--C--CAUC-CCGAA-CACAGA-A----GUUAAG-CACUAU-GAAG-CCA-AAG-GU-AGC-------------UUUU-----------GCA--AGAAUAGG-AAG--AUGCUGC-UUAAAAAGA----------------------------------------

>Accession:BA000026::SeqID:171703::TaxID:2
----------------------------------------------------------------------------------------------------------------------------CAGUGU-UA-AU-AUU--G-U-A-GUGG-A-AACAC-CUG-UUC--C--CAUC-CCGAA-CACAGA-A----GUUAAG-CACUAU-GAAG-CCA-AAG-GU-AGC-------------UUUU-----------GCA--AGAAUAGG-AAG--AUGCUGC-UUAAAAAGA----------------------------------------

>Accession:U00089::SeqID:171716::TaxID:2
-------------------------------------------------------------------------------------------------------------------------UU-UGGUGC-CC-AU-GUC--G-C-U-GUGG-A-AACAC-CUG-GUU--C--CAUU-UCGAA-CCCAGC-A----GUUAAG-CACAGU-GGAG-CCG-AAU-GU-AGC-UG----------UUU--------C--AGUG--AGAAUAGG-AAA--GCACCAA-G------C-----------------------------------------

>Accession:AL445563::SeqID:171723::TaxID:2
--------------------------------------------------------------------------------------------------------------------------A-ACAAGU-GA-CC-AUA--A-C-G-CAAG-U-UAUAC-CUG-AUA--C--CAUU-CCGAA-CUCAGU-A----GUCAAG-ACUUGU-GGUG-CCG-ACG-AU-ACC-C-----------GCU-----------GGGG--AAAAUAGG-GAG--UUGCUUU-U------U-----------------------------------------

>Accession:X05075::SeqID:171733::TaxID:2
--------------------------------------------------------------------------------------------------------------------------C-UGGUGG-UU-AU-AGC--A-U-A-GAGG-U-CACAC-CUG-UUC--C--CAUG-CCGAA-CACAGA-A----GUUAAG-CUCUAU-UACG-GUG-AAG-AU-AUU-AC----------UUAU-------G--UGAG--AAAAUAGC-AAG--CUGCCAG--------U-----------------------------------------

>Accession:AE002365::SeqID:175484::TaxID:2
---------------------------------------------------------------------------------------------------------------------AAG-UU-UGGCGG-CC-AU-AGC--G-A-G-UUGG-U-CCCAC-GCC-UUC--C--CAUC-CCGAA-CAGGAC-C----GUGAAA-CGACUC-AGCG-CCG-AUG-AU-AGU-GUGGU-------UCU----U-CCA--UGCG--AAAGUAGG-UCA--CUGCCAA-AC-----------------------------------------------

>Accession:AE002098::SeqID:175485::TaxID:2
---------------------------------------------------------------------------------------------------------------------AAG-UU-UGGCGG-CC-AU-AGC--G-A-G-UUGG-U-CCCAC-GCC-UUC--C--CAUC-CCGAA-CAGGAC-C----GUGAAA-CGACUC-AGCG-CCG-AUG-AU-AGU-GUGGU-------UCU----U-CCA--UGCG--AAAGUAGG-UCA--CUGCCAA-AC-----------------------------------------------

>Accession:AL162752::SeqID:175488::TaxID:2
----------------------------------------------------------------------------------------------------------------------------UGGCGG-CC-AU-AGC--G-A-G-UUGG-U-CCCAC-GCC-UUC--C--CAUC-CCGAA-CAGGAC-C----GUGAAA-CGACUC-AGCG-CCG-AUG-AU-AGU-GUGG-------UUCUU-----CCA--UGCG--AAAGUAGG-UCA--CUGCCA---------------------------------------------------

>Accession:AL162753::SeqID:175489::TaxID:2
----------------------------------------------------------------------------------------------------------------------------UGGCGG-CC-AU-AGC--G-A-G-UUGG-U-CCCAC-GCC-UUC--C--CAUC-CCGAA-CAGGAC-C----GUGAAA-CGACUC-AGCG-CCG-AUG-AU-AGU-GUGG-------UUCUU-----CCA--UGCG--AAAGUAGG-UCA--CUGCCA---------------------------------------------------

>Accession:AL162757::SeqID:175490::TaxID:2
----------------------------------------------------------------------------------------------------------------------------UGGCGG-CC-AU-AGC--G-A-G-UUGG-U-CCCAC-GCC-UUC--C--CAUC-CCGAA-CAGGAC-C----GUGAAA-CGACUC-AGCG-CCG-AUG-AU-AGU-GUGG-------UUCUU-----CCA--UGCG--AAAGUAGG-UCA--CUGCCA---------------------------------------------------

>Accession:AL162758::SeqID:175491::TaxID:2
----------------------------------------------------------------------------------------------------------------------------UGGCGG-CC-AU-AGC--G-A-G-UUGG-U-CCCAC-GCC-UUC--C--CAUC-CCGAA-CAGGAC-C----GUGAAA-CGACUC-AGCG-CCG-AUG-AU-AGU-GUGG-------UUCUU-----CCA--UGCG--AAAGUAGG-UCA--CUGCCA---------------------------------------------------

>Accession:CP000237::SeqID:176877::TaxID:2
--------------------------------------------------------------------------------------------------------------------------C-UAGUGA-UA-AU-AGC--G-A-A-AGUG-A-AACAC-UCG-ACU--C--CAUU-CCGAA-CUCGAA-A----GUGAAA-CCUUUU-UGCG-CCG-AUG-GU-ACU-GC----------UUGU-------G--UGGG--AGAGUAGG-UGG--UUGCUAG-GUCC---------------------------------------------

>Accession:X06575::SeqID:178395::TaxID:2
---------------------------------------------------------------------------------------------------------------------CGA-CC-UGGUGG-UU-CU-AGC--G-A-G-GAGC-U-UGAAC-CCG-AUC--C--CAUC-CCGAA-CUCGGC-C----GUUAAA-CUCCUC-AGCG-CCA-AUG-GU-ACC-AUGGC-------UUAA---G-CCC--UGGG--AGAGUAGG-UCG--CUGCCAG-G------------------------------------------------

>Accession:CP000115::SeqID:178402::TaxID:2
-------------------------------------------------------------------------------------------------------------------------CC-UGGUGG-UU-CU-AGC--G-A-G-GAGC-U-UGAAC-CCG-AUC--C--CAUC-CCGAA-CUCGGC-C----GUUAAA-CUCCUC-AGCG-CCG-AUG-GU-ACU-AUGGC-------UUAA---G-CCC--UGGG--AGAGUAGG-UCG--CUGCCAG-GC-----------------------------------------------

>Accession:AY690336::SeqID:178412::TaxID:2
------------------------------------------------------------------------------------------------------------------UUUUUG-CC-UGGUGG-CC-AU-AGC--G-A-G-UAGG-C-CCCAC-CCG-AUC--C--CAUU-CCGAA-CUCGGA-A----GUGAAA-CUGCUC-AGCG-CCG-AUG-AU-AGU--------------------------------------------------------------------------------------------------------

>Accession:CP000127::SeqID:178419::TaxID:2
-------------------------------------------------------------------------------------------------------------------------CC-UGGUGG-CC-AU-AGC--G-A-G-UAGG-C-CCCAC-CCG-AUC--C--CAUU-CCGAA-CUCGGA-A----GUGAAA-CUGCUC-AGCG-CCG-AUG-AU-AGU-GUGGG-------GUUA---C-CCA--UGUG--AAAGUAGG-UCA--CUGCCAG-GC-----------------------------------------------

>Accession:CP000127::SeqID:178420::TaxID:2
-------------------------------------------------------------------------------------------------------------------------CC-UGGUGG-CC-AU-AGC--G-A-G-UAGG-C-CCCAC-CCG-AUC--C--CAUU-CCGAA-CUCGGA-A----GUGAAA-CUGCUC-AGCG-CCG-AUG-AU-AGU-GUGGG-------GUUA---C-CCA--UGUG--AAAGUAGG-UCA--CUGCCAG-GC-----------------------------------------------

>Accession:BX321856::SeqID:178438::TaxID:2
---------------------------------------------------------------------------------------------------------------------UUG-CU-UGGCGG-CC-AU-AGC--G-C-U-UUGG-A-CCCAC-CUU-UUC--C--CAUC-CCGAA-CAGAGA-A----GUGAAA-CGAAGC-AGCG-CCG-AUG-AU-AGU-GUGU--------UUCC-----ACA--UGUG--AAAGUAGG-UCA--CCGCCAG-GCUU---------------------------------------------

>Accession:CP000103::SeqID:178503::TaxID:2
---------------------------------------------------------------------------------------------------------------------ACG-CU-UGGUGG-UC-AU-AGC--A-C-U-UUGG-A-CCCAC-CCC-UUC--C--CAUC-CCGAA-CAGGGU-C----GUGAAA-CGAAGU-CGCG-CCG-AUG-AU-AGU-GUGU--------UUUC-----ACA--UGCG--AAAGUAGG-UCA--CUGCCAG-GCAC---------------------------------------------

>Accession:X55261::SeqID:178681::TaxID:2
----------------------------------------------------------------------------------------------------------------------GU-UA-CGGCGG-UU-AU-AGC--G-G-U-GGGG-A-AACGC-CCG-GUC--C--CAUU-CCGAA-CCCGGA-A----GCUAAG-GCCACC-UGCG-CCG-AUG-GU-ACU-GCACUC------GACA--GG-GUG--UGGG--AGAGUAGG-ACA--CCGCCGG-AACA---------------------------------------------

>Accession:AP006618::SeqID:178773::TaxID:2
-----------------------------------------------------------------------------------------------------------------------U-UA-CGGCGG-UC-AU-AGC--G-G-U-GGGG-A-AACGC-CCG-GUC--C--CAUU-CCGAA-CCCGGA-A----GCUAAG-CCUGCC-AGCG-CCG-AUG-GU-ACU-GCACUC------GACA--GG-GUG--UGGG--AGAGUAGG-ACA--CCGCCGG-AACAUCC------------------------------------------

>Accession:AP006618::SeqID:178774::TaxID:2
-----------------------------------------------------------------------------------------------------------------------U-UA-CGGCGG-UC-AU-AGC--G-G-U-GGGG-A-AACGC-CCG-GUC--C--CAUU-CCGAA-CCCGGA-A----GCUAAG-CCUGCC-AGCG-CCG-AUG-GU-ACU-GCACUC------GACA--GG-GUG--UGGG--AGAGUAGG-ACA--CCGCCGG-AACAUCC------------------------------------------

>Accession:AP006618::SeqID:178775::TaxID:2
-----------------------------------------------------------------------------------------------------------------------U-UA-CGGCGG-UC-AU-AGC--G-G-U-GGGG-A-AACGC-CCG-GUC--C--CAUU-CCGAA-CCCGGA-A----GCUAAG-CCUGCC-AGCG-CCG-AUG-GU-ACU-GCACUC------GACA--GG-GUG--UGGG--AGAGUAGG-ACA--CCGCCGG-AACAUCC------------------------------------------

>Accession:X55260::SeqID:179033::TaxID:2
----------------------------------------------------------------------------------------------------------------------GU-UA-CGGCGG-CC-AU-AGC--G-A-A-GGGG-A-AAUAC-CCG-GUC--C--CAUC-CCGAA-CCCGGA-A----GUCAAG-CCCUUC-AGCG-CCG-AUG-GU-ACU-GCAACC------GAGA--GG-CUG--UGGG--AGAGUAGG-ACG--CCGCCGG-ACA----------------------------------------------

>Accession:AP003587::SeqID:179925::TaxID:2
-----------------------------------------------------------------------------------------------------------------------U-CC-UGGUGC-CU-AU-GGU--G-C-A-GUGG-U-ACCACUCUG-ACC--C--CAUC-CCGAA-CUCAGA-G----GUGAAA-CGCUGC-UAUG-GCU-ACG-AU-AGU-CUAGGG------GUUG--CC-CUA--UGCC--ACAAUCGC-UCG--GUGCCAG-GU-----------------------------------------------

>Accession:AP003588::SeqID:179926::TaxID:2
-----------------------------------------------------------------------------------------------------------------------U-CC-UGGUGC-CU-AU-GGU--G-C-A-GUGG-U-ACCACUCUG-ACC--C--CAUC-CCGAA-CUCAGA-G----GUGAAA-CGCUGC-UAUG-GCU-ACG-AU-AGU-CUAGGG------GUUG--CC-CUA--UGCC--ACAAUCGC-UCG--GUGCCAG-GU-----------------------------------------------

>Accession:AP003595::SeqID:179927::TaxID:2
-----------------------------------------------------------------------------------------------------------------------U-CC-UGGUGC-CU-AU-GGU--G-C-A-GUGG-U-ACCACUCUG-ACC--C--CAUC-CCGAA-CUCAGA-G----GUGAAA-CGCUGC-UAUG-GCU-ACG-AU-AGU-CUAGGG------GUUG--CC-CUA--UGCC--ACAAUCGC-UCG--GUGCCAG-GU-----------------------------------------------

>Accession:AP003598::SeqID:179928::TaxID:2
-----------------------------------------------------------------------------------------------------------------------U-CC-UGGUGC-CU-AU-GGU--G-C-A-GUGG-U-ACCACUCUG-ACC--C--CAUC-CCGAA-CUCAGA-G----GUGAAA-CGCUGC-UAUG-GCU-ACG-AU-AGU-CUAGGG------GUUG--CC-CUA--UGCC--ACAAUCGC-UCG--GUGCCAG-GU-----------------------------------------------

>Accession:BA000019::SeqID:179930::TaxID:2
-----------------------------------------------------------------------------------------------------------------------U-CC-UGGUGC-CU-AU-GGU--G-C-A-GUGG-U-ACCACUCUG-ACC--C--CAUC-CCGAA-CUCAGA-G----GUGAAA-CGCUGC-UAUG-GCU-ACG-AU-AGU-CUAGGG------GUUG--CC-CUA--UGCC--ACAAUCGC-UCG--GUGCCAG-GU-----------------------------------------------

>Accession:BA000019::SeqID:179931::TaxID:2
-----------------------------------------------------------------------------------------------------------------------U-CC-UGGUGC-CU-AU-GGU--G-C-A-GUGG-U-ACCACUCUG-ACC--C--CAUC-CCGAA-CUCAGA-G----GUGAAA-CGCUGC-UAUG-GCU-ACG-AU-AGU-CUAGGG------GUUG--CC-CUA--UGCC--ACAAUCGC-UCG--GUGCCAG-GU-----------------------------------------------

>Accession:BA000019::SeqID:179932::TaxID:2
-----------------------------------------------------------------------------------------------------------------------U-CC-UGGUGC-CU-AU-GGU--G-C-A-GUGG-U-ACCACUCUG-ACC--C--CAUC-CCGAA-CUCAGA-G----GUGAAA-CGCUGC-UAUG-GCU-ACG-AU-AGU-CUAGGG------GUUG--CC-CUA--UGCC--ACAAUCGC-UCG--GUGCCAG-GU-----------------------------------------------

>Accession:BA000019::SeqID:179933::TaxID:2
-----------------------------------------------------------------------------------------------------------------------U-CC-UGGUGC-CU-AU-GGU--G-C-A-GUGG-U-ACCACUCUG-ACC--C--CAUC-CCGAA-CUCAGA-G----GUGAAA-CGCUGC-UAUG-GCU-ACG-AU-AGU-CUAGGG------GUUG--CC-CUA--UGCC--ACAAUCGC-UCG--GUGCCAG-GU-----------------------------------------------

>Accession:CP000248::SeqID:180246::TaxID:2
-------------------------------------------------------------------------------------------------------------------------CC-UGGUGG-CC-AU-AGC--G-U-C-CGUG-C-CCCAC-CCG-AUC--C--CAUC-UCGAA-CUCGGC-C----GUGAAA-CCGGAC-AGCG-CCA-AUG-GU-ACU-AACGC-------UCAA---G-CGU--UGGA--AGAGUAGG-UCG--UCGCCAG-GC-----------------------------------------------

>Accession:CP000248::SeqID:180247::TaxID:2
-------------------------------------------------------------------------------------------------------------------------CC-UGGUGG-CC-AU-AGC--G-U-C-CGUG-C-CCCAC-CCG-AUC--C--CAUC-UCGAA-CUCGGC-C----GUGAAA-CCGGAC-AGCG-CCA-AUG-GU-ACU-AACGC-------UCAA---G-CGU--UGGA--AGAGUAGG-UCG--UCGCCAG-GC-----------------------------------------------

>Accession:CP000248::SeqID:180248::TaxID:2
[truncated: 387,820 more chars]
