# Supplementary material for: Structural Constraints Identified with Covariation Analysis in Ribosomal RNA
Source: PLoS One. 2012 Jun 19;7(6):e39383. doi: 10.1371/journal.pone.0039383 (PMC3378556; doi:10.1371/journal.pone.0039383)
Supplement: Dataset S3 — The bacterial 23S rRNA sequence alignment. (FASTA) [file pone.0039383.s017.fasta]

>Accession:U18089::SeqID:2806::TaxID:2
-------------------------------------------------------------------------------------------------------------------------------------------------------------------------------------------GGUC-AAGU-G-AA----UAA-GGG-CAUA-CG-GUG-GAUG--CCU-UG-GC-AG-AGAC-A-GGC-GAUGAAG-GA--C-GU-GGAUA--CC-U-GC-G-AAAA-GCC-U-CGGG--GAGCU-G-GUAAGCA----AGC-UU-UG-AUC-CGGGG-AUA-UC-CGAAUGGGGCAA-CCC--a-gc-caga-------------------------------------------------------------------------------------------------------------------------------------------------------------------------------------------------------------------------------------------guga-----------uc-ug-guu-AUUG-C-ACAC--U-----------------------------------------------------------------------------------------------------------------------------------------------------------------------------------------------------------------------------------------------GA-AUA-CA--UA----GGU-GU-G----U-A--A-AG-C-CAACGC-GGU-G-AACUGAAACAUCU-CA-GUA-GCUGCAG-GAAAAGA-AA-UC-A-A--CC------GA-GAUUCC-CG-UAG-UAGC-GGCG-AGCGA-ACC-GGGA-GCA-GCCuu-c-a------------------------------------------------------------------------------------------------------------------------------------------------------------------------------------------------------------------------------------------------ugaug--------------------------------------------uagcg--ua-agacuu--aG-GA-GAAC-G-A-C-C-U-GGGA-A-G-GUUG-GCCGUAG-UGG--UGAUAGCCCCGU-A-UC--gaa-aagacu-uu--cguggaacuag---gcau--ga-----------------------------------------------------------------------------GCA--AAGUA-GGG-C-GGGA--CAC-GUG-GAAUCCU-GU-C-U-GAAGAU--GGG-GGGACCAU--CC-UCC-AAGG-CUAA----AUA-CUCG-UCUCUGACC-GAUAGUG-AACC-AGUA-CCGUGAaGG-CA-AAGGCGAAAA-GAACCGC-GGAGA-G-GCA--GUGAAA-UAGAUCCUGAAA-CCGU--AUGCCUACAA-G-C-AGUG-GGA-GC-CC----G----------------------------------------------------------------------------------------------------------------------------------------------------------------------------------------------------------------------------------------------------------------------------------------------------------------------------------------------------------------------------------------------------------------------------------------------------------------------------------------------------------------------------------------------------------------uuuu-a-----------------------------------------------C-GG--G-UGAC-UGCGUACCU-U-UUG-UAUCAUGGGUCAGCGACUU-AC-U-UUUCUGU-GGC----GAGCUUAA-CC-------GAAGUA---GGuGA-AGCCGUA--GGGAAA-CCGAG-UCU-GAA---UAGGGCAC----------------------------------------------------------------------------------------------------------------------------------------------------------------------------------------------------------------------------------------------------------------------------------------------------------------------------------------------------a-uG-UCGCAGG-GAGUA-GACCC--AAAC-C--G-ACGA-UCUAUCCAUGG-UCAG-AUGAA-GGU-GGG-UA-AAAC-CUACU-GGA-GGUCCGAACCcCAC-GC-CC-cGUUG-AAAAgguc--GGG-AU-AA-CUGUG-AUA-G-GAGU--GAAAGGCU-AAACAAGU-CC-G-AG-AUAGC-UGGUUCU-CCCCG--AAAG-CUAU-UGAG-GUAGGCC-GUCGCG-ua-------U-UA-C--CU-GC-CGGGGUAG-AGC-ACU-GU-UACGG-C-UA----G-GGGCU--GUCACGGCUUAGGAA-CCCGUU-GCAAACUCCGAA-UAcCGG-C-A-G---uag----AG--CG-C-GGCAGACAGUCUCGGCGGGUGCUAAGCUCCGU--CGUC-AAGA-GGGAUGAAAACCCCAGACCGCCAGCUAAG-GU-CCCC-AAA-U-AUGG-C-UCA-GU---------GGAAACGAUGUG-G-A-AGGCCCA--GACA-G-CUAGG-AGG-UUGGCUUAGAAGCAGCCAU--CCUUUAAAGAAAGC-GUAA-UA--------G-CUCAC-UAGU-------CGA------G-U-CGG-CC--CG-CGCGG--AAGAU-UUAA-C-GGGG--CU--CAAGCC-AUA-U--ACC-GAA-G-CUGC-GGgu--gu-gucc---------uuag-------------------------------------------------------------------------------------------------------------------------------------------------------------------------------------------------------------------------------------------------------------------------------------------------------------------------------------------------------------------------------------------------------------------------------------------------------------------gga-c-ac--gc-GG-UAGG--GGA-G-----CGUU-CG-G-UAA-------------------------------------------------------------------------------------------------------------------------G-C-CGA-U--AA-GG-UG-U-G-UU--GUGA----G-GC--A-UG-CUGGAG-GU-AU-CC-GAA-GUGC-GAA-UG--UGA--CAUG-AGUA--GCG--AUAA-A-GGG-UGUGA-AAA-CCACC-CU---CGCC-GUA-AGC-C-CA-----------------------------------------------------AGG-UU--CCU-G-CG-CA-AG-UCA-AU-C--UG--CGCAGGGU--GAGU-CGGC-C-CCUAAGGCGAG--GC-C-----GAGA---G-G-C-GU-AGCUG--AUGG-GAAA-UCG-G--UU-AAUAUUC-CGAUAC-ug-u--ua-caa-gau-----------------------------------------------------------------------------------------------------------------------------gcgau------g-gag--uga-cggag--aaaggua--gcuc-a---g-cc-gg-g-----ug--u--uggau-gu----------------------------------------------------------------------------------------------------------------c--u-gggu--uuag-----------------gcgu-u--aggga----------------------------------------------gucu-cuca-gg-ca-aa---u--cg--g--gaaggcca------------------------------------------------------------------------------------------------------------------------------------------------uuc--ga--ggcgug-auga-c-ga----------------------------------------------------ucc-uc---uac--g-----gagga------------------------------------g-aag----ugagu---gaacu--acg--c-uu-cc-aggaaa-agcuuc--uaagcucua-----------------------------------------------------------------------------------------------------------------gu-c-uug-ug---au----gAC-CGUA-CCCCAAACCGACACAGGUGG-GCAGGA-A-GAAUA-UUCCAA-GGCGCUUGAG-AGAC-CUCGGGUG---------------AAGGAA-CUCGG-CA----------AAUUGAC-ACC-GUAAC--UUCG-GA-AG-AAGGUGU-G-CCCUgaua-ggu-u-g--------ua-cucc---cuugc---ggag-----------aaggcc-g-aagggg-UCGC-AGAGA--UCGGUG-GC-UGCAACU-GUUUAACAAAAACACAGG-C-UCUGCAAAGACGAA-A------GUC-GA-C-GUAU-AGGGUCUGA-CGCCUGCCCGGU-GCCG-GAAGG-UUAAGUGAGGG-GGU------------G-CAA----------------------GCUCUUGAUCGAAG-CCCCGGUAAAC-GGC-GGCC-GUAACUAUAACGGU-CCUAAGGUAGCG-AAAUU-CCUU-GUC-GGGUAAGUUCCGACCUGCACGAA-UGGC-GUAAUGA-UGGCCAC-ACUG-UCU-CCAC-CCGAGACUCAGCGAA-GUU-GAAGU-CG-CUGUG--AA-GAU-A-CAGCGUUCCCGUGGC-AAGACGGAAAGACCCCGUGCACCUU-UACUACAACUUAGCAUGGGACCUUG-AGAUGAUUU-GUGUAGGAUAGGUGG-GAGGCUGU-GAA-A------CCG-GGACGCUAGUUCUGGU-GGAGCCAGUCC-UUGAAAUACCACCCU----GG-UGAUCUU-GGGG-UUCUAA-CCU-CG-G----UCCG---UGAUCCGGAUC-AGG-GACAGUGUUUGGUGGG-UAGU-UUGAC-U-GGGGCGGUCUCC-U-CCCAA-AGAGUA-ACGGAGGAGCACGAAG-GUACCCUCAGCGCGGUCGGAAAUCGCGC-AGU---GAGUGCAAAGGCACAA-GG-GUGCUUGACUGCGAGACAGACAAGUCGAGCAGGUGCGAAAGC-AGG-UCUUAGUGAUC-CGGUGGUU-CU-G-UAUGGAAGGGCCAUCGCUCAAC-GGAUAAAAGGUA-CGC-CGGG-G-AU-AACAG-GCUGA--UUCCCCCCAAG-A-G-UUC-ACA-UCGACGGGG-GA-GU-UUGGCACCU-CGAUGUCGGCUCAUCGCAUCCUGGGGCUGUAGC---CuGGUC-CC-AAGGGU-AU-GGCU-GUU-CGC--CAUUUA-AAGCGGU-AC-G-CGA-CCUGGGUUCA-GAACGU--GUGA-GACAGUU-CGG-U-CCCU-AU-CUGCCAUGGG-CG-UUGGAGAUUU-GA-A-GGAAGC-UGC--------------UCCUAGUACGAGA-GGACC-GGAGUGGA-CGUACU---CUGGUGU--UCCGGUUGUUCU-GC-CA-AGGGCA-U-UGC-CGGGUA-GCU-AUGU-A-CGGUCGGGAUAACCGCUGAAAGCAUCUAAGC-GGAAG-CCA--UCCUAAG-AUGA-GAUCUCCC---GGGC-------------auaa--------------------------------------------------------------------------------------------------------GCCC-C-CUG-AAGG-GA-CGUGGAAGACU-ACCACGUU-GAU-GGCU-CC--UGUG-GAAGCGCA--GCAA---UGCGU-GC-AGCUA-A-GGAGUACUAAUC-GGCCG-UGCG-GCUUGA-CC-AU---------------------------------------------------------------------------------------------------------------------------------------------------
>Accession:AM180893::SeqID:2904::TaxID:2
-------------------------------------------------------------------------------------------------------------------------------------------------------------------------------------uucuauGGUC-AAGC-U-AC----UAA-GGG-CGCA-CG-GUG-GAUG--CCU-UG-GC-AG-AAUC-A-GGC-GAUGAAG-GA--C-GU-GGCAA--GC-U-GC-G-AUAA-GCU-U-CGGG--GAGCC-G-CA-CACA----GGC-GU-UA-UAU-CGAAG-AUC-UC-CGAAUGGGGAAA-CCC--A-CA-UGAG------------------------------------------------------------------------------------------------------------------------------------------------------------------------------------------------------------------------------------------caaac-----------CU-CA-UGU-ACGG-C-CCGC--U-----------------------------------------------------------------------------------------------------------------------------------------------------------------------------------------------------------------------------------------------GA-AUA-CA--UA----GGCGGG-C----A-C--G-AG-C-GAACCC-AGG-G-AAGUGAACCAUCU-CA-GUA-CCUGGAG-GAAAAGA-AA-GA-A-A--CC------UC-GAUUCC-GA-AAG-UAGU-GGCG-AGCGA-AAU-CGGA-ACA-GCCCA-a-a-cccgug-auau------------uucg----------------guauugcggg-gguugu--agggucugcaacaguagaguuaccaauccucu---------------------------------------------------------------------------------------------------------------------------------------------------ggu-----------------------------------------u--------------------aG-UC-GAAU-C-C-G-U-U-GGAA-A-G-CGGA-UCCAUAG-AGCG-UGACAGACGCGU-A-GGC-gaa-aaccau-ga--gg-acucgaagcagauaccu------------------------------------------------------------------------------------GAGUA-AGG-C-GGGG--CAC-GUG-AAACCCU-GC-U-U-GAAUCC--GCG-GAGACCAU--UC-CGC-AAGG-CUAA----AUA-CUCG-AUUCUGACC-GAUAGUG-AACC-AGUA-CCGUGA-GG-GA-AAGGUGAAAA-GCACCCC-ugcga-GGGGA--GUGAAA-GAGUACCUGAAA-CCGU--GUGCCUACAA-G-C-AGUG-GGA-GG-AC---------------------------------------------------------------------------------------------------------------------------------------------------------------------------------------------------------------------------------------------------------------------------------------------------------------------------------------------------------------------------------------------------------------------------------------------------------------------------------------------------------------------------------------------uaugccc-------gcaa-------gggaau------------------------------------------------GU--C-UGAC-CGCGUGCCU-A-UUG-CAUAAUGAGCCGGCUAGUU-AU-U-CUU-GUC-AGC----AAGGUUAA-GC---------GUAA---GC-GG-AGCCGAA--GCGAAA-GCGAG-UCU-GAA---UAGGGCGU----------------------------------------------------------------------------------------------------------------------------------------------------------------------------------------------------------------------------------------------------------------------------------------------------------------------------------------------------uaaG-UUGGCAG-GAAUA-GACGCG-AAGC-G-GG-AUGA-UCUACCCUUGG-CCAGGUUGAA-GAU-GGGGUA-ACAC-CCAUU-GGA-GGACCGAACC-GGU-GU-UU--GUUG-AAAAAAGC-UCGG-AUGAG-CUGAGGGUA-G-GGGU--GAAAGGCU-AAUCAAAU-UCCG-UG-AUAGC-UCGUUCU-CUCCG--AAAU-AGCU-UUAG-GGCUAGC-CUCGGA-UG-------a-uu-ug-CA-GU-GGUGGUAG-AGA-UCU-GG-AUGGA-C-UA---GG-GGGCU--uucc-GGCUUACUGA-AUCCAA-CCAAACUUCGAA-UG-CCA-C-U-G--acaac---ca-GUC-C-GGGAGUCAGAC--UGUGGGGGCUAAGCUUCAC--AGUC-GAGA-GGG-AAACAG-CCCAGACCGCCUGCUAAG-GU-CCCC-AAGUU-ACAG-U-UAA-GUG--------GGAAAGGAAGUC-GGA-ACGCUCA--GACA-G-CCAGG-AGG-UUGGCUUAGAAGCAGCCAU--CCUUUAAAGAAAGC-GUAA-UA--------G-CUCAC-UGGU-------CAA------G-C-GGU-CC--GG-UGCCG--ACAAU-ACAA-C-GGGG--CU--AAAACU-GUA-C--ACC-GAA-G-CAGC-GGAU--GC-ACACC--------uau-------------------------------------------------------------------------------------------------------------------------------------------------------------------------------------------------------------------------------------------------------------------------------------------------------------------------------------------------------------------------------------------------------------------------------------------------------------------GGUG-U-GC--GU-GG-UAGG--AGA-G-----CAUU-cu-c-aac-------------------------------------------------------------------------------------------------------------------------A-G-CGU-U-GAA-GU-CA-G-A-CC--GAGA----G-GA--U-UG-AUGGAG-CG-UU-GC-GAA-GAGA-CCC-UGC-CGG--CAUA-AGUA--GCG--AUAA-U-GAA-UGUGA-GAA-CCAUU-CA---CGCC-GAA-AGU-C-UA-----------------------------------------------------AGG-UUU-CCU-G-AG-GAAGG-UUA-AU-C--CG--CUCAGGGU--CAGG-CGGU-C-CCUAAGGCGAG--GC-C-----GAAA---G-G-C-GU-AGCUG--AUGG-ACAU-CCG-G--UU-AAUAUUC-CGGACC-uc-c--ca-acu-cucguuugacgau------------------------------------------------------------------------------------------------------------------------------g-ggg--aga-cgcag--aaggaua--ggca-g---g-uc-gu-c-----au--a--ugg-c-ua----u-----------------------------------------------------------------------------------------------------------g--g-cggucgauacgcguaagcuggugccgggaggcaa----------------------------------------------------aucc-cccc-ggug-------------------cuuaacagugaggc----------------------------------------------------------------------------------------------------------------------------------------------------------------------------------------------------------------guaaagcaagcccguaug--------------gugua--------------------------------ag----cugcc--ga-guu--cacg-c-ug-cc-gagaaa-auccucuaa--ggag-----------------------------------------------------------------------------------------------------------------------aguaguu---gg----aAC-CGUA-CCCCAAACCGACACAGGUAG-ACGAGG-A-GAAUA-UCCAAA-GGCGCUCGAG-UGAA-AGCUUGUU---------------AAGGAA-CUCGG-CA----------AAUUAGA-CCC-GUAAC--UUCG-GG-AG-AAGGGUC-G-CCCACC----------------------------ucu-----------------------------GGUGGG-CCGC-AGUGA-AACGCGU-AC-GGCGACU-GUUUAACAAAAACACAGGUC-UCUGCAAAGUCGAA--------AAC-GA-C-GUAU-AGGGGCUGA-CUCCUGCCCGGU-GCUG-GAAGG-UUAAAAGGAGA-GGUUA-GCC------G-CAA---------------GGCGA-AGCUUUGAAUUGAAG-CCCCAGUGAAC-GGC-GGCC-GUAACUAUAACGGU-CCUAAGGUAGCG-AAAUU-CCUU-GUC-GGGUAAGUUCCGACCUGCACGAA-UGGA-GUAACGA-UCGUACG-ACUG-UCU-UAAC-GAGUUGCUCGGCGAA-CUU-GUAGU-AC-CGGUG--AA-GAU-G-CCGGUUACCCGCAGC-UAGACGGAAAGACCCCGUGCACCUU-UACUACACCUUUACUAUGAAUUAUG-ACUCUUACU-GCGCAGGAUAGGUGG-GAGGCUUU-GAU-A------CCA-GGCUCUUGGGCUUGGU-GGAGCCACC-G-GUGAGAUACCACCCU----GU-GAGCGUU-GUGA-UUCUAA-CCU-GC-U----CCCG---UGAUCCGGGAG-AGG-GACAUAGUAAGGCGGG-UAGU-UUGAC-U-GGGGCGGUCGCC-U-CCUAA-AUUGUA-ACGGAGGCGCGCGAAC-GUACUCUCAGACUGUUUGGAAAUCAGUC-GUC---GAGUGCAAAGGCAUAA-GA-GUGGUUAACUGUGAGACCUACAAGUCGAGCAGAUGCGAAAGC-AGG-CCUUAGUGAUC-CGGUGGUU-CU-G-UAUGGAAGGGCCAUCGCUCAAC-GGAUAAAAGGUA-CGC-CGGG-G-AU-AACAG-GCUGA--UCGGAGCCAAG-A-G-UUC-AUA-UCGACGCUC-CG-GU-UUGGCACCU-CGAUGUCGGCUCAUCGCAUCCUGGAGCUGUAGA---A-GGUU-CC-AAGGGU-UA-GGCU-GUU-CGC--CUAUUAAAAGCGGU-AC-G-UGA-GCUGGGUUGA-GAACGU-CGCGA-GACAGUU-CGG-U-CCCU-AU-CUGCUGUGGG-CG-UAGGAGAUUU-GA-G-GAGGGC-UGU--------------CCUUAGUACGAGA-GGACC-GGGAUGGA-CGAACCU--CUUGUGU--UCCAGUUGUCAU-GC-CA-AUGGCA-C--GC-UGGGUA-GCG-AAGU-U-CGGUUGUGAUAACCGCUGAAUGCAUAUAAGC-GGGAAGCACG-CUCCAAG-AUGA-GAUCUCCCU------------------gaagg-------------------------------------------------------------------------------------------g----------------------------CC-CCAGGAAGACC-ACCUGGUU-GAUAGGCU-GG-AGGUG-UAAGCACA--GUAA---UGUGU-UC-AGCUU-A-CCAGUACUAAUC-GCCCGUU-CG-GCUUGU-CC-AUAGAA-----------------------------------------------------------------------------------------------------------------------------------------------
>Accession:DQ084453::SeqID:3102::TaxID:2
--------------------------------------------------------------------------------------------------------------------------------------------------------------------uaacgacuguuug-ggguuguauAGUC-AAGU-A-AU----UAA-GUG-CAUG-UG-GUG-GAUG--CCU-UG-GC-AG-UCAG-A-GGC-GAUGAAA-GA--C-GU-GAUAG--CC-U-GC-G-AAAA-GCU-C-CGGG--GAGGC-G-GCAAAUA----UCC--U-UUGAUC-CGGAG-AUU-UC-UGAAUGGGGGAA-CCC--A-CC-UACU-------------------------------------------------------------------------------------------------------------------------------------------------------------------------------------------------------------------------------------------UUAA-----------GG-UA-GGU-AUUG-C-AACA--U-----------------------------------------------------------------------------------------------------------------------------------------------------------------------------------------------------------------------------------------------GA-AUA-CA--UA----GUG-UU-G----C-A--A-GG-C-GAACGA-GGG-G-AAGUGAAACAUCU-CA-GUA-CCCUUAG-GAAAAGA-AA-UC-A-A--UU------GA-GAUUCC-CU-CAG-UAGC-GGCG-AGCGA-ACG-GGGA-UCA-GCCC--------------------------------------------------------------------------------------------------------------------------------------------------------------------------------------------------------------------------------------------------au-ua---------------------------------------------aguuaug--ug-uguuuu--aG-UG-GAAc-g-c-u-c-u-ggga-a-g-ugcg-AACGUAG-AGGG-UGAUAUUCCCGU-A-CAC-gaa-agggca-ca--cauaa-----u---gaug--ac----------------------------------------------------------------------------------GAGUA-GGG-C-GAGG--CAC-GUG-AAACCUU-GU-C-U-GAAUAU--GGG-GGGACCAU--CC-UCC-AAGG-CUAA----AUA-CUCC-UGACUGACC-GAUAGUG-AACC-AGUA-CCGUGA-GG-GA-AAGGCGAAAA-GAACCCC-UGUGA-GGGGA--GUGAAA-UAGAUCCUGAAA-CCGC--AUGCAUACAA-G-C-AGUG-GGA-GC-AC----C----------------------------------------------------------------------------------------------------------------------------------------------------------------------------------------------------------------------------------------------------------------------------------------------------------------------------------------------------------------------------------------------------------------------------------------------------------------------------------------------------------------------------------------------------------------uucgu------------------------------------------------G-GU--G-UGAC-UGCGUACCU-U-UUG-UAUAAUGGGUCAGCGACUU-AU-A-UUC-AGU-AGC----AAGGUUAA-CC--------GUAUA---GG-GG-AGCCGUA--GGGAAA-CCGAG-UCU-UAA---UAGGGCGU----------------------------------------------------------------------------------------------------------------------------------------------------------------------------------------------------------------------------------------------------------------------------------------------------------------------------------------------------uuaG-UUGCUGG-GUAUA-GACCCG-AAAC-C-AG-GCGA-UCUAUCCAUGA-GCAGGUUGAA-GGU-UGGGUA-ACAC-UAACU-GGA-GGACCGAACC-CAC-UG-UC--GUUG-AAAAGCCA-GGGG-AUGAC-UUGUGGAUAgG-GGGU--GAAAGGCU-AAUCAAGC-CUGG-UG-AUAGC-UGGUUCU-CCCCG--AAAG-CUAU-UUAG-GUAGCGC-CUCGGA-CGA------A-UA-C--CA-UA-GGGGGUAG-AGC-ACU-GU-UUCGG-C-UA---GG-GGGUC--AUCCCGACUUACCAA-ACCGAU-GCAAACUCCGAA-UA-CCU-A-U-G--AGUAC----U-AUC-C-GGGAGACAGAC--UGCGGGUGCUAACGUCCGU--AGUC-AAGA-GGA-AAACAA-UCCAGACCGCCAGCUAAG-GC-CCCA-AAAUC-AUAG-U-UAA-GUG--------GGAAACGAUGUG-GGA-AGGCAUA--GACA-G-CUAGG-AGG-UUGGCUUAGAAGCAGCCAC--CCUUUAAAGAAAGC-GUAA-UA--------G-CUCAC-UAGU-------CGA------G-U-CGG-CC--UG-CGCGG--AAGAU-GUAA-C-GGGG--CU--AAAACU-AUG-U--GCC-GAA-G-CUGC-GGau--uu-gac----------auua--------------------------------------------------------------------------------------------------------------------------------------------------------------------------------------------------------------------------------------------------------------------------------------------------------------------------------------------------------------------------------------------------------------------------------------------------------------------gu-c-aa--gu-GG-UAGG--GGA-G-----CGUU-CU-G-UAA-------------------------------------------------------------------------------------------------------------------------G-C-CGA-U-GAA-GG-UG-U-A-UU--GAGA----A-GU--A-UG-CUGGAG-GU-AU-CA-GAA-GUGC-GAA-UGC-UGA--CGUG-AGUA--ACG--ACAA-A-ACG-GGUGA-AAA-ACCCG-UU---CGCC-GAA-AGA-C-CA-----------------------------------------------------AGG-GUU-CCA-G-UC-CAACG-UUA-AU-C--GG--GGCUGGGU--GAGU-CGAC-C-CCUAAGGCGAG--GC-C-----GAAA---G-G-C-GU-AGUCG--AUGG-GAAA-UUG-G--UU-AAUAUUC-CAAUAC-uu-c--ug-ugu-aau-----------------------------------------------------------------------------------------------------------------------------gcgau------g-aga--gga-cggag--aagguua--aguc-a---g-cc-ug-g-----cg--u--ugg-u-ug----u-----------------------------------------------------------------------------------------------------------c--c-aggu--ggaa-----------------ggau-g--uaggu--------------------------------------------auguau-cuua-gg-ca-aa---u--cc--g--ggguacucuau---------------------------------------------------------------------------------------------------------------------------------------------acu--ga--gauccg-auag-c-aa----------------------------------------------------gcu-gu-a-cuu--gu----acagu------------------------------------g-aag----uggcu--gauacc--aug--c-uu-cc-aggaaa-agucuc--uaagcuuca-----------------------------------------------------------------------------------------------------------------gu-u-aca-ca---gg----aAU-CGUA-CCCGAAACCGACACAGGUGG-UCAGGU-C-GAGUA-GACCAA-GGCGCUUGAG-AGAA-CUCUGCUG---------------AAGGAA-CUAGG-CA----------AAAUGGU-ACC-GUAAC--UUCG-GG-AG-AAGGUAC-G-CUGuugu--ugg-u-g--------au-ggaa---cuugc---uucc-u---------gagcug-a-cGACAG-CCGC-AGAAA-CCAGGCC-GC-UGCAACU-GUUUAUUAAAAACAUAGCAC-UCUGCAAACACGAA-A------GUG-GA-C-GUAU-AGGGUGUGA-UGCCUGCCCGGU-GCUG-GAAGG-UUAAUUGAUGG-GGUUA-GC-------G-UAA----------------GCGA-AGCUCUUGAUCGAAG-CCCCAGUAAAC-GGC-GGCC-GUAACUAUAACGGU-CCUAAGGUAGCG-AAAUU-CCUU-GUC-GGGUAAGUUCCGACCUGCACGAA-UGGC-AUAAUGA-UGGCGGC-GCUG-UCU-CCAG-CAGAGGCUCAGUGAA-AUC-GAAAU-CG-CUGUG--AA-GAU-G-CAGUGUACCCGCGGC-UAGACGGAAAGACCCCGUGAACCUU-UACUGCAGCUUGACACUGAACUUUG-ACCUUACUU-GUGUAGGAUAGGUGG-GAGGCUUU-GAA-G------UUG-GAACGCUAGUUCCAAU-GGAGCCGUC-C-UUGAAAUACCACCCU----GG-UAAUGUU-GAGG-UUCUAA-CUC-UG-U----CCCG---UUAUCCGGGAC-GAG-GACCGUGUCUGGUGGG-UAGU-UUGAC-U-GGGGCGGUCUCC-U-CCUAA-AGAGUA-ACGGAGGAGUACGAAG-GUGCGCUCAGCGUGGUCGGAAAUCACGC-GUA---GAGUAUAAAGGCAAAA-GC-GCGCUUAACUGCGAGACCCACAAGUCGAGCAGGUACGAAAGU-AGG-UCUUAGUGAUC-CGGUGGUU-CU-G-UAUGGAAGGGCCAUCGCUCAAC-GGAUAAAAGGUA-CUC-UGGG-G-AU-AACAG-GCUGA--UACCGCCCAAG-A-G-UUC-AUA-UCGACGGCG-GU-GU-UUGGCACCU-CGAUGUCGGCUCAUCUCAUCCUGGGGCUGAAGC---A-GGUC-CC-AAGGGU-AU-GGCU-GUU-CGC--CAUUUA-AAGAGGU-AC-G-CGA-GCUGGGUUUA-GAACGU-CGUGA-GACAGUU-CGG-U-CCCU-AU-CUACCGUGGG-CG-CUGGAAAUUU-GA-G-AGGAUC-UGC--------------UCCUAGUACGAGA-GGACC-AGAGUGGA-CGAACCU--CUGGUGU--ACCGGUUGUGAC-GC-CA-GUCGCA-U-CGC-CGGGUA-GCU-AUGU-U-CGGAAGGGAUAACCGCUGAAAGUUUUUAAGC-A--------------------------------------------------------------------------------------------------------------------------------------------------------------------------------------------------------------------------------------------------------------------------------------------------------------------------------------------------------------------------------------------------------------------------------------------------
>Accession:X87280::SeqID:3152::TaxID:2
-------------------------------------------------------------------------------------------------------------------------------------------------------------------------------------------AGUC-AAGU-A-AU----UAA-GUG-CAUG-UG-GUG-GAUG--CCU-UG-GC-AG-UCAG-A-GGC-GAUGAAA-GA--C-GU-AAUAG--CC-U-GC-G-AUAA-GCU-C-CGGG--GAGGC-G-GCAAAUA----UCC--U-UUGAUC-CGGAG-AUU-UC-UGAAUGGGGGAA-CCC--A-CC-UACU-------------------------------------------------------------------------------------------------------------------------------------------------------------------------------------------------------------------------------------------UUAA-----------GG-UA-GGU-AUUG-C-AACA--U-----------------------------------------------------------------------------------------------------------------------------------------------------------------------------------------------------------------------------------------------GA-AUA-CA--UA----GUG-UU-G----C-A--A-GG-C-GAACGA-GGG-G-AAGUGAAACAUCU-CA-GUA-CCCUUAG-GAAAAGA-AA-UC-A-A--UU------GA-GAUUCC-CU-UAG-UAGC-GGCG-AGCGA-ACG-GGGA-UCA-GCCCC-------------------------------------------------------------------------------------------------------------------------------------------------------------------------------------------------------------------------------------------------au-ua---------------------------------------------aguuaug--ug-uguuuu--aG-UG-GAAc-g-c-u-c-u-ggga-a-g-ugcg-AACGUAG-AGGG-UGAUAUUCCCGU-A-CAC-gaa-agggca-ca--cauaa-----u---gaug--ac----------------------------------------------------------------------------------GAGUA-GGG-C-GAGG--CAC-GUG-AAACCUU-GU-C-U-GAAUAU--GGG-GGGACCAU--CC-UCC-AAGG-CUAA----AUA-CUCC-UGACUGACC-GAUAGUG-AACC-AGUA-CCGUGA-GG-GA-AAGGCGAAAA-GAACCCC-UGUGA-GGGGA--GUGAAA-UAGAUCCUGAAA-CCGC--AUGCAUACAA-G-C-AGUG-GGA-GC-CG----AC----------------------------------------------------------------------------------------------------------------------------------------------------------------------------------------------------------------------------------------------------------------------------------------------------------------------------------------------------------------------------------------------------------------------------------------------------------------------------------------------------------------------------------------------------------------uugu------------------------------------------------U-CG--G-UGAC-UGCGUACCU-U-UUG-UAUAAUGGGUCAGCGACUU-AU-A-UUC-AGU-AGC----GAGGUUAA-CC--------GUAUA---GG-GG-AGCCGUA--GAGAAA-UCGAG-UCU-UAA---UAGGGCGU----------------------------------------------------------------------------------------------------------------------------------------------------------------------------------------------------------------------------------------------------------------------------------------------------------------------------------------------------uuaG-UUGCUGG-GUAUA-GACCCG-AAAC-C-AG-GCGA-UCUAUCCAUGA-GCAGGUUGAA-GGU-UGGGUA-ACAC-UAACU-GGA-GGACCGAACC-CAC-UG-UC--GUUG-AAAAGCCA-GGGG-AUGAC-UUGUGGAUA-G-GGGU--GAAAGGCU-AAUCAAGC-CUGG-UG-AUAGC-UGGUUCU-CCCCG--AAAG-CUAU-UUAG-GUAGCGC-CUCGGA-CGA------A-UA-C--CA-UA-GGGGGUAG-AGC-ACU-GU-UUCGG-C-UA---GG-GGGUC--AUCCCGACUUACCAA-ACCGAU-GCAAACUCCGAA-UA-CCU-A-U-G--AGUAC----U-AUC-C-GGGAGACAGAC--UGCGGGUGCUAACGUCCGU--AGUC-AAGA-GGA-AAACAA-UCCAGACCGCCAGCUAAG-GC-CCCA-AAAUC-AUAG-U-UAA-GUG--------GGAAACGAUGUG-GGA-AGGCAUA--GACA-G-CUAGG-AGG-UUGGCUUAGAAGCAGCCAC--CCUUUAAAGAAAGC-GUAA-UA--------G-CUCAC-UAGU-------CGA------G-U-CGG-CC--UG-CGCGG--AAGAU-GUAA-C-GGGG--CU--AAAACU-AUG-U--GCC-GAA-G-CUGC-GGau--uu-gacu---------uuua-------------------------------------------------------------------------------------------------------------------------------------------------------------------------------------------------------------------------------------------------------------------------------------------------------------------------------------------------------------------------------------------------------------------------------------------------------------------agu-c-aa--gu-GG-UAGG--GGA-G-----CGUU-CU-G-UAA-------------------------------------------------------------------------------------------------------------------------G-C-CGA-U-GAA-GG-UG-U-A-UU--GAGA----A-GU--A-UG-CUGGAG-GU-AU-CA-GAA-GUGC-GAA-UGC-UGA--CGUG-AGUA--ACG--ACAA-A-ACG-GGUGA-AAA-ACCCG-UU---CGCC-GAA-AGA-C-CA-----------------------------------------------------AGG-GUU-CCA-G-UC-CAACG-UUA-AU-C--GG--GGCUGGGU--GAGU-CGAC-C-CCUAAGGCGAG--GC-C-----GAAA---G-G-C-GU-AGUCG--AUGG-GAAA-UUG-G--UU-AAUAUUC-CAAUAC-uu-c--ug-ugu-aau-----------------------------------------------------------------------------------------------------------------------------gcgau------g-aga--gga-cggag--aagguua--aguc-a---g-cc-ug-g-----cg--u--ugg-u-ug----u-----------------------------------------------------------------------------------------------------------c--c-aggu--gaaa-----------------ggaa-g--uaggc--------------------------------------------augcau-cuua-gg-ca-aa---u--cc--g--gggugcucuau---------------------------------------------------------------------------------------------------------------------------------------------gcu--ga--gaucug-auag-c-aa----------------------------------------------------gcu-gu-a-cuu--gu----acagc------------------------------------g-aag----uggcu--gauacc--aug--c-uu-cc-aggaaa-agucuc--uaagcuuca-----------------------------------------------------------------------------------------------------------------gu-u-aca-ca---gg----aAU-CGUA-CCCUAAACCGACACAGGUGG-UCAGGU-C-GAGUA-GACCAA-GGCGCUUGAG-AGAA-CUCUGCUG---------------AAGGAA-CUAGG-CA----------AAAUGGU-ACC-GUAAC--UUCG-GG-AG-AAGGUAC-G-CUGuugu--ugg-u-g--------au-ggaa---cuugc---uucc-u---------gagcug-a-uGACAG-CCAC-AGAAA-CCAGGCC-GC-UGCAACU-GUUUAUUAAAAACAUAGCAC-UCUGCAAACACGAA-A------GUG-GA-C-GUAU-AGGGUGUGA-CGCCUGCCCGGU-GCCG-GAAGG-UUAAGUGAUGG-GGUUA-GC-------G-UAA----------------GCGA-AGCUCUUGAUCGAAG-CCCCAGUAAAC-GGC-GGCC-GUAACUAUAACGGU-CCUAAGGUAGCG-AAAUU-CCUU-GUC-GGGUAAGUUCCGACCUGCACGAA-UGGC-AUAAUGA-UGGCGGC-GCUG-UCU-CCAG-CAGAGGCUCAGUGAA-AUC-GAAAU-CG-CUGUG--AA-GAU-G-CAGUGUACCCGCGGC-UAGACGGAAAGACCCCGUGAACCUU-UACUGCAGCUUGACAUUGAACUUUG-ACCUUACUU-GUGUAGGAUAGGUGG-GAGGCUUU-GAA-G------UUG-GAACGCUAGUUCCAAU-GGAGCCGUC-C-UUGAAAUACCACCCU----GG-UAAUGUU-GAGG-UUCUAA-CUC-UG-C----CCCG---UAAUCCGGGGC-GAG-GACCAUGUCUGGUGGG-UAGU-UUGAC-U-GGGGCGGUCUCC-U-CCUAA-AGAGUA-ACGGAGGAGUACGAAG-GUGCGCUCAGCGUGGUCGGAAAUCACGC-GUA---GAGUAUAAAGGCAAAA-GC-GCGCUUAACUGCGAGACCCACAAGUCGAGCAGGUACGAAAGU-AGG-UCUUAGUGAUC-CGGUGGUU-CU-G-UAUGGAAGGGCCAUCGCUCAAC-GGAUAAAAGGUA-CUC-UGGG-G-AU-AACAG-GCUGA--UACCGCCCAAG-A-G-UUC-AUA-UCGACGGCG-GU-GU-UUGGCACCU-CGAUGUCGGCUCAUCUCAUCCUGGGGCUGAAGC---A-GGUC-CC-AAGGGU-AU-GGCU-GUU-CGC--CAUUUA-AAGAGGU-AC-G-CGA-GCUGGGUUUA-GAACGU-CGUGA-GACAGUU-CGG-U-CCCU-AU-CUACCGUGGG-CG-CUGGAAAUUU-GA-G-AGGAUC-UGC--------------UCCUAGUACGAGA-GGACC-AGAGUGGA-CGAACCU--CUGGUGU--ACCGGUUGUGAC-GC-CA-GUCGCA-U-CGC-CGGGUA-GCU-AUGU-U-CGGAAGGGAUAACCGCUGAAAGCAUCUAAGC-GGGAAGCCUA-CC-UAAG-AUAA-GAUUUCCCUA-GGACU------------UUA--------------------------------------------------------------------------------------------------------UGUCC-U-CUA-AAGA-GC-CGUUCGAGACU-AGGACGUU-GAUAGGUU-GG-AUGUG-GAAGCAUA--GUGA---UAUGU-GA-AGCUG-A-CCAAUACUAAUU-GCUCG-UGAG-GCUUGA-CU-AUacaacaccc------------------------------------------------------------------------------------------------------------------------------------------
>Accession:CR543861::SeqID:3321::TaxID:2
-------------------------------------------------------------------------------------------------------------------------------------------------------------------------------------------AGUC-AAGU-A-AU----UAA-GUG-CAUG-UG-GUG-GAUG--CCU-UG-GC-AG-UCAG-A-GGC-GAUGAAA-GA--C-GU-GAUAG--CC-U-GC-G-AAAA-GCU-C-CGGG--GAGGC-G-GCAAAUA----UCC--U-UUGAUC-CGGAG-AUG-UC-UGAAUGGGGAAA-CCC--A-CU-UAUC-------------------------------------------------------------------------------------------------------------------------------------------------------------------------------------------------------------------------------------------AUAA-----------GA-UA-GGU-AUUG-C-AUGA--U-----------------------------------------------------------------------------------------------------------------------------------------------------------------------------------------------------------------------------------------------GA-AUA-CA--UA----GUC-AU-G----C-A--A-GG-C-GAACGA-GGG-G-AAGUGAAACAUCU-CA-GUA-CCCUUAG-GAAAAGA-AA-UC-A-A--UU------GA-GAUUCC-CU-UAG-UAGC-GGCG-AGCGA-AAG-GGGA-ACA-GCCC--------------------------------------------------------------------------------------------------------------------------------------------------------------------------------------------------------------------------------------------------au-ua---------------------------------------------aguugug--ug-uguucu--aG-UG-GAAc-g-c-u-c-u-ggga-a-g-ugcg-AACGUAG-AGGG-UGAUAUUCCCGU-A-CAC-gaa-agggca-ca--cacaa-----u---gaug--ac----------------------------------------------------------------------------------GAGUA-GGG-C-GAGG--CAC-GUG-AAACCUU-GU-C-U-GAAUAU--GGG-GGGACCAU--CC-UCC-AAGG-CUAA----AUA-CUCC-UGACUGACC-GAUAGUG-AACC-AGUA-CCGUGA-GG-GA-AAGGCGAAAA-GAACCCC-UGUGA-GGGGA--GUGAAA-UAGAUCCUGAAA-CCGC--AUGCAUACAA-G-C-AGUG-GGA-GC-CG----A----------------------------------------------------------------------------------------------------------------------------------------------------------------------------------------------------------------------------------------------------------------------------------------------------------------------------------------------------------------------------------------------------------------------------------------------------------------------------------------------------------------------------------------------------------------cuugu------------------------------------------------U-CG--G-UGAC-UGCGUACCU-U-UUG-UAUAAUGGGUCAGCGACUU-AU-A-UUC-AGU-AGC----AAGGUUAA-CC--------GCAUA---GG-GG-AGCCGUA--GGGAAA-CCGAG-UCU-UAA---UAGGGCGU----------------------------------------------------------------------------------------------------------------------------------------------------------------------------------------------------------------------------------------------------------------------------------------------------------------------------------------------------auaG-UUGCUGG-GUAUA-GACCCG-AAAC-C-AG-GCGA-UCUAUCCAUGA-GCAGGUUGAA-GGU-UGGGUA-ACAC-UAACU-GGA-GGACCGAACC-CAC-UG-UC--GUUG-AAAAGCCA-GGGG-AUGAC-UUGUGGAUA-G-GGGU--GAAAGGCU-AAUCAAGC-CUGG-UG-AUAGC-UGGUUCU-CCCCG--AAAG-CUAU-UUAG-GUAGCGC-CUCGGA-CGA------A-UA-C--CA-UA-GGGGGUAG-AGC-ACU-GU-UUCGG-C-UA---GG-GGGUC--AUCCCGACUUACCAA-ACCGAU-GCAAACUCCGAA-UA-CCU-A-U-G--AGUAC----U-AUC-C-GGGAGACAGAC--UGCGGGUGCUAACGUCCGU--AGUC-AAGA-GGA-AAACAA-UCCAGACCGCCAGCUAAG-GC-CCCA-AAAUC-AUAG-U-UAA-GUG--------GGAAACGAUGUG-GGA-AGGCAUA--GACA-G-CUAGG-AGG-UUGGCUUAGAAGCAGCCAC--CCUUUAAAGAAAGC-GUAA-UA--------G-CUCAC-UAGU-------CGA------G-U-CGG-CC--UG-CGCGG--AAGAU-GUAA-C-GGGG--CU--AAAACU-AUG-U--GCC-GAA-G-CUGC-GGau--gu-aacu---------uu-a-------------------------------------------------------------------------------------------------------------------------------------------------------------------------------------------------------------------------------------------------------------------------------------------------------------------------------------------------------------------------------------------------------------------------------------------------------------------agu-u-ac--gu-GG-UAGG--GGA-G-----CGUU-CU-G-UAA-------------------------------------------------------------------------------------------------------------------------G-C-CGA-U-GAA-GG-UG-G-A-UU--GAGA----A-GU--C-UG-CUGGAG-GU-AU-CA-GAA-GUGC-GAA-UGC-UGA--CGUG-AGUA--ACG--ACAA-A-ACG-GGUGA-AAA-ACCCG-UU---CGCC-GAA-AGA-C-CA-----------------------------------------------------AGG-GUU-CCA-G-UC-CAACG-UUA-AU-C--GG--GGCUGGGU--GAGU-CGAC-C-CCUAAGGCGAG--GC-C-----GAAA---G-G-C-GU-AGUCG--AUGG-GAAA-UUG-G--UU-AAUAUUC-CAAUAC-uu-c--ug-ugu-aau-----------------------------------------------------------------------------------------------------------------------------gcgau------g-aga--gga-cggag--aagguua--gguc-a---g-cc-ug-g-----cg--u--ugg-u-ug----u-----------------------------------------------------------------------------------------------------------c--c-aggu--ggaa-----------------gaca-g--uaggc--------------------------------------------augcau-cuua-gg-ca-aa---u--cc--g--gggugcucuau---------------------------------------------------------------------------------------------------------------------------------------------gcu--ga--gagucg-auag-c-aa----------------------------------------------------gcu-ag----uu--ua----cuagc------------------------------------g-aag----uggcu--gauacc--aua--c-uu-cc-aagaaa-agucuc--uaagcuaca-----------------------------------------------------------------------------------------------------------------gu-u-aca-ca---gg----aAU-CGUA-CCCGAAACCGACACAGGUGG-UCAGGU-C-GAGUA-GACCAA-GGCGCUUGAG-AGAA-CUCUGCUG---------------AAGGAA-CUAGG-CA----------AAAUGGU-ACC-GUAAC--UUCG-GG-AG-AAGGUAC-G-CUGuuga--ugg-u-g--------au-ggga---cuugc---uccc-u---------gagcga-u-uGACAG-CCGC-AGAAA-CCAGGCC-GC-UGCAACU-GUUUAUUAAAAACAUAGCAC-UCUGCAAACACGAA-A------GUG-GA-C-GUAU-AGGGUGUGA-UGCCUGCCCGGU-GCUG-GAAGG-UUAAUUGAUGG-GGUUA-GC-------G-UAA----------------GCGA-AGCUCUUGAUCGAAG-CCCCAGUAAAC-GGC-GGCC-GUAACUAUAACGGU-CCUAAGGUAGCG-AAAUU-CCUU-GUC-GGGUAAGUUCCGACCUGCACGAA-UGGC-AUAAUGA-UGGCGGC-GCUG-UCU-CCAG-CAGAGGCUCAGUGAA-AUC-GAAUU-CG-CCGUG--AA-GAU-G-CGGUGUACCCGCGGC-UAGACGGAAAGACCCCGUGAACCUU-UACUGCAGCUUGACAUUGAACUUUG-ACCUUACUU-GUGUAGGAUAGGUGG-GAGGCUUU-GAA-G------AUG-GGACGCCAGUUCCAUU-GGAGCCAUC-C-UUGAAAUACCACCCU----GG-UAAUGUU-GAGG-UUCUAA-CUC-UG-C----CCCG---UAAUCCGGGGC-GAG-GACCAUGUCUGGUGGG-UAGU-UUGAC-U-GGGGCGGUCUCC-U-CCUAA-AGAGUA-ACGGAGGAGUACGAAG-GUGCGCUCAGCGUGGUCGGAAAUCACGC-GUA---GAGUAUAAAGGCAAAA-GC-GCGCUUAACUGCGAGACCCACAAGUCGAGCAGGUACGAAAGU-AGG-UCUUAGUGAUC-CGGUGGUU-CU-G-UAUGGAAGGGCCAUCGCUCAAC-GGAUAAAAGGUA-CUC-UGGG-G-AU-AACAG-GCUGA--UACCGCCCAAG-A-G-UUC-AUA-UCGACGGCG-GU-GU-UUGGCACCU-CGAUGUCGGCUCAUCUCAUCCUGGGGCUGAAGC---A-GGUC-CC-AAGGGU-AU-GGCU-GUU-CGC--CAUUUA-AAGAGGU-AC-G-CGA-GCUGGGUUUA-GAACGU-CGUGA-GACAGUU-CGG-U-CCCU-AU-CUACCGUGGG-CG-CUGGAAAUUU-GA-G-AGGAUC-UGC--------------UCCUAGUACGAGA-GGACC-AGAGUGGA-CGAACCU--CUGGUGU--ACCGGUUGUGAC-GC-CA-GUCGCA-U-CGC-CGGGUA-GCU-AUGU-U-CGGAAGGGAUAACCGCUGAAAGCAUCUAAGC-GGGAAGCCUA-CCUCAAG-AUAA-GAUUUCCCUA-GGAA------------UUUA---------------------------------------------------------------------------------------------------------UUCC-U-CUA-AAGA-GC-CGUUCAAGACU-AGGACGUU-GAUAGGUU-GG-AUGUG-GAAGCAUA--GUGA---UAUGU-GA-AGCUG-A-CCAAUACUAAUU-GCUCG-UGAG-GCUUGA-CU-AUacaacaccc------------------------------------------------------------------------------------------------------------------------------------------
>Accession:CR543861::SeqID:3322::TaxID:2
-------------------------------------------------------------------------------------------------------------------------------------------------------------------------------------------AGUC-AAGU-A-AU----UAA-GUG-CAUG-UG-GUG-GAUG--CCU-UG-GC-AG-UCAG-A-GGC-GAAGAAA-GA--C-GU-GAUAG--CC-U-GC-G-AAAA-GCU-C-CGGG--GAGGC-G-GCAAAUA----UCC--U-GUGAUC-CGGAG-AUG-UC-UGAAUGGGGAAA-CCC--A-CU-UAUC-------------------------------------------------------------------------------------------------------------------------------------------------------------------------------------------------------------------------------------------AUAA-----------GA-UA-GGU-AUUG-C-AUGA--U-----------------------------------------------------------------------------------------------------------------------------------------------------------------------------------------------------------------------------------------------GA-AUA-CA--UA----GUC-AU-G----C-A--A-GG-C-GAACGA-GGG-G-AAGUGAAACAUCU-CA-GUA-CCCUUAG-GAAAAGA-AA-UC-A-A--UU------GA-GAUUCC-CU-UAG-UAGC-GGCG-AGCGA-AAG-GGGA-ACA-GCCC--------------------------------------------------------------------------------------------------------------------------------------------------------------------------------------------------------------------------------------------------au-ua---------------------------------------------aguugug--ug-uguucu--aG-UG-GAAc-g-c-u-c-u-ggga-a-g-ugcg-AACGUAG-AGGG-UGAUAUUCCCGU-A-CAC-gaa-agggca-ca--cacaa-----u---gaug--ac----------------------------------------------------------------------------------GAGUA-GGG-C-GAGG--CAC-GUG-AAACCUU-GU-C-U-GAAUAU--GGG-GGGACCAU--CC-UCC-AAGG-CUAA----AUA-CUCC-UGACUGACC-GAUAGUG-AACC-AGUA-CCGUGA-GG-GA-AAGGCGAAAA-GAACCCC-UGUGA-GGGGA--GUGAAA-UAGAUCCUGAAA-CCGC--AUGCAUACAA-G-C-AGUG-GGA-GC-CG----A----------------------------------------------------------------------------------------------------------------------------------------------------------------------------------------------------------------------------------------------------------------------------------------------------------------------------------------------------------------------------------------------------------------------------------------------------------------------------------------------------------------------------------------------------------------cuugu------------------------------------------------U-CG--G-UGAC-UGCGUACCU-U-UUG-UAUAAUGGGUCAGCGACUU-AU-A-UUC-AGU-AGC----AAGGUUAA-CC--------GCAUA---GG-GG-AGCCGUA--GGGAAA-CCGAG-UCU-UAA---UAGGGCGU----------------------------------------------------------------------------------------------------------------------------------------------------------------------------------------------------------------------------------------------------------------------------------------------------------------------------------------------------auaG-UUGCUGG-GUAUA-GACCCG-AAAC-C-AG-GCGA-UCUAUCCAUGA-GCAGGUUGAA-GGU-UGGGUA-ACAC-UAACU-GGA-GGACCGAACC-CAC-UG-UC--GUUG-AAAAGCCA-GGGG-AUGAC-UUGUGGAUA-G-GGGU--GAAAGGCU-AAUCAAGC-CUGG-UG-AUAGC-UGGUUCU-CCCCG--AAAG-CUAU-UUAG-GUAGCGC-CUCGGA-CGA------A-UA-C--CA-UA-GGGGGUAG-AGC-ACU-GU-UUCGG-C-UA---GG-GGGUC--AUCCCGACUUACCAA-ACCGAU-GCAAACUCCGAA-UA-CCU-A-U-G--AGUAC----U-AUC-C-GGGAGACAGAC--UGCGGGUGCUAACGUCCGU--AGUC-AAGA-GGA-AAACAA-UCCAGACCGCCAGCUAAG-GC-CCCA-AAAUC-AUAG-U-UAA-GUG--------GGAAACGAUGUG-GGA-AGGCAUA--GACA-G-CUAGG-AGG-UUGGCUUAGAAGCAGCCAC--CCUUUAAAGAAAGC-GUAA-UA--------G-CUCAC-UAGU-------CGA------G-U-CGG-CC--UG-CGCGG--AAGAU-GUAA-C-GGGG--CU--AAAACU-AUG-U--GCC-GAA-G-CUGC-GGau--gu-aacu---------uu-a-------------------------------------------------------------------------------------------------------------------------------------------------------------------------------------------------------------------------------------------------------------------------------------------------------------------------------------------------------------------------------------------------------------------------------------------------------------------agu-u-ac--gu-GG-UAGG--GGA-G-----CGUU-CU-G-UAA-------------------------------------------------------------------------------------------------------------------------G-C-CGA-U-GAA-GG-UG-G-A-UU--GAGA----A-GU--C-UG-CUGGAG-GU-AU-CA-GAA-GUGC-GAA-UGC-UGA--CGUG-AGUA--ACG--ACAA-A-ACG-GGUGA-AAA-ACCCG-UU---CGCC-GAA-AGA-C-CA-----------------------------------------------------AGG-GUU-CCA-G-UC-CAACG-UUA-AU-C--GG--GGCUGGGU--GAGU-CGAC-C-CCUAAGGCGAG--GC-C-----GAAA---G-G-C-GU-AGUCG--AUGG-GAAA-UUG-G--UU-AAUAUUC-CAAUAC-uu-c--ug-ugu-aau-----------------------------------------------------------------------------------------------------------------------------gcgau------g-aga--gga-cggag--aagguua--gguc-a---g-cc-ug-g-----cg--u--ugg-u-ug----u-----------------------------------------------------------------------------------------------------------c--c-aggu--ggaa-----------------gaca-g--uaggc--------------------------------------------augcau-cuua-gg-ca-aa---u--cc--g--gggugcucuau---------------------------------------------------------------------------------------------------------------------------------------------gcu--ga--gagucg-auag-c-aa----------------------------------------------------gcu-ag----uu--ua----cuagc------------------------------------g-aag----uggcu--gauacc--aua--c-uu-cc-aagaaa-agucuc--uaagcuaca-----------------------------------------------------------------------------------------------------------------gu-u-aca-ca---gg----aAU-CGUA-CCCGAAACCGACACAGGUGG-UCAGGU-C-GAGUA-GACCAA-GGCGCUUGAG-AGAA-CUCUGCUG---------------AAGGAA-CUAGG-CA----------AAAUGGU-ACC-GUAAC--UUCG-GG-AG-AAGGUAC-G-CUGuuga--ugg-u-g--------au-ggga---cuugc---uccc-u---------gagcga-u-uGACAG-CCGC-AGAAA-CCAGGCC-GC-UGCAACU-GUUUAUUAAAAACAUAGCAC-UCUGCAAACACGAA-A------GUG-GA-C-GUAU-AGGGUGUGA-UGCCUGCCCGGU-GCUG-GAAGG-UUAAUUGAUGG-GGUUA-GC-------G-UAA----------------GCGA-AGCUCUUGAUCGAAG-CCCCAGUAAAC-GGC-GGCC-GUAACUAUAACGGU-CCUAAGGUAGCG-AAAUU-CCUU-GUC-GGGUAAGUUCCGACCUGCACGAA-UGGC-AUAAUGA-UGGCGGC-GCUG-UCU-CCAG-CAGAGGCUCAGUGAA-AUC-GAAUU-CG-CCGUG--AA-GAU-G-CGGUGUACCCGCGGC-UAGACGGAAAGACCCCGUGAACCUU-UACUGCAGCUUGACAUUGAACUUUG-ACCUUACUU-GUGUAGGAUAGGUGG-GAGGCUAU-GAA-G------AUG-GGACGCCAGUUCCAUU-GGAGCCAUC-C-UUGAAAUACCACCCU----GG-UAAUGUU-GAGG-UUCUAA-CUC-UG-C----CCCG---UAAUCCGGGGC-GAG-GACCAUGUCUGGUGGG-UAGU-UUGAC-U-GGGGCGGUCUCC-U-CCUAA-AGAGUA-ACGGAGGAGUACGAAG-GUGCGCUCAGCGUGGUCGGAAAUCACGC-GUA---GAGUAUAAAGGCAAAA-GC-GCGCUUAACUGCGAGACCCACAAGUCGAGCAGGUACGAAAGU-AGG-UCUUAGUGAUC-CGGUGGUU-CU-G-UAUGGAAGGGCCAUCGCUCAAC-GGAUAAAAGGUA-CUC-UGGG-G-AU-AACAG-GCUGA--UACCGCCCAAG-A-G-UUC-AUA-UCGACGGCG-GU-GU-UUGGCACCU-CGAUGUCGGCUCAUCUCAUCCUGGGGCUGAAGC---A-GGUC-CC-AAGGGU-AU-GGCU-GUU-CGC--CAUUUA-AAGAGGU-AC-G-CGA-GCUGGGUUUA-GAACGU-CGUGA-GACAGUU-CGG-U-CCCU-AU-CUACCGUGGG-CG-CUGGAAAUUU-GA-G-AGGAUC-UGC--------------UCCUAGUACGAGA-GGACC-AGAGUGGA-CGAACCU--CUGGUGU--ACCGGUUGUGAC-GC-CA-GUCGCA-U-CGC-CGGGUA-GCU-AUGU-U-CGGAAGGGAUAACCGCUGAAAGCAUCUAAGC-GGGAAGCCUA-CCUCAAG-AUAA-GAUUUCCCUA-GGAA------------UUUA---------------------------------------------------------------------------------------------------------UUCC-U-CUA-AAGA-GC-CGUUCAAGACU-AGGACGUU-GAUAGGUU-GG-AUGUG-GAAGCAUA--GUGA---UAUGU-GA-AGCUG-A-CCAAUACUAAUU-GCUCG-UGAG-GCUUGA-CU-AUacaacaccc------------------------------------------------------------------------------------------------------------------------------------------
>Accession:CR543861::SeqID:3323::TaxID:2
-------------------------------------------------------------------------------------------------------------------------------------------------------------------------------------------AGUC-AAGU-A-AU----UAA-GUG-CAUG-UG-GUG-GAUG--CCU-UG-GC-AG-UCAG-A-GGC-GAAGAAA-GA--C-GU-GAUAG--CC-U-GC-G-AAAA-GCU-C-CGGG--GAGGC-G-GCAAAUA----UCC--U-GUGAUC-CGGAG-AUG-UC-UGAAUGGGGAAA-CCC--A-CU-UAUC-------------------------------------------------------------------------------------------------------------------------------------------------------------------------------------------------------------------------------------------AUAA-----------GA-UA-GGU-AUUG-C-AUGA--U-----------------------------------------------------------------------------------------------------------------------------------------------------------------------------------------------------------------------------------------------GA-AUA-CA--UA----GUC-AU-G----C-A--A-GG-C-GAACGA-GGG-G-AAGUGAAACAUCU-CA-GUA-CCCUUAG-GAAAAGA-AA-UC-A-A--UU------GA-GAUUCC-CU-UAG-UAGC-GGCG-AGCGA-AAG-GGGA-ACA-GCCC--------------------------------------------------------------------------------------------------------------------------------------------------------------------------------------------------------------------------------------------------au-ua---------------------------------------------aguugug--ug-uguucu--aG-UG-GAAc-g-c-u-c-u-ggga-a-g-ugcg-AACGUAG-AGGG-UGAUAUUCCCGU-A-CAC-gaa-agggca-ca--cacaa-----u---gaug--ac----------------------------------------------------------------------------------GAGUA-GGG-C-GAGG--CAC-GUG-AAACCUU-GU-C-U-GAAUAU--GGG-GGGACCAU--CC-UCC-AAGG-CUAA----AUA-CUCC-UGACUGACC-GAUAGUG-AACC-AGUA-CCGUGA-GG-GA-AAGGCGAAAA-GAACCCC-UGUGA-GGGGA--GUGAAA-UAGAUCCUGAAA-CCGC--AUGCAUACAA-G-C-AGUG-GGA-GC-CG----A----------------------------------------------------------------------------------------------------------------------------------------------------------------------------------------------------------------------------------------------------------------------------------------------------------------------------------------------------------------------------------------------------------------------------------------------------------------------------------------------------------------------------------------------------------------cuugu------------------------------------------------U-CG--G-UGAC-UGCGUACCU-U-UUG-UAUAAUGGGUCAGCGACUU-AU-A-UUC-AGU-AGC----AAGGUUAA-CC--------GCAUA---GG-GG-AGCCGUA--GGGAAA-CCGAG-UCU-UAA---UAGGGCGU----------------------------------------------------------------------------------------------------------------------------------------------------------------------------------------------------------------------------------------------------------------------------------------------------------------------------------------------------auaG-UUGCUGG-GUAUA-GACCCG-AAAC-C-AG-GCGA-UCUAUCCAUGA-GCAGGUUGAA-GGU-UGGGUA-ACAC-UAACU-GGA-GGACCGAACC-CAC-UG-UC--GUUG-AAAAGCCA-GGGG-AUGAC-UUGUGGAUA-G-GGGU--GAAAGGCU-AAUCAAGC-CUGG-UG-AUAGC-UGGUUCU-CCCCG--AAAG-CUAU-UUAG-GUAGCGC-CUCGGA-CGA------A-UA-C--CA-UA-GGGGGUAG-AGC-ACU-GU-UUCGG-C-UA---GG-GGGUC--AUCCCGACUUACCAA-ACCGAU-GCAAACUCCGAA-UA-CCU-A-U-G--AGUAC----U-AUC-C-GGGAGACAGAC--UGCGGGUGCUAACGUCCGU--AGUC-AAGA-GGA-AAACAA-UCCAGACCGCCAGCUAAG-GC-CCCA-AAAUC-AUAG-U-UAA-GUG--------GGAAACGAUGUG-GGA-AGGCAUA--GACA-G-CUAGG-AGG-UUGGCUUAGAAGCAGCCAC--CCUUUAAAGAAAGC-GUAA-UA--------G-CUCAC-UAGU-------CGA------G-U-CGG-CC--UG-CGCGG--AAGAU-GUAA-C-GGGG--CU--AAAACU-AUG-U--GCC-GAA-G-CUGC-GGau--gu-aacu---------uu-a-------------------------------------------------------------------------------------------------------------------------------------------------------------------------------------------------------------------------------------------------------------------------------------------------------------------------------------------------------------------------------------------------------------------------------------------------------------------agu-u-ac--gu-GG-UAGG--GGA-G-----CGUU-CU-G-UAA-------------------------------------------------------------------------------------------------------------------------G-C-CGA-U-GAA-GG-UG-G-A-UU--GAGA----A-GU--C-UG-CUGGAG-GU-AU-CA-GAA-GUGC-GAA-UGC-UGA--CGUG-AGUA--ACG--ACAA-A-ACG-GGUGA-AAA-ACCCG-UU---CGCC-GAA-AGA-C-CA-----------------------------------------------------AGG-GUU-CCA-G-UC-CAACG-UUA-AU-C--GG--GGCUGGGU--GAGU-CGAC-C-CCUAAGGCGAG--GC-C-----GAAA---G-G-C-GU-AGUCG--AUGG-GAAA-UUG-G--UU-AAUAUUC-CAAUAC-uu-c--ug-ugu-aau-----------------------------------------------------------------------------------------------------------------------------gcgau------g-aga--gga-cggag--aagguua--gguc-a---g-cc-ug-g-----cg--u--ugg-u-ug----u-----------------------------------------------------------------------------------------------------------c--c-aggu--ggaa-----------------gaca-g--uaggc--------------------------------------------augcau-cuua-gg-ca-aa---u--cc--g--gggugcucuau---------------------------------------------------------------------------------------------------------------------------------------------gcu--ga--gagucg-auag-c-aa----------------------------------------------------gcu-ag----uu--ua----cuagc------------------------------------g-aag----uggcu--gauacc--aua--c-uu-cc-aagaaa-agucuc--uaagcuaca-----------------------------------------------------------------------------------------------------------------gu-u-aca-ca---gg----aAU-CGUA-CCCGAAACCGACACAGGUGG-UCAGGU-C-GAGUA-GACCAA-GGCGCUUGAG-AGAA-CUCUGCUG---------------AAGGAA-CUAGG-CA----------AAAUGGU-ACC-GUAAC--UUCG-GG-AG-AAGGUAC-G-CUGuuga--ugg-u-g--------au-ggga---cuugc---uccc-u---------gagcga-u-uGACAG-CCGC-AGAAA-CCAGGCC-GC-UGCAACU-GUUUAUUAAAAACAUAGCAC-UCUGCAAACACGAA-A------GUG-GA-C-GUAU-AGGGUGUGA-UGCCUGCCCGGU-GCUG-GAAGG-UUAAUUGAUGG-GGUUA-GC-------G-UAA----------------GCGA-AGCUCUUGAUCGAAG-CCCCAGUAAAC-GGC-GGCC-GUAACUAUAACGGU-CCUAAGGUAGCG-AAAUU-CCUU-GUC-GGGUAAGUUCCGACCUGCACGAA-UGGC-AUAAUGA-UGGCGGC-GCUG-UCU-CCAG-CAGAGGCUCAGUGAA-AUC-GAAUU-CG-CCGUG--AA-GAU-G-CGGUGUACCCGCGGC-UAGACGGAAAGACCCCGUGAACCUU-UACUGCAGCUUGACAUUGAACUUUG-ACCUUACUU-GUGUAGGAUAGGUGG-GAGGCUAU-GAA-G------AUG-GGACGCCAGUUCCAUU-GGAGCCAUC-C-UUGAAAUACCACCCU----GG-UAAUGUU-GAGG-UUCUAA-CUC-UG-C----CCCG---UGAUCCGGGGC-GAG-GACCAUGUCUGGUGGG-UAGU-UUGAC-U-GGGGCGGUCUCC-U-CCUAA-AGAGUA-ACGGAGGAGUACGAAG-GUGCGCUCAGCGUGGUCGGAAAUCACGC-GUA---GAGUAUAAAGGCAAAA-GC-GCGCUUAACUGCGAGACCCACAAGUCGAGCAGGUACGAAAGU-AGG-UCUUAGUGAUC-CGGUGGUU-CU-G-UAUGGAAGGGCCAUCGCUCAAC-GGAUAAAAGGUA-CUC-UGGG-G-AU-AACAG-GCUGA--UACCGCCCAAG-A-G-UUC-AUA-UCGACGGCG-GU-GU-UUGGCACCU-CGAUGUCGGCUCAUCUCAUCCUGGGGCUGAAGC---A-GGUC-CC-AAGGGU-AU-GGCU-GUU-CGC--CAUUUA-AAGAGGU-AC-G-CGA-GCUGGGUUUA-GAACGU-CGUGA-GACAGUU-CGG-U-CCCU-AU-CUACCGUGGG-CG-CUGGAAAUUU-GA-G-AGGAUC-UGC--------------UCCUAGUACGAGA-GGACC-AGAGUGGA-CGAACCU--CUGGUGU--ACCGGUUGUGAC-GC-CA-GUCGCA-U-CGC-CGGGUA-GCU-AUGU-U-CGGAAGGGAUAACCGCUGAAAGCAUCUAAGC-GGGAAGCCUA-CCUCAAG-AUAA-GAUUUCCCUA-GGAA------------UUUA---------------------------------------------------------------------------------------------------------UUCC-U-CUA-AAGA-GC-CGUUCAAGACU-AGGACGUU-GAUAGGUU-GG-AUGUG-GAAGCAUA--GUGA---UAUGU-GA-AGCUG-A-CCAAUACUAAUU-GCUCG-UGAG-GCUUGA-CU-AUacaacaccc------------------------------------------------------------------------------------------------------------------------------------------
>Accession:CR543861::SeqID:3324::TaxID:2
-------------------------------------------------------------------------------------------------------------------------------------------------------------------------------------------AGUC-AAGU-A-AU----UAA-GUG-CAUG-UG-GUG-GAUG--CCU-UG-GC-AG-UCAG-A-GGC-GAUGAAA-GA--C-GU-GAUAG--CC-U-GC-G-AAAA-GCU-C-CGGG--GAGGC-G-GCAAAUA----UCC--U-UUGAUC-CGGAG-AUG-UC-UGAAUGGGGAAA-CCC--A-CU-UAUC-------------------------------------------------------------------------------------------------------------------------------------------------------------------------------------------------------------------------------------------AUAA-----------GA-UA-GGU-AUUG-C-AUGA--U-----------------------------------------------------------------------------------------------------------------------------------------------------------------------------------------------------------------------------------------------GA-AUA-CA--UA----GUC-AU-G----C-A--A-GG-C-GAACGA-GGG-G-AAGUGAAACAUCU-CA-GUA-CCCUUAG-GAAAAGA-AA-UC-A-A--UU------GA-GAUUCC-CU-UAG-UAGC-GGCG-AGCGA-AAG-GGGA-ACA-GCCC--------------------------------------------------------------------------------------------------------------------------------------------------------------------------------------------------------------------------------------------------au-ua---------------------------------------------aguugug--ug-uguucu--aG-UG-GAAc-g-c-u-c-u-ggga-a-g-ugcg-AACGUAG-AGGG-UGAUAUUCCCGU-A-CAC-gaa-agggca-ca--cacaa-----u---gaug--ac----------------------------------------------------------------------------------GAGUA-GGG-C-GAGG--CAC-GUG-AAACCUU-GU-C-U-GAAUAU--GGG-GGGACCAU--CC-UCC-AAGG-CUAA----AUA-CUCC-UGACUGACC-GAUAGUG-AACC-AGUA-CCGUGA-GG-GA-AAGGCGAAAA-GAACCCC-UGUGA-GGGGA--GUGAAA-UAGAUCCUGAAA-CCGC--AUGCAUACAA-G-C-AGUG-GGA-GC-CG----A----------------------------------------------------------------------------------------------------------------------------------------------------------------------------------------------------------------------------------------------------------------------------------------------------------------------------------------------------------------------------------------------------------------------------------------------------------------------------------------------------------------------------------------------------------------cuugu------------------------------------------------U-CG--G-UGAC-UGCGUACCU-U-UUG-UAUAAUGGGUCAGCGACUU-AU-A-UUC-AGU-AGC----AAGGUUAA-CC--------GCAUA---GG-GG-AGCCGUA--GGGAAA-CCGAG-UCU-UAA---UAGGGCGU----------------------------------------------------------------------------------------------------------------------------------------------------------------------------------------------------------------------------------------------------------------------------------------------------------------------------------------------------auaG-UUGCUGG-GUAUA-GACCCG-AAAC-C-AG-GCGA-UCUAUCCAUGA-GCAGGUUGAA-GGU-UGGGUA-ACAC-UAACU-GGA-GGACCGAACC-CAC-UG-UC--GUUG-AAAAGCCA-GGGG-AUGAC-UUGUGGAUA-G-GGGU--GAAAGGCU-AAUCAAGC-CUGG-UG-AUAGC-UGGUUCU-CCCCG--AAAG-CUAU-UUAG-GUAGCGC-CUCGGA-CGA------A-UA-C--CA-UA-GGGGGUAG-AGC-ACU-GU-UUCGG-C-UA---GG-GGGUC--AUCCCGACUUACCAA-ACCGAU-GCAAACUCCGAA-UA-CCU-A-U-G--AGUAC----U-AUC-C-GGGAGACAGAC--UGCGGGUGCUAACGUCCGU--AGUC-AAGA-GGA-AAACAA-UCCAGACCGCCAGCUAAG-GC-CCCA-AAAUC-AUAG-U-UAA-GUG--------GGAAACGAUGUG-GGA-AGGCAUA--GACA-G-CUAGG-AGG-UUGGCUUAGAAGCAGCCAC--CCUUUAAAGAAAGC-GUAA-UA--------G-CUCAC-UAGU-------CGA------G-U-CGG-CC--UG-CGCGG--AAGAU-GUAA-C-GGGG--CU--AAAACU-AUG-U--GCC-GAA-G-CUGC-GGau--gu-aacu---------uu-a-------------------------------------------------------------------------------------------------------------------------------------------------------------------------------------------------------------------------------------------------------------------------------------------------------------------------------------------------------------------------------------------------------------------------------------------------------------------agu-u-ac--gu-GG-UAGG--GGA-G-----CGUU-CU-G-UAA-------------------------------------------------------------------------------------------------------------------------G-C-CGA-U-GAA-GG-UG-G-A-UU--GAGA----A-GU--C-UG-CUGGAG-GU-AU-CA-GAA-GUGC-GAA-UGC-UGA--CGUG-AGUA--ACG--ACAA-A-ACG-GGUGA-AAA-ACCCG-UU---CGCC-GAA-AGA-C-CA-----------------------------------------------------AGG-GUU-CCA-G-UC-CAACG-UUA-AU-C--GG--GGCUGGGU--GAGU-CGAC-C-CCUAAGGCGAG--GC-C-----GAAA---G-G-C-GU-AGUCG--AUGG-GAAA-UUG-G--UU-AAUAUUC-CAAUAC-uu-c--ug-ugu-aau-----------------------------------------------------------------------------------------------------------------------------gcgau------g-aga--gga-cggag--aagguua--gguc-a---g-cc-ug-g-----cg--u--ugg-u-ug----u-----------------------------------------------------------------------------------------------------------c--c-aggu--ggaa-----------------gaca-g--uaggc--------------------------------------------augcau-cuua-gg-ca-aa---u--cc--g--gggugcucuau---------------------------------------------------------------------------------------------------------------------------------------------gcu--ga--gagucg-auag-c-aa----------------------------------------------------gcu-ag----uu--ua----cuagc------------------------------------g-aag----uggcu--gauacc--aua--c-uu-cc-aagaaa-agucuc--uaagcuaca-----------------------------------------------------------------------------------------------------------------gu-u-aca-ca---gg----aAU-CGUA-CCCGAAACCGACACAGGUGG-UCAGGU-C-GAGUA-GACCAA-GGCGCUUGAG-AGAA-CUCUGCUG---------------AAGGAA-CUAGG-CA----------AAAUGGU-ACC-GUAAC--UUCG-GG-AG-AAGGUAC-G-CUGuuga--ugg-u-g--------au-ggga---cuugc---uccc-u---------gagcga-u-uGACAG-CCGC-AGAAA-CCAGGCC-GC-UGCAACU-GUUUAUUAAAAACAUAGCAC-UCUGCAAACACGAA-A------GUG-GA-C-GUAU-AGGGUGUGA-UGCCUGCCCGGU-GCUG-GAAGG-UUAAUUGAUGG-GGUUA-GC-------G-UAA----------------GCGA-AGCUCUUGAUCGAAG-CCCCAGUAAAC-GGC-GGCC-GUAACUAUAACGGU-CCUAAGGUAGCG-AAAUU-CCUU-GUC-GGGUAAGUUCCGACCUGCACGAA-UGGC-AUAAUGA-UGGCGGC-GCUG-UCU-CCAG-CAGAGGCUCAGUGAA-AUC-GAAUU-CG-CCGUG--AA-GAU-G-CGGUGUACCCGCGGC-UAGACGGAAAGACCCCGUGAACCUU-UACUGCAGCUUGACAUUGAACUUUG-ACCUUACUU-GUGUAGGAUAGGUGG-GAGGCUUU-GAA-G------AUG-GGACGCCAGUUCCAUU-GGAGCCAUC-C-UUGAAAUACCACCCU----GG-UAAUGUU-GAGG-UUCUAA-CUC-UG-C----CCCG---UAAUCCGGGGC-GAG-GACCAUGUCUGGUGGG-UAGU-UUGAC-U-GGGGCGGUCUCC-U-CCUAA-AGAGUA-ACGGAGGAGUACGAAG-GUGCGCUCAGCGUGGUCGGAAAUCACGC-GUA---GAGUAUAAAGGCAAAA-GC-GCGCUUAACUGCGAGACCCACAAGUCGAGCAGGUACGAAAGU-AGG-UCUUAGUGAUC-CGGUGGUU-CU-G-UAUGGAAGGGCCAUCGCUCAAC-GGAUAAAAGGUA-CUC-UGGG-G-AU-AACAG-GCUGA--UACCGCCCAAG-A-G-UUC-AUA-UCGACGGCG-GU-GU-UUGGCACCU-CGAUGUCGGCUCAUCUCAUCCUGGGGCUGAAGC---A-GGUC-CC-AAGGGU-AU-GGCU-GUU-CGC--CAUUUA-AAGAGGU-AC-G-CGA-GCUGGGUUUA-GAACGU-CGUGA-GACAGUU-CGG-U-CCCU-AU-CUACCGUGGG-CG-CUGGAAAUUU-GA-G-AGGAUC-UGC--------------UCCUAGUACGAGA-GGACC-AGAGUGGA-CGAACCU--CUGGUGU--ACCGGUUGUGAC-GC-CA-GUCGCA-U-CGC-CGGGUA-GCU-AUGU-U-CGGAAGGGAUAACCGCUGAAAGCAUCUAAGC-GGGAAGCCUA-CCUCAAG-AUAA-GAUUUCCCUA-GGAA------------UUUA---------------------------------------------------------------------------------------------------------UUCC-U-CUA-AAGA-GC-CGUUCAAGACU-AGGACGUU-GAUAGGUU-GG-AUGUG-GAAGCAUA--GUGA---UAUGU-GA-AGCUG-A-CCAAUACUAAUU-GCUCG-UGAG-GCUUGA-CU-AUacaacaccc------------------------------------------------------------------------------------------------------------------------------------------
>Accession:CR543861::SeqID:3325::TaxID:2
--------------------------------------------------------------------------------------------------------------------------------------------------------------------------------------------GUC-AAGU-A-AU----UAA-GUG-CAUG-UG-GUG-GAUG--CCU-UG-GC-AG-UCAG-A-GGC-GAAGAAA-GA--C-GU-GAUAG--CC-U-GC-G-AAAA-GCU-C-CGGG--GAGGC-G-GCAAAUA----UCC--U-GUGAUC-CGGAG-AUG-UC-UGAAUGGGGAAA-CCC--A-CU-UAUC-------------------------------------------------------------------------------------------------------------------------------------------------------------------------------------------------------------------------------------------AUAA-----------GA-UA-GGU-AUUG-C-AUGA--U-----------------------------------------------------------------------------------------------------------------------------------------------------------------------------------------------------------------------------------------------GA-AUA-CA--UA----GUC-AU-G----C-A--A-GG-C-GAACGA-GGG-G-AAGUGAAACAUCU-CA-GUA-CCCUUAG-GAAAAGA-AA-UC-A-A--UU------GA-GAUUCC-CU-UAG-UAGC-GGCG-AGCGA-AAG-GGGA-ACA-GCCC--------------------------------------------------------------------------------------------------------------------------------------------------------------------------------------------------------------------------------------------------au-ua---------------------------------------------aguugug--ug-uguucu--aG-UG-GAAc-g-c-u-c-u-ggga-a-g-ugcg-AACGUAG-AGGG-UGAUAUUCCCGU-A-CAC-gaa-agggca-ca--cacaa-----u---gaug--ac----------------------------------------------------------------------------------GAGUA-GGG-C-GAGG--CAC-GUG-AAACCUU-GU-C-U-GAAUAU--GGG-GGGACCAU--CC-UCC-AAGG-CUAA----AUA-CUCC-UGACUGACC-GAUAGUG-AACC-AGUA-CCGUGA-GG-GA-AAGGCGAAAA-GAACCCC-UGUGA-GGGGA--GUGAAA-UAGAUCCUGAAA-CCGC--AUGCAUACAA-G-C-AGUG-GGA-GC-CG----A----------------------------------------------------------------------------------------------------------------------------------------------------------------------------------------------------------------------------------------------------------------------------------------------------------------------------------------------------------------------------------------------------------------------------------------------------------------------------------------------------------------------------------------------------------------cuugu------------------------------------------------U-CG--G-UGAC-UGCGUACCU-U-UUG-UAUAAUGGGUCAGCGACUU-AU-A-UUC-AGU-AGC----AAGGUUAA-CC--------GCAUA---GG-GG-AGCCGUA--GGGAAA-CCGAG-UCU-UAA---UAGGGCGU----------------------------------------------------------------------------------------------------------------------------------------------------------------------------------------------------------------------------------------------------------------------------------------------------------------------------------------------------auaG-UUGCUGG-GUAUA-GACCCG-AAAC-C-AG-GCGA-UCUAUCCAUGA-GCAGGUUGAA-GGU-UGGGUA-ACAC-UAACU-GGA-GGACCGAACC-CAC-UG-UC--GUUG-AAAAGCCA-GGGG-AUGAC-UUGUGGAUA-G-GGGU--GAAAGGCU-AAUCAAGC-CUGG-UG-AUAGC-UGGUUCU-CCCCG--AAAG-CUAU-UUAG-GUAGCGC-CUCGGA-CGA------A-UA-C--CA-UA-GGGGGUAG-AGC-ACU-GU-UUCGG-C-UA---GG-GGGUC--AUCCCGACUUACCAA-ACCGAU-GCAAACUCCGAA-UA-CCU-A-U-G--AGUAC----U-AUC-C-GGGAGACAGAC--UGCGGGUGCUAACGUCCGU--AGUC-AAGA-GGA-AAACAA-UCCAGACCGCCAGCUAAG-GC-CCCA-AAAUC-AUAG-U-UAA-GUG--------GGAAACGAUGUG-GGA-AGGCAUA--GACA-G-CUAGG-AGG-UUGGCUUAGAAGCAGCCAC--CCUUUAAAGAAAGC-GUAA-UA--------G-CUCAC-UAGU-------CGA------G-U-CGG-CC--UG-CGCGG--AAGAU-GUAA-C-GGGG--CU--AAAACU-AUG-U--GCC-GAA-G-CUGC-GGau--gu-aacu---------uu-a-------------------------------------------------------------------------------------------------------------------------------------------------------------------------------------------------------------------------------------------------------------------------------------------------------------------------------------------------------------------------------------------------------------------------------------------------------------------agu-u-ac--gu-GG-UAGG--GGA-G-----CGUU-CU-G-UAA-------------------------------------------------------------------------------------------------------------------------G-C-CGA-U-GAA-GG-UG-G-A-UU--GAGA----A-GU--C-UG-CUGGAG-GU-AU-CA-GAA-GUGC-GAA-UGC-UGA--CGUG-AGUA--ACG--ACAA-A-ACG-GGUGA-AAA-ACCCG-UU---CGCC-GAA-AGA-C-CA-----------------------------------------------------AGG-GUU-CCA-G-UC-CAACG-UUA-AU-C--GG--GGCUGGGU--GAGU-CGAC-C-CCUAAGGCGAG--GC-C-----GAAA---G-G-C-GU-AGUCG--AUGG-GAAA-UUG-G--UU-AAUAUUC-CAAUAC-uu-c--ug-ugu-aau-----------------------------------------------------------------------------------------------------------------------------gcgau------g-aga--gga-cggag--aagguua--gguc-a---g-cc-ug-g-----cg--u--ugg-u-ug----u-----------------------------------------------------------------------------------------------------------c--c-aggu--ggaa-----------------gaca-g--uaggc--------------------------------------------augcau-cuua-gg-ca-aa---u--cc--g--gggugcucuau---------------------------------------------------------------------------------------------------------------------------------------------gcu--ga--gagucg-auag-c-aa----------------------------------------------------gcu-ag----uu--ua----cuagc------------------------------------g-aag----uggcu--gauacc--aua--c-uu-cc-aagaaa-agucuc--uaagcuaca-----------------------------------------------------------------------------------------------------------------gu-u-aca-ca---gg----aAU-CGUA-CCCGAAACCGACACAGGUGG-UCAGGU-C-GAGUA-GACCAA-GGCGCUUGAG-AGAA-CUCUGCUG---------------AAGGAA-CUAGG-CA----------AAAUGGU-ACC-GUAAC--UUCG-GG-AG-AAGGUAC-G-CUGuuga--ugg-u-g--------au-ggga---cuugc---uccc-u---------gagcga-u-uGACAG-CCGC-AGAAA-CCAGGCC-GC-UGCAACU-GUUUAUUAAAAACAUAGCAC-UCUGCAAACACGAA-A------GUG-GA-C-GUAU-AGGGUGUGA-UGCCUGCCCGGU-GCUG-GAAGG-UUAAUUGAUGG-GGUUA-GC-------G-UAA----------------GCGA-AGCUCUUGAUCGAAG-CCCCAGUAAAC-GGC-GGCC-GUAACUAUAACGGU-CCUAAGGUAGCG-AAAUU-CCUU-GUC-GGGUAAGUUCCGACCUGCACGAA-UGGC-AUAAUGA-UGGCGGC-GCUG-UCU-CCAG-CAGAGGCUCAGUGAA-AUC-GAAUU-CG-CCGUG--AA-GAU-G-CGGUGUACCCGCGGC-UAGACGGAAAGACCCCGUGAACCUU-UACUGCAGCUUGACAUUGAACUUUG-ACCUUACUU-GUGUAGGAUAGGUGG-GAGGCUUU-GAA-G------AUG-GGACGCCAGUUCCAUU-GGAGCCAUC-C-UUGAAAUACCACCCU----GG-UAAUGUU-GAGG-UUCUAA-CUC-UG-C----CCCG---UAAUCCGGGGC-GAG-GACCAUGUCUGGUGGG-UAGU-UUGAC-U-GGGGCGGUCUCC-U-CCUAA-AGAGUA-ACGGAGGAGUACGAAG-GUGCGCUCAGCGUGGUCGGAAAUCACGC-GUA---GAGUAUAAAGGCAAAA-GC-GCGCUUAACUGCGAGACCCACAAGUCGAGCAGGUACGAAAGU-AGG-UCUUAGUGAUC-CGGUGGUU-CU-G-UAUGGAAGGGCCAUCGCUCAAC-GGAUAAAAGGUA-CUC-UGGG-G-AU-AACAG-GCUGA--UACCGCCCAAG-A-G-UUC-AUA-UCGACGGCG-GU-GU-UUGGCACCU-CGAUGUCGGCUCAUCUCAUCCUGGGGCUGAAGC---A-GGUC-CC-AAGGGU-AU-GGCU-GUU-CGC--CAUUUA-AAGAGGU-AC-G-CGA-GCUGGGUUUA-GAACGU-CGUGA-GACAGUU-CGG-U-CCCU-AU-CUACCGUGGG-CG-CUGGAAAUUU-GA-G-AGGAUC-UGC--------------UCCUAGUACGAGA-GGACC-AGAGUGGA-CGAACCU--CUGGUGU--ACCGGUUGUGAC-GC-CA-GUCGCA-U-CGC-CGGGUA-GCU-AUGU-U-CGGAAGGGAUAACCGCUGAAAGCAUCUAAGC-GGGAAGCCUA-CCUCAAG-AUAA-GAUUUCCCUA-GGAA------------UUUA---------------------------------------------------------------------------------------------------------UUCC-U-CUA-AAGA-GC-CGUUCAAGACU-AGGACGUU-GAUAGGUU-GG-AUGUG-GAAGCAUA--GUGA---UAUGU-GA-AGCUG-A-CCAAUACUAAUU-GCUCG-UGAG-GCUUGA-CU-AUacaacaccca-----------------------------------------------------------------------------------------------------------------------------------------
>Accession:CR543861::SeqID:3326::TaxID:2
--------------------------------------------------------------------------------------------------------------------------------------------------------------------------------------------GUC-AAGU-A-AU----UAA-GUG-CAUG-UG-GUG-GAUG--CCU-UG-GC-AG-UCAG-A-GGC-GAAGAAA-GA--C-GU-GAUAG--CC-U-GC-G-AAAA-GCU-C-CGGG--GAGGC-G-GCAAAUA----UCC--U-GUGAUC-CGGAG-AUG-UC-UGAAUGGGGAAA-CCC--A-CU-UAUC-------------------------------------------------------------------------------------------------------------------------------------------------------------------------------------------------------------------------------------------AUAA-----------GA-UA-GGU-AUUG-C-AUGA--U-----------------------------------------------------------------------------------------------------------------------------------------------------------------------------------------------------------------------------------------------GA-AUA-CA--UA----GUC-AU-G----C-A--A-GG-C-GAACGA-GGG-G-AAGUGAAACAUCU-CA-GUA-CCCUUAG-GAAAAGA-AA-UC-A-A--UU------GA-GAUUCC-CU-UAG-UAGC-GGCG-AGCGA-AAG-GGGA-ACA-GCCC--------------------------------------------------------------------------------------------------------------------------------------------------------------------------------------------------------------------------------------------------au-ua---------------------------------------------aguugug--ug-uguucu--aG-UG-GAAc-g-c-u-c-u-ggga-a-g-ugcg-AACGUAG-AGGG-UGAUAUUCCCGU-A-CAC-gaa-agggca-ca--cacaa-----u---gaug--ac----------------------------------------------------------------------------------GAGUA-GGG-C-GAGG--CAC-GUG-AAACCUU-GU-C-U-GAAUAU--GGG-GGGACCAU--CC-UCC-AAGG-CUAA----AUA-CUCC-UGACUGACC-GAUAGUG-AACC-AGUA-CCGUGA-GG-GA-AAGGCGAAAA-GAACCCC-UGUGA-GGGGA--GUGAAA-UAGAUCCUGAAA-CCGC--AUGCAUACAA-G-C-AGUG-GGA-GC-CG----A----------------------------------------------------------------------------------------------------------------------------------------------------------------------------------------------------------------------------------------------------------------------------------------------------------------------------------------------------------------------------------------------------------------------------------------------------------------------------------------------------------------------------------------------------------------cuugu------------------------------------------------U-CG--G-UGAC-UGCGUACCU-U-UUG-UAUAAUGGGUCAGCGACUU-AU-A-UUC-AGU-AGC----AAGGUUAA-CC--------GCAUA---GG-GG-AGCCGUA--GGGAAA-CCGAG-UCU-UAA---UAGGGCGU----------------------------------------------------------------------------------------------------------------------------------------------------------------------------------------------------------------------------------------------------------------------------------------------------------------------------------------------------auaG-UUGCUGG-GUAUA-GACCCG-AAAC-C-AG-GCGA-UCUAUCCAUGA-GCAGGUUGAA-GGU-UGGGUA-ACAC-UAACU-GGA-GGACCGAACC-CAC-UG-UC--GUUG-AAAAGCCA-GGGG-AUGAC-UUGUGGAUA-G-GGGU--GAAAGGCU-AAUCAAGC-CUGG-UG-AUAGC-UGGUUCU-CCCCG--AAAG-CUAU-UUAG-GUAGCGC-CUCGGA-CGA------A-UA-C--CA-UA-GGGGGUAG-AGC-ACU-GU-UUCGG-C-UA---GG-GGGUC--AUCCCGACUUACCAA-ACCGAU-GCAAACUCCGAA-UA-CCU-A-U-G--AGUAC----U-AUC-C-GGGAGACAGAC--UGCGGGUGCUAACGUCCGU--AGUC-AAGA-GGA-AAACAA-UCCAGACCGCCAGCUAAG-GC-CCCA-AAAUC-AUAG-U-UAA-GUG--------GGAAACGAUGUG-GGA-AGGCAUA--GACA-G-CUAGG-AGG-UUGGCUUAGAAGCAGCCAC--CCUUUAAAGAAAGC-GUAA-UA--------G-CUCAC-UAGU-------CGA------G-U-CGG-CC--UG-CGCGG--AAGAU-GUAA-C-GGGG--CU--AAAACU-AUG-U--GCC-GAA-G-CUGC-GGau--gu-aacu---------uu-a-------------------------------------------------------------------------------------------------------------------------------------------------------------------------------------------------------------------------------------------------------------------------------------------------------------------------------------------------------------------------------------------------------------------------------------------------------------------agu-u-ac--gu-GG-UAGG--GGA-G-----CGUU-CU-G-UAA-------------------------------------------------------------------------------------------------------------------------G-C-CGA-U-GAA-GG-UG-G-A-UU--GAGA----A-GU--C-UG-CUGGAG-GU-AU-CA-GAA-GUGC-GAA-UGC-UGA--CGUG-AGUA--ACG--ACAA-A-ACG-GGUGA-AAA-ACCCG-UU---CGCC-GAA-AGA-C-CA-----------------------------------------------------AGG-GUU-CCA-G-UC-CAACG-UUA-AU-C--GG--GGCUGGGU--GAGU-CGAC-C-CCUAAGGCGAG--GC-C-----GAAA---G-G-C-GU-AGUCG--AUGG-GAAA-UUG-G--UU-AAUAUUC-CAAUAC-uu-c--ug-ugu-aau-----------------------------------------------------------------------------------------------------------------------------gcgau------g-aga--gga-cggag--aagguua--gguc-a---g-cc-ug-g-----cg--u--ugg-u-ug----u-----------------------------------------------------------------------------------------------------------c--c-aggu--ggaa-----------------gaca-g--uaggc--------------------------------------------augcau-cuua-gg-ca-aa---u--cc--g--gggugcucuau---------------------------------------------------------------------------------------------------------------------------------------------gcu--ga--gagucg-auag-c-aa----------------------------------------------------gcu-ag----uu--ua----cuagc------------------------------------g-aag----uggcu--gauacc--aua--c-uu-cc-aagaaa-agucuc--uaagcuaca-----------------------------------------------------------------------------------------------------------------gu-u-aca-ca---gg----aAU-CGUA-CCCGAAACCGACACAGGUGG-UCAGGU-C-GAGUA-GACCAA-GGCGCUUGAG-AGAA-CUCUGCUG---------------AAGGAA-CUAGG-CA----------AAAUGGU-ACC-GUAAC--UUCG-GG-AG-AAGGUAC-G-CUGuuga--ugg-u-g--------au-ggga---cuugc---uccc-u---------gagcga-u-uGACAG-CCGC-AGAAA-CCAGGCC-GC-UGCAACU-GUUUAUUAAAAACAUAGCAC-UCUGCAAACACGAA-A------GUG-GA-C-GUAU-AGGGUGUGA-UGCCUGCCCGGU-GCUG-GAAGG-UUAAUUGAUGG-GGUUA-GC-------G-UAA----------------GCGA-AGCUCUUGAUCGAAG-CCCCAGUAAAC-GGC-GGCC-GUAACUAUAACGGU-CCUAAGGUAGCG-AAAUU-CCUU-GUC-GGGUAAGUUCCGACCUGCACGAA-UGGC-AUAAUGA-UGGCGGC-GCUG-UCU-CCAG-CAGAGGCUCAGUGAA-AUC-GAAUU-CG-CCGUG--AA-GAU-G-CGGUGUACCCGCGGC-UAGACGGAAAGACCCCGUGAACCUU-UACUGCAGCUUGACAUUGAACUUUG-ACCUUACUU-GUGUAGGAUAGGUGG-GAGGCUAU-GAA-G------AUG-GGACGCCAGUUCCAUU-GGAGCCAUC-C-UUGAAAUACCACCCU----GG-UAAUGUU-GAGG-UUCUAA-CUC-UG-C----CCCG---UAAUCCGGGGC-GAG-GACCAUGUCUGGUGGG-UAGU-UUGAC-U-GGGGCGGUCUCC-U-CCUAA-AGAGUA-ACGGAGGAGUACGAAG-GUGCGCUCAGCGUGGUCGGAAAUCACGC-GUA---GAGUAUAAAGGCAAAA-GC-GCGCUUAACUGCGAGACCCACAAGUCGAGCAGGUACGAAAGU-AGG-UCUUAGUGAUC-CGGUGGUU-CU-G-UAUGGAAGGGCCAUCGCUCAAC-GGAUAAAAGGUA-CUC-UGGG-G-AU-AACAG-GCUGA--UACCGCCCAAG-A-G-UUC-AUA-UCGACGGCG-GU-GU-UUGGCACCU-CGAUGUCGGCUCAUCUCAUCCUGGGGCUGAAGC---A-GGUC-CC-AAGGGU-AU-GGCU-GUU-CGC--CAUUUA-AAGAGGU-AC-G-CGA-GCUGGGUUUA-GAACGU-CGUGA-GACAGUU-CGG-U-CCCU-AU-CUACCGUGGG-CG-CUGGAAAUUU-GA-G-AGGAUC-UGC--------------UCCUAGUACGAGA-GGACC-AGAGUGGA-CGAACCU--CUGGUGU--ACCGGUUGUGAC-GC-CA-GUCGCA-U-CGC-CGGGUA-GCU-AUGU-U-CGGAAGGGAUAACCGCUGAAAGCAUCUAAGC-GGGAAGCCUA-CCUCAAG-AUAA-GAUUUCCCUA-GGAA------------UUUA---------------------------------------------------------------------------------------------------------UUCC-U-CUA-AAGA-GC-CGUUCAAGACU-AGGACGUU-GAUAGGUU-GG-AUGUG-GAAGCAUA--GUGA---UAUGU-GA-AGCUG-A-CCAAUACUAAUU-GCUCG-UGAG-GCUUGA-CU-AUacaacaccca-----------------------------------------------------------------------------------------------------------------------------------------
>Accession:CR543861::SeqID:3327::TaxID:2
--------------------------------------------------------------------------------------------------------------------------------------------------------------------------------------------GUC-AAGU-A-AU----UAA-GUG-CAUG-UG-GUG-GAUG--CCU-UG-GC-AG-UCAG-A-GGC-GAUGAAA-GA--C-GU-GAUAG--CC-U-GC-G-AAAA-GCU-C-CGGG--GAGGC-G-GCAAAUA----UCC--U-UUGAUC-CGGAG-AUG-UC-UGAAUGGGGAAA-CCC--A-CU-UAUC-------------------------------------------------------------------------------------------------------------------------------------------------------------------------------------------------------------------------------------------AUAA-----------GA-UA-GGU-AUUG-C-AUGA--U-----------------------------------------------------------------------------------------------------------------------------------------------------------------------------------------------------------------------------------------------GA-AUA-CA--UA----GUC-AU-G----C-A--A-GG-C-GAACGA-GGG-G-AAGUGAAACAUCU-CA-GUA-CCCUUAG-GAAAAGA-AA-UC-A-A--UU------GA-GAUUCC-CU-UAG-UAGC-GGCG-AGCGA-AAG-GGGA-ACA-GCCC--------------------------------------------------------------------------------------------------------------------------------------------------------------------------------------------------------------------------------------------------au-ua---------------------------------------------aguugug--ug-uguucu--aG-UG-GAAc-g-c-u-c-u-ggga-a-g-ugcg-AACGUAG-AGGG-UGAUAUUCCCGU-A-CAC-gaa-agggca-ca--cacaa-----u---gaug--ac----------------------------------------------------------------------------------GAGUA-GGG-C-GAGG--CAC-GUG-AAACCUU-GU-C-U-GAAUAU--GGG-GGGACCAU--CC-UCC-AAGG-CUAA----AUA-CUCC-UGACUGACC-GAUAGUG-AACC-AGUA-CCGUGA-GG-GA-AAGGCGAAAA-GAACCCC-UGUGA-GGGGA--GUGAAA-UAGAUCCUGAAA-CCGC--AUGCAUACAA-G-C-AGUG-GGA-GC-CG----A----------------------------------------------------------------------------------------------------------------------------------------------------------------------------------------------------------------------------------------------------------------------------------------------------------------------------------------------------------------------------------------------------------------------------------------------------------------------------------------------------------------------------------------------------------------cuugu------------------------------------------------U-CG--G-UGAC-UGCGUACCU-U-UUG-UAUAAUGGGUCAGCGACUU-AU-A-UUC-AGU-AGC----AAGGUUAA-CC--------GCAUA---GG-GG-AGCCGUA--GGGAAA-CCGAG-UCU-UAA---UAGGGCGU----------------------------------------------------------------------------------------------------------------------------------------------------------------------------------------------------------------------------------------------------------------------------------------------------------------------------------------------------auaG-UUGCUGG-GUAUA-GACCCG-AAAC-C-AG-GCGA-UCUAUCCAUGA-GCAGGUUGAA-GGU-UGGGUA-ACAC-UAACU-GGA-GGACCGAACC-CAC-UG-UC--GUUG-AAAAGCCA-GGGG-AUGAC-UUGUGGAUA-G-GGGU--GAAAGGCU-AAUCAAGC-CUGG-UG-AUAGC-UGGUUCU-CCCCG--AAAG-CUAU-UUAG-GUAGCGC-CUCGGA-CGA------A-UA-C--CA-UA-GGGGGUAG-AGC-ACU-GU-UUCGG-C-UA---GG-GGGUC--AUCCCGACUUACCAA-ACCGAU-GCAAACUCCGAA-UA-CCU-A-U-G--AGUAC----U-AUC-C-GGGAGACAGAC--UGCGGGUGCUAACGUCCGU--AGUC-AAGA-GGA-AAACAA-UCCAGACCGCCAGCUAAG-GC-CCCA-AAAUC-AUAG-U-UAA-GUG--------GGAAACGAUGUG-GGA-AGGCAUA--GACA-G-CUAGG-AGG-UUGGCUUAGAAGCAGCCAC--CCUUUAAAGAAAGC-GUAA-UA--------G-CUCAC-UAGU-------CGA------G-U-CGG-CC--UG-CGCGG--AAGAU-GUAA-C-GGGG--CU--AAAACU-AUG-U--GCC-GAA-G-CUGC-GGau--gu-aacu---------uu-a-------------------------------------------------------------------------------------------------------------------------------------------------------------------------------------------------------------------------------------------------------------------------------------------------------------------------------------------------------------------------------------------------------------------------------------------------------------------agu-u-ac--gu-GG-UAGG--GGA-G-----CGUU-CU-G-UAA-------------------------------------------------------------------------------------------------------------------------G-C-CGA-U-GAA-GG-UG-G-A-UU--GAGA----A-GU--C-UG-CUGGAG-GU-AU-CA-GAA-GUGC-GAA-UGC-UGA--CGUG-AGUA--ACG--ACAA-A-ACG-GGUGA-AAA-ACCCG-UU---CGCC-GAA-AGA-C-CA-----------------------------------------------------AGG-GUU-CCA-G-UC-CAACG-UUA-AU-C--GG--GGCUGGGU--GAGU-CGAC-C-CCUAAGGCGAG--GC-C-----GAAA---G-G-C-GU-AGUCG--AUGG-GAAA-UUG-G--UU-AAUAUUC-CAAUAC-uu-c--ug-ugu-aau-----------------------------------------------------------------------------------------------------------------------------gcgau------g-aga--gga-cggag--aagguua--gguc-a---g-cc-ug-g-----cg--u--ugg-u-ug----u-----------------------------------------------------------------------------------------------------------c--c-aggu--ggaa-----------------gaca-g--uaggc--------------------------------------------augcau-cuua-gg-ca-aa---u--cc--g--gggugcucuau---------------------------------------------------------------------------------------------------------------------------------------------gcu--ga--gagucg-auag-c-aa----------------------------------------------------gcu-ag----uu--ua----cuagc------------------------------------g-aag----uggcu--gauacc--aua--c-uu-cc-aagaaa-agucuc--uaagcuaca-----------------------------------------------------------------------------------------------------------------gu-u-aca-ca---gg----aAU-CGUA-CCCGAAACCGACACAGGUGG-UCAGGU-C-GAGUA-GACCAA-GGCGCUUGAG-AGAA-CUCUGCUG---------------AAGGAA-CUAGG-CA----------AAAUGGU-ACC-GUAAC--UUCG-GG-AG-AAGGUAC-G-CUGuuga--ugg-u-g--------au-ggga---cuugc---uccc-u---------gagcga-u-uGACAG-CCGC-AGAAA-CCAGGCC-GC-UGCAACU-GUUUAUUAAAAACAUAGCAC-UCUGCAAACACGAA-A------GUG-GA-C-GUAU-AGGGUGUGA-UGCCUGCCCGGU-GCUG-GAAGG-UUAAUUGAUGG-GGUUA-GC-------G-UAA----------------GCGA-AGCUCUUGAUCGAAG-CCCCAGUAAAC-GGC-GGCC-GUAACUAUAACGGU-CCUAAGGUAGCG-AAAUU-CCUU-GUC-GGGUAAGUUCCGACCUGCACGAA-UGGC-AUAAUGA-UGGCGGC-GCUG-UCU-CCAG-CAGAGGCUCAGUGAA-AUC-GAAUU-CG-CCGUG--AA-GAU-G-CGGUGUACCCGCGGC-UAGACGGAAAGACCCCGUGAACCUU-UACUGCAGCUUGACAUUGAACUUUG-ACCUUACUU-GUGUAGGAUAGGUGG-GAGGCUUU-GAA-G------AUG-GGACGCCAGUUCCAUU-GGAGCCAUC-C-UUGAAAUACCACCCU----GG-UAAUGUU-GAGG-UUCUAA-CUC-UG-C----CCCG---UAAUCCGGGGC-GAG-GACCAUGUCUGGUGGG-UAGU-UUGAC-U-GGGGCGGUCUCC-U-CCUAA-AGAGUA-ACGGAGGAGUACGAAG-GUGCGCUCAGCGUGGUCGGAAAUCACGC-GUA---GAGUAUAAAGGCAAAA-GC-GCGCUUAACUGCGAGACCCACAAGUCGAGCAGGUACGAAAGU-AGG-UCUUAGUGAUC-CGGUGGUU-CU-G-UAUGGAAGGGCCAUCGCUCAAC-GGAUAAAAGGUA-CUC-UGGG-G-AU-AACAG-GCUGA--UACCGCCCAAG-A-G-UUC-AUA-UCGACGGCG-GU-GU-UUGGCACCU-CGAUGUCGGCUCAUCUCAUCCUGGGGCUGAAGC---A-GGUC-CC-AAGGGU-AU-GGCU-GUU-CGC--CAUUUA-AAGAGGU-AC-G-CGA-GCUGGGUUUA-GAACGU-CGUGA-GACAGUU-CGG-U-CCCU-AU-CUACCGUGGG-CG-CUGGAAAUUU-GA-G-AGGAUC-UGC--------------UCCUAGUACGAGA-GGACC-AGAGUGGA-CGAACCU--CUGGUGU--ACCGGUUGUGAC-GC-CA-GUCGCA-U-CGC-CGGGUA-GCU-AUGU-U-CGGAAGGGAUAACCGCUGAAAGCAUCUAAGC-GGGAAGCCUA-CCUCAAG-AUAA-GAUUUCCCUA-GGAA------------UUUA---------------------------------------------------------------------------------------------------------UUCC-U-CUA-AAGA-GC-CGUUCAAGACU-AGGACGUU-GAUAGGUU-GG-AUGUG-GAAGCAUA--GUGA---UAUGU-GA-AGCUG-A-CCAAUACUAAUU-GCUCG-UGAG-GCUUGA-CU-AUacaacaccca-----------------------------------------------------------------------------------------------------------------------------------------
>Accession:AF516268::SeqID:7016::TaxID:2
------------------------------------------------------------------------------------------------------------------------------------------------------------------------------------guuguauGGUU-AAGU-G-AC----UAA-GCG-UACA-UG-GUG-GAUG--CCU-UG-GC-AG-UCAG-A-GGC-GAUGAAG-GA--C-GU-ACUAA--CC-U-GC-G-AUAA-GCU-G-UGAG--AAGUC-G-GU-AAGA----GAC-GC-UAUUACUCACAG-AUU-UC-CGAAUGGGGAAA-CCC--A-CU-uagc-------------------------------------------------------------------------------------------------------------------------------------------------------------------------------------------------------------------------------------------auaa-----------gc---UAGguaucguugca----U-----------------------------------------------------------------------------------------------------------------------------------------------------------------------------------------------------------------------------------------------GA-AUA-CA--UA----GUG-CA-A----C-G--A-GG-C-GAACCG-GGA-G-AACUGAAACAUCU-AA-GUA-CCCCGAG-GAAAAGA-AA-UC-A-A--CC------GA-GAUUCC-CU-CAG-UAGC-GGCG-AGCGA-ACG-GGGA-UUA-GCCCU---------------------------------------------------------------------------------------------------------------------------------------------------uaaguu-----------------------------------------------------------------------------------------------------------------------------------------------uc-uug-gaaguu--ag-ug-gaau-g-guc-c-u-ggaa-a-g-gcca-GCGAUAC-AGGG-UGAUAGCCCCGU-A-CAU-gaa-aacgac-cu-uga-------------------------------------------------agugaaauc--------------------------------------------GAGUA-GGG-C-GGGA--CAC-GUG-ACAUCCU-GU-C-U-GAAUAU--GGG-GGGACCAU--CC-UCC-AAGG-CUAA----AUA-CUCC-UGACUGACC-GAUAGUG-AACC-AGUA-CCGUGA-GG-GA-AAGGCGAAAA-GAACCCC-UGUGA-GGGGA--GUGAAA-UAGAACCUGAAA-CCGU--GUACGUACAA-G-C-AGUG-GGA-GC-CC----------------------------------------------------------------------------------------------------------------------------------------------------------------------------------------------------------------------------------------------------------------------------------------------------------------------------------------------------------------------------------------------------------------------------------------------------------------------------------------------------------------------------------------------------------------------uucg--------------------------------------------------GG--G-UGAC-UGCGUACCU-U-UUG-UAUAAUGGGUCAGCGACUU-AC-A-UUU-UGU-AGC----GAGGUUAA-CC--------GUAUA---GG-GG-AGCCGUA--GGGAAA-CCGAG-UCU-UAA---CUGGGCGU----------------------------------------------------------------------------------------------------------------------------------------------------------------------------------------------------------------------------------------------------------------------------------------------------------------------------------------------------cuaG-UUGCAAG-GUGUA-GACCCG-AAAC-C-GG-GUGA-UCUAGCCAUGG-GCAGGUUGAA-GGU-UGAGUA-ACAU-CAACU-GGA-GGACCGAACC-CAC-UA-AC--GUUG-CAAAGUUA-GGGG-AUGAC-CUGUGGCUG-G-GGGU--GAAAGGCC-AAUCAAAC-UCGG-AG-AUAGC-UGGUUCU-CCCCG--AAAG-CUAU-UUAG-GUAGCGC-CUCGGA-CGa------A-UA-C--UA-CU-GGGGGUAG-AGC-ACU-GU-UUGGA-C-UA---GG-GGGUC--AUCCCGACUUACCAA-CUCCAU-GCAAACUCCGAA-UA-CCA-G-U-A--AGUAA----U-AUC-C-GGGAGACACAC--GGCGGGUGCUAACGUCCGU--CGUG-AAGA-GGG-AAACAA-CCCAGACCGCCGGCUAAG-GU-CCCA-AAGUU-CUGG-U-UAA-GUG--------GGAAACGAUGUG-GGA-AGGCUCA--GACA-G-CUAGG-AUG-UUGGCUUAGAAGCAGCCAU--CAUUUAAAGAAAGC-GUAA-UA--------G-CUCAC-UAGU-------CGA------G-U-CGG-CC--UG-CGCGG--AAGAU-GUAA-C-GGGG--CU--CAAACC-AGG-C--ACC-GAA-G-CCGC-GGau--uc-ac------------------------------------------------------------------------------------------------------------------------------------------------------------------------------------------------------------------------------------------------------acuuaugu----------------------------------------------------------------------------------------------------------------------------------------------------------------------------------------------------------------------g-u-ga--gu-GG-UAGG--GGA-G-----CGUU-CU-G-UAA-------------------------------------------------------------------------------------------------------------------------G-U-CUG-C-GAA-GG-UG-U-A-UC--GAGA----G-GU--A-UG-CUGGAG-AU-AU-CA-GAA-GUGC-GAA-UGC-UGA--CGUA-AGUA--ACG--AUAA-A-GGG-GGUGA-AAA-GCCUC-CU---CGCC-GGA-AGA-C-CA-----------------------------------------------------AGG-GUU-CCU-G-UC-CAACG-UUA-AU-C--GG--GGCAGGGU--GAGU-CGAC-C-CCUAAGGUGAG--GC-C-----GAAA---G-G-C-GU-AAUCG--AUGG-GAAG-CAG-G--UU-AAUAUUC-CUGCAC-ga-c--uu-gua-auu-----------------------------------------------------------------------------------------------------------------------------gcgau------g-ggg--gga-cggag--aaggcua--ggug-g---g-cc-ag-g-----cg--a--cgg-u-ug----u-----------------------------------------------------------------------------------------------------------c--c-uggu--gaaa-----------------gugc-g--uaggu--------------------------------------------gguguu-ucua-gg-ca-aa---u--cc--g--gagacacaa----------------------------------------------------------------------------------------------------------------------------------------------cacu--ga--gacacg-a-ga-c-gaa---------------------------------------------------ccc-ac---uac--g-----gugcu------------------------------------g-aag----ccauu--gaugcc--cug--c-uu-cc-aggaaa-agccuc--uaagcuuca-----------------------------------------------------------------------------------------------------------------ga-u-uac-aa---gu----cAU-CGUA-CCCCAAACCGACACAGGUGG-UCGGGU-A-GAGAA-UACCAA-GGCGCUUGAG-AGAA-CUCGGGUG---------------AAGGAA-CUAGG-CA----------AAAUAGA-ACC-GUAAC--UUCG-GG-AG-AAGGUUC-G-CUCUUga--cag-u-g--------aa-gucc---cuugc---ggau-g---------gagcag-u-uGGGAG-UCGC-AGUGA-CCAGAUG-GC-UGGGACU-GUUUAUCAAAAACACAGCAC-UCUGCAAACACGAA-A------GUG-GA-C-GUAU-AGGGUGUGA-CACCUGCCCGGU-GCCG-GAAGG-UUAAUUGAUGG-GGUUA-GC-------G-CAA----------------GCGA-AGCUCUUGAUCGAAG-CCCCGGUAAAC-GGC-GGCC-GUAACUAUAACGGU-CCUAAGGUAGCG-AAAUU-CCUU-GUC-GGGUAAGUUCCGACCUGCACGAA-UGGU-GUAACCA-UGGCCAU-GCUG-UCU-CCAC-CCGAGACUCAGUGAA-AUC-GAAUU-CG-CCGUG--AA-GAU-G-CGGUGUACCCGCGGC-UAGACGGAAAGACCCCGUGAACCUU-UACUACAGCUUGGCACUGAACAUUG-AACCUACAU-GUGUAGGAUAGGUGG-GAGGCUUU-GAA-G------GCG-UGACGCCAGUUGCGCU-GGAGCCGAC-C-UUGAAAUACCACCCU----UG-UAUGUUU-GAUG-UUCUAA-CGC-AG-G----GCCC--UGAAUCGGGCUC-GCG-GACAGUGCCUGGUGGG-UAGU-UUGAC-U-GGGGCGGUCUCC-U-CCCAA-AGAGUA-ACGGAGGAGCACGAAG-GUUGGCUAAUCCUGGUCGGACAUCAGGA-GGU---UAGUGCAAUGGCAUAA-GC-CAGCUUAACUGCGAGACGGACAGGUCGAGCAGGUACGAAAGU-AGG-UCAUAGUGAUC-CGGUGGUU-CU-G-AAUGGAAGGGCCAUCGCUCAAC-GGAUAAAAGGUA-CUC-CGGG-G-AU-AACAG-GCUGA--UACCGCCCAAG-A-G-UUC-AUA-UCGACGGCG-GU-GU-UUGGCACCU-CGAUGUCGGCUCAUCACAUCCUGGGGCUGAAGU---C-GGUC-CC-AAGGGU-AU-GGCU-GUU-CGC--CAUUUA-AAGUGGU-AC-G-CGA-GCUGGGUUCA-GAACGU-CGUGA-GACAGUU-CGG-U-CCCU-AU-CUGCCGUGGG-CG-UUGGAUGAUU-GA-A-GGGAGU-UGC--------------UCCUAGUACGAGA-GGACC-GGAGUGAA-CGAACCU--CUGGUGU--UCGGGUUGUCAC-GC-CA-GUGGCA-C-UGC-CCGGUA-GCU-AAGU-U-CGGAAUCGAUAACCGCUGAAAGCAUCUAAGC-GUGAA----------------------------------------------------------------------------------------------------------------------------------------------------------------------------------------------------------------------------------------------------------------------------------------------------------------------------------------------------------------------------------------------------------------------------------------------
>Accession:AF508056::SeqID:7018::TaxID:2
------------------------------------------------------------------------------------------------------------------------------------------------------------------------------------guuguauGGUU-AAGU-G-AC----UAA-GCG-UACA-UG-GUG-GAUG--CCU-UG-GC-AG-UCAG-A-GGC-GAUGAAG-GA--C-GU-ACUAA--CC-U-GC-G-AUAA-GCU-G-UGAG--AAGUC-G-GU-AAGA----GAC-GC-UAUUACUCACAG-AUU-UC-CGAAUGGGGAAA-CCC--A-CC-cagc-------------------------------------------------------------------------------------------------------------------------------------------------------------------------------------------------------------------------------------------acaa-----------gc--uGGG--ua-ucuauuac--U-----------------------------------------------------------------------------------------------------------------------------------------------------------------------------------------------------------------------------------------------GA-AUA-CA--UA----GGU-AA-U----A-G--A-GG-C-GAACCG-GGA-G-AACUGAAACAUCU-AA-GUA-CCCCGAG-GAAAAGA-AA-UC-A-A--CC------GA-GAUUCC-CU-CAG-UAGC-GGCG-AGCGA-ACG-GGGA-UUA-GCCCU---------------------------------------------------------------------------------------------------------------------------------------------------uaaguu-----------------------------------------------------------------------------------------------------------------------------------------------uc-uug-gaaguu--ag-ug-gaau-g-guc-c-u-ggaa-a-g-gcca-GCGAUAC-AGGG-UGAUAGCCCCGU-A-CAU-gaa-aacgac-cu-uga-------------------------------------------------agugaaauc--------------------------------------------GAGUA-GGG-C-GGGA--CAC-GUG-ACAUCCU-GU-C-U-GAAUAU--GGG-GGGACCAU--CC-UCC-AAGG-CUAA----AUA-CUCC-UGACUGACC-GAUAGUG-AACC-AGUA-CCGUGA-GG-GA-AAGGCGAAAA-GAACCCC-UGUGA--GGGA--GUGAAA-UAGAACCUGAAA-CCGU--GUACGUACAA-G-C-AGUG-GGA-GC-CC----------------------------------------------------------------------------------------------------------------------------------------------------------------------------------------------------------------------------------------------------------------------------------------------------------------------------------------------------------------------------------------------------------------------------------------------------------------------------------------------------------------------------------------------------------------------uucg--------------------------------------------------GG--G-UGAC-UGCGUACCU-U-UUG-UAUAAUGGGUCAGCGACUU-AC-A-UUU-UGU-AGC----GAGGUUAA-CC--------GUAUA---GG-GG-AGCCGUA--GGGAAA-CCGAG-UCU-UAA---CUGGGCGU----------------------------------------------------------------------------------------------------------------------------------------------------------------------------------------------------------------------------------------------------------------------------------------------------------------------------------------------------cuaG-UUGCAAG-GUGUA-GACCCG-AAAC-C-GG-GUGA-UCUAGCCAUGG-GCAGGUUGAA-GGU-UGAGUA-ACAU-CAACU-GGA-GGACCGAACC-CAC-UA-AC--GUUG-CAAAGUUA-GGGG-AUGAC-CUGUGGCUG-G-GGGU--GAAAGGCC-AAUCAAAC-UCGG-AG-AUAGC-UGGUUCU-CCCCG--AAAG-CUAU-UUAG-GUAGCGC-CUCGGA-CGa------A-UA-C--UA-CU-GGGGGUAG-AGC-ACU-GU-UUGGA-C-UA---GG-GGGUC--AUCCCGACUUACCAA-CUCCAU-GCAAACUCCGAA-UA-CCA-G-U-A--AGUAA----U-AUC-C-GGGAGACACAC--GGCGGGUGCUAACGUCCGU--CGUG-AAGA-GGG-AAACAA-CCCAGACCGCCGGCUAAG-GU-CCCA-AAGUU-CUGG-U-UAA-GUG--------GGAAACGAUGUG-GGA-AGGCUCA--GACA-G-CUAGG-AUG-UUGGCUUAGAAGCAGCCAU--CAUUUAAAGAAAGC-GUAA-UA--------G-CUCAC-UAGU-------CGA------G-U-CGG-CC--UG-CGCGG--AAGAU-GUAA-C-GGGG--CU--CAAACC-AGG-C--ACC-GAA-G-CCGC-GGau--uc-ac------------------------------------------------------------------------------------------------------------------------------------------------------------------------------------------------------------------------------------------------------acuuaugu----------------------------------------------------------------------------------------------------------------------------------------------------------------------------------------------------------------------g-u-ga--gu-GG-UAGG--GGA-G-----CGUU-CU-G-UAA-------------------------------------------------------------------------------------------------------------------------G-U-CUG-C-GAA-GG-UG-U-A-UC--GAGA----G-GU--A-UG-CUGGAG-AU-AU-CA-GAA-GUGC-GAA-UGC-UGA--CGUA-AGUA--ACG--AUAA-A-GGG-GGUGA-AAA-GCCUC-CU---CGCC-GGA-AGA-C-CA-----------------------------------------------------AGG-GUU-CCU-G-UC-CAACG-UUA-AU-C--GG--GGCAGGGU--GAGU-CGAC-C-CCUAAGGUGAG--GC-C-----GAAA---G-G-C-GU-AAUCG--AUGG-GAAG-CAG-G--UU-AAUAUUC-CUGCAC-ga-c--uu-gua-auu-----------------------------------------------------------------------------------------------------------------------------gcgau------g-ggg--gga-cggag--aaggcua--ggug-g---g-cc-ag-g-----cg--a--cgg-u-ug----u-----------------------------------------------------------------------------------------------------------c--c-uggu--gaaa-----------------gugc-g--uaggu--------------------------------------------gguguu-ucua-gg-ca-aa---u--cc--g--gagacacaa----------------------------------------------------------------------------------------------------------------------------------------------cacu--ga--gacacg-a-ga-c-gaa---------------------------------------------------gcc-ac---uac--g-----guggu------------------------------------g-aag----ccauu--gaugcc--cug--c-uu-cc-aggaaa-agccuc--uaagcuuca-----------------------------------------------------------------------------------------------------------------ga-u-uac-aa---gu----cAU-CGUA-CCCCAAACCGACACAGGUGG-UCGGGU-A-GAGAA-UACCAA-GGCGCUUGAG-AGAA-CUCGGGUG---------------AAGGAA-CUAGG-CA----------AAAUAGA-ACC-GUAAC--UUCG-GG-AG-AAGGUUC-G-CUCUUga--cag-u-g--------aa-gucc---cuugc---ggau-g---------gagcag-u-uGGGAG-UCGC-AGUGA-CCAGAUG-GC-UGGGACU-GUUUAUCAAAAACACAGCAC-UCUGCAAACACGAA-A------GUG-GA-C-GUAU-AGGGUGUGA-CACCUGCCCGGU-GCCG-GAAGG-UUAAUUGAUGG-GGUUA-GC-------G-CAA----------------GCGA-AGCUCUU-AUCGAAG-CCCCGGU-AAC-GGC-GGCC-GUAACUAUAACGGU-CCUAAGGUAGCG-AAAUU-CCUU-GUC-GGGUAAGUUCCGACCUGCACGAA-UGGU-GUAACCA-UGGCCAU-GCUG-UCU-CCAC-CCGAGACUCAGUGAA-AUC-GAAUU-CG-CCGUG--AA-GAU-G-CGGUGUACCCGCGGC-UAGACGGAAAGACCCCGUGAACCUU-UACUACAGCUUGGCACUGAACAUUG-AACCUACAU-GUGUAGGAUAGGUGG-GAGGCUUU-GAA-G------GCG-UGACGCCAGUUGCGCU-GGAGCCGUC-C-UUGAAAUACCACCCU----UG-UAUGUUU-GAUG-UUCUAA-CGC-AG-G----UCCC--UGAAUCGGGAUC-GCG-GACAGUGCCUGGUGGG-UAGU-UUGAC-U-GGGGCGGUCUCC-U-CCCAA-AGAGUA-ACGGAGGAGCACGAAG-GUUGGCUAAUCCUGGUCGGACAUCAGGA-GGU---UAGUGCAAUGGCAUAA-GC-CAGCUUAACUGCGAGACGGACAGGUCGAGCAGGUACGAAAGU-AGG-UCAUAGUGAUC-CGGUGGUU-CU-G-AAUGGAAGGGCCAUCGCUCAAC-GGAUAAAAGGUA-CUC-CGGG-G-AU-AACAG-GCUGA--UACCGCCCAAG-A-G-UUC-AUA-UCGACGGCG-GU-GU-UUGGCACCU-CGAUGUCGGCUCAUCACAUCCUGGGGCUGAAGU---C-GGUC-CC-AAGGGU-AU-GGCU-GUU-CGC--CAUUUA-AAGUGGU-AC-G-CGA-GCUGGGUUCA-GAACGU-CGUGA-GACAGUU-CGG-U-CCCU-AU-CUGCCGUGGG-CG-UUGGAUGAUU-GA-A-GGGAGU-UGC--------------UCCUAGUACGAGA-GGACC-GGAGUGAA-CGAACCU--CUGGUGU--UCGGGUUGUCAC-GC-CA-GUGGCA-C-UGC-CCGGUA-GCU-AAGU-U-CGGAAUCGAUAACCGCUGAA---------------------------------------------------------------------------------------------------------------------------------------------------------------------------------------------------------------------------------------------------------------------------------------------------------------------------------------------------------------------------------------------------------------------------------------------------------------
>Accession:AF516265::SeqID:7025::TaxID:2
------------------------------------------------------------------------------------------------------------------------------------------------------------------------------------guuguauGGUU-AAGU-G-AC----UAA-GCG-UACA-UG-GUG-GAUG--CCU-UG-GC-AG-UCAG-A-GGC-GAUGAAG-GA--C-GU-ACUAA--CC-U-GC-G-AUAA-GCU-G-UGAG--AAGUC-G-GU-AAGA----GAC-GC-UAUUACUCACAG-AUU-UC-CGAAUGGGGAAA-CCC--A-CC-cagc-------------------------------------------------------------------------------------------------------------------------------------------------------------------------------------------------------------------------------------------acaa-----------gc--uGGG--ua-ucuauuac--U-----------------------------------------------------------------------------------------------------------------------------------------------------------------------------------------------------------------------------------------------GA-AUA-CA--UA----GGU-AA-U----A-G--A-GG-C-GAACCG-GGA-G-AACUGAAACAUCU-AA-GUA-CCCCGAG-GAAAAGA-AA-UC-A-A--CC------GA-GAUUCC-CU-UAG-UAGC-GGCG-AGCGA-ACG-GGGA-UUA-GCCCU---------------------------------------------------------------------------------------------------------------------------------------------------uaaguu-----------------------------------------------------------------------------------------------------------------------------------------------uc-uug-gaaguu--ag-ug-gaau-g-guc-c-u-ggaa-a-g-gcca-GCGAUAC-AGGG-UGAUAGCCCCGU-A-CAU-gaa-aacgac-cu-uga-------------------------------------------------agugaaauc--------------------------------------------GAGUA-GGG-C-GGGA--CAC-GUG-ACAUCCU-GU-C-U-GAAUAU--GGG-GGGACCAU--CC-UCC-AAGG-CUAA----AUA-CUCC-UGACUGACC-GAUAGUG-AACC-AGUA-CCGUGA-GG-GA-AAGGCGAAAA-GAACCCC-UGUGA-GGGGA--GUGAAA-UAGAACCUGAAA-CCGU--GUACGUACAA-G-C-AGUG-GGA-GC-CC----------------------------------------------------------------------------------------------------------------------------------------------------------------------------------------------------------------------------------------------------------------------------------------------------------------------------------------------------------------------------------------------------------------------------------------------------------------------------------------------------------------------------------------------------------------------uucg--------------------------------------------------GG--G-UGAC-UGCGUACCU-U-UUG-UAUAAUGGGUCAGCGACUU-AC-A-UUU-UGU-AGC----GAGGUUAA-CC--------GUAUA---GG-GG-AGCCGUA--GGGAAA-CCGAG-UCU-UAA---CUGGGCGU----------------------------------------------------------------------------------------------------------------------------------------------------------------------------------------------------------------------------------------------------------------------------------------------------------------------------------------------------cuaG-UUGCAAG-GUGUA-GACCCG-AAAC-C-GG-GUGA-UCUAGCCAUGG-GCAGGUUGAA-GGU-UGAGUA-ACAU-CAACU-GGA-GGACCGAACC-CAC-UA-AC--GUUG-CAAAGUUA-GGGG-AUGAC-CUGUGGCUG-G-GGGU--GAAAGGCC-AAUCAAAC-UCGG-AG-AUAGC-UGGUUCU-CCCCG--AAAG-CUAU-UUAG-GUAGCGC-CUCGGA-CGa------A-UA-C--UA-CU-GGGGGUAG-AGC-ACU-GU-UUGGA-C-UA---GG-GGGUC--AUCCCGACUUACCAA-CUCCAU-GCAAACUCCGAA-UA-CCA-G-U-A--AGUAA----U-AUC-C-GGGAGACACAC--GGCGGGUGCUACCGUCCGU--CGUG-AAGA-GGG-AAACAA-CCCAGACCGCCGGCUAAG-GU-CCCA-AAGUU-CUGG-U-UAA-GUG--------GGAAACGAUGUG-GGA-AGGCUCA--GACA-G-CUAGG-AUG-UUGGCUUAGAAGCAGCCAU--CAUUUAAAGAAAGC-GUAA-UA--------G-CUCAC-UAGU-------CGA------G-U-CGG-CC--UG-CGCGG--AAGAU-GUAA-C-GGGG--CU--CAAACC-ACG-C--ACC-GAA-G-CCGC-GGau--uc-ac------------------------------------------------------------------------------------------------------------------------------------------------------------------------------------------------------------------------------------------------------acuuaugu----------------------------------------------------------------------------------------------------------------------------------------------------------------------------------------------------------------------g-u-ga--gu-GG-UAGG--GGA-G-----CGUU-CU-G-UAA-------------------------------------------------------------------------------------------------------------------------G-U-CUG-C-GAA-GG-UG-U-A-UC--GAGA----G-GU--A-UG-CUGGAG-AU-AU-CA-GAA-GUGC-GAA-UGC-UGA--CGUA-AGUA--ACG--AUAA-A-GGG-GGUGA-AAA-GCCUC-CU---CGCC-GGA-AGA-C-CA-----------------------------------------------------AGG-GUU-CCU-G-UC-CAACG-UAA-AU-C--GG--GGCAGGGU--GAGU-CGAC-C-CCUAAGGUGAG--GC-C-----GAAA---G-G-C-GU-AAUCG--AUGG-GAAG-CAG-G--UU-AAUAUUC-CUGCAC-ga-c--uu-gua-auu-----------------------------------------------------------------------------------------------------------------------------gcgau------g-ggg--gga-cggag--aaggcua--ggug-g---g-cc-ag-g-----cg--a--cgg-u-ug----u-----------------------------------------------------------------------------------------------------------c--c-uggu--gaaa-----------------gugc-g--uaggu--------------------------------------------gguguu-ucua-gg-ca-aa---u--cc--g--gagauacaa----------------------------------------------------------------------------------------------------------------------------------------------cgcu--ga--gacacg-a-ga-c-gaa---------------------------------------------------gcc-ac---uac--g-----guggu------------------------------------g-gag----ccauu--gaugcc--cug--c-uu-cc-aggaaa-agccuc--uaagcuuca-----------------------------------------------------------------------------------------------------------------ga-u-uac-aa---gu----cAU-CGUA-CCCCAAACCGACACAGGUGG-UCGGGU-A-GAGAA-UACCAA-GGCGCUUGAG-AGAA-CUCGGGUG---------------AAGGAA-CUAGG-CA----------AAAUAGA-ACC-GUAAC--UUCG-GG-AG-AAGGUUC-G-CUCUUga--cag-u-g--------aa-gucc---cuugc---ggau-g---------gagcag-u-uGGGAG-UCGC-AGUGA-CCAGAUG-GC-UGGGACU-GUUUAUCAAAAACACAGCAC-UCUGCAAACACGAA-A------GUG-GA-C-GUAU-AGGGUGUGA-CACCUGCCCGGU-GCCG-GAAGG-UUAAUUGAUGG-GGUUA-GC-------G-CAA----------------GCGA-AGCUCUU-AUCGAAG-CCCCGGU-AAC-GGC-GGCC-GUAACUAUAACGGU-CCUAAGGUAGCG-AAAUU-CCUU-GUC-GGGUAAGUUCCGACCUGCACGAA-UGGU-GUAACCA-UGGCCAU-GCUG-UCU-CCAC-CCGAGACUCAGUGAA-AUC-GAAUU-CG-CCGUG--AA-GAU-G-CGGUGUACCCGCGGC-UAGACGGAAAGACCCCGUGAACCUU-UACUACAGCUUGGCACUGAACAUUG-AACCUACAU-GUGUAGGAUAGGUGG-GAGGCUUU-GAA-G------GCG-UGACGCCAGUUGCGCU-GGAGCCGUC-C-UUGAAAUACCACCCU----UG-UAUGUUU-GAUG-UUCUAA-CGC-AG-G----GCCC--UGAAUCGGGCUC-GCG-GACAGUGCCUGGUGGG-UAGU-UUGAC-U-GGGGCGGUCUCC-U-CCCAA-AGAGUA-ACGGAGGAGCACGAAG-GUUGGCUAAUCCUGGUCGGACAUCAGGA-GGU---UAGUGCAAUGGCAUAA-GC-CAGCUUAACUGCGAGACGGACAGGUCGAGCAGGUACGAAAGU-AGG-UCAUAGUGAUC-CGGUGGUU-CU-G-AAUGGAAGGGCCAUCGCUCAAC-GGAUAAAAGGUA-CUC-CGGG-G-AU-AACAG-GCUGA--UACCGCCCAAG-A-G-UUC-AUA-UCGACGGCG-GU-GU-UUGGCACCU-CGAUGUCGGCUCAUCACAUCCUGGGGCUGAAGU---C-GGUC-CC-AAGGGU-AU-GGCU-GUU-CGC--CAUUUA-AAGUGGU-AC-G-CGA-GCUGGGUUCA-GAACGU-CGUGA-GACAGUU-CGG-U-CCCU-AU-CUGCCGUGGG-CG-UUGGAUGAUU-GA-A-GGGAGU-UGC--------------UCCUAGUACGAGA-GGACC-GGAGUGAA-CGAACCU--CUGGUGU--UCGGGUUGUCAC-GC-CA-GUGGCA-C-UGC-CCGGUA-GCU-AAGU-U-CGGAAUCGAUAACCGCUGAAAGCAUCUAAGC-GUGAA----------------------------------------------------------------------------------------------------------------------------------------------------------------------------------------------------------------------------------------------------------------------------------------------------------------------------------------------------------------------------------------------------------------------------------------------
>Accession:AY138852::SeqID:7027::TaxID:2
------------------------------------------------------------------------------------------------------------------------------------------------------------------------------------guuguauGGUU-AAGU-G-AC----UAA-GCG-UACA-UG-GUG-GAUG--CCU-UG-GC-AG-UCAG-A-GGC-GAUGAAG-GA--C-GU-ACUAA--CC-U-GC-G-AUAA-GCC-G-UGAG--CAGUC-G-GU-AAGA----GAC-AU-UACGACUCACGG-AUU-UC-CGAAUGGGGAAA-CCC--A-CC-cgag-------------------------------------------------------------------------------------------------------------------------------------------------------------------------------------------------------------------------------------------auaa-------cucg------GG--ua-ucuguuac--U-----------------------------------------------------------------------------------------------------------------------------------------------------------------------------------------------------------------------------------------------GA-AUA-CA--UA----GGU-AA-C----A-G--A-GG-C-GAACCG-GGA-G-AACUGAAACAUCU-AA-GUA-CCCCGAG-GAAAAGA-AA-UC-A-A--CC------GA-GAUUCC-CU-CAG-UAGC-GGCG-AGCGA-ACG-GGGA-UUA-GCCCU---------------------------------------------------------------------------------------------------------------------------------------------------ua-----------------------------------------------------------------------------------------------------------------------------------------------agcauc-uug-gaaguu--ag-ug-gaac-g-guc-c-u-ggaa-a-g-gccg-GCGAUAC-AGGG-UGAUAGCCCCGU-A-CAC-gaa-aacaac-cu-ugaugu-----------ga--aa-uc-------------------------------------------------------------------------------GAGUA-GGG-C-GGGA--CAC-GUG-ACAUCCU-GU-C-U-GAAUAU--GGG-GGGACCAU--CC-UCC-AAGG-CUAA----AUA-CUCC-UGACUGACC-GAUAGUG-AACC-AGUA-CCGUGA-GG-GA-AAGGCGAAAA-GAACCCC-UGUGA-GGGGA--GUGAAA-UAGAACCUGAAA-CCGU--GUACGUACAA-G-C-AGUG-GGA-GC-CC----------------------------------------------------------------------------------------------------------------------------------------------------------------------------------------------------------------------------------------------------------------------------------------------------------------------------------------------------------------------------------------------------------------------------------------------------------------------------------------------------------------------------------------------------------------------uucg--------------------------------------------------GG--G-UGAC-UGCGUACCU-U-UUG-UAUAAUGGGUCAGCGACUU-AC-A-UUU-UGU-AGC----GAGGUUAA-CC--------GUAUA---GG-GG-AGCCGUA--GGGAAA-CCGAG-UCU-UAA---CUGGGCGU----------------------------------------------------------------------------------------------------------------------------------------------------------------------------------------------------------------------------------------------------------------------------------------------------------------------------------------------------cuaG-UUGCAAG-GUGUA-GACCCG-AAAC-C-GG-GUGA-UCUAGCCAUGG-GCAGGUUGAA-GGU-UGAGUA-ACAU-CAACU-GGA-GGACCGAACC-CAC-UA-AC--GUUG-CAAAGUUA-GGGG-AUGAC-CUGUGGCUG-G-GGGU--GAAAGGCC-AAUCAAAC-UCGG-AG-AUAGC-UGGUUCU-CCCCG--AAAG-CUAU-UUAG-GUAGCGC-CUCGGA-CGa------A-UA-C--UA-CU-GGGGGUAG-AGC-ACU-GU-UUGGG-C-UA---GG-GGGUC--AUCCCGACUUACCAA-CCCCAU-GCAAACUCCGAA-UA-CCA-G-U-A--AGUAA----U-AUC-C-GGGAGACACAC--GGCGGGUGCUAACGUCCGU--CGUG-AAGA-GGG-AAACAA-CCCAGACCGCCGGCUAAG-GU-CCCA-AAGUU-CUGG-U-UAA-GUG--------GGAAACGAUGUG-GGA-AGGCUCA--GACA-G-CUAGG-AUG-UUGGCUUAGAAGCAGCCAU--CAUUUAAAGAAAGC-GUAA-UA--------G-CUCAC-UAGU-------CGA------G-U-CGG-CC--UG-CGCGG--AAGAU-GUAA-C-GGGG--CU--CAAACC-AGG-C--ACC-GAA-G-CCGC-GGau--uc-acac---------uaa--------------------------------------------------------------------------------------------------------------------------------------------------------------------------------------------------------------------------------------------------------------------------------------------------------------------------------------------------------------------------------------------------------------------------------------------------------------------gug-u-ga--gu-GG-UAGG--GGA-G-----CGUU-CU-G-UAA-------------------------------------------------------------------------------------------------------------------------G-U-CUG-C-GAA-GG-UG-U-G-UC--GAGA----G-GC--A-UG-CUGGAG-AU-AU-CA-GAA-GUGC-GAA-UGC-UGA--CGUA-AGUA--ACG--AUAA-A-GGG-GGUGA-AAA-GCCUC-CU---CGCC-GGA-AGA-C-CA-----------------------------------------------------AGG-GUU-CCU-G-UC-CAACG-UUA-AU-C--GG--GGCAGGGU--GAGU-CGAC-C-CCUAAGGCGAG--GC-C-----GAAA---G-G-C-GU-AAUCG--AUGG-GAAG-CAG-G--UU-AAUAUUC-CUGCAC-ga-c--uu-gua-auu-----------------------------------------------------------------------------------------------------------------------------gcgau------g-ggg--gga-cggag--aaggcua--ggug-g---g-cc-ag-g-----cg--a--cgg-u-ug----u-----------------------------------------------------------------------------------------------------------c--c-uggu--gaaa-----------------gugc-g--uaggc--------------------------------------------gguacc-uuua-gg-ua-aa---u--cc--g--gaggugcaa----------------------------------------------------------------------------------------------------------------------------------------------cgcu--ga--gacacg-a-ga-c-gaa---------------------------------------------------cgc-ac---uac--g-----gugug------------------------------------g-aag----ccauu--gaugcc--cug--c-uu-cc-aggaaa-agccuc--uaagcuuca-----------------------------------------------------------------------------------------------------------------ga-u-uac-aa---gu----cAU-CGUA-CCCCAAACCGACACAGGUGG-UCGGGU-A-GAGAA-UACCAA-GGCGCUUGAG-AGAA-CUCGGGUG---------------AAGGAA-CUAGG-CA----------AAAUAGU-ACC-GUAAC--UUCG-GG-AG-AAGGUAC-G-CUCUUgu--ugg-u-g--------aa-gucc---cuugc---ggau-g---------gagcug-a-cGGGAG-UCGC-AGUGA-CCAGAUG-GC-UGGGACU-GUUUAUCAAAAACACAGCAC-UCUGCAAACACGAA-A------GUG-GA-C-GUAU-AGGGUGUGA-CACCUGCCCGGU-GCCG-GAAGG-UUAAUUGAUGG-GGUUA-GC-------G-CAA----------------GCGA-AGCUCUUGAUCGAAG-CCCCGGUAAAC-GGC-GGCC-GUAACUAUAACGGU-CCUAAGGUAGCG-AAAUU-CCUU-GUC-GGGUAAGUUCCGACCUGCACGAA-UGGU-GUAACCA-UGGCCAU-GCUG-UCU-CCAC-CCGAGACUCAGUGAA-AUC-GAAUU-CG-CCGUG--AA-GAU-G-CGGUGUACCCGCGGC-UAGACGGAAAGACCCCGUGAACCUU-UACUACAGCUUGGCACUGAACAUUG-AACCUACAU-GUGUAGGAUAGGUGG-GAGGCUUU-GAA-G------GCG-UGACGCCAGUUGCGCU-GGAGCCGUC-C-UUGAAAUACCACCCU----UG-UAUGUUU-GAUG-UUCUAA-CGC-AG-G----CCCC--UGAAUCGGGGUC-GCG-GACAGUGCCUGGUGGG-UAGU-UUGAC-U-GGGGCGGUCUCC-U-CCCAA-AGAGUA-ACGGAGGAGCACGAAG-GUUGGCUAAUCCUGGUCGGACAUCAGGA-GGU---UAGUGCAAUGGCAUAA-GC-CAGCUUAACUGCGAGACGGACAGGUCGAGCAGGUACGAAAGU-AGG-UCAUAGUGAUC-CGGUGGUU-CU-G-AAUGGAAGGGCCAUCGCUCAAC-GGAUAAAAGGUA-CUC-CGGG-G-AU-AACAG-GCUGA--UACCGCCCAAG-A-G-UUC-AUA-UCGACGGCG-GU-GU-UUGGCACCU-CGAUGUCGGCUCAUCACAUCCUGGGGCUGAAGU---C-GGUC-CC-AAGGGU-AU-GGCU-GUU-CGC--CAUUUA-AAGUGGU-AC-G-CGA-GCUGGGUUCA-GAACGU-CGUGA-GACAGUU-CGG-U-CCCU-AU-CUGCCGUGGG-CG-UUGGAUGAUU-GA-A-GGGAGU-UGC--------------UCCUAGUACGAGA-GGACC-GGAGUGAA-CGAACCU--CUGGUGU--UCGGGUUGUCAC-GC-CA-GUGGCA-C-UGC-CCGGUA-GCU-AAGU-U-CGGAAUCGAUAACCGCUGAAAGCAUCUAAGC-GUGAA----------------------------------------------------------------------------------------------------------------------------------------------------------------------------------------------------------------------------------------------------------------------------------------------------------------------------------------------------------------------------------------------------------------------------------------------
>Accession:AF508085::SeqID:7032::TaxID:2
------------------------------------------------------------------------------------------------------------------------------------------------------------------------------------guuguauGGUU-AAGU-G-AC----UAA-GCG-UACA-UG-GUG-GAUG--CCU-UG-GC-AG-UCAG-A-GGC-GAUGAAG-GU--A-CU-GCUAA--CC-U-GC-G-AUAA-GCU-G-UGAG--AAGUC-G-GU-AAGA----GAC-GC-UAUUACUCACAG-AUU-UC-CGAAUGGGGAAA-CCC--A-CC-cagc-------------------------------------------------------------------------------------------------------------------------------------------------------------------------------------------------------------------------------------------acaa-----------gc--uGGG--ua-ucguuaaG--U-----------------------------------------------------------------------------------------------------------------------------------------------------------------------------------------------------------------------------------------------GA-AUA-CA--UA----GCU-UA-A----C-G--A-GG-C-GAACCG-GGA-G-AACUGAAACAUCU-AA-GUA-CCCCGAG-GAAAAGA-AA-UC-A-A--CC------GA-GAUUCC-CU-UAG-UAGC-GGCG-AGCGA-ACG-GGGA-UUA-GCCCU---------------------------------------------------------------------------------------------------------------------------------------------------ua-----------------------------------------------------------------------------------------------------------------------------------------------agcauc-uug-gaaguu--ag-ug-gaau-g-guc-c-u-ggaa-a-g-gcca-GCGAUAC-AGGG-UGAUAGCCCCGU-A-CAC-uaa-aacaac-cu------u-----------ga---------------------------------ugugaaauc--------------------------------------------GAGUA-GGG-C-GGGA--CAC-GUG-ACAUCCU-GU-C-U-GAAUAU--GGG-GGGACCAU--CC-UCC-AAGG-CUAA----AUA-CUCC-UGACUGACC-GAUAGUG-AACC-AGUA-CCGUGA-GG-GA-AAGGCGAAAA-GAACCCC-UGUGA-GGGGA--GUGAAA-UAGAACCUGAAA-CCGU--GUACGUACAA-G-C-AGUG-GGA-GC-CC----------------------------------------------------------------------------------------------------------------------------------------------------------------------------------------------------------------------------------------------------------------------------------------------------------------------------------------------------------------------------------------------------------------------------------------------------------------------------------------------------------------------------------------------------------------------uucg--------------------------------------------------GG--G-UGAC-UGCGUACCU-U-UUG-UAUAAUGGGUCAGCGACUU-AC-A-UUU-UGU-AGC----GAGGUUAA-CC--------GUAUA---GG-GG-AGCCGUA--GGGAAA-CCGAG-UCU-UAA---CUGGGCGU----------------------------------------------------------------------------------------------------------------------------------------------------------------------------------------------------------------------------------------------------------------------------------------------------------------------------------------------------cuaG-UUGCAAG-GUGUA-GACCCG-AAAC-C-GG-GUGA-UCUAGCCAUGG-GCAGGUUGAA-GGU-UGAGUA-ACAU-CAACU-GGA-GGACCGAACC-CAC-UA-AC--GUUG-CAAAGUUA-GGGG-AUGAC-CUGUGGCUG-G-GGGU--GAAAGGCC-AAUCAAAC-UCGG-AG-AUAGC-UGGUUCU-CCCCG--AAAG-CUAU-UUAG-GUAGCGC-CUCGGA-CGa------A-UA-C--UA-CU-GGGGGUAG-AGC-ACU-GU-UUGGA-C-UA---UG-GGGUC--AUCCCGACUUACCAA-CUCCAU-GCAAACUCCGAA-UA-CCA-G-U-A--UGUAA----U-AUC-C-GGGAGACACAC--GGCGGGUGCUAACGUCCGU--CGUG-AAGA-GGG-AAACAA-CCCAGACCGCCGGCUAAG-GU-CCCA-AAGUU-CUGG-U-UAA-GUG--------GGAAACGAUGUG-GGA-AGGCUCA--GACA-G-CUAGG-AUG-UUGGCUUAGAAGCAGCCAU--CAUUUAAAGAAAGC-GUAA-UA--------G-CUCAC-UAGU-------CGA------G-U-CGG-CC--UG-CGCGG--AAGAU-GUAA-C-GGGG--CU--CAAACC-AGG-C--ACC-GAA-G-CCGC-GGau--uc-ac------------------------------------------------------------------------------------------------------------------------------------------------------------------------------------------------------------------------------------------------------acuuaugu----------------------------------------------------------------------------------------------------------------------------------------------------------------------------------------------------------------------g-u-ga--gu-GG-UAGG--GGA-G-----CGUU-CU-G-UAA-------------------------------------------------------------------------------------------------------------------------G-U-CUG-C-GAA-GG-UG-U-A-UC--GAGA----G-GU--A-UG-CUGGAG-AU-AU-CA-GAA-GUGC-GAA-UGC-UGA--CGUA-AGUA--ACG--AUAA-A-GGG-GGUGA-AAA-GCCUC-CU---CGCC-GGA-AGA-C-CA-----------------------------------------------------AGG-GUU-CCU-G-UC-CAACG-UUA-AU-C--GG--GGCAGGGU--GAGU-CGAC-C-CCUAAGGUGAG--GC-C-----GAAA---G-G-C-GU-AAUCG--AUGG-GAAG-CAG-G--UU-AAUAUUC-CUGCAC-ga-c--uu-gua-auu-----------------------------------------------------------------------------------------------------------------------------gcgau------g-ggg--gga-cggag--aaggcua--ggug-g---g-cc-ag-g-----cg--a--cgg-u-ug----u-----------------------------------------------------------------------------------------------------------c--c-uggu--gaaa-----------------gugc-g--uaggu--------------------------------------------gguguu-ucua-gg-ca-aa---u--cc--g--gagacacaa----------------------------------------------------------------------------------------------------------------------------------------------cacu--ga--gacacg-a-ga-c-uaa---------------------------------------------------gcc-ac---uac--g-----guggu------------------------------------g-aag----ccauu--gaugcc--cug--c-uu-cc-aggaaa-agccuc--uaagcuuca-----------------------------------------------------------------------------------------------------------------ga-u-uac-aa---gu----cAU-CGUA-CCCCAAACCGACACAGGUGG-UCGGGU-A-GAGAA-UACCAA-GGCGCUUGAG-AGAA-CUCGGGUG---------------AAGGAA-CUAGG-CA----------AAAUAGA-ACC-GUAAC--UUCG-GG-AG-AAGGUUC-G-CUCUUga--cag-u-g--------aa-gucc---cuugc---ggau-g---------gagcag-u-uGGGAG-UCGC-AGUGA-CCAGAUG-GC-UGGGACU-GUUUAUCAAAAACACAGCAC-UCUGCAAACACGAA-A------GUG-GA-C-GUAU-AGGGUGUGA-CACCUGCCCGGU-GCCG-GAAGG-UUAAUUGAUGG-GGUUA-GC-------G-CAA----------------GCGA-AGCUCUU-AUCGAAG-CCCCGGUAAAC-GGC-GGCC-GUAACUAUAACGGU-CCUAAGGUAGCG-AAAUU-CCUU-GUC-GGGUAAGUUCCGACCUGCACGAA-UGGU-GUAACCA-UGGCCAU-GCUG-UCU-CCAC-CCGAGACUCAGUGAA-AUC-GAAUU-CG-CCGUG--AA-GAU-G-CGGUGUACCCGCGGC-UAGACGGAAAGACCCCGUGAACCUU-UACUACAGCUUGGCACUGAACAUUG-AACCUACAU-GUGUAGGAUAGGUGG-GAGGCUUU-GAA-G------GCG-UGACGCUAGUUGCGCU-GGAGCCGUC-C-UUGAAAUACCACCCU----UG-UAUGUUU-GAUG-UUCUAA-CGC-AG-G----GCCC--UGAAUCGGGCUC-GCG-GACAGUGCCUGGUGGG-UAGU-UUGAC-U-GGGGCGGUCUCC-U-CCCAA-AGAGUA-ACGGAGGAGCACGAAG-GUUGGCUAAUCCUGGUCGGACAUCAGGA-GGU---UAGUGCAAUGGCAUAA-GC-CAGCUUAACUGCGAGACUGACAGGUCGAGCAGGUACGAAAGU-AGG-UCAUAGUGAUC-CGGUGGUU-CU-G-AAUGGAAGGGCCAUCGCUCAAC-GGAUAAAAGGUA-CUC-CGGG-G-AU-AACAG-GCUGA--UACCGCCCAAG-A-G-UUC-AUA-UCGACGGCG-GU-GU-UUGGCACCU-CGAUGUCGGCUCAUCACAUCCUGGGGCUGAAGU---C-GGUC-CC-AAGGGU-AU-GGCU-GUU-CGC--CAUUUA-AAGUGGU-AC-G-CGA-GCUGGGUUCA-GAACGU-CGUGA-GACAGUU-CGG-U-CCCU-AU-CUGCCGUGGG-CG-UUGGAUGAUU-GA-A-GGGAGU-UGC--------------UCCUAGUACGAGA-GGACC-GGAGUGAA-CGAACCU--CUGGUGU--UCGGGUUGUCAC-GC-CA-GUGGCA-C-UGC-CCGGUA-GCU-AAGU-U-CGGAAUCGAUAACCGCUGAAAGCAUCUAAGC-GUGAA----------------------------------------------------------------------------------------------------------------------------------------------------------------------------------------------------------------------------------------------------------------------------------------------------------------------------------------------------------------------------------------------------------------------------------------------
>Accession:AF508057::SeqID:7105::TaxID:2
------------------------------------------------------------------------------------------------------------------------------------------------------------------------------------guuguauGGUU-AAGU-G-AC----UAA-GCG-UACA-UG-GUG-GAUG--CCU-UG-GC-AG-UCAG-A-GGC-GAUGAAG-GA--C-GU-ACUAA--CC-U-GC-G-AUAA-GCU-G-UGAG--AAGUC-G-GU-AAGA----GAC-GC-UAUUACUCACAG-AUU-UC-CGAAUGGGGAAA-CCC--A-CC-caag-------------------------------------------------------------------------------------------------------------------------------------------------------------------------------------------------------------------------------------------auaa-------cuug------GG--ua-ucguugca--U-----------------------------------------------------------------------------------------------------------------------------------------------------------------------------------------------------------------------------------------------GA-AUA-CA--UA----GUG-CA-A----C-G--A-GG-C-GAACCG-GGA-G-AACUGAAACAUCU-AA-GUA-CCCCGAG-GAAAAGA-AA-UC-A-A--CC------GA-GAUUCC-CU-CAG-UAGC-GGCG-AGCGA-ACG-GGGA-UUA-GCCCU---------------------------------------------------------------------------------------------------------------------------------------------------uaaguu-----------------------------------------------------------------------------------------------------------------------------------------------uc-uug-gaaguu--aG-UG-GAAU-G-GUC-C-U-GGAA-A-G-GCCa-GCGAUAC-AGGG-UGAUAGCCCCGU-A-CAU-gaa-aacgac-cu-uga-------------------------------------------------agugaaauc--------------------------------------------GAGUA-GGG-C-GGGA--CAC-GUG-ACAUCCU-GU-C-U-GAAUAU--GGG-GGGACCAU--CC-UCC-AAGG-CUAA----AUA-CUCC-UGACUGACC-GAUAGUG-AACC-AGUA-CCGUGA-GG-GA-AAGGCGAAAA-GAACCCC-UGUGA-GGGGA--GUGAAA-UAGAACCUGAAA-CCGU--GUACGUACAA-G-C-AGUG-GGA-GC-CC----------------------------------------------------------------------------------------------------------------------------------------------------------------------------------------------------------------------------------------------------------------------------------------------------------------------------------------------------------------------------------------------------------------------------------------------------------------------------------------------------------------------------------------------------------------------uucg--------------------------------------------------GG--G-UGAC-UGCGUACCU-U-UUG-UAUAAUGGGUCAGCGACUU-AC-A-UUU-UGU-AGC----GAGGUUAA-CC--------GUAUA---GG-GG-AGCCGUA--GGGAAA-CCGAG-UCU-UAA---CUGGGCGU----------------------------------------------------------------------------------------------------------------------------------------------------------------------------------------------------------------------------------------------------------------------------------------------------------------------------------------------------cuaG-UUGCAAG-GUGUA-GACCCG-AAAC-C-GG-GUGA-UCUAGCCAUGG-GCAGGUUGAA-GGU-UGAGUA-ACAU-CAACU-GGA-GGACCGAACC-CAC-UA-AC--GUUG-CAAAGUUA-GGGG-AUGAC-CUGUGGCUG-G-GGGU--GAAAGGCC-AAUCAAAC-UCGG-AG-AUAGC-UGGUUCU-CCCCG--AAAG-CUAU-UUAG-GUAGCGC-CUCGGA-CGa------A-UA-C--UA-CU-GGGGGUAG-AGC-ACU-GU-UUGGA-C-UA---GG-GGGUC--AUCCCGACUUACCAA-CUCCAU-GCAAACUCCGAA-UA-CCA-G-U-A--AGUAA----U-AUC-C-GGGAGACACAC--GGCGGGUGCUAACGUCCGU--CGUG-AAGA-GGG-AAACAA-CCCAGACCGCCGGCUAAG-GU-CCCA-AAGUU-CUGG-U-UAA-GUG--------GGAAACGAUGUG-GGA-AGGCUCA--GACA-G-CUAGG-AUG-UUGGCUUAGAAGCAGCCAU--CAUUUAAAGAAAGC-GUAA-UA--------G-CUCAC-UAGU-------CGA------G-U-CGG-CC--UG-CGCGG--AAGAU-GUAA-C-GGGG--CU--CAAACC-AGG-C--ACC-GAA-G-CCGC-GGau--uc-ac------------------------------------------------------------------------------------------------------------------------------------------------------------------------------------------------------------------------------------------------------acuuaugu----------------------------------------------------------------------------------------------------------------------------------------------------------------------------------------------------------------------g-u-ga--gu-GG-UAGG--GGA-G-----CGUU-CU-G-UAA-------------------------------------------------------------------------------------------------------------------------G-U-CUG-C-GAA-GG-UG-U-A-UC--GAGA----G-GU--A-UG-CUGGAG-AU-AU-CA-GAA-GUGC-GAA-UGC-UGA--CGUA-AGUA--ACG--AUAA-A-GGG-GGUGA-AAA-GCCUC-CU---CGCC-GGA-AGA-C-CA-----------------------------------------------------AGG-GUU-CCU-G-UC-CAACG-UUA-AU-C--GG--GGCAGGGU--GAGU-CGAC-C-CCUAAGGUGAG--GC-C-----GAAA---G-G-C-GU-AAUCG--AUGG-GAAG-CAG-G--UU-AAUAUUC-CUGCAC-ga-c--uu-gua-auu-----------------------------------------------------------------------------------------------------------------------------gcgau------g-ggg--gga-cggag--aaggcua--ggug-g---g-cc-ag-g-----cg--a--cgg-u-ug----u-----------------------------------------------------------------------------------------------------------c--c-uggu--gaaa-----------------gggu-g--uaugu--------------------------------------------gguguu-ucua-gg-ca-aa---u--cc--g--gagacacaa----------------------------------------------------------------------------------------------------------------------------------------------cacu--ga--gacacg-a-ga-c-gaa---------------------------------------------------gcc-ac---uac--g-----guggu------------------------------------g-aag----ccauu--gaugcc--cug--c-uu-cc-aggaaa-agccuc--uaagcuuca-----------------------------------------------------------------------------------------------------------------ga-u-uac-aa---gu----cAU-CGUA-CCCCAAACCGACACAGGUGG-UCGGGU-A-GAGAA-UACCAA-GGCGCUUGAG-AGAA-CUCGGGUG---------------AAGGAA-CUAGG-CA----------AAAUAGA-ACC-GUAAC--UUCG-GG-AG-AAGGUUC-G-CUCUUga--cag-u-g--------aa-gucc---cuugc---ggau-g---------gagcag-u-uGGGAG-UCGC-AGUGA-CCAGAUG-GC-UGGGACU-GUUUAUCAAAAACACAGCAC-UCUGCAAACACGAA-A------GUG-GA-C-GUAU-AGGGUGUGA-CACCUGCCCGGU-GCCG-GAAGG-UUAAUUGAUGG-GGUUA-GC-------G-CAA----------------GCGA-AGCUCUU-AUCGAAG-CCCCGGU-AAC-GGC-GGCC-GUAACUAUAACGGU-CCUAAGGUAGCG-AAAUU-CCUU-GUC-GGGUAAGUUCCGACCUGCACGAA-UGGU-GUAACCA-UGGCCAU-GCUG-UCU-CCAC-CCGAGACUCAGUGAA-AUC-GAAUU-CG-CCGUG--AA-GAU-G-CGGUGUACCCGCGGC-UAGACGGAAAGACCCCGUGAACCUU-UACUACAGCUUGGCACUGAACAUUG-AACCUACAU-GUGUAGGAUAGGUGG-GAGGCUUU-GAA-G------GCG-UGACGCCAGUUGCGCU-GGAGCCGUC-C-UUGAAAUACCACCCU----UG-UAUGUUU-GAUG-UUCUAA-CGC-AG-G----GCCC--UGAAUCGGGCUC-GCG-GACAGUGCCUGGUGGG-UAGU-UUGAC-U-GGGGCGGUCUCC-U-CCCAA-AGAGUA-ACGGAGGAGCACGAAG-GUUGGCUAAUCCUGGUCGGACAUCAGGA-GGU---UAGUGCAAUGGCAUAA-GC-CAGCUUAACUGCGAGACGGACAGGUCGAGCAGGUACGAAAGU-AGG-UCAUAGUGAUC-CGGUGGUU-CU-G-AAUGGAAGGGCCAUCGCUCAAC-GGAUAAAAGGUA-CUC-CGGG-G-AU-AACAG-GCUGA--UACCGCCCAAG-A-G-UUC-AUA-UCGACGGCG-GU-GU-UUGGCACCU-CGAUGUCGGCUCAUCACAUCCUGGGGCUGAAGU---C-GGUC-CC-AAGGGU-AU-GGCU-GUU-CGC--CAUUUA-AAGUGGU-AC-G-CGA-GCUGGGUUCA-GAACGU-CGUGA-GACAGUU-CGG-U-CCCU-AU-CUGCCGUGGG-CG-UUGGAUGAUU-GA-A-GGGAGU-UGC--------------UCCUAGUACGAGA-GGACC-GGAGUGAA-CGAACCU--CUGGUGU--UCGGGUUGUCAC-GC-CA-GUGGCA-C-UGC-CCGGUA-GCU-AAGU-U-CGGAAUCGAUAACCGCUGAA---------------------------------------------------------------------------------------------------------------------------------------------------------------------------------------------------------------------------------------------------------------------------------------------------------------------------------------------------------------------------------------------------------------------------------------------------------------
>Accession:X67946::SeqID:7106::TaxID:2
-------------------------------------------------------------------------------------------------------------------------------------------------------------------------------------------GGUU-AAGU-G-GC----UAA-GCG-UACA-UG-GUG-GAUG--CCU-UG-GC-AG-UCAG-A-GGC-GAUGAAG-GA--C-GU-ACUAA--CC-U-GC-G-AUAA-GCC-G-UGAG--CAGUC-G-GU-AAGA----GAC-AU-UACGAC-CACGG-AUU-UU-CGAAAGGGGAA--UCC--A-CU-UAGC-------------------------------------------------------------------------------------------------------------------------------------------------------------------------------------------------------------------------------------------auaa-----------gc--a-gg--uacg-c-uaCG--U-----------------------------------------------------------------------------------------------------------------------------------------------------------------------------------------------------------------------------------------------GA-AUA-CA--UA----GCG---------a-G--A-GG-C--aAGCG-GGA-G-AACUGAAACAUCU-AA-GU---UUUGAG---AAAGA-A--UC-a-c--cga-----GA-U--UCC--U-CAG-UAGC-GGCG-AGCGAUACG--GGAUUAA-GCCUU----------------------------------------------------------------------------------------------------------------------------------------------------------------------------------------------------------------------------------------------------------------------------------------------------agcauc-uug-ga-gu---aG-UG-GA-C-G-U-U-C-U------G-A-AGCG-GCGAUAC-AGGG-UGAUAGCCCCGU-A-CAC-gaa-aacaac-cu-ugaugu-----------ga--aa-uc-------------------------------------------------------------------------------GAGUA-G---C-GGGA--CAC-GUG-ACAUCCU-GU-C-U-GAAUAUA-CGG-GGGACCAU--CC-UCC-AAGG-CUAA----AUA-CUCC-UGACUGACC-GAUAGUG-AACC-AGUA-CCGUGACGG-GA-AAGGCGAAAA-GAACCCC-UGUGA-GGGGA--GUGAAA-UAGAACCUGAAA-CCGU--GUACGUACAA-G-C-AGUG-GGA-GC-CC----------------------------------------------------------------------------------------------------------------------------------------------------------------------------------------------------------------------------------------------------------------------------------------------------------------------------------------------------------------------------------------------------------------------------------------------------------------------------------------------------------------------------------------------------------------------uucg--------------------------------------------------GG--G-UGAC-UGCGUACCU-U-UUG-UAUAAUGGGUCAGCGACUU-AC-A-UUU-UGU-AGC----GAGGUUAA-CC--------GUAUA---GG-GG-AGCCGUA--GGGAAA-CCGAG-UCU-UAA---CUGGGCGU----------------------------------------------------------------------------------------------------------------------------------------------------------------------------------------------------------------------------------------------------------------------------------------------------------------------------------------------------cuaG-UUGCAAG-GUGUA-GACCCG-AAAC-C-GG-GUGA-UCUAGCCAUGG-GCAGGUUGAA-GGU-UGAGUA-ACAU-CAACU-GGA-GGACCGAACC-CAC-UA-AC--GUUG-CAAGGUUA-GGGG-AUGAC-CUGUGGCUG-G-GGGU--GAAAGGCC-AAUCAAAC-UCGG-AG-AUAGC-UGGUUCU-CCCCG--AAAG-CUAUUUUAG-GUAGCGC-CUCGGA-CGa------A-UA-C--UA-CU-GGGGGUAG-AGC-ACU-GU-UUGGG-C-UA---GG-GGGUC--AUCCCGACUUACCAA-CCCCAU-GCAAACUCCGAA-UA-CCA-G-U-A--AGUAC----U-AUC-C-GGGAGACACAC--GGCGGGUGCUAACGUCCGU--CGUG-AAGA-GGG-AAACAA-CCCAGACCGCCGGCUAAG-GU-CCCA-AAGUU-CUGG-U-UAA-GUG--------GGAAACGAUGUG-GGA-AGGCUCA--GACA-G-CUAGG-AUG-UUGGCUUAGAAGCAGCCAU--CAUUUAAAGAAAGC-GUAA-UA--------G-CUCAC-UAGU-------CGA------G-U-CGG-CC--UG-CGCGG--AAGAU-GUAA-C-GGGG--CU--CAAACC-AGG-C--ACC-GAA-G-CCGC-GGau--uc-acgc---------uaa--------------------------------------------------------------------------------------------------------------------------------------------------------------------------------------------------------------------------------------------------------------------------------------------------------------------------------------------------------------------------------------------------------------------------------------------------------------------gcg-u-ga--gu-GG-UAGG--GGA-G-----CGUU-CU-G-UAA-------------------------------------------------------------------------------------------------------------------------G-U-CUG-C-GAA-GG-UG-U-G-UC--GAGA----G-GC--A-UG-CUGGAG-AU-AU-CA-GAA-GUGC-GAA-UGC-UGA--CGUA-AGUA--ACG--AUAA-A-GGG-GGUGA-AAA-GCCUC-CU---CGCC-GGA-AGA-C-CA-----------------------------------------------------AGG-GUU-CCU-G-UC-CAACG-UUA-AU-C--GG--GGCAGGGU--GAGU-CGAC-C-CCUAAGGCGAG--GC-C-----GAAA---G-G----U-AGUCG--AUGG-GAAG-CAG-G--UU-AAUAUUC-CUGCAC-ga-c--uu-gua-auu-----------------------------------------------------------------------------------------------------------------------------gcgau------g-ggg--gga-cggag--aaggcua--ggug-g---g-cc-ag-g-----cg--a--cgg-u-ug----u-----------------------------------------------------------------------------------------------------------c--c-uggu--gaaa-----------------gugc-g--uaggu--------------------------------------------gguguu-ucua-gg-ca-aa---u--cc--g--gagacacaa----------------------------------------------------------------------------------------------------------------------------------------------cacu--ga--gacacg-a-ga-c-gaa---------------------------------------------------cgc-ac---uac--g-----gugcg------------------------------------g-aag----ccauu--gaugcc--cug--c-uu-cc-aggaaa-agccuc--uaagcuuca-----------------------------------------------------------------------------------------------------------------ga-u-uac-aa---gu----cAU-CGUA-CCCCAAACCGACACAGGUGG-UCGGGU-A-GAGAA-UACCAA-GGCGCUUGAG-AGAA-CUCGGGUGaagggaacuaaagagAAGGAA-CUAGG-CA----------AAAUAGA-ACC-GUAAC--UUCG-GG-AG-AAGGUUC-G-CUCUUga--cag-u-g--------aa-gucc---cuugc---ggau-g---------gagcag-u-uGGGAG-UCGC-AGUGA-CCAGAUG-GC-UGGGACU-GUUUAUCAAAAACACAGCAC-UCUGCAAACACGAA-A------GUG-GA-C-GUAU-AGGGUGUGA-CACCUGCCCGGU-GCCG-GAAGG-UUAAUUGAUGG-GGUUA-GC-------G-CAA----------------GCGA-AGCUCUUGAUCGAAG-CCCCGGUAAAC-GGC-GGCC-GUAACUAUAACGGU-CCUAAGGUAGCG-AAAUU-CCUU-GUC-GGGUAAGUUCCGACCUGCACGAA-UGGU-GUAACCA-UGGCCAU-GCUG-UCU-CCAC-CCGAGACUCAGUGAA-AUC-GAAUU-CG-CCGUG--AA-GAU-G-CGGUGUACCCGCGGC-UAGACGGAAAGACCCCGUGAACCUU-UACUACAGCUUGGCACUGAACAUUG-AACCUACAU-GUGUAGGAUAGGUGG-GAGGCUUU-GAAGG------GCGUGAACGCCAGUUUCGCU-GGAGCCGUC-C-UUGAAAUACCACCCU----UG-UAUGUUU-GAUG-UUCUAA-CGC-AG-G----CCCG--UGAAUCCGGGUC-GCG-GACAGUGCCUGGUGGG-UAGU-UUGAC-U-GGGGCGGUCUCC-U-CCCAA-AGAGUA-ACGGAGGAGCACGAAG-GUUGGCUAAUCCUGGUCGGACAUCAGGA-GGU---UAGUGCAAUGGCAUAA-GC-CAGCUUAACUGCGAGACGGACAGGUCGAGCAGGUACGAAAGU-AGG-UCAUAGUGAUC-CGGUGGUU-CU-G-AAUGGAAGGGCCAUCGCUCAAC-GGAUAAAAGGUA-CUC-CGGG-G-AU-AACAG-GCUGA--UACCGCCCAAG-A-G-UUC-AUA-UCGACGGCG-GU-GU-UUGGCACCU-CGAUGUCGGCUCAUCACAUCCUGGGGCUGAAGU---C-GGUC-CC-AAGGGU-AU-GGCU-GUU-CGC--CAUUUA-AAGUGGU-AC-G-CGA-GCUGGGUUCA-GAACGU-CGUGA-GACAGUU-CGG-U-CCCU-AU-CUGCCGUGGG-CG-UUGGAUGAUU-GA-A-GGGAGU-UGC--------------UCCUAGUACGAGA-GGACC-GGAGUGAA-CGAGCCU--CUGGUGU--UCGGGUUGUCAC-GC-CA-GUGGCA-C-UGC-CCGGUA-GCU-AAGU-U-CGGAAUCGAUAACCGCUGAAAGCAUCUAAGC-GUGAAAnnnn-nnnnnnn-nnnn-nnnnnnnnnn-nnnnn------------nnn--------------------------------------------------------------------------------------------------------nnnnn-n-nnn-nnnn-nn-nnnnnnnnnnn-nnnnnnnn-nnnnnnnn-nn-nnnnn-nnnnnnnn--nnnn---nnnnn-nn-nnnnn-n-nnnnnnnnnnnn-nnnnn-nnnn-nnnnnn-nn-nn---------------------------------------------------------------------------------------------------------------------------------------------------
>Accession:AY138849::SeqID:7107::TaxID:2
------------------------------------------------------------------------------------------------------------------------------------------------------------------------------------guuguauGGUU-AAGU-G-AC----UAA-GCG-UACA-UG-GUG-GAUG--CCU-UG-GC-AG-UCAG-A-GGC-GAUGAAG-GA--C-GU-ACUAA--CC-U-GC-G-AUAA-GCC-G-UGAG--CAGUC-G-GU-AAGA----GAC-AU-UACGACUCACGG-AUU-UC-CGAAUGGGGAAA-CCC--A-cu-UAGC-------------------------------------------------------------------------------------------------------------------------------------------------------------------------------------------------------------------------------------------auaa-----------gc---UAGguaucgu--uaCG--U-----------------------------------------------------------------------------------------------------------------------------------------------------------------------------------------------------------------------------------------------GA-AUA-CA--UA----GCG-UA-G----C-G--A-GG-C-GAACCG-GGA-G-AACUGAAACAUCU-AA-GUA-CCCCGAG-GAAAAGA-AA-UC-A-A--CC------GA-GAUUCC-CU-CAG-UAGC-GGCG-AGCGA-ACG-GGGA-UUA-GCCCU---------------------------------------------------------------------------------------------------------------------------------------------------ua-----------------------------------------------------------------------------------------------------------------------------------------------agcauc-uug-gaaguu--aG-UG-GAAC-G-GUC-C-U-GGAA-A-G-GCCG-GCGAUAC-AGGG-UGAUAGCCCCGU-A-CAC-gaa-aacaac-cu-ugaugu-----------ga--aa-uc-------------------------------------------------------------------------------GAGUA-GGG-C-GGGA--CAC-GUG-ACAUCCU-GU-C-U-GAAUAU--GGG-GGGACCAU--CC-UCC-AAGG-CUAA----AUA-CUCC-UGACUGACC-GAUAGUG-AACC-AGUA-CCGUGA-GG-GA-AAGGCGAAAA-GAACCCC-UGUGA-GGGGA--GUGAAA-UAGAACCUGAAA-CCGU--GUACGUACAA-G-C-AGUG-GGA-GC-CC----------------------------------------------------------------------------------------------------------------------------------------------------------------------------------------------------------------------------------------------------------------------------------------------------------------------------------------------------------------------------------------------------------------------------------------------------------------------------------------------------------------------------------------------------------------------uucg--------------------------------------------------GG--G-UGAC-UGCGUACCU-U-UUG-UAUAAUGGGUCAGCGACUU-AC-A-UUU-UGU-AGC----GAGGUUAA-CC--------GUAUA---GG-GG-AGCCGUA--GGGAAA-CCGAG-UCU-UAA---CUGGGCGU----------------------------------------------------------------------------------------------------------------------------------------------------------------------------------------------------------------------------------------------------------------------------------------------------------------------------------------------------cuaG-UUGCAAG-GUGUA-GACCCG-AAAC-C-GG-GUGA-UCUAGCCAUGG-GCAGGUUGAA-GGU-UGAGUA-ACAU-CAACU-GGA-GGACCGAACC-CAC-UA-AC--GUUG-CAAAGUUA-GGGG-AUGAC-CUGUGGCUG-G-GGGU--GAAAGGCC-AAUCAAAC-UCGG-AG-AUAGC-UGGUUCU-CCCCG--AAAG-CUAU-UUAG-GUAGCGC-CUCGGA-CGa------A-UA-C--UA-CU-GGGGGUAG-AGC-ACU-GU-UUGGG-C-UA---GG-GGGUC--AUCCCGACUUACCAA-CCCCAU-GCAAACUCCGAA-UA-CCA-G-U-A--AGUAC----U-AUC-C-GGGAGACACAC--GGCGGGUGCUAACGUCCGU--CGUG-AAGA-GGG-AAACAA-CCCAGACCGCCGGCUAAG-GU-CCCA-AAGUU-CUGG-U-UAA-GUG--------GGAAACGAUGUG-GGA-AGGCUCA--GACA-G-CUAGG-AUG-UUGGCUUAGAAGCAGCCAU--CAUUUAAAGAAAGC-GUAA-UA--------G-CUCAC-UAGU-------CGA------G-U-CGG-CC--UG-CGCGG--AAGAU-GUAA-C-GGGG--CU--CAAACC-AGG-C--ACC-GAA-G-CCGC-GGau--uc-acac---------uaa--------------------------------------------------------------------------------------------------------------------------------------------------------------------------------------------------------------------------------------------------------------------------------------------------------------------------------------------------------------------------------------------------------------------------------------------------------------------gcg-u-ga--gu-GG-UAGG--GGA-G-----CGUU-CU-G-UAA-------------------------------------------------------------------------------------------------------------------------G-U-CUG-C-GAA-GG-UG-U-G-UC--GAGA----G-GC--A-UG-CUGGAG-AU-AU-CA-GAA-GUGC-GAA-UGC-UGA--CGUA-AGUA--ACG--AUAA-A-GGG-GGUGA-AAA-GCCUC-CU---CGCC-GGA-AGA-C-CA-----------------------------------------------------AGG-GUU-CCU-G-UC-CAACG-UUA-AU-C--GG--GGCAGGGU--GAGU-CGAC-C-CCUAAGGCGAG--GC-C-----GAAA---G-G-C-GU-AGUCG--AUGG-GAAG-CAG-G--UU-AAUAUUC-CUGCAC-ga-c--uu-gua-auu-----------------------------------------------------------------------------------------------------------------------------gcgau------g-ggg--gga-cggag--aaggcua--ggug-g---g-cc-ag-g-----cg--a--cgg-u-ug----u-----------------------------------------------------------------------------------------------------------c--c-uggu--gaaa-----------------gugc-g--uaggu--------------------------------------------gguguu-ucua-gg-ca-aa---u--cc--g--gagacacaa----------------------------------------------------------------------------------------------------------------------------------------------cacu--ga--gacacg-a-ga-c-gaa---------------------------------------------------cgc-ac---uac--g-----gugcg------------------------------------g-aag----ccauu--gaugcc--cug--c-uu-cc-aggaaa-agccuc--uaagcuuca-----------------------------------------------------------------------------------------------------------------ga-u-uac-aa---gu----cAU-CGUA-CCCCAAACCGACACAGGUGG-UCGGGU-A-GAGAA-UACCAA-GGCGCUUGAG-AGAA-CUCGGGUG---------------AAGGAA-CUAGG-CA----------AAAUAGA-ACC-GUAAC--UUCG-GG-AG-AAGGUUC-G-CUCUUga--cag-u-g--------aa-gucc---cuugc---ggau-g---------gagcag-u-uGGGAG-UCGC-AGUGA-CCAGAUG-GC-UGGGACU-GUUUAUCAAAAACACAGCAC-UCUGCAAACACGAA-A------GUG-GA-C-GUAU-AGGGUGUGA-CACCUGCCCGGU-GCCG-GAAGG-UUAAUUGAUGG-GGUUA-GC-------G-CAA----------------GCGA-AGCUCUUGAUCGAAG-CCCCGGUAAAC-GGC-GGCC-GUAACUAUAACGGU-CCUAAGGUAGCG-AAAUU-CCUU-GUC-GGGUAAGUUCCGACCUGCACGAA-UGGU-GUAACCA-UGGCCAU-GCUG-UCU-CCAC-CCGAGACUCAGUGAA-AUC-GAAUU-CG-CCGUG--AA-GAU-G-CGGUGUACCCGCGGC-UAGACGGAAAGACCCCGUGAACCUU-UACUACAGCUUGGCACUGAACAUUG-AACCUACAU-GUGUAGGAUAGGUGG-GAGGCUUU-GAA-G------GCG-UGACGCCAGUUGCGCU-GGAGCCGUC-C-UUGAAAUACCACCCU----UG-UAUGUUU-GAUG-UUCUAA-CGC-AG-G----CCCC--UGAAUCGGGGUC-GCG-GACAGUGCCUGGUGGG-UAGU-UUGAC-U-GGGGCGGUCUCC-U-CCCAA-AGAGUA-ACGGAGGAGCACGAAG-GUUGGCUAAUCCUGGUCGGACAUCAGGA-GGU---UAGUGCAAUGGCAUAA-GC-CAGCUUAACUGCGAGACGGACAGGUCGAGCAGGUACGAAAGU-AGG-UCAUAGUGAUC-CGGUGGUU-CU-G-AAUGGAAGGGCCAUCGCUCAAC-GGAUAAAAGGUA-CUC-CGGG-G-AU-AACAG-GCUGA--UACCGCCCAAG-A-G-UUC-AUA-UCGACGGCG-GU-GU-UUGGCACCU-CGAUGUCGGCUCAUCACAUCCUGGGGCUGAAGU---C-GGUC-CC-AAGGGU-AU-GGCU-GUU-CGC--CAUUUA-AAGUGGU-AC-G-CGA-GCUGGGUUCA-GAACGU-CGUGA-GACAGUU-CGG-U-CCCU-AU-CUGCCGUGGG-CG-UUGGAUGAUU-GA-A-GGGAGU-UGC--------------UCCUAGUACGAGA-GGACC-GGAGUGAA-CGAACCU--CUGGUGU--UCGGGUUGUCAC-GC-CA-GUGGCA-C-UGC-CCGGUA-GCU-AAGU-U-CGGAAUCGAUAACCGCUGAAAGCAUCUAAGC-GUGAA----------------------------------------------------------------------------------------------------------------------------------------------------------------------------------------------------------------------------------------------------------------------------------------------------------------------------------------------------------------------------------------------------------------------------------------------
>Accession:X87281::SeqID:7108::TaxID:2
------------------------------------------------------------------------------------------------------------------------------------------------------------------------------------guuguauGGUU-AAGU-G-AC----UAA-GCG-UACA-UG-GUG-GAUG--CCU-UG-GC-AG-UCAG-A-GGC-GAUGAAG-GA--C-GU-ACUAA--CC-U-GC-G-AUAA-GCC-G-UGAG--CAGUC-G-GU-AAGA----GAC-AU-UACGACUCACGG-AUU-UC-CGAAUGGGGAAA-CCC--A-CU-UAGC-------------------------------------------------------------------------------------------------------------------------------------------------------------------------------------------------------------------------------------------AUAA-----------GC-UA-GGU-AUCG-C-UACG--U-----------------------------------------------------------------------------------------------------------------------------------------------------------------------------------------------------------------------------------------------GA-AUA-CA--UA----GCG-UA-G----C-G--A-GG-C-GAACCG-GGA-G-AACUGAAACAUCU-AA-GUA-CCCCGAG-GAAAAGA-AA-UC-A-A--CC------GA-GAUUCC-CU-CAG-UAGC-GGCG-AGCGA-ACG-GGGA-UUA-GCCCU--------------------------------------------------------------------------------------------------------------------------------------------------------------------------------------------------------------------------------------------------u-ga-----------------------------------------------gcauc-uug-gaaguu--aG-UG-GAAC-G-GUC-C-U-GGAA-A-G-GCCG-GCGAUAC-AGGG-UGAUAGCCCCGU-A-CAC-gaa-aacaac-cu-ugaugu-----------ga--aa-uc-------------------------------------------------------------------------------GAGUA-GGG-C-GGGA--CAC-GUG-ACAUCCU-GU-C-U-GAAUAU--GGG-GGGACCAU--CC-UCC-AAGG-CUAA----AUA-CUCC-UGACUGACC-GAUAGUG-AACC-AGUA-CCGUGA-GG-GA-AAGGCGAAAA-GAACCCC-UGUGA-GGGGA--GUGAAA-UAGNACCUGAAA-CCGU--GUACGUACAA-G-C-AGUG-GGA-GC-CU----UC----------------------------------------------------------------------------------------------------------------------------------------------------------------------------------------------------------------------------------------------------------------------------------------------------------------------------------------------------------------------------------------------------------------------------------------------------------------------------------------------------------------------------------------------------------------gggg--------------------------------------------------------UGAC-UGCGUACCU-U-UUG-UAUAAUGGGUCAGCGACUU-AC-A-UUU-UGU-AGC----GAGGUUAA-CC--------GUAUA---GG-GG-AGCCGUA--GGGAAA-CCGAG-UCU-UAA---CUGGGCGU----------------------------------------------------------------------------------------------------------------------------------------------------------------------------------------------------------------------------------------------------------------------------------------------------------------------------------------------------cuaG-UUGCAAG-GUGUA-GACCCG-AAAC-C-GG-GUGA-UCUAGCCAUGG-GCAGGUUGAA-GGU-UGAGUA-ACAU-CAACU-GGA-GGACCGAACC-CAC-UA-AC--GUUG-CAAAGUUA-GGGG-AUGAC-CUGUGGCUG-G-GGGU--GAAAGGCC-AAUCAAAC-UCGG-AG-AUAGC-UGGUUCU-CCCCG--AAAG-CUAU-UUAG-GUAGCGC-CUCGGA-CGA------A-UA-C--UA-CU-GGGGGUAG-AGC-ACU-GU-UUGGG-C-UA---GG-GGGUC--AUCCCGACUUACCAA-CCCCAU-GCAAACUCCGAA-UA-CCA-G-U-A--AGUAC----U-AUC-C-GGGAGACACAC--GGCGGGUGCUAACGUCCGU--CGUG-AAGA-GGG-AAACAA-CCCAGACCGCCGGCUAAG-GU-CCCA-AAGUU-CUGG-U-UAA-GUG--------GGAAACGAUGUG-GGA-AGGCUCA--GACA-G-CUAGG-AUG-UUGGCUUAGAAGCAGCCAU--CAUUUAAAGAAAGC-GUAA-UA--------G-CUCAC-UAGU-------CGA------G-U-CGG-CC--UG-CGCGG--AAGAU-GUAA-C-GGGG--CU--CAAACC-AGG-C--ACC-GAA-G-CUGC-GGau--uc-acgc---------uaa--------------------------------------------------------------------------------------------------------------------------------------------------------------------------------------------------------------------------------------------------------------------------------------------------------------------------------------------------------------------------------------------------------------------------------------------------------------------gcg-u-ga--gu-GG-UAGG--GGA-G-----CGUU-CU-G-UAA-------------------------------------------------------------------------------------------------------------------------G-U-CUG-C-GAA-GG-UG-U-A-UC--GAGA----G-GU--A-UG-CUGGAG-AU-AU-CA-GAA-GUGC-GAA-UGC-UGA--CGUA-AGUA--ACG--AUAA-A-GGG-GGUGA-AAA-GCCUC-CU---CGCC-GGA-AGA-C-CA-----------------------------------------------------AGG-GUU-CCU-G-UC-CAACG-UUA-AU-C--GG--GGCAGGGU--GAGU-CGAC-C-CCUAAGGUGAG--GC-C-----GAAA---G-G-C-GU-AGUCG--AUGG-GAAG-CAG-G--UU-AAUAUUC-CUGCAC-ga-c--uu-gua-auu-----------------------------------------------------------------------------------------------------------------------------gcgau------g-ggg--gga-cggag--aaggcua--ggug-g---g-cc-ag-g-----cg--a--cgg-u-ug----u-----------------------------------------------------------------------------------------------------------c--c-uggu--gaaa-----------------gugc-g--uaggu--------------------------------------------gguguu-ucua-gg-ca-aa---u--cc--g--gagacacaa----------------------------------------------------------------------------------------------------------------------------------------------cacu--ga--gacacg-a-ga-c-gaa---------------------------------------------------cgc-ac---uac--g-----gugcg------------------------------------g-aag----ccauu--gaugcc--cug--c-uu-cc-aggaaa-agccuc--uaagcuuca-----------------------------------------------------------------------------------------------------------------ga-u-uac-aa---gu----cAU-CGUA-CCCCAAACCGACACAGGUGG-UCGGGU-A-GAGAA-UACCAA-GGCGCUUGAG-AGAA-CUCGGGUG---------------AAGGAA-CUAGG-CA----------AAAUAGA-ACC-GUAAC--UUCG-GG-AG-AAGGUUC-G-CUCUUga--ugg-u-g--------aa-gucc---cuugc---ggau-g---------gagcug-u-cGGGAG-UCGC-AGUGA-CCAGAUG-GC-UGGGACU-GUUUAUCAAAAACACAGCAC-UCUGCAAACACGAA-A------GUG-GA-C-GUAU-AGGGUGUGA-CACCUGCCCGGU-GCCG-GAAGG-UUAAUUGAUGG-GGUUA-GC-------G-CAA----------------GCGA-AGCUCUUGAUCGAAG-CCCCGGUAAAC-GGC-GGCC-GUAACUAUAACGGU-CCUAAGGUAGCG-AAAUU-CCUU-GUC-GGGUAAGUUCCGACCUGCACGAA-UGGU-GUAACCA-UGGCCAU-GCUG-UCU-CCAC-CCGAGACUCAGUGAA-AUC-GAAUU-CG-CCGUG--AA-GAU-G-CGGUGUACCCGCGGC-UAGACGGAAAGACCCCGUGAACCUU-UACUACAGCUUGGCACUGAACAUUG-AACCUACAU-GUGUAGGAUAGGUGG-GAGGCUUU-GAA-G------GCG-UGACGCCAGUUGCGCU-GGAGCCGUC-C-UUGAAAUACCACCCU----UG-UAUGUUU-GAUG-UUCUAA-CGC-AG-G----GCCC--UGAAUCGGGCUC-GCG-GACAGUGCCUGGUGGG-UAGU-UUGAC-U-GGGGCGGUCUCC-U-CCCAA-AGAGUA-ACGGAGGAGCACGAAG-GUUGGCUAAUCCUGGUCGGACAUCAGGA-GGU---UAGUGCAAUGGCAUAA-GC-CAGCUUAACUGCGAGACGGACAGGUCGAGCAGGUACGAAAGU-AGG-UCAUAGUGAUC-CGGUGGUU-CU-G-AAUGGAAGGGCCAUCGCUCAAC-GGAUAAAAGGUA-CUC-CGGG-G-AU-AACAG-GCUGA--UACCGCCCAAG-A-G-UUC-AUA-UCGACGGCG-GU-GU-UUGGCACCU-CGAUGUCGGCUCAUCACAUCCUGGGGCUGAAGU---C-GGUC-CC-AAGGGU-AU-GGCU-GUU-CGC--CAUUUA-AAGUGGU-AC-G-CGA-GCUGGGUUCA-GAACGU-CGUGA-GACAGUU-CGG-U-CCCU-AU-CUGCCGUGGG-CG-UUGGAUGAUU-GA-A-GGGAGU-UGC--------------UCCUAGUACGAGA-GGACC-GGAGUGAA-CGAACCU--CUGGUGU--UCGGGUUGUCAC-GC-CA-GUGGCA-C-UGC-CCGGUA-GCU-AAGU-U-CGGCCUCGAUAACCGCUGAAAGCAUCUAAGC-GGGAAGCGAG-CCCUGAG-AUGA-GUCAUCCCUG-ACCCC------------UUG--------------------------------------------------------------------------------------------------------AGGGU-C-CUA-AAGG-GC-CGUUGGAGACC-ACAACGUU-GAUAGGUG-GG-GUGUG-UAAGCGUA--GCGA---UACGU-UG-AGCUA-A-CCCAUACUAAUU-ACCCG-UGAG-GCUUAA-CC-AU---------------------------------------------------------------------------------------------------------------------------------------------------
>Accession:AY138850::SeqID:7112::TaxID:2
------------------------------------------------------------------------------------------------------------------------------------------------------------------------------------guuguauGGUU-AAGU-G-AC----UAA-GCG-UACA-UG-GUG-GAUG--CCU-UG-GC-AG-UCAG-A-GGC-GAUGAAG-GA--C-GU-ACUAA--CC-U-GC-G-AUAA-GCU-G-UGAG--AAGUC-G-GU-AAGA----GAC-GC-UAUUACUCACAG-AUU-UC-CGAAUGGGGAAA-CCC--A-CC-caag-------------------------------------------------------------------------------------------------------------------------------------------------------------------------------------------------------------------------------------------auaa-------cuug------GG--ua-ucguuaca--U-----------------------------------------------------------------------------------------------------------------------------------------------------------------------------------------------------------------------------------------------GA-AUA-CA--UA----GUG-UA-C----C-G--A-GG-C-GAACCG-GGA-G-AACUGAAACAUCU-AA-GUA-CCCCGAG-GAAAAGA-AA-UC-A-A--CC------GA-GAUUCC-CU-CAG-UAGC-GGCG-AGCGA-ACG-GGGA-UUA-GCCCU---------------------------------------------------------------------------------------------------------------------------------------------------ua-----------------------------------------------------------------------------------------------------------------------------------------------agcauc-uug-gaaguu--ag-ug-gaac-g-guc-c-u-ggaa-a-g-gccg-GCGAUAC-AGGG-UGAUAGCCCCGU-A-CAC-gaa-aacaac-cu-ugaugu-----------ga--aa-uc-------------------------------------------------------------------------------GAGUA-GGG-C-GGGA--CAC-GUG-ACAUCCU-GU-C-U-GAAUAU--GGG-GGGACCAU--CC-UCC-AAGG-CUAA----AUA-CUCC-UGACUGACC-GAUAGUG-AACC-AGUA-CCGUGA-GG-GA-AAGGCGAAAA-GAACCCC-UGUGA-GGGGA--GUGAAA-UAGAACCUGAAA-CCGU--GUACGUACAA-G-C-AGUG-GGA-GC-CC----------------------------------------------------------------------------------------------------------------------------------------------------------------------------------------------------------------------------------------------------------------------------------------------------------------------------------------------------------------------------------------------------------------------------------------------------------------------------------------------------------------------------------------------------------------------uucg--------------------------------------------------GG--G-UGAC-UGCGUACCU-U-UUG-UAUAAUGGGUCAGCGACUU-AC-A-UUU-UGU-AGC----GAGGUUAA-CC--------GUAUA---GG-GG-AGCCGUA--GGGAAA-CCGAG-UCU-UAA---CUGGGCGU----------------------------------------------------------------------------------------------------------------------------------------------------------------------------------------------------------------------------------------------------------------------------------------------------------------------------------------------------cuaG-UUGCAAG-GUGUA-GACCCG-AAAC-C-GG-GUGA-UCUAGCCAUGG-GCAGGUUGAA-GGU-UGAGUA-ACAU-CAACU-GGA-GGACCGAACC-CAC-UA-AC--GUUG-CAAAGUUA-GGGG-AUGAC-CUGUGGCUG-G-GGGU--GAAAGGCC-AAUCAAAC-UCGG-AG-AUAGC-UGGUUCU-CCCCG--AAAG-CUAU-UUAG-GUAGCGC-CUCGGA-CGa------A-UA-C--UA-CU-GGGGGUAG-AGC-ACU-GU-UUGGA-C-UA---GG-GGGUC--AUCCCGACUUACCAA-CUCCAU-GCAAACUCCGAA-UA-CCA-G-U-A--AGUAA----U-AUC-C-GGGAGACACAC--GGCGGGUGCUAACGUCCGU--CGUG-AAGA-GGG-AAACAA-CCCAGACCGCCGGCUAAG-GU-CCCA-AAGUU-CUGG-U-UAA-GUG--------GGAAACGAUGUG-GGA-AGGCUCA--GACA-G-CUAGG-AUG-UUGGCUUAGAAGCAGCCAU--CAUUUAAAGAAAGC-GUAA-UA--------G-CUCAC-UAGU-------CGA------G-U-CGG-CC--UG-CGCGG--AAGAU-GUAA-C-GGGG--CU--CAAACC-AGG-C--ACC-GAA-G-CCGC-GGau--uu-gcac---------uua--------------------------------------------------------------------------------------------------------------------------------------------------------------------------------------------------------------------------------------------------------------------------------------------------------------------------------------------------------------------------------------------------------------------------------------------------------------------gug-c-aa--gu-GG-UAGG--GGA-G-----CGUU-CU-G-UAA-------------------------------------------------------------------------------------------------------------------------G-U-CUG-C-GAA-GG-UG-U-A-UC--GAGA----G-GU--A-UG-CUGGAG-AU-AU-CA-GAA-GUGC-GAA-UGC-UGA--CGUA-AGUA--ACG--AUAA-A-GGG-GGUGA-AAA-GCCUC-CU---CGCC-GGA-AGA-C-CA-----------------------------------------------------AGG-GUU-CCU-G-UC-CAACG-UUA-AU-C--GG--GGCAGGGU--GAGU-CGAC-C-CCUAACGUGAG--GC-C-----GAAA---G-G-C-GU-AAUCG--AUGG-GAAG-CAG-G--UU-AAUAUUC-CUGCAC-ga-c--uu-gua-auu-----------------------------------------------------------------------------------------------------------------------------gcgau------g-ggg--gga-cggag--aaggcua--ggug-g---g-cc-ag-g-----cg--a--cgg-u-ug----u-----------------------------------------------------------------------------------------------------------c--c-uggu--gaaa-----------------gugc-g--uaggu--------------------------------------------gguguu-ucua-gg-ca-aa---u--cc--g--gaggcgcaa----------------------------------------------------------------------------------------------------------------------------------------------cacu--ga--gacacg-a-ga-c-gaa---------------------------------------------------cac-ac---uac--g-----guggu------------------------------------g-aag----ccauu--gaugcc--cug--c-uu-cc-aggaaa-agccuc--uaagcuuca-----------------------------------------------------------------------------------------------------------------ga-u-uac-aa---gu----cAU-CGUA-CCCCAAACCGACACAGGUGG-UCGGGU-A-GAGAA-UACCAA-GGCGCUUGAG-AGAA-CUCGGGUG---------------AAGGAA-CUAGG-CA----------AAAUAGA-ACC-GUAAC--UUCG-GG-AG-AAGGUUC-G-CUCUUga--ugg-u-g--------aa-gucc---cuugc---ggau-g---------gagcug-u-cGGGAG-UCGC-AGUGA-CCAGAUG-GC-UGGGACU-GUUUAUCAAAAACACAGCAC-UCUGCAAACACGAA-A------GUG-GA-C-GUAU-AGGGUGUGA-CACCUGCCCGGU-GCCG-GAAGG-UUAAUUGAUGG-GGUUA-GC-------G-CAA----------------GCGA-AGCUCUU-AUCGAAG-CCCCGGU-AAC-GGC-GGCC-GUAACUAUAACGGU-CCUAAGGUAGCG-AAAUU-CCUU-GUC-GGGUAAGUUCCGACCUGCACGAA-UGGU-GUAACCA-UGGCCAU-GCUG-UCU-CCAC-CCGAGACUCAGUGAA-AUC-GAAUU-CG-CCGUG--AA-GAU-G-CGGUGUACCCGCGGC-UAGACGGAAAGACCCCGUGAACCUU-UACUACAGCUUGGCACUGAACAUUG-AACCUACAU-GUGUAGGAUAGGUGG-GAGGCUUU-GAA-G------GCG-UGACGCCAGUUGCGCU-GGAGCCGUC-C-UUGAAAUACCACCCU----UG-UAUGUUU-GAUG-UUCUAA-CGC-AG-G----GCCC--UGAAUCGGGCUC-GCG-GACAGUGCCUGGUGGG-UAGU-UUGAC-U-GGGGCGGUCUCC-U-CCCAA-AGAGUA-ACGGAGGAGCACGAAG-GUUGGCUAAUCCUGGUCGGACAUCAGGA-GGU---UAGUGCAAUGGCAUAA-GC-CAGCUUAACUGCUAGACGGACAGGUCGAGCAGGUACGAAAGU-AGG-UCAUAGUGAUC-CGGUGGUU-CU-G-AAUGGAAGGGCCAUCGCUCAAC-GGAUAAAAGGUA-CUC-CGGG-G-AU-AACAG-GCUGA--UACCGCCCAAG-A-G-UUC-AUA-UCGACGGCG-GU-GU-UUGGCACCU-CGAUGUCGGCUCAUCACAUCCUGGGGCUGAAGU---C-GGUC-CC-AAGGGU-AU-GGCU-GUU-CGC--CAUUUA-AAGUGGU-AC-G-CGA-GCUGGGUUCA-GAACGU-CGUGA-GACAGUU-CGG-U-CCCU-AU-CUGCCGUGGG-CG-UUGGAUGAUU-GA-A-GGGAGU-UGC--------------UCCUAGUACGAGA-GGACC-GGAGUGAA-CGAACCU--CUGGUGU--UCGGGUUGUCAC-GC-CA-GUGGCA-C-UGC-CCGGUA-GCU-AAGU-U-CGGAAUCGAUAACCGCUGAAAGCAUCUAAGC-GUGAA----------------------------------------------------------------------------------------------------------------------------------------------------------------------------------------------------------------------------------------------------------------------------------------------------------------------------------------------------------------------------------------------------------------------------------------------
>Accession:AF508059::SeqID:7121::TaxID:2
------------------------------------------------------------------------------------------------------------------------------------------------------------------------------------guuguauGGUU-AAGU-G-AC----UAA-GCG-UACA-UG-GUG-GAUG--CCU-UG-GC-AG-UCAG-A-GGC-GAUGAAG-GA--C-GU-ACUAA--CC-U-GC-G-AUAA-GCU-G-UGAG--AAGUC-G-GU-AAGA----GAC-GC-UAUUACUCACAG-AUU-UC-CGAAUGGGGAAA-CCC--A-CU-uagc-------------------------------------------------------------------------------------------------------------------------------------------------------------------------------------------------------------------------------------------auaa-----------gc---UAGguaucguugca----U-----------------------------------------------------------------------------------------------------------------------------------------------------------------------------------------------------------------------------------------------GA-AUA-CA--UA----GUG-CA-A----C-G--A-GG-C-GAACCG-GGA-G-AACUGAAACAUCU-AA-GUA-CCCCGAG-GAAAAGA-AA-UC-A-A--CC------GA-GAUUCC-CU-CAG-UAGC-GGCG-AGCGA-ACG-GGGA-UUA-GCCCU---------------------------------------------------------------------------------------------------------------------------------------------------uaaguu-----------------------------------------------------------------------------------------------------------------------------------------------uc-uug-gaaguu--ag-ug-gaau-g-guc-c-u-ggaa-a-g-gcca-GCGAUAC-AGGG-UGAUAGCCCCGU-A-CAC-gaa-aacgac-cu-uga-------------------------------------------------agugaaauc--------------------------------------------GAGUA-GGG-C-GGGA--CAC-GUG-ACAUCCU-GU-C-U-GAAUAU--GGG-GGGACCAU--CC-UCC-AAGG-CUAA----AUA-CUCC-UGACUGACC-GAUAGUG-AACC-AGUA-CCGUGA-GG-GA-AAGGCGAAAA-GAACCCC-UGUGA-GGGGA--GUGAAA-UAGAACCUGAAA-CCGU--GUACGUACAA-G-C-AGUG-GGA-GC-CC----------------------------------------------------------------------------------------------------------------------------------------------------------------------------------------------------------------------------------------------------------------------------------------------------------------------------------------------------------------------------------------------------------------------------------------------------------------------------------------------------------------------------------------------------------------------uucg--------------------------------------------------GG--G-UGAC-UGCGUACCU-U-UUG-UAUAAUGGGUCAGCGACUU-AC-A-UUU-UGU-AGC----GAGGUUAA-CC--------GUAUA---GG-GG-AGCCGUA--GGGAAA-CCGAG-UCU-UAA---CUGGGCGU----------------------------------------------------------------------------------------------------------------------------------------------------------------------------------------------------------------------------------------------------------------------------------------------------------------------------------------------------cuaG-UUGCAAG-GUGUA-GACCCG-AAAC-C-GG-GUGA-UCUAGCCAUGG-GCAGGUUGAA-GGU-UGAGUA-ACAU-CAACU-GGA-GGACCGAACC-CAC-UA-AC--GUUG-CAAAGUUA-GGGG-AUGAC-CUGUGGCUG-G-GGGU--GAAAGGCC-AAUCAAAC-UCGG-AG-AUAGC-UGGUUCU-CCCCG--AAAG-CUAU-UUAG-GUAGCGC-CUCGGA-CGa------A-UA-C--UA-CU-GGGGGUAG-AGC-ACU-GU-UUGGA-C-UA---GG-GGGUC--AUCCCGACUUACCAA-CUCCAU-GCAAACUCCGAA-UA-CCA-G-U-A--AGUAA----U-AUC-C-GGGAGACACAC--GGCGGGUGCUAACGUCCGU--CGUG-AAGA-GGG-AAACAA-CCCAGACCGCCGGCUAAG-GU-CCCA-AAGUU-CUGG-U-UAA-GUG--------GGAAACGAUGUG-GGA-AGGCUCA--GACA-G-CUAGG-AUG-UUGGCUUAGAAGCAGCCAU--CAUUUAAAGAAAGC-GUAA-UA--------G-CUCAC-UAGU-------CGA------G-U-CGG-CC--UG-CGCGG--AAGAU-GUAA-C-GGGG--CU--CAAACC-AGG-C--ACC-GAA-G-CCGC-GGau--uc-acac---------uaa--------------------------------------------------------------------------------------------------------------------------------------------------------------------------------------------------------------------------------------------------------------------------------------------------------------------------------------------------------------------------------------------------------------------------------------------------------------------gug-u-ga--gu-GG-UAGG--GGA-G-----CGUU-CU-G-UAA-------------------------------------------------------------------------------------------------------------------------G-U-CUG-C-GAA-GG-UG-U-A-UC--GAGA----G-GU--A-UG-CUGGAG-AU-AU-CA-GAA-GUGC-GAA-UGC-UGA--CGUA-AGUA--ACG--AUAA-A-GGG-GGUGA-AAA-GCCUC-CU---CGCC-GGA-AGA-C-CA-----------------------------------------------------AGG-GUU-CCU-G-UC-CAACG-UUA-AU-C--GG--GGCAGGGU--GAGU-CGAC-C-CCUAAGGUGAG--GC-C-----GAAA---G-G-C-GU-AAUCG--AUGG-GAAG-CAG-G--UU-AAUAUUC-CUGCAC-ga-c--uu-gua-auu-----------------------------------------------------------------------------------------------------------------------------gcgau------g-ggg--gga-cggag--aaggcua--ggug-g---g-cc-ag-g-----cg--a--cgg-u-ug----u-----------------------------------------------------------------------------------------------------------c--c-uggu--gaaa-----------------gugc-g--uaggu--------------------------------------------gguguu-ucua-gg-ca-aa---u--cc--g--gagacacaa----------------------------------------------------------------------------------------------------------------------------------------------cacu--ga--gacacg-a-ga-c-gaa---------------------------------------------------cgc-ac---uac--g-----gugcg------------------------------------g-aag----ccauu--gaugcc--cug--c-uu-cc-aggaaa-agccuc--uaagcuuca-----------------------------------------------------------------------------------------------------------------ga-u-uac-aa---gu----cAU-CGUA-CCCCAAACCGACACAGGUGG-UCGGGU-A-GAGAA-UACCAA-GGCGCUUGAG-AGAA-CUCGGGUG---------------AAGGAA-CUAGG-CA----------AAAUAGA-ACC-GUAAC--UUCG-GG-AG-AAGGUUC-G-CUCUUga--cag-u-g--------aa-gucc---cuugc---ggau-g---------gagcag-u-uGGGAG-UCGC-AGUGA-CCAGAUG-GC-UGGGACU-GUUUAUCAAAAACACAGCAC-UCUGCAAACACGAA-A------GUG-GA-C-GUAU-AGGGUGUGA-CACCUGCCCGGU-GCCG-GAAGG-UUAAUUGAUGG-GGUUA-GC-------G-CAA----------------GCGA-AGCUCUU-AUCGAAG-CCCCGGU-AAC-GGC-GGCC-GUAACUAUAACGGU-CCUAAGGUAGCG-AAAUU-CCUU-GUC-GGGUAAGUUCCGACCUGCACGAA-UGGU-GUAACCA-UGGCCAU-GCUG-UCU-CCAC-CCGAGACUCAGUGAA-AUC-GAAUU-CG-CCGUG--AA-GAU-G-CGGUGUACCCGCGGC-UAGACGGAAAGACCCCGUGAACCUU-UACUACAGCUUGGCACUGAACAUUG-AACCUACAU-GUGUAGGAUAGGUGG-GAGGCUUU-GAA-G------GCG-UGACGCCAGUUGCGCU-GGAGCCGUC-C-UUGAAAUACCACCCU----UG-UAUGUUU-GAUG-UUCUAA-CGC-AG-G----GCCC--UGAAUCGGGCUC-GCG-GACAGUGCCUGGUGGG-UAGU-UUGAC-U-GGGGCGGUCUCC-U-CCCAA-AGAGUA-ACGGAGGAGCACGAAG-GUUGGCUAAUCCUGGUCGGACAUCAGGA-GGU---UAGUGCAAUGGCAUAA-GC-CAGCUUAACUGCGAGACGGACAGGUCGAGCAGGUACGAAAGU-AGG-UCAUAGUGAUC-CGGUGGUU-CU-G-AAUGGAAGGGCCAUCGCUCAAC-GGAUAAAAGGUA-CUC-CGGG-G-AU-AACAG-GCUGA--UACCGCCCAAG-A-G-UUC-AUA-UCGACGGCG-GU-GU-UUGGCACCU-CGAUGUCGGCUCAUCACAUCCUGGGGCUGAAGU---C-GGUC-CC-AAGGGU-AU-GGCU-GUU-CGC--CAUUUA-AAGUGGU-AC-G-CGA-GCUGGGUUCA-GAACGU-CGUGA-GACAGUU-CGG-U-CCCU-AU-CUGCCGUGGG-CG-UUGGAUGAUU-GA-A-GGGAGU-UGC--------------UCCUAGUACGAGA-GGACC-GGAGUGAA-CGAACCU--CUGGUGU--UCGGGUUGUCAC-GC-CA-GUGGCA-C-UGC-CCGGUA-GCU-AAGU-U-CGGAAUCGAUAACCGCUGAA---------------------------------------------------------------------------------------------------------------------------------------------------------------------------------------------------------------------------------------------------------------------------------------------------------------------------------------------------------------------------------------------------------------------------------------------------------------
>Accession:AY127578::SeqID:7132::TaxID:2
------------------------------------------------------------------------------------------------------------------------------------------------------------------------------------guuguauGGUU-AAGU-G-AC----UAA-GCG-UACA-UG-GUG-GAUG--CCU-UG-GC-AG-UCAG-A-GGC-GAUGAAG-GA--C-GU-ACUAA--CC-U-GC-G-AUAA-GCU-G-UGAG--AAGUC-G-GU-AAGA----GAC-GC-UAUUACUCACAG-AUU-UC-CGAAUGGGGAAA-CCC--A-CC-cagc-------------------------------------------------------------------------------------------------------------------------------------------------------------------------------------------------------------------------------------------acaa-----------gc--uGGG--ua-ucuauuac--U-----------------------------------------------------------------------------------------------------------------------------------------------------------------------------------------------------------------------------------------------GA-AUA-CA--UA----GGU-AA-U----A-G--A-GG-C-GAACCG-GGA-G-AACUGAAACAUCU-AA-GUA-CCCCGAG-GAAAAGA-AA-UC-A-A--CC------GA-GAUUCC-CU-CAG-UAGC-GGCG-AGCGA-ACG-GGGA-UUA-GCCCU---------------------------------------------------------------------------------------------------------------------------------------------------uaaguu-----------------------------------------------------------------------------------------------------------------------------------------------uc-uug-gaaguu--ag-ug-gaau-g-guc-c-u-ggaa-a-g-gcca-GCGAUAC-AGGG-UGAUAGCCCCGU-A-CAU-gaa-aacgac-cu-uga-------------------------------------------------agugaaauc--------------------------------------------GAGUA-GGG-C-GGGA--CAC-GUG-ACAUCCU-GU-C-U-GAAUAU--GGG-GGGACCAU--CC-UCC-AAGG-CUAA----AUA-CUCC-UGACUGACC-GAUAGUG-AACC-AGUA-CCGUGA-GG-GA-AAGGCGAAAA-GAACCCC-UGUGA-GGGGA--GUGAAA-UAGAACCUGAAA-CCGU--GUACGUACAA-G-C-AGUG-GGA-GC-CC----------------------------------------------------------------------------------------------------------------------------------------------------------------------------------------------------------------------------------------------------------------------------------------------------------------------------------------------------------------------------------------------------------------------------------------------------------------------------------------------------------------------------------------------------------------------uucg--------------------------------------------------GG--G-UGAC-UGCGUACCU-U-UUG-UAUAAUGGGUCAGCGACUU-AC-A-UUU-UGU-AGC----GAGGUUAA-CC--------GUAUA---GG-GG-AGCCGUA--GGGAAA-CCGAG-UCU-UAA---CUGGGCGU----------------------------------------------------------------------------------------------------------------------------------------------------------------------------------------------------------------------------------------------------------------------------------------------------------------------------------------------------cuaG-UUGCAAG-GUGUA-GACCCG-AAAC-C-GG-GUGA-UCUAGCCAUGG-GCAGGUUGAA-GGU-UGAGUA-ACAU-CAACU-GGA-GGACCGAACC-CAC-UA-AC--GUUG-CAAAGUUA-GGGG-AUGAC-CUGUGGCUG-G-GGGU--GAAAGGCC-AAUCAAAC-UCGG-AG-AUAGC-UGGUUCU-CCCCG--AAAG-CUAU-UUAG-GUAGCGC-CUCGGA-CGa------A-UA-C--UA-CU-GGGGGUAG-AGC-ACU-GU-UUGGA-C-UA---GG-GGGUC--AUCCCGACUUACCAA-CUCCAU-GCAAACUCCGAA-UA-CCA-G-U-A--AGUAA----U-AUC-C-GGGAGACACAC--GGCGGGUGCUAACGUCCGU--CGUG-AAGA-GGG-AAACAA-CCCAGACCGCCGGCUAAG-GU-CCCA-AAGUU-CUGG-U-UAA-GUG--------GGAAACGAUGUG-GGA-AGGCUCA--GACA-G-CUAGG-AUG-UUGGCUUAGAAGCAGCCAU--CAUUUAAAGAAAGC-GUAA-UA--------G-CUCAC-UAGU-------CGA------G-U-CGG-CC--UG-CGCGG--AAGAU-GUAA-C-GGGG--CU--CAAACC-AGG-C--ACC-GAA-G-CCGC-GGau--uc-ac------------------------------------------------------------------------------------------------------------------------------------------------------------------------------------------------------------------------------------------------------acuuaugu----------------------------------------------------------------------------------------------------------------------------------------------------------------------------------------------------------------------g-u-ga--gu-GG-UAGG--GGA-G-----CGUU-CU-G-UAA-------------------------------------------------------------------------------------------------------------------------G-U-CUG-C-GAA-GG-UG-U-A-UC--GAGA----G-GU--A-UG-CUGGAG-AU-AU-CA-GAA-GUGC-GAA-UGC-UGA--CGUA-AGUA--ACG--AUAA-A-GGG-GGUGA-AAA-GCCUC-CU---CGCC-GGA-AGA-C-CA-----------------------------------------------------AGG-GUU-CCU-G-UC-CAACG-UUA-AU-C--GG--GGCAGGGU--GAGU-CGAC-C-CCUAAGGUGAG--GC-C-----GAAA---G-G-C-GU-AAUCG--AUGG-GAAG-CAG-G--UU-AAUAUUC-CUGCAC-ga-c--uu-gua-auu-----------------------------------------------------------------------------------------------------------------------------gcgau------g-ggg--gga-cggag--aaggcua--ggug-g---g-cc-ag-g-----cg--a--cgg-u-ug----u-----------------------------------------------------------------------------------------------------------c--c-uggu--gaaa-----------------gugc-g--uaggu--------------------------------------------gguguu-ucua-gg-ca-aa---u--cc--g--gagacacaa----------------------------------------------------------------------------------------------------------------------------------------------cacu--ga--gacacg-a-ga-c-gaa---------------------------------------------------gcc-ac---uac--g-----guggu------------------------------------g-aag----ccauu--gaugcc--cug--c-uu-cc-aggaaa-agccuc--uaagcuuca-----------------------------------------------------------------------------------------------------------------ga-u-uac-aa---gu----cAU-CGUA-CCCCAAACCGACACAGGUGG-UCGGGU-A-GAGAA-UACCAA-GGCGCUUGAG-AGAA-CUCGGGUG---------------AAGGAA-CUAGG-CA----------AAAUAGA-ACC-GUAAC--UUCG-GG-AG-AAGGUUC-G-CUCUUga--cag-u-g--------aa-gucc---cuugc---ggau-g---------gagcag-u-uGGGAG-UCGC-AGUGA-CCAGAUG-GC-UGGGACU-GUUUAUCAAAAACACAGCAC-UCUGCAAACACGAA-A------GUG-GA-C-GUAU-AGGGUGUGA-CACCUGCCCGGU-GCCG-GAAGG-UUAAUUGAUGG-GGUUA-GC-------G-CAA----------------GCGA-AGCUCUUGAUCGAAG-CCCCGGUAAAC-GGC-GGCC-GUAACUAUAACGGU-CCUAAGGUAGCG-AAAUU-CCUU-GUC-GGGUAAGUUCCGACCUGCACGAA-UGGU-GUAACCA-UGGCCAU-GCUG-UCU-CCAC-CCGAGACUCAGUGAA-AUC-GAAUU-CG-CCGUG--AA-GAU-G-CGGUGUACCCGCGGC-UAGACGGAAAGACCCCGUGAACCUU-UACUACAGCUUGGCACUGAACAUUG-AACCUACAU-GUGUAGGAUAGGUGG-GAGGCUUU-GAA-G------GCG-UGACGCCAGUUGCGCU-GGAGCCGUC-C-UUGAAAUACCACCCU----UG-UAUGUUU-GAUG-UUCUAA-CGC-AG-G----GCCC--UGAAUCGGGCUC-GCG-GACAGUGCCUGGUGGG-UAGU-UUGAC-U-GGGGCGGUCUCC-U-CCCAA-AGAGUA-ACGGAGGAGCACGAAG-GUUGGCUAAUCCUGGUCGGACAUCAGGA-GGU---UAGUGCAAUGGCAUAA-GC-CAGCUUAACUGCGAGACGGACAGGUCGAGCAGGUACGAAAGU-AGG-UCAUAGUGAUC-CGGUGGUU-CU-G-AAUGGAAGGGCCAUCGCUCAAC-GGAUAAAAGGUA-CUC-CGGG-G-AU-AACAG-GCUGA--UACCGCCCAAG-A-G-UUC-AUA-UCGACGGCG-GU-GU-UUGGCACCU-CGAUGUCGGCUCAUCACAUCCUGGGGCUGAAGU---C-GGUC-CC-AAGGGU-AU-GGCU-GUU-CGC--CAUUUA-AAGUGGU-AC-G-CGA-GCUGGGUUCA-GAACGU-CGUGA-GACAGUU-CGG-U-CCCU-AU-CUGCCGUGGG-CG-UUGGAUGAUU-GA-A-GGGAGU-UGC--------------UCCUAGUACGAGA-GGACC-GGAGUGAA-CGAACCU--CUGGUGU--UCGGGUUGUCAC-GC-CA-GUGGCA-C-UGC-CCGGUA-GCU-AAGU-U-CGGAAUCGAUAACCGCUGAAAGCAUCUAAGC-GUGAA----------------------------------------------------------------------------------------------------------------------------------------------------------------------------------------------------------------------------------------------------------------------------------------------------------------------------------------------------------------------------------------------------------------------------------------------
>Accession:AF508058::SeqID:7143::TaxID:2
------------------------------------------------------------------------------------------------------------------------------------------------------------------------------------guuguauGGUU-AAGU-G-AC----UAA-GCG-UACA-UG-GUG-GAUG--CCU-UG-GC-AG-UCAG-A-GGC-GAUGAAG-GA--C-GU-ACUAA--CC-U-GC-G-AUAA-GCC-G-UGAG--CAGUC-G-GU-AAGA----GAC-AU-UACGACUCACGG-AUU-UC-CGAAUGGGGAAA-CCC--A-CU-uagc-------------------------------------------------------------------------------------------------------------------------------------------------------------------------------------------------------------------------------------------auaa-----------gc--uAGGuau-cg-c-uaCG--U-----------------------------------------------------------------------------------------------------------------------------------------------------------------------------------------------------------------------------------------------GA-AUA-CA--UA----GCG-UA-G----C-G--A-GG-C-GAACCG-GGA-G-AACUGAAACAUCU-AA-GUA-CCCCGAG-GAAAAGA-AA-UC-A-A--CC------GA-GAUUCC-CU-CAG-UAGC-GGCG-AGCGA-ACG-GGGA-UUA-GCCCU---------------------------------------------------------------------------------------------------------------------------------------------------ua-----------------------------------------------------------------------------------------------------------------------------------------------agcauc-uug-gaaguu--ag-ug-gaac-g-guc-c-u-ggaa-a-g-gccg-GCGAUAC-AGGG-UGAUAGCCCCGU-A-CAC-gaa-aacaac-cu-ugaugu-----------ga--aa-uc-------------------------------------------------------------------------------GAGUA-GGG-C-GGGA--CAC-GUG-ACAUCCU-GU-C-U-GAAUAU--GGG-GGGACCAU--CC-UCC-AAGG-CUAA----AUA-CUCC-UGACUGACC-GAUAGUG-AACC-AGUA-CCGUGA-GG-GA-AAGGCGAAAA-GAACCCC-UGUGA-GGGGA--GUGAAA-UAGAACCUGAAA-CCGU--GUACGUACAA-G-C-AGUG-GGA-GC-CC----------------------------------------------------------------------------------------------------------------------------------------------------------------------------------------------------------------------------------------------------------------------------------------------------------------------------------------------------------------------------------------------------------------------------------------------------------------------------------------------------------------------------------------------------------------------uucg--------------------------------------------------GG--G-UGAC-UGCGUACCU-U-UUG-UAUAAUGGGUCAGCGACUU-AC-A-UUU-UGU-AGC----GAGGUUAA-CC--------GUAUA---GG-GG-AGCCGUA--GGGAAA-CCGAG-UCU-UAA---CUGGGCGU----------------------------------------------------------------------------------------------------------------------------------------------------------------------------------------------------------------------------------------------------------------------------------------------------------------------------------------------------cuaG-UUGCAAG-GUGUA-GACCCG-AAAC-C-GG-GUGA-UCUAGCCAUGG-GCAGGUUGAA-GGU-UGAGUA-ACAU-CAACU-GGA-GGACCGAACC-CAC-UA-AC--GUUG-CAAAGUUA-GGGG-AUGAC-CUGUGGCUG-G-GGGU--GAAAGGCC-AAUCAAAC-UCGG-AG-AUAGC-UGGUUCU-CCCCG--AAAG-CUAU-UUAG-GUAGCGC-CUCGGA-CGa------A-UA-C--UA-CU-GGGGGUAG-AGC-ACU-GU-UUGGG-C-UA---GG-GGGUC--AUCCCGACUUACCAA-CCCCAU-GCAAACUCCGAA-UA-CCA-G-U-A--AGUAC----U-AUC-C-GGGAGACACAC--GGCGGGUGCUAACGUCCGU--CGUG-AAGA-GGG-AAACAA-CCCAGACCGCCGGCUAAG-GU-CCCA-AAGUU-CUGG-U-UAA-GUG--------GGAAACGAUGUG-GGA-AGGCUCA--GACA-G-CUAGG-AUG-UUGGCUUAGAAGCAGCCAU--CAUUUAAAGAAAGC-GUAA-UA--------G-CUCAC-UAGU-------CGA------G-U-CGG-CC--UG-CGCGG--AAGAU-GUAA-C-GGGG--CU--CAAACC-AGG-C--ACC-GAA-G-CCGC-GGau--uc-ac------------------------------------------------------------------------------------------------------------------------------------------------------------------------------------------------------------------------------------------------------acuuaugu----------------------------------------------------------------------------------------------------------------------------------------------------------------------------------------------------------------------g-u-ga--gu-GG-UAGG--GGA-G-----CGUU-CU-G-UAA-------------------------------------------------------------------------------------------------------------------------G-U-CUG-C-GAA-GG-UG-U-A-UC--GAGA----G-GU--A-UG-CUGGAG-AU-AU-CA-GAA-GUGC-GAA-UGC-UGA--CGUA-AGUA--ACG--AUAA-A-GGG-GGUGA-AAA-GCCUC-CU---CGCC-GGA-AGA-C-CA-----------------------------------------------------AGG-GUU-CCU-G-UC-CAACG-UUA-AU-C--GG--GGCAGGGU--GAGU-CGAC-C-CCUAAGGUGAG--GC-C-----GAAA---G-G-C-GU-AAUCG--AUGG-GAAG-CAG-G--UU-AAUAUUC-CUGCAC-ga-c--uu-gua-auu-----------------------------------------------------------------------------------------------------------------------------gcgau------g-ggg--gga-cggag--aaggcua--ggug-g---g-cc-ag-g-----cg--a--cgg-u-ug----u-----------------------------------------------------------------------------------------------------------c--c-uggu--gaaa-----------------gugc-g--uaagu--------------------------------------------gguguu-ucua-gg-ca-aa---u--cc--g--gagacacaa----------------------------------------------------------------------------------------------------------------------------------------------cacu--ga--gacacg-a-ga-c-gaa---------------------------------------------------cgc-ac---uac--g-----gugcg------------------------------------g-aag----ccauu--gaugcc--cug--c-uu-cc-aggaaa-agccuc--uaagcuuca-----------------------------------------------------------------------------------------------------------------ga-u-uac-aa---gu----cAU-CGUA-CCCCAAACCGACACAGGUGG-UCGGGU-A-GAGAA-UACCAA-GGCGCUUGAG-AGAA-CUCGGGUG---------------AAGGAA-CUAGG-CA----------AAAUAGA-ACC-GUAAC--UUCG-GG-AG-AAGGUUC-G-CUCUUga--ugg-u-g--------aa-gucc---cuugc---ggau-g---------gagcug-u-cGGGAG-UCGC-AGUGA-CCAGAUG-GC-UGGGACU-GUUUAUCAAAAACACAGCAC-UCUGCAAACACGAA-A------GUG-GA-C-GUAU-AGGGUGUGA-CACCUGCCCGGU-GCCG-GAAGG-UUAAUUGAUGG-GGUUA-GC-------G-CAA----------------GCGA-AGCUCUU-AUCGAAG-CCCCGGUAAAC-GGC-GGCC-GUAACUAUAACGGU-CCUAAGGUAGCG-AAAUU-CCUU-GUC-GGGUAAGUUCCGACCUGCACGAA-UGGU-GUAACCA-UGGCCAU-GCUG-UCU-CCAC-CCGAGACUCAGUGAA-AUC-GAAUU-CG-CCGUG--AA-GAU-G-CGGUGUACCCGCGGC-UAGACGGAAAGACCCCGUGAACCUU-UACUACAGCUUGGCACUGAACAUUG-AACCUACAU-GUGUAGGAUAGGUGG-GAGGCUUU-GAA-G------GCG-UGACGCCAGUUGCGCU-GGAGCCGUC-C-UUGAAAUACCACCCU----UG-UAUGUUU-GAUG-UUCUAA-CGC-AG-G----GCCC--UGAAUCGGGCUC-GCG-GACAGUGCCUGGUGGG-UAGU-UUGAC-U-GGGGCGGUCUCC-U-CCCAA-AGAGUA-ACGGAGGAGCACGAAG-GUUGGCUAAUCCUGGUCGGACAUCAGGA-GGU---UAGUGCAAUGGCAUAA-GC-CAGCUUAACUGCGAGACGGACAGGUCGAGCAGGUACGAAAGU-AGG-UCAUAGUGAUC-CGGUGGUU-CU-G-AAUGGAAGGGCCAUCGCUCAAC-GGAUAAAAGGUA-CUC-CGGG-G-AU-AACAG-GCUGA--UACCGCCCAAG-A-G-UUC-AUA-UCGACGGCG-GU-GU-UUGGCACCU-CGAUGUCGGCUCAUCACAUCCUGGGGCUGAAGU---C-GGUC-CC-AAGGGU-AU-GGCU-GUU-CGC--CAUUUA-AAGUGGU-AC-G-CGA-GCUGGGUUCA-GAACGU-CGUGA-GACAGUU-CGG-U-CCCU-AU-CUGCCGUGGG-CG-UUGGAUGAUU-GA-A-GGGAGU-UGC--------------UCCUAGUACGAGA-GGACC-GGAGUGAA-CGAACCU--CUGGUGU--UCGGGUUGUCAC-GC-CA-GUGGCA-C-UGC-CCGGUA-GCU-AAGU-U-CGGAAUCGAUAACCGCUGAA---------------------------------------------------------------------------------------------------------------------------------------------------------------------------------------------------------------------------------------------------------------------------------------------------------------------------------------------------------------------------------------------------------------------------------------------------------------
>Accession:AY127577::SeqID:7165::TaxID:2
------------------------------------------------------------------------------------------------------------------------------------------------------------------------------------guuguauGGUU-AAGU-G-AC----UAA-GCG-UACA-CG-GUG-GAUG--CCU-UG-GC-AG-UCAG-A-GGC-GAUGAAG-GA--C-GU-ACUAA--CC-U-GC-G-AUAA-GCC-G-UGAU--GAGUC-G-GU-AAGA----GAC-GC-UAUCAAUCACGG-AUU-UC-CGAAUGGGGAAA-CCC--A-CC-cgag-------------------------------------------------------------------------------------------------------------------------------------------------------------------------------------------------------------------------------------------auaa-------cucg------GG--ua-ucuguuac--U-----------------------------------------------------------------------------------------------------------------------------------------------------------------------------------------------------------------------------------------------GA-AUA-CA--UA----GGU-AA-C----A-G--A-GG-C-GAACCG-GGA-G-AACUGAAACAUCU-AA-GUA-CCCCGAG-GAAAAGA-AA-UC-A-A--CC------GA-GAUUCC-CU-CAG-UAGC-GGCG-AGCGA-ACG-GGGA-UUA-GCCCU---------------------------------------------------------------------------------------------------------------------------------------------------ua-----------------------------------------------------------------------------------------------------------------------------------------------agcagcgggg-gcgcu---ag-ug-gaau-g-guc-c-u-ggaa-a-g-gccg-GCGAUAC-AGGG-UGAUAGCCCCGU-A-CAC-gaa-agcaaa-cc-cgaagu-----------ga--aa-uc-------------------------------------------------------------------------------GAGUA-GGG-C-GGGA--CAC-GUG-AUAUCCU-GU-C-U-GAACAU--GGG-GGGACCAU--CC-UCC-AAGG-CUAA----AUA-CUCC-UGACUGACC-GAUAGUG-AACC-AGUA-CCGUGA-GG-GA-AAGGCGAAAA-GAACCCC-UGUGA-GGGGA--GUGAAA-UAGAACCUGAAA-CCGU--GUACGUACAA-G-C-AGUG-GGA-GC-CC----------------------------------------------------------------------------------------------------------------------------------------------------------------------------------------------------------------------------------------------------------------------------------------------------------------------------------------------------------------------------------------------------------------------------------------------------------------------------------------------------------------------------------------------------------------------uucg--------------------------------------------------GG--G-UGAC-UGCGUACCU-U-UUG-UAUAAUGGGUCAGCGACUU-AC-A-UUC-UGU-AGC----GAGGUUAA-CC--------GUAUA---GG-GG-AGCCGUA--GGGAAA-CCGAG-UCU-UAA---CUGGGCGA----------------------------------------------------------------------------------------------------------------------------------------------------------------------------------------------------------------------------------------------------------------------------------------------------------------------------------------------------cuaG-UUGCAGG-GUGUA-GACCCG-AAAC-C-GG-GUGA-UCUAGCCAUGG-GCAGGUUGAA-GGU-UGAGUA-ACAU-CAACU-GGA-GGACCGAACC-CAC-UA-AC--GUUG-CAAAGUUA-GGGG-AUGAC-CUGUGGCUG-G-GGGU--GAAAGGCC-AAUCAAAC-UCGG-AG-AUAGC-UGGUUCU-CCCCG--AAAG-CUAU-UUAG-GUAGCGC-CUCGGA-CGa------A-UA-C--UA-CU-GGGGGUAG-AGC-ACU-GU-UAAGG-C-UA---GG-GGGUC--AUCCCGACUUACCAA-CCCUUU-GCAAACUCCGAA-UA-CCA-G-U-A--AGUAC----U-AUC-C-GGGAGACACAC--GGCGGGUGCUAACGUCCGU--CGUG-AAGA-GGG-AAACAA-CCCAGACCGCCGGCUAAG-GU-CCCA-AAGUU-CUGG-U-UAA-GUG--------GGAAACGAUGUG-GGA-AGGCUCA--GACA-G-CUAGG-AUG-UUGGCUUAGAAGCAGCCAU--CAUUUAAAGAAAGC-GUAA-UA--------G-CUCAC-UAGU-------CGA------G-U-CGG-CC--UG-CGCGG--AAGAU-GUAA-C-GGGG--CU--CAAACC-AGG-C--ACC-GAA-G-CCGC-GGau--u-------------------------------------------------------------------------------------------------------------------------------------------------------------------------------------------------------------------------------------------------------ugcacuuaugugca------------------------------------------------------------------------------------------------------------------------------------------------------------------------------------------------------------------------a--gu-GG-UAGG--GGA-G-----CGUU-CU-G-UAA-------------------------------------------------------------------------------------------------------------------------G-U-CUG-C-GAA-GG-UG-U-A-UC--GAGA----G-GU--A-UG-CUGGAG-AU-AU-CA-GAA-GUGC-GAA-UGC-UGA--CGUA-AGUA--ACG--AUAA-A-GGG-GGUGA-AAA-GCCUC-CU---CGCC-GGA-AGA-C-CA-----------------------------------------------------AGG-GUU-CCU-G-UC-CAACG-UUA-AU-C--GG--GGCAGGGU--GAGU-CGAC-C-CCUAAGGCGAG--GC-C-----GAAA---G-G-C-GU-AGUCG--AUGG-GAAG-CAG-G--UU-AAUAUUC-CUGCAC-ga-c--uu-gua-auu-----------------------------------------------------------------------------------------------------------------------------gcgau------g-ggg--gga-cggag--aaggcua--ggug-g---g-cc-ag-g-----cg--a--cgg-u-ug----u-----------------------------------------------------------------------------------------------------------c--c-uggu--gaaa-----------------gggu-g--uaggc--------------------------------------------gguauc-ucua-gg-ca-aa---u--cc--g--gagaugcaa----------------------------------------------------------------------------------------------------------------------------------------------cgcu--ga--gaccug-a-ga-c-gaa---------------------------------------------------gcc-ac---uac--g-----guggu------------------------------------g-aag----ccauu--gaugcc--cug--c-uu-cc-aggaaa-agccuc--uaagcuuca-----------------------------------------------------------------------------------------------------------------ga-u-uac-aa---gu----cAU-CGUA-CCCCAAACCGACACAGGUGG-UCGGGU-A-GAGAA-UACCAA-GGCGCUUGAG-AGAA-CUCGGGUG---------------AAGGAA-CUAGG-CA----------AAAUAGU-ACC-GUAAC--UUCG-GG-AG-AAGGUAC-G-CUCUUga--ugg-u-g--------aa-guga---cuugc---ucac-g---------gagcug-u-cGGGAG-UCGC-AGUGA-CCAGAUG-GC-UGGGACU-GUUUAUCAAAAACACAGCAC-UCUGCAAACACGAA-A------GUG-GA-C-GUAU-AGGGUGUGA-CACCUGCCCGGU-GCCG-GAAGG-UUAAUUGAUGG-GGUUA-GC-------G-CAA----------------GCGA-AGCUCUUGAUCGAAG-CCCCGGUAAAC-GGC-GGCC-GUAACUAUAACGGU-CCUAAGGUAGCG-AAAUU-CCUU-GUC-GGGUAAGUUCCGACCUGCACGAA-UGGU-GUAACCA-UGGCCAU-GCUG-UCU-CCAC-CCGAGACUCAGUGAA-AUC-GAAAU-CG-CCGUG--AA-GAU-G-CGGUGUACCCGCGGC-UAGACGGAAAGACCCCGUGAACCUU-UACUACAGCUUGGCACUGAACAUUG-AACCUACAU-GUGUAGGAUAGGUGG-GAGGCUUU-GAA-G------CGA-UGACGCCAGUUGUCGU-GGAGCCGUC-C-UUGAAAUACCACCCU----UG-UAUGUUU-GAUG-UUCUAA-CGU-AG-G----CCCC--UGAAUCGGGGUU-GCG-GACAGUGCCUGGUGGG-UAGU-UUGAC-U-GGGGCGGUCUCC-U-CCCAA-AGAGUA-ACGGAGGAGCACGAAG-GUUGGCUAAUCCUGGUCGGACAUCAGGA-GGU---UAGUGCAAUGGCAUAA-GC-CAGCUUAACUGCGAGACGGACAGGUCGAGCAGGUGCGAAAGC-AGG-UCAUAGUGAUC-CGGUGGUU-CU-G-UAUGGAAGGGCCAUCGCUCAAC-GGAUAAAAGGUA-CUC-CGGG-G-AU-AACAG-GCUGA--UACCGCCCAAG-A-G-UUC-AUA-UCGACGGCG-GU-GU-UUGGCACCU-CGAUGUCGGCUCAUCACAUCCUGGGGCUGAAGU---U-GGUC-CC-AAGGGU-AU-GGCU-GUU-CGC--CAUUUA-AAGUGGU-AC-G-CGA-GCUGGGUUCA-GAACGU-CGUGA-GACAGUU-CGG-U-CCCU-AU-CUGCCGUGGG-CG-UUGGAUGAUU-GA-A-GGGAGU-UGC--------------UCCUAGUACGAGA-GGACC-GGAGUGAA-CGAACCU--CUGGUGU--UCGGGUUGUCAC-GC-CA-GUGGCA-C-UGC-CCGGUA-GCU-AAGU-U-CGGAAUCGAUAACCGCUGAAAGCAUCUAAGC-GUGAA----------------------------------------------------------------------------------------------------------------------------------------------------------------------------------------------------------------------------------------------------------------------------------------------------------------------------------------------------------------------------------------------------------------------------------------------
>Accession:AF508060::SeqID:7184::TaxID:2
------------------------------------------------------------------------------------------------------------------------------------------------------------------------------------guuguauGGUU-AAGU-G-AC----UAA-GCG-UACA-UG-GUG-GAUG--CCU-UG-GC-AG-UCAC-A-GGC-GAUGAAG-GA--C-GU-ACUAA--CC-U-GC-G-AUAA-GCU-G-UGAG--AAGUC-G-GU-AAGA----GAC-GC-UAUUACUCACAG-AUU-UC-CGAAUGGGGAAA-CCC--A-CC-cagc-------------------------------------------------------------------------------------------------------------------------------------------------------------------------------------------------------------------------------------------auaa-----------g--uuGGG--ua-ucguuaaG--U-----------------------------------------------------------------------------------------------------------------------------------------------------------------------------------------------------------------------------------------------GA-AUA-CA--UA----GCU-UA-A----C-G--A-GG-C-GAACCG-GGA-G-AACUGAAACAUCU-AA-GUA-CCCCGAG-GAAAAGA-AA-UC-A-A--CC------GA-GAUUCC-CU-UAG-UAGC-GGCG-AGCGA-ACG-GGGA-UUA-GCCCU---------------------------------------------------------------------------------------------------------------------------------------------------uaaguu-----------------------------------------------------------------------------------------------------------------------------------------------uc-uug-gaaguu--ag-ug-gaau-g-guc-c-u-ggaa-a-g-gcca-GCGAUAC-AGGG-UGAUAGCCCCGU-A-CAU-gaa-aacgac-cu-uga-------------------------------------------------agugaaauc--------------------------------------------GAGUA-GGG-C-GGGA--CAC-GUG-ACAUCCU-GU-C-U-GAAUAU--GGG-GGGACCAU--CC-UCC-AAGG-CUAA----AUA-CUCC-UGACUGACC-GAUAGUG-AACC-AGUA-CCGUGA-GG-GA-AAGGCGAAAA-GAACCCC-UGUGA-GGGGA--GUGAAA-UAGAACCUGAAA-CCGU--GUACGUACAA-G-C-AGUG-GGA-GC-CC----------------------------------------------------------------------------------------------------------------------------------------------------------------------------------------------------------------------------------------------------------------------------------------------------------------------------------------------------------------------------------------------------------------------------------------------------------------------------------------------------------------------------------------------------------------------uucg--------------------------------------------------GG--G-UGAC-UGCGUACCU-U-UUG-UAUAAUGGGUCAGCGACUU-AC-A-UUU-UGU-AGC----GAGGUUAA-CC--------GUAUA---GG-GG-AGCCGUA--GGGAAA-CCGAG-UCU-UAA---CUGGGCGU----------------------------------------------------------------------------------------------------------------------------------------------------------------------------------------------------------------------------------------------------------------------------------------------------------------------------------------------------cuaG-UUGCAAG-GUGUA-GACCCG-AAAC-C-GG-GUGA-UCUAGCCAUGG-GCAGGUUGAA-GGU-UGAGUA-ACAU-CAACU-GGA-GGACCGAACC-CAC-UA-AC--GUUG-CAAAGUUA-GGGG-AUGAC-CUGUGGCUG-G-GGGU--GAAAGGCC-AAUCAAAC-UCGG-AG-AUAGC-UGGUUCU-CCCCG--AAAG-CUAU-UUAG-GUAGCGC-CUCGGA-CGa------A-UA-C--UA-CU-GGGGGUAG-AGC-ACU-GU-UUGGA-C-UA---GG-GGGUC--AUCCCGACUUACCAA-CUCCAU-GCAAACUCCGAA-UA-CCA-G-U-A--AGUAA----U-AUC-C-GGGAGACACAC--GGCGGGUGCUAACGUCCGU--CGUG-AAGA-GGG-AAACAA-CCCAGACCGCCAGCUAAG-GU-CCCA-AAGUU-CUGG-U-UAA-GUG--------GGAAACGAUGUG-GGA-AGGCUCA--GACA-G-CUAGG-AUG-UUGGCUUAGAAGCAGCCAU--CAUUUAAAGAAAGC-GUAA-UA--------G-CUCAC-UAGU-------CGA------G-U-CGG-CC--UG-CGCGG--AAGAU-GUAA-C-GGGG--CU--CAAACC-AGG-C--ACC-GAA-G-CCGC-GGau--uc-a------------------------------------------------------------------------------------------------------------------------------------------------------------------------------------------------------------------------------------------------------uacuuaugua-----------------------------------------------------------------------------------------------------------------------------------------------------------------------------------------------------------------------u-ga--gu-GG-UAGG--GGA-G-----CGUU-CU-G-UAA-------------------------------------------------------------------------------------------------------------------------G-U-CUG-C-GAA-GG-UG-U-A-UC--GAGA----G-GU--A-UG-CUGGAG-AU-AU-CA-GAA-GUGC-GAA-UGC-UGA--CGUA-AGUA--ACG--AUAA-A-GGG-GGUGA-AAA-GCCUC-CU---CGCC-GGA-AGA-C-CA-----------------------------------------------------AGG-GUU-CCU-G-UC-CAACG-UUA-AU-C--GG--GGCAGGGU--GAGU-CGAC-C-CCUAAGGUGAG--GC-C-----GAAA---G-G-C-GU-AAUCG--AUGG-GAAG-CAG-G--UU-AAUAUUC-CUGCAC-ga-c--uu-gua-auu-----------------------------------------------------------------------------------------------------------------------------gcgau------g-ggg--gga-cggag--aaggcua--ggug-g---g-cc-ag-g-----cg--a--cgg-u-ug----u-----------------------------------------------------------------------------------------------------------c--c-uggu--gaaa-----------------gugc-g--uaggu--------------------------------------------gguguu-ucua-gg-ca-aa---u--cc--g--gagacacaa----------------------------------------------------------------------------------------------------------------------------------------------cacu--ga--gacacg-a-ga-c-gaa---------------------------------------------------cgc-ac---uac--g-----gugcg------------------------------------g-aag----ccauu--gaugcc--cug--c-uu-cc-aggaaa-agccuc--uaagcuuca-----------------------------------------------------------------------------------------------------------------ga-u-uac-aa---gu----cAU-CGUA-CCCCAAACCGACACAGGUGG-UCGGGU-A-GAGAA-UACCAA-GGCGCUUGAG-AGAA-CUCGGGUG---------------AAGGAA-CUAGG-CA----------AAAUAGA-ACC-GUAAC--UUCG-GG-AG-AAGGUUC-G-CUCUUga--cag-u-g--------aa-gucc---cuugc---ggau-g---------gagcag-u-uGGGAG-UCGC-AGUGA-CCAGAUG-GC-UGGGACU-GUUUAUCAAAAACACAGCAC-UCUGCAAACACGAA-A------GUG-GA-C-GUAU-AGGGUGUGA-CACCUGCCCGGU-GCCG-GAAGG-UUAAUUGAUGG-GGUUA-GC-------G-CAA----------------GCGA-AGCUCUUGAUCGAAG-CCCCGGUAAAC-GGC-GGCC-GUAACUAUAACGGU-CCUAAGGUAGCG-AAAUU-CCUU-GUC-GGGUAAGUUCCGACCUGCACGAA-UGGU-GUAACCA-UGGCCAU-GCUG-UCU-CCAC-CCGAGACUCAGUGAA-AUC-GAAUU-CG-CCGUG--AA-GAU-G-CGGUGUACCCGCGGC-UAGACGGAAAGACCCCGUGAACCUU-UACUACAGCUUGGCACUGAACAUUG-AACCUACAU-GUGUAGGAUAGGUGG-GAGGCUUU-GAA-G------CGA-UAACGCUAGUUGUCGU-GGAGCCGUC-C-UUGAAAUACCACCCU----UG-UAUGUUU-GAUG-UUCUAA-CGC-AG-G----GCCC--UGAAUCGGGCUC-GCG-GACAGUGCCUGGUGGG-UAGU-UUGAC-U-GGGGCGGUCUCC-U-CCCAA-AGAGUA-ACGGAGGAGCACGAAG-GUUGGCUAAUCCUGGUCGGACAUCAGGA-GGU---UAGUGCAAUGGCAUAA-GC-CAGCUUAACUGCGAGACGGACAGGUCGAGCAGGUACGAAAGU-AGG-UCAUAGUGAUC-CGGUGGUU-CU-G-AAUGGAAGGGCCAUCGCUCAAC-GGAUAAAAGGUA-CUC-CGGG-G-AU-AACAG-GCUGA--UACCGCCCAAG-A-G-UUC-AUA-UCGACGGCG-GU-GU-UUGGCACCU-CGAUGUCGGCUCAUCACAUCCUGGGGCUGAAGU---C-GGUC-CC-AAGGGU-AU-GGCU-GUU-CGC--CAUUUA-AAGUGGU-AC-G-CGA-GCUGGGUUCA-GAACGU-CGUGA-GACAGUU-CGG-U-CCCU-AU-CUGCCGUGGG-CG-UUGGAUGAUU-GA-A-GGGAGU-UGC--------------UCCUAGUACGAGA-GGACC-GGAGUGAA-CGAACCU--CUGGUGU--UCGGGUUGUCAC-GC-CA-GUGGCA-C-UGC-CCGGUA-GCU-AAGU-U-CGGAAUCGAUAACCGCUGAA---------------------------------------------------------------------------------------------------------------------------------------------------------------------------------------------------------------------------------------------------------------------------------------------------------------------------------------------------------------------------------------------------------------------------------------------------------------
>Accession:AY138851::SeqID:7199::TaxID:2
------------------------------------------------------------------------------------------------------------------------------------------------------------------------------------guuguauGGUU-AAGU-G-AC----UAA-GCG-UACA-CG-GUG-GAUG--CCU-UG-GC-AG-UCAG-A-GGC-GAUGAAG-GA--C-GU-ACUAA--CC-U-GC-G-AUAA-GCC-G-UGAU--GAGUC-G-GU-AAGA----GAC-GC-UAUCAAUCACGG-AUU-UC-CGAAUGGGGAAA-CCC--A-CC-cgag-------------------------------------------------------------------------------------------------------------------------------------------------------------------------------------------------------------------------------------------auaa-------cucg------GG--ua-ucuguuac--U-----------------------------------------------------------------------------------------------------------------------------------------------------------------------------------------------------------------------------------------------GA-AUA-CA--UA----GGU-AA-C----A-G--A-GG-C-AAACCG-GGA-G-AACUGAAACAUCU-AA-GUA-CCCCGAG-GAAAAGA-AA-UC-A-A--CC------GA-GAUUCC-CU-CAG-UAGC-GGCG-AGCGA-ACG-GGGA-UUA-GCCCU---------------------------------------------------------------------------------------------------------------------------------------------------ua-----------------------------------------------------------------------------------------------------------------------------------------------agcagcgggg-gcgcu---ag-ug-gaac-g--gu-c-u-ggaa-a-g-gccg-GCGAUAC-AGGG-UGAUAGCCCCGU-A-CAC-gaa-agcaaa-cc-cgaugu-----------ga--aa-uc-------------------------------------------------------------------------------GAGUA-GGG-C-GGGA--CAC-GUG-AUAUCCU-GU-C-U-GAAUAU--GGG-GGGACCAU--CC-UCC-AAGG-CUAA----AUA-CUCC-UGACUGACC-GAUAGUG-AACC-AGUA-CCGUGA-GG-GA-AAGGCGAAAA-GAACCCC-UGUGA-GGGGA--GUGAAA-UAGAACCUGAAA-CCGU--GUACGUACAA-G-C-AGUG-GGA-GC-CC----------------------------------------------------------------------------------------------------------------------------------------------------------------------------------------------------------------------------------------------------------------------------------------------------------------------------------------------------------------------------------------------------------------------------------------------------------------------------------------------------------------------------------------------------------------------uucg--------------------------------------------------GG--G-UGAC-UGCGUACCU-U-UUG-UAUAAUGGGUCAGCGACUU-AC-A-UUC-UGU-AGC----GAGGUUAA-CC--------GUAUA---GG-GG-AGCCGUA--GGGAAA-CCGAG-UCU-UAA---CUGGGCGA----------------------------------------------------------------------------------------------------------------------------------------------------------------------------------------------------------------------------------------------------------------------------------------------------------------------------------------------------auaG-UUGCAGG-GUGUA-GACCCG-AAAC-C-GG-GUGA-UCUAGCCAUGG-GCAGGUUGAA-GGU-UGAGUA-ACAU-CAACU-GGA-GGACCGAACC-CAC-UA-AC--GUUG-CAAAGUUA-GGGG-AUGAC-CUGUGGCUG-G-GGGU--GAAAGGCC-AAUCAAAC-UCGG-AG-AUAGC-UGGUUCU-CCCCG--AAAG-CUAU-UUAG-GUAGCGC-CUCGGA-CGa------A-UA-C--UA-CU-GGGGGUAG-AGC-ACU-GU-UAAGG-C-UA---GG-GGGUC--AUCCCGACUUACCAA-CCCUUU-GCAAACUCCGAA-UA-CCA-G-U-A--AGUAC----U-AUC-C-GGGAGACACAC--GGCGGGUGCUAACGUCCGU--CGUG-AAGA-GGG-AAACAA-CCCAGACCGCCGGCUAAG-GU-CCCA-AAGUU-CUGG-U-UAA-GUG--------GGAAACGAUGUG-GGA-AGGCUCA--GACA-G-CUAGG-AUG-UUGGCUUAGAAGCAGCCAU--CAUUUAAAGAAAGC-GUAA-UA--------G-CUCAC-UAGU-------CGA------G-U-CGG-CC--UG-CGCGG--AAGAU-GUAA-C-GGGG--CU--CAAACC-AGG-C--ACC-GAA-G-CCGC-GGau--uc-acac---------uau--------------------------------------------------------------------------------------------------------------------------------------------------------------------------------------------------------------------------------------------------------------------------------------------------------------------------------------------------------------------------------------------------------------------------------------------------------------------gug-u-ga--gu-GG-UAGG--GGA-G-----CGUU-CU-G-UAA-------------------------------------------------------------------------------------------------------------------------G-U-CUG-C-GAA-GG-UG-U-A-UC--GAGA----G-GU--A-UG-CUGGAG-AU-AU-CA-GAA-GUGC-GAA-UGC-UGA--CGUA-AGUA--ACG--AUAA-A-GGG-GGUGA-AAA-GCCUC-CU---CGCC-GGA-AGA-C-CA-----------------------------------------------------AGG-GUU-CCU-G-UC-CAACG-UUA-AU-C--GG--GGCAGGGU--GAGU-CGAC-C-CCUAAGGUGAG--GC-C-----GAAA---G-G-C-GU-AAUCG--AUGG-GAAG-CAG-G--UU-AAUAUUC-CUGCAC-ga-c--uu-gua-auu-----------------------------------------------------------------------------------------------------------------------------gcgau------g-ggg--gga-cggag--aaggcua--ggug-g---g-cc-ag-g-----cg--a--cgg-u-ug----u-----------------------------------------------------------------------------------------------------------c--c-uggu--gaaa-----------------gggu-g--uaggc--------------------------------------------gguauc-ucua-gg-ca-aa---u--cc--g--gagaugcaa----------------------------------------------------------------------------------------------------------------------------------------------cgcu--ga--gaccug-a-ga-c-gaa---------------------------------------------------gcc-ac---uac--g-----guggu------------------------------------g-aag----ccauu--gaugcc--cug--c-uu-cc-aggaaa-agccuc--uaagcuuca-----------------------------------------------------------------------------------------------------------------ga-u-uac-aa---gu----cAU-CGUA-CCCCAAACCGACACAGGUGG-UCGGGU-A-GAGAA-UACCAA-GGCGCUUGAG-AGAA-CUCGGGUG---------------AAGGAA-CUAGG-CA----------AAAUAGU-ACC-GUAAC--UUCG-GG-AG-AAGGUAC-G-CUCUUga--ugg-u-g--------aa-guga---cuugc---ucac-g---------gagcug-u-cGGGAG-UCGC-AGUGA-CCAGAUG-GC-UGGGACU-GUUUAUCAAAAACACAGCAC-UCUGCAAACACGAA-A------GUG-GA-C-GUAU-AGGGUGUGA-CACCUGCCCGGU-GCCG-GAAGG-UUAAUUGAUGG-GGUUA-GC-------G-CAA----------------GCGA-AGCUCUUGAUCGAAG-CCCCGGUAAAC-GGC-GGCC-GUAACUAUAACGGU-CCUAAGGUAGCG-AAAUU-CCUU-GUC-GGGUAAGUUCCGACCUGCACGAA-UGGU-GUAACCA-UGGCCAU-GCUG-UCU-CCAC-CCGAGACUCAGUGAA-AUC-GAAAU-CG-CCGUG--AA-GAU-G-CGGUGUACCCGCGGC-UAGACGGAAAGACCCCGUGAACCUU-UACUACAGCUUGGCACUGAACAUUG-AACCUACAU-GUGUAGGAUAGGUGG-GAGGCUUU-GAA-G------CGA-UGACGCUAGUUGUCGU-GGAGCCGUC-C-UUGAAAUACCACCCU----UG-UAUGUUU-GAUG-UUCUAA-CGC-AG-G----UCCC--UGAAUCGGGAUC-GCG-GACAGUGCCUGGUGGG-UAGU-UUGAC-U-GGGGCGGUCUCC-U-CCCAA-AGAGUA-ACGGAGGAGCACGAAG-GUUGGCUAAUCCUGGUCGGACAUCAGGA-GGU---UAGUGCAAUGGCAUAA-GC-CAGCUUAACUGCGAGACGGACAGGUCGAGCAGGUGCGAAAGC-AGG-UCAUAGUGAUC-CGGUGGUU-CU-G-UAUGGAAGGGCCAUCGCUCAAC-GGAUAAAAGGUA-CUC-CGGG-G-AU-AACAG-GCUGA--UACCGCCCAAG-A-G-UUC-AUA-UCGACGGCG-GU-GU-UUGGCACCU-CGAUGUCGGCUCAUCACAUCCUGGGGCUGAAGU---U-GGUC-CC-AAGGGU-AU-GGCU-GUU-CGC--CAUUUA-AAGUGGU-AC-G-CGA-GCUGGGUUCA-GAACGU-CGUGA-GACAGUU-CGG-U-CCCU-AU-CUGCCGUGGG-CG-UUGGAUGAUU-GA-A-GGGAGU-UGC--------------UCCUAGUACGAGA-GGACC-GGAGUGAA-CGAACCU--CUGGUGU--UCGGGUUGUCAC-GC-CA-GUGGCA-C-UGC-CCGGUA-GCU-AAGU-U-CGGAAUCGAUAACCGCUGAAAGCAUCUAAGC-GUGAA----------------------------------------------------------------------------------------------------------------------------------------------------------------------------------------------------------------------------------------------------------------------------------------------------------------------------------------------------------------------------------------------------------------------------------------------
>Accession:AF508088::SeqID:7456::TaxID:2
------------------------------------------------------------------------------------------------------------------------------------------------------------------------------------guuguauGGUU-AAGU-G-AC----UAA-GCG-UACA-UG-GUG-GAUG--CCU-UG-GC-AG-UCAG-A-GGC-GAUGAAG-GA--C-GU-ACUAA--CC-U-GC-G-AUAA-GCU-G-UGAG--AAGUC-G-GU-AAGA----GAC-GC-UAUUACUCACAG-AUU-UC-CGAAUGGGGAAA-CCC--A-CC-CAGC-------------------------------------------------------------------------------------------------------------------------------------------------------------------------------------------------------------------------------------------acaa---------GCUG--G-GU--AUCU-A-UUAC--U-----------------------------------------------------------------------------------------------------------------------------------------------------------------------------------------------------------------------------------------------GA-AUA-CA--UA----GGU-AA-U----A-G--A-GG-C-GAACCG-GGA-G-AACUGAAACAUCU-AA-GUA-CCCCGAG-GAAAAGA-AA-UC-A-A--CC------GA-GAUUCC-CU-UAG-UAGC-GGCG-AGCGA-ACG-GGGA-UUA-GCCCU---------------------------------------------------------------------------------------------------------------------------------------------------uaaguu-----------------------------------------------------------------------------------------------------------------------------------------------uc-uug-gaaguu--aG-UG-GAAU-G-G-U-C-CUGGAA-A-G-GCCA-GCGAUAC-AGGG-UGAUAGCCCCGU-A-CAU-gaa-aacgac-cu-uga-------------------------------------------------agugaaauc--------------------------------------------GAGUA-GGG-C-GGGA--CAC-GUG-ACAUCCU-GU-C-U-GAAUAU--GGG-GGGACCAU--CC-UCC-AAGG-CUAA----AUA-CUCC-UGACUGACC-GAUAGUG-AACC-AGUA-CCGUGA-GG-GA-AAGGCGAAAA-GAACCCC-UGUGA-GGGGA--GUGAAA-UAGAACCUGAAA-CCGU--GUACGUACAA-G-C-AGUG-GGA-GC-CC----------------------------------------------------------------------------------------------------------------------------------------------------------------------------------------------------------------------------------------------------------------------------------------------------------------------------------------------------------------------------------------------------------------------------------------------------------------------------------------------------------------------------------------------------------------------uucg--------------------------------------------------GG--G-UGAC-UGCGUACCU-U-UUG-UAUAAUGGGUCAGCGACUU-AC-A-UUU-UGU-AGC----GAGGUUAA-CC--------GUAUA---GG-GG-AGCCGUA--GGGAAA-CCGAG-UCU-UAA---CUGGGCGU----------------------------------------------------------------------------------------------------------------------------------------------------------------------------------------------------------------------------------------------------------------------------------------------------------------------------------------------------cuaG-UUGCAAG-GUGUA-GACCCG-AAAC-C-GG-GUGA-UCUAGCCAUGG-GCAGGUUGAA-GGU-UGAGUA-ACAU-CAACU-GGA-GGACCGAACC-CAC-UA-AC--GUUG-CAAAGUUA-GGGG-AUGAC-CUGUGGCUG-G-GGGU--GAAAGGCC-AAUCAAAC-UCGG-AG-AUAGC-UGGUUCU-CCCCG--AAAG-CUAU-UUAG-GUAGCGC-CUCGGA-CGa------A-UA-C--UA-CU-GGGGGUAG-AGC-ACU-GU-UUGGA-C-UA---GG-GGGUC--AUCCCGACUUACCAA-CUCCAU-GCAAACUCCGAA-UA-CCA-G-U-A--AGUAA----U-AUC-C-GGGAGACACAC--GGCGGGUGCUAACGUCCGU--CGUG-AAGA-GGG-AAACAA-CCCAGACCGCCGGCUAAG-GU-CCCA-AAGUU-CUGG-U-UAA-GUG--------GGAAACGAUGUG-GGA-AGGCUCA--GACA-G-CUAGG-AUG-UUGGCUUAGAAGCAGCCAU--CAUUUAAAGAAAGC-GUAA-UA--------G-CUCAC-UAGU-------CGA------G-U-CGG-CC--UG-CGCGG--AAGAU-GUAA-C-GGGG--CU--CAAACC-AGG-C--ACC-GAA-G-CCGC-GGau--uc-ac------------------------------------------------------------------------------------------------------------------------------------------------------------------------------------------------------------------------------------------------------acuuaugu----------------------------------------------------------------------------------------------------------------------------------------------------------------------------------------------------------------------g-u-ga--gu-GG-UAGG--GGA-G-----CGUU-CU-G-UAA-------------------------------------------------------------------------------------------------------------------------G-U-CUG-C-GAA-GG-UG-U-A-UC--GAGA----G-GU--A-UG-CUGGAG-AU-AU-CA-GAA-GUGC-GAA-UGC-UGA--CGUA-AGUA--ACG--AUAA-A-GGG-GGUGA-AAA-GCCUC-CU---CGCC-GGA-AGA-C-CA-----------------------------------------------------AGG-GUU-CCU-G-UC-CAACG-UUA-AU-C--GG--GGCAGGGU--GAGU-CGAC-C-CCUAAGGUGAG--GC-C-----GAAA---G-G-C-GU-AAUCG--AUGG-GAAG-CAG-G--UU-AAUAUUC-CUGCAC-ga-c--uu-gua-auu-----------------------------------------------------------------------------------------------------------------------------gcgau------g-ggg--gga-cggag--aaggcua--ggug-g---g-cc-ag-g-----cg--a--cgg-u-ug----u-----------------------------------------------------------------------------------------------------------c--c-uggu--gaaa-----------------gugc-g--uaggc--------------------------------------------gguauc-ucua-gg-ca-aa---u--cc--g--gagauacaa----------------------------------------------------------------------------------------------------------------------------------------------cgcu--ga--gacacg-a-ga-c-gaa---------------------------------------------------gcc-ac---uac--g-----guggu------------------------------------g-aag----ccauu--gaugcc--cug--c-uu-cc-aggaaa-agccuc--uaagcuuca-----------------------------------------------------------------------------------------------------------------ga-u-uac-aa---gu----cAU-CGUA-CCCCAAACCGACACAGGUGG-UCGGGU-A-GAGAA-UACCAA-GGCGCUUGAG-AGAA-CUCGGGUG---------------AAGGAA-CUAGG-CA----------AAAUAGA-ACC-GUAAC--UUCG-GG-AG-AAGGUUC-G-CUCUUga--cag-u-g--------aa-gucc---cuugc---ggau-g---------gagcag-u-uGGGAG-UCGC-AGUGA-CCAGAUG-GC-UGGGACU-GUUUAUCAAAAACACAGCAC-UCUGCAAACACGAA-A------GUG-GA-C-GUAU-AGGGUGUGA-CACCUGCCCGGU-GCCG-GAAGG-UUAAUUGAUGG-GGUUA-GC-------G-CAA----------------GCGA-AGCUCUU-AUCGAAG-CCCCGGU-AAC-GGC-GGCC-GUAACUAUAACGGU-CCUAAGGUAGCG-AAAUU-CCUU-GUC-GGGUAAGUUCCGACCUGCACCAA-UGGU-GUAACCA-UGGCCAU-GCUG-UCU-CCAC-CCGAGACUCAGUGAA-AUC-GAAUU-CG-CCGUG--AA-GAU-G-CGGUGUACCCGCGGC-UAGACGGAAAGACCCCGUGAACCUU-UACUACAGCUUGGCACUGAACAUUG-AACCUACAU-GUGUAGGAUAGGUGG-GAGGCUUU-GAA-G------GCG-UGACGCCAGUUGCGCU-GGAGCCGUC-C-UUGAAAUACCACCCU----UG-UAUGUUU-GAUG-UUCUAA-CGC-AG-G----GCCC--UGAAUCGGGCUC-GCG-GACAGUGCCUGGUGGG-UAGU-UUGAC-U-GGGGCGGUCUCC-U-CCCAA-AGAGUA-ACGGAGGAGCACGAAG-GUUGGCUAAUCCUGGUCGGACAUCAGGA-GGU---UAGUGCAAUGGCAUAA-GC-CAGCUUAACUGCGAGACGGACAGGUCGAGCAGGUACGAAAGU-AGG-UCAUAGUGAUC-CGGUGGUU-CU-G-AAUGGAAGGGCCAUCGCUCAAC-GGAUAAAAGGUA-CUC-CGGG-G-AU-AACAG-GCUGA--U-CCGCCCAAG-A-G-UUC-AUA-UCGACGGCG-GU-GU-UUGGCACCU-CGAUGUCGGCUCAUCACAUCCUGGGGCUGAAGU---C-GGUC-CC-AAGGGU-AU-GGCU-GUU-CGC--CAUUUA-AAGUGGU-AC-G-CGA-GCUGGGUUCA-GAACGU-CGUGA-GACAGUU-CGG-U-CCCU-AU-CUGCCGUGGG-CG-UUGGAUGAUU-GA-A-GGGAGU-UGC--------------UCCUAGUACGAGA-GGACC-GGAGUGAA-CGAACCU--CUGGUGU--UCGGGUUGUCAC-GC-CA-GUGGCA-C-UGC-CCGGUA-GCU-AAGU-U-CGGAAUCGAUAACCGCUGAAAGCAUCUAAGC-GUGAA----------------------------------------------------------------------------------------------------------------------------------------------------------------------------------------------------------------------------------------------------------------------------------------------------------------------------------------------------------------------------------------------------------------------------------------------
>Accession:AF516266::SeqID:7457::TaxID:2
------------------------------------------------------------------------------------------------------------------------------------------------------------------------------------guuguauGGUU-AAGU-G-AC----UAA-GCG-UACA-UG-GUG-GAUG--CCU-UG-GC-AG-UCAG-A-GGC-GAUGAAG-GA--C-GU-ACUAA--CC-U-GC-G-AUAA-GCU-G-UGAG--AAGUC-G-GU-AAGA----GAC-GC-UAUUACUCACAG-AUU-UC-CGAAUGGGGAAA-CCC--A-CC-CGAG-------------------------------------------------------------------------------------------------------------------------------------------------------------------------------------------------------------------------------------------auaa---------CUCG--G-GU--AUCU-G-UUAC--U-----------------------------------------------------------------------------------------------------------------------------------------------------------------------------------------------------------------------------------------------GA-AUA-CA--UA----GGU-AA-C----A-G--A-GG-C-GAACCG-GGA-G-AACUGAAACAUCU-AA-GUA-CCCCGAG-GAAAAGA-AA-UC-A-A--CC------GA-GAUUCC-CU-CAG-UAGC-GGCG-AGCGA-ACG-GGGA-UUA-GCCCU---------------------------------------------------------------------------------------------------------------------------------------------------ua-----------------------------------------------------------------------------------------------------------------------------------------------agcauc-uug-gaaguu--aG-UG-GAAC-G-G-U-C-CUGGAA-A-G-GCCG-GCGAUAC-AGGG-UGAUAGCCCCGU-A-CAC-gaa-aacaac-cu-ugaugu-----------ga--aa-uc-------------------------------------------------------------------------------GAGUA-GGG-C-GGGA--CAC-GUG-ACAUCCU-GU-C-U-GAAUAU--GGG-GGGACCAU--CC-UCC-AAGG-CUAA----AUA-CUCC-UGACUGACC-GAUAGUG-AACC-AGUA-CCGUGA-GG-GA-AAGGCGAAAA-GAACCCC-UGUGA-GGGGA--GUGAAA-UAGAACCUGAAA-CCGU--GUACGUACAA-G-C-AGUG-GGA-GC-CC----------------------------------------------------------------------------------------------------------------------------------------------------------------------------------------------------------------------------------------------------------------------------------------------------------------------------------------------------------------------------------------------------------------------------------------------------------------------------------------------------------------------------------------------------------------------uucg--------------------------------------------------GG--G-UGAC-UGCGUACCU-U-UUG-UAUAAUGGGUCAGCGACUU-AC-A-UUU-UGU-AGC----GAGGUUAA-CC--------GUAUA---GG-GG-AGCCGUA--GGGAAA-CCGAG-UCU-UAA---CUGGGCGU----------------------------------------------------------------------------------------------------------------------------------------------------------------------------------------------------------------------------------------------------------------------------------------------------------------------------------------------------cuaG-UUGCAAG-GUGUA-GACCCG-AAAC-C-GG-GUGA-UCUAGCCAUGG-GCAGGUUGAA-GGU-UGAGUA-ACAU-CAACU-GGA-GGACCGAACC-CAC-UA-AC--GUUG-CAAAGUUA-GGGG-AUGAC-CUGUGGCUG-G-GGGU--GAAAGGCC-AAUCAAAC-UCGG-AG-AUAGC-UGGUUCU-CCCCG--AAAG-CUAU-UUAG-GUAGCGC-CUCGGA-CGa------A-UA-C--UA-CU-GGGGGUAG-AGC-ACU-GU-UUGGG-C-UA---GG-GGGUC--AUCCCGACUUACCAA-CCCCAU-GCAAACUCCGAA-UA-CCA-G-U-A--AGUAA----U-AUC-C-GGGAGACACAC--GGCGGGUGCUAACGUCCGU--CGUG-AAGA-GGG-AAACAA-CCCAGACCGCCGGCUAAG-GU-CCCA-AAGUU-CUGG-U-UAA-GUG--------GGAAACGAUGUG-GGA-AGGCUCA--GACA-G-CUAGG-AUG-UUGGCUUAGAAGCAGCCAU--CAUUUAAAGAAAGC-GUAA-UA--------G-CUCAC-UAGU-------CGA------G-U-CGG-CC--UG-CGCGG--AAGAU-GUAA-C-GGGG--CU--CAAACC-AGG-C--ACC-GAA-G-CCGC-GGau--uc-ac------------------------------------------------------------------------------------------------------------------------------------------------------------------------------------------------------------------------------------------------------acuuaugu----------------------------------------------------------------------------------------------------------------------------------------------------------------------------------------------------------------------g-u-ga--gu-GG-UAGG--GGA-G-----CGUU-CU-G-UAA-------------------------------------------------------------------------------------------------------------------------G-U-CUG-C-GAA-GG-UG-U-A-UC--GAGA----G-GU--A-UG-CUGGAG-AU-AU-CA-GAA-GUGC-GAA-UGC-UGA--CGUA-AGUA--ACG--AUAA-A-GGG-GGUGA-AAA-GCCUC-CU---CGCC-GGA-AGA-C-CA-----------------------------------------------------AGG-GUU-CCU-G-UC-CAACG-UUA-AU-C--GG--GGCAGGGU--GAGU-CGAC-C-CCUAAGGCGAG--GC-C-----GAAA---G-G-C-GU-AGUCG--AUGG-GAAG-CAG-G--UU-AAUAUUC-CUGCAC-ga-c--uu-gua-auu-----------------------------------------------------------------------------------------------------------------------------gcgau------g-ggg--gga-cggag--aaggcua--ggug-g---g-cc-ag-g-----cg--a--cgg-u-ug----u-----------------------------------------------------------------------------------------------------------c--c-uggu--gaaa-----------------gugc-g--uaggu--------------------------------------------gguguu-ugua-gg-ca-aa---u--cc--g--cagacacaa----------------------------------------------------------------------------------------------------------------------------------------------cacu--ga--gacacg-a-ga-c-gaa---------------------------------------------------cac-ac---uac--g-----gugug------------------------------------g-aag----ccauu--gaugcc--cug--c-uu-cc-aggaaa-agccuc--uaagcuuca-----------------------------------------------------------------------------------------------------------------ga-u-uac-aa---gu----cAU-CGUA-CCCCAAACCGACACAGGUGG-UCGGGU-A-GAGAA-UACCAA-GGCGCUUGAG-AGAA-CUCGGGUG---------------AAGGAA-CUAGG-CA----------AAAUAGA-ACC-GUAAC--UUCG-GG-AG-AAGGUUC-G-CUCUUga--ugg-u-g--------aa-gucc---cuugc---ggau-g---------gagcug-u-cGGGAG-UCGC-AGUGA-CCAGAUG-GC-UGGGACU-GUUUAUCAAAAACACAGCAC-UCUGCAAACACGAA-A------GUG-GA-C-GUAU-AGGGUGUGA-CACCUGCCCGGU-GCCG-GAAGG-UUAAUUGAUGG-GGUUA-GC-------G-CAA----------------GCGA-AGCUCUUGAUCGAAG-CCCCGGUAAAC-GGC-GGCC-GUAACUAUAACGGU-CCUAAGGUAGCG-AAAUU-CCUU-GUC-GGGUAAGUUCCGACCUGCACGAA-UGGU-GUAACCA-UGGCCAU-GCUG-UCU-CCAC-CCGAGACUCAGUGAA-AUC-GAAUU-CG-CCGUG--AA-GAU-G-CGGUGUACCCGCGGC-UAGACGGAAAGACCCCGUGAACCUU-UACUACAGCUUGGCACUGAACAUUG-AACCUACAU-GUGUAGGAUAGGUGG-GAGGCUUU-GAA-G------GCG-UGACGCCAGUUGCGCU-GGAGCCGUC-C-UUGAAAUACCACCCU----UG-UAUGUUU-GAUG-UUCUAA-CGC-AG-G----GCCC--UGAAUCGGGCUC-GCG-GACAGUGCCUGGUGGG-UAGU-UUGAC-U-GGGGCGGUCUCC-U-CCCAA-AGAGUA-ACGGAGGAGCACGAAG-GUUGGCUAAUCCUGGUCGGACAUCAGGA-GGU---UAGUGCAAUGGCAUAA-GC-CAGCUUAACUGCGAGACGGACAGGUCGAGCAGGUACGAAAGU-AGG-UCAUAGUGAUC-CGGUGGUU-CU-G-AAUGGAAGGGCCAUCGCUCAAC-GGAUAAAAGGUA-CUC-CGGG-G-AU-AACAG-GCUGA--UACCGCCCAAG-A-G-UUC-AUA-UCGACGGCG-GU-GU-UUGGCACCU-CGAUGUCGGCUCAUCACAUCCUGGGGCUGAAGU---C-GGUC-CC-AAGGGU-AU-GGCU-GUU-CGC--CAUUUA-AAGUGGU-AC-G-CGA-GCUGGGUUCA-GAACGU-CGUGA-GACAGUU-CGG-U-CCCU-AU-CUGCCGUGGG-CG-UUGGAUGAUU-GA-A-GGGAGU-UGC--------------UCCUAGUACGAGA-GGACC-GGAGUGAA-CGAACCU--CUGGUGU--UCGGGUUGUCAC-gc-ca-GUGGCA-C-UGC-CCGGUA-GCU-AAGU-U-CGGAAUCGAUAACCGCUGAAAGCAUCUAGCC-GUGAA----------------------------------------------------------------------------------------------------------------------------------------------------------------------------------------------------------------------------------------------------------------------------------------------------------------------------------------------------------------------------------------------------------------------------------------------
>Accession:AF516267::SeqID:7458::TaxID:2
------------------------------------------------------------------------------------------------------------------------------------------------------------------------------------guuguauGGUU-AAGU-G-AC----UAA-GCG-UACA-UG-GUG-GAUG--CCU-UG-GC-AG-UCAG-A-GGC-GAUGAAG-GA--C-GU-ACUAA--CC-U-GC-G-AUAA-GCU-G-UGAG--AAGUC-G-GU-AAGA----GAC-GC-UAUUACUCACAG-AUU-UC-CGAAUGGGGAAA-CCC--A-CC-CGAG-------------------------------------------------------------------------------------------------------------------------------------------------------------------------------------------------------------------------------------------auaa---------CUCG--G-GU--AUCU-G-UUAC--U-----------------------------------------------------------------------------------------------------------------------------------------------------------------------------------------------------------------------------------------------GA-AUA-CA--UA----GGU-AA-C----A-G--A-GG-C-GAACCG-GGA-G-AACUGAAACAUCU-AA-GUA-CCCCGAG-GAAAAGA-AA-UC-A-A--CC------GA-GAUUCC-CU-CAG-UAGC-GGCG-AGCGA-ACG-GGGA-UUA-GCCCU---------------------------------------------------------------------------------------------------------------------------------------------------ua-----------------------------------------------------------------------------------------------------------------------------------------------agcauc-uug-gaaguu--aG-UG-GAAC-G-G-U-C-CUGGAA-A-G-GCCG-GCGAUAC-AGGG-UGAUAGCCCCGU-A-CAC-gaa-aacaac-cu-ugaugu-----------ga--aa-uc-------------------------------------------------------------------------------GAGUA-GGG-C-GGGA--CAC-GUG-ACAUCCU-GU-C-U-GAAUAU--GGG-GGGACCAU--CC-UCC-AAGG-CUAA----AUA-CUCC-UGACUGACC-GAUAGUG-AACC-AGUA-CCGUGA-GG-GA-AAGGCGAAAA-GAACCCC-UGUGA-GGGGA--GUGAAA-UAGAACCUGAAA-CCGU--GUACGUACAA-G-C-AGUG-GGA-GC-CC----------------------------------------------------------------------------------------------------------------------------------------------------------------------------------------------------------------------------------------------------------------------------------------------------------------------------------------------------------------------------------------------------------------------------------------------------------------------------------------------------------------------------------------------------------------------uucg--------------------------------------------------GG--G-UGAC-UGCGUACCU-U-UUG-UAUAAUGGGUCAGCGACUU-AC-A-UUU-UGU-AGC----GAGGUUAA-CC--------GUAUA---GG-GG-AGCCGUA--GGGAAA-CCGAG-UCU-UAA---CUGGGCGU----------------------------------------------------------------------------------------------------------------------------------------------------------------------------------------------------------------------------------------------------------------------------------------------------------------------------------------------------cuaG-UUGCAAG-GUGUA-GACCCG-AAAC-C-GG-GUGA-UCUAGCCAUGG-GCAGGUUGAA-GGU-UGAGUA-ACAU-CAACU-GGA-GGACCGAACC-CAC-UA-AC--GUUG-CAAAGUUA-GGGG-AUGAC-CUGUGGCUG-G-GGGU--GAAAGGCC-AAUCAAAC-UCGG-AG-AUAGC-UGGUUCU-CCCCG--AAAG-CUAU-UUAG-GUAGCGC-CUCGGA-CGa------A-UA-C--UA-CU-GGGGGUAG-AGC-ACU-GU-UUGGG-C-UA---GG-GGGUC--AUCCCGACUUACCAA-CCCCAU-GCAAACUCCGAA-UA-CCA-G-U-A--AGUAA----U-AUC-C-GGGAGACACAC--GGCGGGUGCUAACGUCCGU--CGUG-AAGA-GGG-AAACAA-CCCAGACCGCCGGCUAAG-GU-CCCA-AAGUU-CUGG-U-UAA-GUG--------GGAAACGAUGUG-GGA-AGGCUCA--GACA-G-CUAGG-AUG-UUGGCUUAGAAGCAGCCAU--CAUUUAAAGAAAGC-GUAA-UA--------G-CUCAC-UAGU-------CGA------G-U-CGG-CC--UG-CGCGG--AAGAU-GUAA-C-GGGG--CU--CAAACC-AGG-C--ACC-GAA-G-CCGC-GGau--uc-ac------------------------------------------------------------------------------------------------------------------------------------------------------------------------------------------------------------------------------------------------------acuuaugu----------------------------------------------------------------------------------------------------------------------------------------------------------------------------------------------------------------------g-u-ga--gu-GG-UAGG--GGA-G-----CGUU-CU-G-UAA-------------------------------------------------------------------------------------------------------------------------G-U-CUG-C-GAA-GG-UG-U-A-UC--GAGA----G-GU--A-UG-CUGGAG-AU-AU-CA-GAA-GUGC-GAA-UGC-UGA--CGUA-AGUA--ACG--AUAA-A-GGG-GGUGA-AAA-GCCUC-CU---CGCC-GGA-AGA-C-CA-----------------------------------------------------AGG-GUU-CCU-G-UC-CAACG-UUA-AU-C--GG--GGCAGGGU--GAGU-CGAC-C-CCUAAGGCGAG--GC-C-----GAAA---G-G-C-GU-AGUCG--AUGG-GAAG-CAG-G--UU-AAUAUUC-CUGCAC-ga-c--uu-gua-auu-----------------------------------------------------------------------------------------------------------------------------gcgau------g-ggg--gga-cggag--aaggcua--ggug-g---g-cc-ag-g-----cg--a--cgg-u-ug----u-----------------------------------------------------------------------------------------------------------c--c-uggu--gaaa-----------------gugc-g--uaugu--------------------------------------------gguguu-ugua-gg-ca-aa---u--cc--g--cagacacaa----------------------------------------------------------------------------------------------------------------------------------------------cacu--ga--gacacg-a-ga-c-gaa---------------------------------------------------cac-ac---uac--g-----gugug------------------------------------g-aag----ccauu--gaugcc--cug--c-uu-cc-aggaaa-agccuc--uaagcuuca-----------------------------------------------------------------------------------------------------------------ga-u-uac-aa---gu----cAU-CGUA-CCCCAAACCGACACAGGUGG-UCGGGU-A-GAGAA-UACCAA-GGCGCUUGAG-AGAA-CUCGGGUG---------------AAGGAA-CUAGG-CA----------AAAUAGA-ACC-GUAAC--UUCG-GG-AG-AAGGUUC-G-CUCUUga--ugg-u-g--------aa-gucc---cuugc---ggau-g---------gagcug-u-cGGGAG-UCGC-AGUGA-CCAGAUG-GC-UGGGACU-GUUUAUCAAAAACACAGCAC-UCUGCAAACACGAA-A------GUG-GA-C-GUAU-AGGGUGUGA-CACCUGCCCGGU-GCCG-GAAGG-UUAAUUGAUGG-GGUUA-GC-------G-CAA----------------GCGA-AGCUCUUGAUCGAAG-CCCCGGUAAAC-GGC-GGCC-GUAACUAUAACGGU-CCUAAGGUAGCG-AAAUU-CCUU-GUC-GGGUAAGUUCCGACCUGCACGAA-UGGU-GUAACCA-UGGCCAU-GCUG-UCU-CCAC-CCGAGACUCAGUGAA-AUC-GAAUU-CG-CCGUG--AA-GAU-G-CGGUGUACCCGCGGC-UAGACGGAAAGACCCCGUGAACCUU-UACUACAGCUUGGCACUGAACAUUG-AACCUACAU-GUGUAGGAUAGGUGG-GAGGCUUU-GAA-G------GCG-UGACGCCAGUUGCGCU-GGAGCCGUC-C-UUGAAAUACCACCCU----UG-UAUGUUU-GAUG-UUCUAA-CGC-AG-G----GCCC--UGAAUCGGGCUC-GCG-GACAGUGCCUGGUGGG-UAGU-UUGAC-U-GGGGCGGUCUCC-U-CCCAA-AGAGUA-ACGGAGGAGCACGAAG-GUUGGCUAAUCCUGGUCGGACAUCAGGA-GGU---UAGUGCAAUGGCAUAA-GC-CAGCUUAACUGCGAGACGGACAGGUCGAGCAGGUACGAAAGU-AGG-UCAUAGUGAUC-CGGUGGUU-CU-G-AAUGGAAGGGCCAUCGCUCAAC-GGAUAAAAGGUA-CUC-CGGG-G-AU-AACAG-GCUGA--UACCGCCCAAG-A-G-UUC-AUA-UCGACGGCG-GU-GU-UUGGCACCU-CGAUGUCGGCUCAUCACAUCCUGGGGCUGAAGU---C-GGUC-CC-AAGGGU-AU-GGCU-GUU-CGC--CAUUUA-AAGUGGU-AC-G-CGA-GCUGGGUUCA-GAACGU-CGUGA-GACAGUU-CGG-U-CCCU-AU-CUGCCGUGGG-CG-UUGGAUGAUU-GA-A-GGGAGU-UGC--------------UCCUAGUACGAGA-GGACC-GGAGUGAA-CGAACCU--CUGGUGU--UCGGGUUGUCAC-GC-CA-GUGGCA-C-UGC-CCGGUA-GCU-AAGU-U-CGGAAUCGAUAACCGCUGAAAGCAUCUAAGC-GUGAA----------------------------------------------------------------------------------------------------------------------------------------------------------------------------------------------------------------------------------------------------------------------------------------------------------------------------------------------------------------------------------------------------------------------------------------------
>Accession:AF407378::SeqID:7459::TaxID:2
------------------------------------------------------------------------------------------------------------------------------------------------------------------------------------guuguauGGUU-AAGU-G-AC----UAA-GCG-UACA-UG-GUG-GAUG--CCU-UG-GC-AG-UCAG-A-GGC-GAUGAAG-GA--C-GU-ACUAA--CC-U-GC-G-AUAA-GCU-G-UGAG--AAGUC-G-GU-AAGA----GAC-GC-UAUUACUCACAG-AUU-UC-CGAAUGGGGAAA-CCC--A-CC-CAAG-------------------------------------------------------------------------------------------------------------------------------------------------------------------------------------------------------------------------------------------auaa---------CUUG--G-GU--AUCG-U-UACA--U-----------------------------------------------------------------------------------------------------------------------------------------------------------------------------------------------------------------------------------------------GA-AUA-CA--UA----GUG-UA-A----C-G--A-GG-C-GAACCG-GGA-G-AACUGAAACAUCU-AA-GUA-CCCCGAG-GAAAAGA-AA-UC-A-A--CC------GA-GAUUCC-CU-CAG-UAGC-GGCG-AGCGA-ACG-GGGA-UUA-GCCCU---------------------------------------------------------------------------------------------------------------------------------------------------ua-----------------------------------------------------------------------------------------------------------------------------------------------agcauc-uug-gaaguu--aG-UG-GAAC-G-G-U-C-CUGGAA-A-G-GCCG-GCGAUAC-AGGG-UGAUAGCCCCGU-A-CAC-gaa-aacaac-cu-ugaugu-----------ga--aa-uc-------------------------------------------------------------------------------GAGUA-GGG-C-GGGA--CAC-GUG-ACAUCCU-GU-C-U-GAAUAU--GGG-GGGACCAU--CC-UCC-AAGG-CUAA----AUA-CUCC-UGACUGACC-GAUAGUG-AACC-AGUA-CCGUGA-GG-GA-AAGGCGAAAA-GAACCCC-UGUGA-GGGGA--GUGAAA-UAGAACCUGAAA-CCGU--GUACGUACAA-G-C-AGUG-GGA-GC-CC----------------------------------------------------------------------------------------------------------------------------------------------------------------------------------------------------------------------------------------------------------------------------------------------------------------------------------------------------------------------------------------------------------------------------------------------------------------------------------------------------------------------------------------------------------------------uucg--------------------------------------------------GG--G-UGAC-UGCGUACCU-U-UUG-UAUAAUGGGUCAGCGACUU-AC-A-UUU-UGU-AGC----GAGGUUAA-CC--------GUAUA---GG-GG-AGCCGUA--GGGAAA-CCGAG-UCU-UAA---CUGGGCGU----------------------------------------------------------------------------------------------------------------------------------------------------------------------------------------------------------------------------------------------------------------------------------------------------------------------------------------------------cuaG-UUGCAAG-GUGUA-GACCCG-AAAC-C-GG-GUGA-UCUAGCCAUGG-GCAGGUUGAA-GGU-UGAGUA-ACAU-CAACU-GGA-GGACCGAACC-CAC-UA-AC--GUUG-CAAAGUUA-GGGG-AUGAC-CUGUGGCUG-G-GGGU--GAAAGGCC-AAUCAAAC-UCGG-AG-AUAGC-UGGUUCU-CCCCG--AAAG-CUAU-UUAG-GUAGCGC-CUCGGA-CGa------A-UA-C--UA-CU-GGGGGUAG-AGC-ACU-GU-UUGGG-C-UA---GG-GGGUC--AUCCCGACUUACCAA-CCCCAU-GCAAACUCCGAA-UA-CCA-G-U-A--AGUAA----U-AUC-C-GGGAGACACAC--GGCGGGUGCUAACGUCCGU--CGUG-AAGA-GGG-AAACAA-CCCAGACCGCCGGCUAAG-GU-CCCA-AAGUU-CUGG-U-UAA-GUG--------GGAAACGAUGUG-GGA-AGGCUCA--GACA-G-CUAGG-AUG-UUGGCUUAGAAGCAGCCAU--CAUUUAAAGAAAGC-GUAA-UA--------G-CUCAC-UAGU-------CGA------G-U-CGG-CC--UG-CGCGG--AAGAU-GUAA-C-GGGG--CU--CAAACC-AGG-C--ACC-GAA-G-CCGC-GGau--uc-ac------------------------------------------------------------------------------------------------------------------------------------------------------------------------------------------------------------------------------------------------------acuuaugu----------------------------------------------------------------------------------------------------------------------------------------------------------------------------------------------------------------------g-u-ga--gu-GG-UAGG--GGA-G-----CGUU-CU-G-UAA-------------------------------------------------------------------------------------------------------------------------G-U-CUG-C-GAA-GG-UG-U-A-UC--GAGA----G-GU--A-UG-CUGGAG-AU-AU-CA-GAA-GUGC-GAA-UGC-UGA--CGUA-AGUA--ACG--AUAA-A-GGG-GGUGA-AAA-GCCUC-CU---CGCC-GGA-AGA-C-CA-----------------------------------------------------AGG-GUU-CCU-G-UC-CAACG-UUA-AU-C--GG--GGCAGGGU--GAGU-CGAC-C-CCUAAGGCGAG--GC-C-----GAAA---G-G-C-GU-AGUCG--AUGG-GAAG-CAG-G--UU-AAUAUUC-CUGCAC-ga-c--uu-gua-auu-----------------------------------------------------------------------------------------------------------------------------gcgau------g-ggg--gga-cggag--aaggcua--ggug-g---g-cc-ag-g-----cg--a--cgg-u-ug----u-----------------------------------------------------------------------------------------------------------c--c-uggu--gaaa-----------------gugc-g--uagu---------------------------------------------gguguu-ucua-gg-ca-aa---u--cc--g--gagacacaa----------------------------------------------------------------------------------------------------------------------------------------------cacu--ga--gacacg-a-ga-c-gaa---------------------------------------------------cac-ac---uac--g-----gugugg-----------------------------------g-aag----ccauu--aaugcc--cug--c-uu-cc-aggaaa-agccuc--uaagcuuca-----------------------------------------------------------------------------------------------------------------ga-u-uac-aa---gu----cAU-CGUA-CCCCAAACCGACACAGGUGG-UCGGGU-A-GAGAA-UACCAA-GGCGCUUGAG-AGAA-CUCGGGUG---------------AAGGAA-CUAGG-CA----------AAAUAGA-ACC-GUAAC--UUCG-GG-AG-AAGGUUC-G-CUCUUga--ugg-u-g--------aa-gucc---cuugc---ggau-g---------gagcug-u-cGGGAG-UCGC-AGUGA-CCAGAUG-GC-UGGGACU-GUUUAUCAAAAACACAGCAC-UCUGCAAACACGAA-A------GUG-GA-C-GUAU-AGGGUGUGA-CACCUGCCCGGU-GCCG-GAAGG-UUAAUUGAUGG-GGUUA-GC-------G-CAA----------------GCGA-AGCUCUUGAUCGAAG-CCCCGGUAAAC-GGC-GGCC-GUAACUAUAACGGU-CCUAAGGUAGCG-AAAUU-CCUU-GUC-GGGUAAGUUCCGACCUGCACGAA-UGGU-GUAACCA-UGGCCAU-GCUG-UCU-CCAC-CCGAGACUCAGUGAA-AUC-GAAUU-CG-CCGUG--AA-GAU-G-CGGUGUACCCGCGGC-UAGACGGAAAGACCCCGUGAACCUU-UACUACAGCUUGGCACUGAACAUUG-AACCUACAU-GUGUAGGAUAGGUGG-GAGGCUUU-GAA-G------GCG-UGACGCCAGUUGCGCU-GGAGCCGUC-C-UUGAAAUACCACCCU----UG-UAUGUUU-GAUG-UUCUAA-CGC-AG-G----GCCC--UGAAUCGGGCUC-GCG-GACAGUGCCUGGUGGG-UAGU-UUGAC-U-GGGGCGGUCUCC-U-CCCAA-AGAGUA-ACGG-GGAGCGCGAAG-GUUGGCUAAUCCUGGUCGGACAUCAGGA-GGU---UAGUGCAAUGGCAUAA-GC-CAGCUUAACUGCGAGACGGACAGGUCGAGCAGGUACGAAAGU-AGG-UCAUAGUGAUC-CGGUGGUU-CU-G-AAU-GAAGGGCCAUCGCUCAAC-GGAUAAAAGGUA-CUC-CGGG-G-AU-AACAG-GCUGA--UACCGCCCAAG-A-G-UUC-AUA-UCGACGGCG-GU-GU-UUGGCACCU-CGAUGUCGGCUCAUCACAUCCUGGGGCUGAAGU---C-GGUC-CC-AAGGGU-AU-GGCU-GUU-CGC--CAUUUA-AAGUGGU-AC-G-CGA-GCUGGGUUCA-GAACGU-CGUGA-GACAGUU-CGG-U-CCCU-AU-CUGCCGUGGG-CG-UUGGAUGAUU-GA-A-GGGAGU-UGC--------------UCCUAGUACGAGA-GGACC-GGAGUGAA-CGAACCU--CUGGUGU--UCGGGUUGUCAC-GC-CA-GUGGCA-C-UGC-CCGGUA-GCU-AAGU-U-CGGAAUCGAUAACCGCUGAAAGCAUCUAAGC-GUGAAAauca-cuguu-----------------------------------------------------------------------------------------------------------------------------------------------------------------------------------------------------------------------------------------------------------------------------------------------------------------------------------------------------------------------------------------------------------------------------------
>Accession:AF508086::SeqID:7473::TaxID:2
------------------------------------------------------------------------------------------------------------------------------------------------------------------------------------guuguauGGUU-AAGU-G-AC----UAA-GCG-UACA-UG-GUG-GAUG--CCU-UG-GC-AG-UCAG-A-GGC-GAUGAAG-GA--C-GU-ACUAA--CC-U-GC-G-AUAA-GCU-G-UGAG--AAGUC-G-GU-AAGA----GAC-GC-UAUUACUCACAG-AUU-UC-CGAAUGGGGAAA-CCC--A-CU-UAGC-------------------------------------------------------------------------------------------------------------------------------------------------------------------------------------------------------------------------------------------auaa---------GCUA--G-GU--AUCG-U-UGCA--U-----------------------------------------------------------------------------------------------------------------------------------------------------------------------------------------------------------------------------------------------GA-AUA-CA--UA----GUG-CA-A----C-G--A-GG-C-GAACCG-GGA-G-AACUGAAACAUCU-AA-GUA-CCCCGAG-GAAAAGA-AA-UC-A-A--CC------GA-GAUUCC-CU-CAG-UAGC-GGCG-AGCGA-ACG-GGGA-UUA-GCCCU---------------------------------------------------------------------------------------------------------------------------------------------------uaaguu-----------------------------------------------------------------------------------------------------------------------------------------------uc-uug-gaaguu--aG-UG-GAAU-G-G-U-C-CUGGAA-A-G-GCCA-GCGAUAC-AGGG-UGAUAGCCCCGU-A-CAU-gaa-aacgac-cu-uga-------------------------------------------------agugaaauc--------------------------------------------GAGUA-GGG-C-GGGA--CAC-GUG-ACAUCCU-GU-C-U-GAAUAU--GGG-GGGACCAU--CC-UCC-AAGG-CUAA----AUA-CUCC-UGACUGACC-GAUAGUG-AACC-AGUA-CCGUGA-GG-GA-AAGGCGAAAA-GAACCCC-UGUGA--GGGA--GUGAAA-UAGAACCUGAAA-CCGU--GUACGUACAA-G-C-AGUG-GGA-GC-CC----------------------------------------------------------------------------------------------------------------------------------------------------------------------------------------------------------------------------------------------------------------------------------------------------------------------------------------------------------------------------------------------------------------------------------------------------------------------------------------------------------------------------------------------------------------------uucg--------------------------------------------------GG--G-UGAC-UGCGUACCU-U-UUG-UAUAAUGGGUCAGCGACUU-AC-A-UUU-UGU-AGC----GAGGUUAA-CC--------GUAUA---GG-GG-AGCCGUA--GGGAAA-CCGAG-UCU-UAA---CUGGGCGU----------------------------------------------------------------------------------------------------------------------------------------------------------------------------------------------------------------------------------------------------------------------------------------------------------------------------------------------------cuaG-UUGCAAG-GUGUA-GACCCG-AAAC-C-GG-GUGA-UCUAGCCAUGG-GCAGGUUGAA-GGU-UGAGUA-ACAU-CAACU-GGA-GGACCGAACC-CAC-UA-AC--GUUG-CAAAGUUA-GGGG-AUGAC-CUGUGGCUG-G-GGGU--GAAAGGCC-AAUCAAAC-UCGG-AG-AUAGC-UGGUUCU-CCCCG--AAAG-CUAU-UUAG-GUAGCGC-CUCGGA-CGa------A-UA-C--UA-CU-GGGGGUAG-AGC-ACU-GU-UUGGA-C-UA---GG-GGGUC--AUCCCGACUUACCAA-CUCCAU-GCAAACUCCUAA-UA-CCA-G-U-A--AGUAA----U-AUC-C-GGGACACACAC--GGCGUGUGCUAACGUUCCU--CGUG-AAGA-GGG-AAACAA-CCCAGACCGCCGGCUAAG-GU-CCCA-AAGUU-CUGG-U-UAA-GUG--------GGAAACGAUGUG-GGA-AGGCUCA--GACA-G-CUAGG-AUG-UUGGCUUAGAAGCAGCCAU--CAUUUAAAGAAAGC-GUAA-UA--------G-CUCAC-UAGU-------CGA------G-U-CGG-CC--UG-CGCGG--AAGAU-GUAA-C-GGGG--CU--CAAACC-AGG-C--ACC-GAA-G-CUGC-GGau--uc-a------------------------------------------------------------------------------------------------------------------------------------------------------------------------------------------------------------------------------------------------------aucuuaugau-----------------------------------------------------------------------------------------------------------------------------------------------------------------------------------------------------------------------u-ga--gu-GG-UAGG--GGA-G-----CGUU-CU-G-UAA-------------------------------------------------------------------------------------------------------------------------G-U-CUG-C-GAA-GG-UG-U-A-UC--GAGA----G-GU--A-UG-CUGGAG-AU-AU-CA-GAA-GUGC-GAA-UGC-UGA--CGUA-AGUA--ACG--AUAA-A-GGG-GGUGA-AAA-GCCUC-CU---CGCC-GGA-AGA-C-CA-----------------------------------------------------AGG-GUU-CCU-G-UC-CAACG-UUA-AU-C--GG--GGCAGGGU--GAGU-CGAC-C-CCUAAGGUGAG--GC-C-----GAAA---G-G-C-GU-AAUCG--AUGG-GAAG-CAG-G--UU-AAUAUUC-CUGCAC-ga-c--uu-gua-auu-----------------------------------------------------------------------------------------------------------------------------gcgau------g-ggg--gga-cggag--aaggcua--ggug-g---g-cc-ag-g-----cg--a--cgg-u-ug----u-----------------------------------------------------------------------------------------------------------c--c-uggu--gaaa-----------------gugc-g--uaagc--------------------------------------------gguauu-ucua-gg-ca-aa---u--cc--g--gagauacaa----------------------------------------------------------------------------------------------------------------------------------------------cgcu--ga--gacacg-a-ga-c-gaa---------------------------------------------------cgc-ac---uac--g-----gugcg------------------------------------g-aag----ccauu--gaugcc--cug--c-uu-cc-aggaaa-agccuc--uaagcuuca-----------------------------------------------------------------------------------------------------------------ga-u-uac-aa---gu----cAU-CGUA-CCCCAAACCGACACAGGUGG-UCGGGU-A-GAGAA-UACCAA-GGCGCUUGAG-AGAA-CUCGGGUG---------------AAGGAA-CUAGG-CA----------AAAUAGA-ACC-GUAAC--UUCG-GG-AG-AAGGUUC-G-CUCUUga--cag-u-g--------aa-gucc---cuugc---ggau-g---------gagcag-u-cGGGAG-UCGC-AGUGA-CCAGAUG-GC-UGGGACU-GUUUAUCAAAAACACAGCAC-UCUGCAAACACGAA-A------GUG-GA-C-GUAU-AGGGUGUGA-CACCUGCCCGGU-GCCG-GAAGG-UUAAUUGAUGG-GGUUA-GC-------G-CAA----------------GCGA-AGCUCUU-AUCGAAG-CCCCGGU-AAC-GGC-GGCC-GUAACUAUAACGGU-CCUAAGGUAGCG-AAAUU-CCUU-GUC-GGGUAAGUUCCGACCUG-ACGAA-UGGU-GUAACCA-UGGCCAU-GCUG-UCU-CCAC-CCGAGACUCAGUGAA-AUC-GAAUU-CG-CCGUG--AA-GAU-G-CGGUGUACCCGCGGC-UAGACGGAAAGACCCCGUGAACCUU-UACUACAGCUUGGCACUGAACAUUG-AACCUACAU-GUGUAGGAUAGGUGG-GAGGCUUU-GAA-G------GCG-UGACGCCAGUUGCGCU-GGAGCCGUC-C-UUGAAAUACCACCCU----UG-UAUGUUU-GAUG-UUCUAA-CGC-AG-G----GCCC--UGAAUCGGGCUC-GCG-GACAGUGCCUGGUGGG-UAGU-UUGAC-U-GGGGCGGUCUCC-U-CCCAA-AGAGUA-ACGGAGGAGCACGAAA-GUUGGCUAAUCCUGGUCGGAGAUCAUGA-GGU---UAGUGCAGUGGCUUCA-UC-CAGCUUAACUGCGAGACGGACAGGUCGAGCAGGUACGAAAGU-AGG-UCAUAGUGAUC-CGGUGGUU-CU-G-AAUGGAAGGGCCAUCGCUCAAC-GGAUAAAAGGUA-CUC-CGGG-G-AU-AACAG-GCUGA--UACCGCCCAAG-A-G-UUC-AUA-UCGACGGCG-GU-GU-UUGGCACCU-CGAUGUCGGCUCAUCACAUCCUGGGGCUGAAGU---C-GGUC-CC-AAGGGU-AU-GGCU-GUU-CGC--CAUUUA-AAGUGGU-AC-G-CGA-GCUGGGUUCA-GAACGU-CGUGA-GACAGUU-CGG-U-CCCU-AU-CUGCCGUGGG-CG-UUGGAUGAUU-GA-A-GGGAGU-UGC--------------UCCUAGUACGAGA-GGACC-GGAGUGAA-CGAACCU--CUGGUGU--UCGGGUUGUCAC-GC-CA-GUGGCA-C-UGC-CCGGUA-GCU-AAGU-U-CGGAAUCGAUAACCGCUGAAAGCAUCUAAGC-GUGAA----------------------------------------------------------------------------------------------------------------------------------------------------------------------------------------------------------------------------------------------------------------------------------------------------------------------------------------------------------------------------------------------------------------------------------------------
>Accession:AF508087::SeqID:7475::TaxID:2
------------------------------------------------------------------------------------------------------------------------------------------------------------------------------------guuguauGGUU-AAGU-G-AC----UAA-GCG-UACA-UG-GUG-GAUG--CCU-UG-GC-AG-UCAG-A-GGC-GAUGAAG-GA--C-GU-ACUAA--CC-U-GC-G-AUAA-GCU-G-UGAG--AAGUC-G-GU-AAGA----GAC-GC-UAUUACUCACAG-AUU-UC-CGAAUGGGGAAA-CCC--A-CC-CAAG-------------------------------------------------------------------------------------------------------------------------------------------------------------------------------------------------------------------------------------------auaa---------CUUG--G-GU--AUCU-A-UUAC--U-----------------------------------------------------------------------------------------------------------------------------------------------------------------------------------------------------------------------------------------------GA-AUA-CA--UA----GGU-AA-C----A-G--A-GG-C-GAACCG-GGA-G-AACUGAAACAUCU-AA-GUA-CCCCGAG-GAAAAGA-AA-UC-A-A--CC------GA-GAUUCC-CU-CAG-UAGC-GGCG-AGCGA-ACG-GGGA-UUA-GCCCU---------------------------------------------------------------------------------------------------------------------------------------------------ua-----------------------------------------------------------------------------------------------------------------------------------------------agcauc-uug-gaaguu--aG-UG-GAAC-G-G-U-C-CUGGAA-A-G-GCCG-GCGAUAC-AGGG-UGAUAGCCCCGU-A-CAC-gaa-aacaac-cu-ugaugu-----------ga--aa-uc-------------------------------------------------------------------------------GAGUA-GGG-C-GGGA--CAC-GUG-ACAUCCU-GU-C-U-GAAUAU--GGG-GGGACCAU--CC-UCC-AAGG-CUAA----AUA-CUCC-UGACUGACC-GAUAGUG-AACC-AGUA-CCGUGA-GG-GA-AAGGCGAAAA-GAACCCC-UGUGA-GGGGA--GUGAAA-UUGAACCUGAAA-CCGU--GUACGUACAA-G-C-AGUG-GGA-GC-CC----------------------------------------------------------------------------------------------------------------------------------------------------------------------------------------------------------------------------------------------------------------------------------------------------------------------------------------------------------------------------------------------------------------------------------------------------------------------------------------------------------------------------------------------------------------------uucg--------------------------------------------------GG--G-UGAC-UGCGUACCU-U-UUG-UAUAAUGGGUCAGCGACUU-AC-A-UUU-UGU-AGC----GAGGUUAA-CC--------GUAUA---GG-GG-AGCCGUA--GGGAAA-CCGAG-UCU-UAA---CUGGGCGU----------------------------------------------------------------------------------------------------------------------------------------------------------------------------------------------------------------------------------------------------------------------------------------------------------------------------------------------------cuaG-UUGCAAG-GUGUA-GACCCG-AAAC-C-GG-GUGA-UCUAGCCAUGG-GCAGGUUGAA-GGU-UGAGUA-ACAU-CAACU-GGA-GGACCGAACC-CAC-UA-AC--GUUG-CAAAGUUA-GGGG-AUGAC-CUGUGGCUG-G-GGGU--GAAAGGCC-AAUCAAAC-UCGG-AG-AUAGC-UGGUUCU-CCCCG--AAAG-CUAU-UUAG-GUAGCGC-CUCGGA-CGa------A-UA-C--UA-CU-GGGGGUAG-AGC-ACU-GU-UUGGG-C-UA---GG-GGGUC--AUCCCGACUUACCAA-CCCCAU-GCAAACUCCGAA-UA-CCA-G-U-A--AGUAA----U-AUC-C-GGGAGACACAC--GGCGGGUGCUAACGUCCGU--CGUG-AAGA-GGG-AAACAA-CCCAGACCGCCGGCUAAG-GU-CCCA-AAGUU-CUGG-U-UAA-GUG--------GGAAACGAUGUG-GGA-AGGCUCA--GACA-G-CUAGG-AUG-UUGGCUUAGAAGCAGCCAU--CAUUUAAAGAAAGC-GUAA-UA--------G-CUAAC-UAGU-------CGA------G-U-CGG-CC--UG-CGCGG--AAGAU-GUAA-C-GGGG--CU--CAAACC-AGG-C--ACC-GAA-G-CCGC-GGau--uc-a------------------------------------------------------------------------------------------------------------------------------------------------------------------------------------------------------------------------------------------------------uacuuaugua-----------------------------------------------------------------------------------------------------------------------------------------------------------------------------------------------------------------------u-ga--gu-GG-UAGG--GGA-G-----CGUU-CU-G-UAA-------------------------------------------------------------------------------------------------------------------------G-U-CUG-C-GAA-GG-UG-U-A-UC--GAGA----G-GU--A-UG-CUGGAG-AU-AU-CA-GAA-GUGC-GAA-UGC-UGA--CGUA-AGUA--ACG--AUAA-A-GGG-GGUGA-AAA-GCCUC-CU---CGCC-GGA-AGA-C-CA-----------------------------------------------------AGG-GUU-CCU-G-UC-CAACG-UUA-AU-C--GG--GGCAGGGU--GAGU-CGAC-C-CCUAAGGCGAG--GC-C-----GAAA---G-G-C-GU-AGUCG--AUGG-GAAG-CAG-G--UU-AAUAUUC-CUGCAC-ga-c--uu-gua-auu-----------------------------------------------------------------------------------------------------------------------------gcgau------g-ggg--gga-cggag--aaggcua--ggug-g---g-cc-ag-g-----cg--a--cgg-u-ug----u-----------------------------------------------------------------------------------------------------------c--c-uggu--gaaa-----------------gugc-g--uaggu--------------------------------------------gguguu-ucua-gg-ca-aa---u--cc--g--gagacacaa----------------------------------------------------------------------------------------------------------------------------------------------cacu--ga--gacacg-a-ga-c-gaa---------------------------------------------------cac-ac---uac--g-----gugug------------------------------------g-aag----ccauu--gaugcc--cug--c-uu-cc-aggaaa-agccuc--uaagcuuca-----------------------------------------------------------------------------------------------------------------ga-u-uac-aa---gu----cAU-CGUA-CCCCAAACCGACACAGGUGG-UCGGGU-A-GAGAA-UACCAA-GGCGCUUGAG-AGAA-CUCGGGUG---------------AAGGAA-CUAGG-CA----------AAAUAGA-ACC-GUAAC--UUCG-GG-AG-AAGGUUC-G-CUCUUga--cag-u-g--------aa-gucc---cuugc---ggau-g---------gagcag-u-uGGGAG-UCGC-AGUGA-CCAGAUG-GC-UGGGACU-GUUUAUCAAAAACACAGCAC-UCUGCAAACACGAA-A------GUG-GA-C-GUAU-AGGGUGUGA-CACCUGCCCGGU-GCCG-GAAGG-UUAAUUGAUGG-GGUUA-GC-------G-CAA----------------GCGA-AGCUCUU-AUCGAAG-CCCCGGU-AAC-GGC-GGCC-GUAACUAUAACGGU-CCUAAGGUAGCG-AAAUU-CCUU-GUC-GGGUAAGUUCCGACCUGCACGAA-UGGU-GUAACCA-UGGCCAU-GCUG-UCU-CCAC-CCGAGACUCAGUGAA-AUC-GAAUU-CG-CCGUG--AA-GAU-G-CGGUGUACCCGCGGC-UAGACGGAAAGACCCCGUGAACCUU-UACUACAGCUUGGCACUGAACAUUG-AACCUACAU-GUGUAGGAUAGGUGG-GAGGCUUU-GAA-G------GCG-UGACGCCAGUUGCGCU-GGAGCCGUC-C-UUGAAAUACCACCCU----UG-UAUGUUU-GAUG-UUCUAA-CGC-AG-G----GCCC--UGAAUCGGGCUC-GCG-GACAGUGCCUGGUGGG-UAGU-UUGAC-U-GGGGCGGUCUCC-U-CCCAA-AGAGUA-ACGGAGGAGCACGAAG-GUUGGCUAAUCCUGGUCGGACAUCAGGA-GGU---UAGUGCAAUGGCAUAA-GC-CAGCUUAACUGCGAGACGGACAGGUCGAGCAGGUACGAAAGU-AGG-UCAUAGUGAUC-CGGUGGUU-CU-G-AAUGGAAGGGCCAUCGCUCAAC-GGAUAAAAGGUA-CUC-CGGG-G-AU-AACAG-GCUGA--U-uCGCCCAAG-A-G-UUC-AUA-UCGACGGCG-GU-GU-UUGGCACCU-CGAUGUCGGCUCAUCACAUCCUGGGGCUGAAGU---C-GGUC-CC-AAGGGU-AU-GGCU-GUU-CGC--CAUUUA-AAGUGGU-AC-G-CGA-GCUGGGUUCA-GAACGU-CGUGA-GACAGUU-CGG-U-CCCU-AU-CUGCCGUGGG-CG-UUGGAUGAUU-GA-A-GGGAGU-UGC--------------UCCUAGUACGAGA-GGACC-GGAGUGAA-CGAACCU--CUGGUGU--UCGGGUUGUCAC-gc-ca-GUGGCA-C-UGC-CCGGUA-GCU-AAGU-U-CGGAAUCGAUAACCGCUGAAAGCAUCUAGCC-GUGAA----------------------------------------------------------------------------------------------------------------------------------------------------------------------------------------------------------------------------------------------------------------------------------------------------------------------------------------------------------------------------------------------------------------------------------------------
>Accession:AF338177::SeqID:7623::TaxID:2
----------------------------------------------------------------------------------aaucaauauccguuugcacgacaugcguucaucgagggcgcgcuucgcaagaagcaucgugcaggcaacauucugccgaguguguggauauugau-aaugagagcAAUC-AAGU-G-CC--U-UAA-GGG-UGUU-CG-GUG-GAUG--CCU-UG-GC-GC-UGAG-A-GGC-GAUGAAG-GA--C-GU-GCUAC--GC-U-GC-G-AUAA-GCC-G-UGAG--GAGCU-G-CG-AAGG----AGC-UU-UG-AUU-CACGG-AUU-UC-CGAAUGGGGAAA-CCC--A-CC-UU-----------c--gauagccgaaacu-cuaaguucacaacgac-----------------------------------------------gcaa---------------------------------------------------------------------------------------------------------------gucgguguggauuug-g-auuuucgguuaucaagu-g------------AA-GGU-AUGAGA-CUUC--U-----------------------------------------------------------------------------------------------------------------------------------------------------------------------------------------------------------------------------------------------GA-AUA-CA--UA----GGA-GG-U----UUC--A-AG-C-GAACCC-AGG-G-AACUGAAACAUCU-AA-GUA-CCUGGAG-GAAAGGA-CA-UC-A-A--CC------GA-GACUCC-GC-UAG-UAGU-GGCG-AGCGA-ACG-CGGA-CCA-GGCC--------------------------------------------------------------------------------------------------------------------------------------------------------------------------------------------------------------------------------------------------------ag-----------------------------------------ucaucaau--gu-gagaca--aU-UG-GAAu-c-u-guc-a-ggaa-a-g-caga-gccuuag-aGGG-UGAUAGCCCCGU-A-CAA-gua-augcga-ac--auugaug--------------------------------------------------------------------------------------------CUC--GAGUA-AGG-C-GGGA--CAC-GUG-AAAUCCU-GU-C-U-GAACAU--GGG-GGGACCAC--CC-UCC-AAGC-CUAA----GUA-CUCC-UCAGCGACC-GAUAGUG-AACC-AGUA-CCGUGA-GG-GA-AAGGUGAAAA-GCACCCC-GACGA-GGGGA--GUGAAA-UAG-ACCUGAAA-CCGG--ACACCUACAA-A-C-AGAU-GGA-GC-UC---aag--a-------------------------------------------------------------------------------------------------------------------------------------------------------------------------------------------------------------------------------------------------------------------------------------------------------------------------------------------------------------------------------------------------------------------------------------------------------------------------------------------------------------------------------------------------------------uacgu-------------------------u------------------c--u-GA--G-UGAC-AUCGUACCU-U-UUG-UAUUAUGGGCCAGCGACUU-AA-U-UUA-ACG-AGC----AAGCUUAA-ACC-------G-AUA--GGU-GU-AGGCGUA--GCGAAA-GCGAG-UCU-UAA---UAGGGCGC----------------------------------------------------------------------------------------------------------------------------------------------------------------------------------------------------------------------------------------------------------------------------------------------------------------------------------------------------CAAG-UUCGUUG-UAUUA-GACCCG-AAAC-C-UA-GUGA-UCUAGCCAUGA-GCAGGUUGAA-GGU-GAGGUA-ACAC-UCACU-GGA-GGACCGAACG-GGU-GC-CU--GUUG-AAAAAGGC-UCCG-AUGAC-UUGUGGUUA-G-GGGU--GAAAGGCC-AAUCAAAC-UGGG-AA-AUAGC-UGGUUCU-CCGCG--AAAG-AUAU-UUAG-GUAUCGC-CUCGGA-UGA------A-UG-C--CU-CA-GGGGGUAG-AGC-ACU-GG-AUGGG-C-UA---GG-GGGAC--ucaccGUCUUACCAA-ACCCAA-CCAAACUCCGAA-UA-CCU-G-A-G--AGCAA----U-AUC-C-GGGAGUCACAC--GGCGGGUGCUAACGUCCGU--CGUG-GAGA-GGG-AAACAA-CCCGGACCUACAGCUAAG-GC-CCCU-AAUUC-GUGG-C-UAA-GUG--------GGAAAGGAUGUG-GAA-AUCCCAA--AACA-A-CCAGG-AGG-UUGGCUUAGAAGCAGCCAU--CCUUUAAAGAAAGC-GUAA-CA--------G-CUCAC-UGGUcuaaa--UAA------G-G-GUU-UC--UG-CGCCG--AAGAU-GUAA-C-GGGG--CU--CAAGCC-ACG-A--GCC-GAA-G-CUUA-GGau--gc-auac---------gcaa-------------------------------------------------------------------------------------------------------------------------------------------------------------------------------------------------------------------------------------------------------------------------------------------------------------------------------------------------------------------------------------------------------------------------------------------------------------------gua-u-gc--gu-GG-UAGC--GGA-G-----CGUU-CU-G-UAA-------------------------------------------------------------------------------------------------------------------------G-C-CUG-C-GAA-GG-GU-GAC-CC--GUGA----G-GG--C-GC-CUGGAG-GU-AU-CA-GAA-GUGC-GAA-UGC-UGG--CAUG-AGUA--ACG--ACAA-A-CAC-UGUGA-AAG-ACAGU-GU---CGCC-GAA-AGU-C-CA-----------------------------------------------------AGG-GUU-CCU-G-CG-UAAAG-UUA-AU-C--UU--CGCAGGGU--UAGC-CGGU-C-CCUAAGGCGAG--GC-C-----GAAA---G-G-C-GU-AGUCG--AUGG-GAAU-CAC-G--UG-AAUAUUC-GUGAGC-ca-g--ug-gau-----------------------------------------------------------------------------------------------------------------------------------------------gg--uga-cgaau----cccgua-uguu-g---u-uc-ga-c-----cuuau--uggau-ug----------------------------------------------------------------------------------------------------------------g--u-cggg-----------------------------------------------------------------------------------------------------------------------------------------------------------------------------------------------------------------------------------------------------------------------------------------------------------------------------------------------------------------------------------------------------------------------------ccuc--gaaggg-------g-uu-cc-aggaaa-ua-------------------------------------------------------------------------------------------------------------------------------gcc-uccac-au---ua----gaC-CGUA-CCCGAAACCGACACAGGUGG-ACUGGU-A-GAGUA-UACCAA-GGCGCUUGAG-AGAA-CUAUGUUG---------------AAGGAA-CUCGG-CA----------AUUUACC-UCC-GUAAC--UUCG-GA-AU-AAGGAGG-a-ccucu----gcu----------------cgc---gcaa----gcg---------------guc----agggg-UGGC-ACAGA-CCAGGGG-GU-GGCAACU-GUUUAGCAAAAACACAGGGC-UCUGCGAAAUCGCA-A------GAU-GA-C-GUAU-AGGGUCUGA-CGCCUGCCCGGU-GCCG-GAAGG-UUAAAAGGAGA-GGU------------G-CAA----------------------GCCUUGAAUUGAAG-CCCCGGUAAAC-GGC-GGCC-GUAACUAUAACGGU-CCUAAGGUAGCG-AAAUU-CCUU-GUC-GGGUAAGUUCCGACCUGCACGAA-UGGC-GUAAUGA-CUUCCCC-GCUG-UCU-CCAA-CAUAGACUCAGUGAA-AUU-GAAUU-CC-CCGUG--AA-GAU-G-CGGGGUUCCUGCGGU-CAGACGGAAAGACCCCGUGCACCUU-UACUGUAGCUUUGCGCUGGUAUUCG-UGACUGUUU-GUGUAGAAUAGGUGG-UAGACUUU-GAA-G------CUC-GGGCGCCAGCUCGGGU-GGAGUCGCAAU-GUGAAAUACCACCCU----AA-UGGUUAU-GGGU-AUCUAA-CCG-CG-C----UCCG---UUAUCCGGAGC-CGG-GACAGCGCAUGGUGGG-CAGU-UUGAC-U-GGGGCGGUCGCC-U-CCCAA-AGAGUA-ACGGAGGCGUGCGAAG-GUAGGCUCAGAACGGUCGGAAAUCGUUC-GUC---GAGUAUAAUGGCAUAA-GC-CUGCCUGACUGCGAGACCAACAAGUCGAGCAGAGACGAAAGU-CGG-UCAUAGUGAUC-CGGUGGUC-CC-G-CGUGGAUGGGCCAUCGCUCAAC-GGAUAAAAGGUA-CGC-CGGG-G-AU-AACAG-GCUGA--UGACGCCCAAG-A-G-UCC-AUA-UCGACGGCG-UC-GU-UUGGCACCU-CGAUGUCGGCUCAUCACAUCCUGGGGCUGGAGA---A-GGUC-CC-AAGGGU-UC-GGCU-GUU-CGC--CGAUUA-AAGUGGU-AC-G-UGA-GCUGGGUUCA-GAACGU-CGUGA-GACAGUU-CGG-U-CCCU-AU-CUGCCGUGGG-UG-UAGGAAUAUU-GA-G-AGGAUU-UGC--------------CCCUAGUACGAGA-GGACC-GGGGUGAA-CGUACCU--CUGGUGG--AGCUGUUGUCGC-GC-CA-GCGGCA-G-UGC-AGCAUA-GCU-AUGU-A-CGGACGGGAUAACCGCUGAAGGCAUCUAAGC-GGGAAACCCA-CCUCAAA-ACGA-GUAUUCCCU----------------------------------------------------------------------------------------------------------------------------------------U-GAGA-AC-CGUGGAAGACG-ACCACGUU-GAUAGGCC-GG-GUGUG-GAAGCGCA--GCAA---UGCGU-GC-AGCUU-A-CCGGUACUAAUC-GUUCG-AUUG-GCUUGA-UU-G----------------------------------------------------------------------------------------------------------------------------------------------------
>Accession:AY244377::SeqID:8706::TaxID:2
-------------------------------------------------------------------------------------------------------------------------------------------------------------------------------------------------AGU-G-UU--A-UAA-GGG-CAUU-UA-GUG-GAUG--CCU-AG-GC-AU-GCAC-A-GGC-GAUGAAG-GA--C-GU-GAUAC--GC-U-GC-G-AAAA-GCC-G-UGGG--GAGCU-G-CG-AAUA----AGC-UU-UG-AUC-CAUGG-AUC-UC-CGAAUGGGGCAA-CCC--A-CC-UU-----------a-aauaccuagaaa----------------aucugaacuguugacuaguugagau-------------cucucuucuucgaaacucucgagggaaagggaucgaagcccguugggcuuugcaaggccaa-----------g-g-gccgucaccgcuuaugcgguguagguucaacguuuugguggcuggugaaa-cacuucagg---uuu-cua--gguauu--aucau---------------AA-GGU-AUCU-A-CACC--U-----------------------------------------------------------------------------------------------------------------------------------------------------------------------------------------------------------------------------------------------ga-auaaaa--ua----GGGUGU-A----A-G--A-AG-C-GAACGC-AGG-G-AACUGAAACAUCU-AA-GUA-CCUGCAG-GAAAGGA-CA-UC-A-A--CC------GA-GACUCC-GC-AAG-UAGU-GGCG-AGCGA-ACG-CGGA-CCA-GGCC--------------------------------------------------------------------------------------------------------------------------------------------------------------------------------------------------------------------------------------------------------ag-----------------------------------------uggcaaug--ag-uguuaa--aG-UG-GAAG-A-A-C-C-U-GGAA-A-G-GUUU-GCCGUAG-AGGG-UGAUAGCCCCGU-A-CGC-gua-gauaca-cu--uauuguc--------------------------------------------------------------------------------------------cua--GAGUA-GGG-C-GGGA--CAC-GUG-AAAUCCU-GU-C-U-GAACAU--GG--GCGACCAC--GC-UCC-AAGC-CUAA----GUA-CUCG-UGCAUGACC-GAUAGCG-AACC-AGUA-CCGUGA-GG-GA-AAGGUGAAAA-GCACCCC-GACAA-GGGGA--GUGAAA-UAGAACCUGAAA-CUGG--AUGCCUACAA-A-C-AGUC-GGA-GC-CC----------------------------------------------------------------------------------------------------------------------------------------------------------------------------------------------------------------------------------------------------------------------------------------------------------------------------------------------------------------------------------------------------------------------------------------------------------------------------------------------------------------------------------------------------------------------gcaa--------------------------------------------------GG--G-UGAC-GGCGUACCU-U-UUG-UAUAAUGGGUCAACGACUU-AG-U-GUA-ACA-AGC----AAGCUUAA-GCC-------G-GUA--GGU-GU-AGGCGAA--GCGAAA-GCGAG-UCU-GAA---UAGGGCGa--------------------------------------------------------------------------------------------------------------------------------------------------------------------------------------------------------------------------u-------------------------------------------------------------------------------------------------------------------------uuaG-uUUGUUG-CAUUA-GACCCG-AAAC-C-GA-GUGA-UCUAGCCAUGA-GCAGGUUGAA-GGU-UGGGUA-ACAC-CAACU-GGA-GGACCGAACC-CGC-AU-CU--GUUG-CAAUAGAU-UGGG-AUGAC-UUGUGGCUA-G-GGGU--GAAAGGCC-AAUCAAAC-UCGG-AA-AUAGC-UGGUUCU-CCGCG--AAAU-CUAU-UUAG-GUAGAGC-GUCGAG-CGA------A-UA-C--UC-CC-GGGGGUAG-AGC-ACU-GG-AUGGG-C-UA---UG-GGGAC--ucaccGUCUUACUGA-UCCUAA-CCAAACUCCGAA-UA-CCG-G-G-A--AGUAC----U-ACU-C-GGCAGACACAC--GGCGGGUGCUAACGUCCGU--CGUG-AAAA-GGG-CAACAA-CCCUAACCUCCAGCUAAG-GU-CCCC-AAGUC-AUGG-C-UAA-GUG--------GGAAAGGAUGUG-AGG-AUCCCAA--AACA-A-CCAGG-AUG-UUGGCUUAGAAGCAGCCAU--CAUUUAAAGAAAGC-GUAA-CA--------G-CUCAC-UGGUcuagu--CAA------G-G-GUC-UU--UG-CGCCG--AAAAU-GUAA-C-GGGG--CU--AAAGCC-AUG-C--ACC-GAA-G-CUGA-GGau----------------------------------------------------------------------------------------------------------------------------------------------------------------------------------------------------------------------------------------------------------uugcgagcaaucgcaa-------------------------------------------------------------------------------------------------------------------------------------------------------------------------------------------------------------------------gu-GG-UAGC--GGA-G-----CGUU-CC-G-UAA-------------------------------------------------------------------------------------------------------------------------G-C-CUG-U-GAA-GG-GG-UAC-CU--GUGA----G-GG--G-CC-CUGGAG-GU-AU-CG-GAA-GUGC-GAA-UGU-UGA--CAUG-AGUA--ACG--AUAA-A-GAG-GGUGA-GAG-ACCCU-CU---CGCC-GAA-AGA-C-CA-----------------------------------------------------AGG-GUU-CCU-G-CU-UAAAG-UUA-AU-C--UG--AGCAGGGU--UAGC-CGGC-C-CCUAAGACGAG--GC-G-----GACA---C-G-C-GU-AGUCG--AUGG-GAAC-CAC-G--UU-AAUAUUC-GUGGGC-cu-g--gu-ggu-----------------------------------------------------------------------------------------------------------------------------------------------ag--uga-cggau----ugcuua-acuu-g---u-uc-ac-a-----cuuau--uggau-ug----------------------------------------------------------------------------------------------------------------u--g-uggg-----------------------------------------------------------------------------------------------------------------------------------------------------------------------------------------------------------------------------------------------------------------------------------------------------------------------------------------------------------------------------------------------------------------------------cggg--gacgcg-------g-uu-cc-aggaaa-ua-------------------------------------------------------------------------------------------------------------------------------gcu-ccacc-gu--aua----gAC-CGUA-CCCGAAACCGACACAGGUGG-UCAGGU-A-GAGUA-UACCAA-GGCGCUUGAG-AGAA-CUAUGUUG---------------AAGGAA-CUCGG-CA----------AAUUGCA-CGC-GUAAC--UUCG-GA-AG-AAGCGUG-A-CCCUU----auc----------------uac---gcaa----gua---------------ugu----GAGGG-UGGC-ACAGA-CCAGGGG-GU-AGCGACU-GUUUACCAAAAACACAGGGC-UCUGCGAAGUCGCA-A------GAC-GA-C-GUAU-AGGGUCUGA-CGCCUGCCCGGU-GCUG-GAAGG-UUAAGAGGAGG-GGU------------G-CAA----------------------GCUCUGAAUCGAAG-CCCCAGUAAAC-GGC-GGCC-GUAACUAUAACGGU-CCUAAGGUAGCG-AAAUU-CCUU-GUC-GGGUAAGUUCCGACCUGCACGAA-UGGC-GUAACGA-CUUCCCC-GCUG-UCU-CCAA-CAUAGACUCAGUGAA-AUU-GAAUU-CC-CCGUG--AA-GAU-G-CGGGGUUCCUGCGGU-CAGACGGAAAGACCCCGUGCACCUU-UACUAUAGCUUUACACUGGCAUUCG-UGUCGGCAU-GUGUAGGAUAGGUGG-UAGGCUUU-GAA-G------CAG-GGACGCCAGUUCUUGU-GGAGCCAUC-C-UUGAAAUACCACCCU----UA-UCGUCAU-GGAU-GUCUAA-CCG-CG-G----UCCG---UUAUCCGGAUC-CGG-GACAGUGUAUGGUGGG-UAGU-UUGAC-U-GGGGCGGUCGCC-U-CCGAA-AGAGUA-ACGGAGGCGCGCGAUG-GUGGGCUCAGACCGGUCGGAAAUCGGUC-GUC---GAGUGCAAUGGCAUAA-GC-CCGCCUGACUGCGAGACUGACAAGUCGAGCAGAGACGAAAGU-CGG-UCAUAGUGAUC-CGGUGGUC-CC-G-CGUGGAAGGGCCAUCGCUCAAC-GGAUAAAAGGUA-CGC-CGGG-G-AU-AACAG-GCUGA--UGACCCCCAAG-A-G-UCC-AUA-UCGACGGGG-UU-GU-UUGGCACCU-CGAUGUCGGCUCAUCGCAUCCUGGGGCUGGAGC---A-GGU--CC-AAGGGU-UU-GGCU-GUU-CGC--CAAUUA-AAGCGGU-AC-G-UGA-GCUGGGUUCA-GAACGU-CGUGA-GACAGUU-CGG-U-CCCU-AU-CUGCCGUGGG-UG-UAGGAAUAUU-GA-C-AGGAUC-UGU--------------CCCUAGUACGAGA-GGACC-GGGAUGGA-CAUAUCU--CUGGUGG--ACCUGUUGUCCU-GC-CA-AGGGCA-U-AGC-AGGGUA-GCU-ACAU-A-UGGAAUGGAUAACCGCUGAAGGCAUCUAAGC-GGGAAACCAA-CCUGAAA-ACGA-GUGUUCCCU---------------------------------------------------------------------------------------------------------------------------------------AU-CAGA-GC-CGUGGUAGACG-ACCACGUU-GAUAGGCC-GG-GUGUG-GAAGUGCG--GCAA---CGCAU-GA-AGCUU-A-CCGGUACUAAUA-GCUCG-AUUG-GCUUGA-UU-GU---------------------------------------------------------------------------------------------------------------------------------------------------
>Accession:AF208480::SeqID:8720::TaxID:2
-----------------------------------------------------------------------------------------------------------------------------------------------------------------------------------------------------------------------------------------------------------------------------------------------------------------------------------------------------------------------------------------------------------------------aanancgggggaaccaaauanaaaucucgcucguuunauuaauugagaucucugccccucgaaaaucuanagggaaanggaucgaascccguugggcuuugcaaggccaa-----------g-g-gccsucaccgcuuaugcgguguacguucaacruuuhgguggcuggugaaa-camuucagg---uuu-cua--sguauu--aucau---------------AA-GGU-AUCU-A-CACC--U-----------------------------------------------------------------------------------------------------------------------------------------------------------------------------------------------------------------------------------------------GA-AUAAAA--UA----GGGUGU-A----A-A--A-AB-C-GAACGC-AGG-G-AACUGAAACAUCU-AA-GUA-CCUGCAC-GAAAGGA-CA-UC-A-A--CC------GA-AACUCC-GC-AAG-UAGU-GGAG-AGCGA-ACG-CGGA-CCA-GGCC--------------------------------------------------------------------------------------------------------------------------------------------------------------------------------------------------------------------------------------------------------aa-----------------------------------------uggcaaug--ag-uguuua-aaC-UG-GAAG-A-A-C-C-U-GGAA-A-G-GUUU-GCCGUAG-AGGG-UGAUAGCCCCGU-A-CGC-gua-gauaca-cu--uauuguc--------------------------------------------------------------------------------------------cua--GAGUA-GGG-C-GGGA--CAC-GUG-AAAUCCU-GU-U-U-GAACAU--GGG-GCGACCAC--GC-UCC-AAGC-CUAA----GUA-UUCG-UGCAUGACC-GAUAGCG-AACC-AGUA-CCGUGA-GG-GA-AAGGUGAAAA-GCACCCC-GACAA-GGGGA--GUGAAA-UAGAACSUGAAA-CUGG--AUGCCUACAA-A-C-AGUC-GGA-GC-CC----------------------------------------------------------------------------------------------------------------------------------------------------------------------------------------------------------------------------------------------------------------------------------------------------------------------------------------------------------------------------------------------------------------------------------------------------------------------------------------------------------------------------------------------------------------------gcaa--------------------------------------------------GG--G-UGAC-GGCGUACCU-U-UUG-UAUAAUGGGUCAACGACUU-AG-U-GUA-ACA-AGC----AAGCUUAA-GCC-------G-GUA--GGU-GU-AGGCGAA--GCGAAA-GCGAG-UCU-GAA---UAGGGCGa--------------------------------------------------------------------------------------------------------------------------------------------------------------------------------------------------------------------------u-------------------------------------------------------------------------------------------------------------------------uuaG-UUUGUUG-CAUUA-GACCCG-AAAC-C-GA-GUGA-UCUAGCCAUGA-GCAGGUUGAA-GGU-UGGGUA-ACAC-CAACU-GGA-GGACCGAACC-CGC-AU-CU--GUUG-CAAUAGAU-UGGG-AUGAC-UUGUGGCUA-G-GGGU--GAAAGGCC-AAUCAAAC-UCGG-AA-AUAGC-UGGUUCU-CCGCG--AAAU-CUAU-UUAG-GUAGAGC-GUCGAG-CGA------A-UA-C--UC-CC-GGGGGUAG-AGC-ACU-GG-AUGGG-C-UA---UG-GGGAC--ucaccGUCUUACUGA-UCCUAA-CCAAACUCCGAA-UA-CCG-G-G-A--AGUAC----U-ACU-C-GGCAGACACAC--GGCGGGUGCUAACGUCCGU--CGUG-AAAA-GGG-CAACAA-CCCUAACCUCCAGCUAAG-GU-CCCC-AAGUC-AUGG-C-UAA-GUG--------GGAAAGGAUGUG-AGG-AUCCCAA--AACA-A-CCAGG-AUG-UUGGCUUAGAAGCAGCCAU--CAUUUAAAGAAAGC-GUAA-CA--------G-CUCAC-UGGUcuagu--CAA------G-G-GUC-UU--UG-CGCCG--AAAAU-GUAA-C-GGGG--CU--AAAGCC-AUG-C--ACC-GAA-G-CUGA-GGau--uu-gcga---------gcaa-------------------------------------------------------------------------------------------------------------------------------------------------------------------------------------------------------------------------------------------------------------------------------------------------------------------------------------------------------------------------------------------------------------------------------------------------------------------ucg-c-aa--gu-GG-UAGC--GGA-G-----CGUU-CC-G-UAA-------------------------------------------------------------------------------------------------------------------------G-C-CUG-U-GAA-GG-GG-UAC-CU--GUGA----G-GG--G-CC-CUGGAG-GU-AU-CG-GAA-GUGC-GAA-UGU-UGA--CAUG-AGUA--ACG--AUAA-A-GAG-GGUGA-GAG-ACCCU-CU---CGCC-GAA-AGA-C-CA-----------------------------------------------------AGG-GUU-CCU-G-CU-UAAAG-UUA-AU-C--UG--AGCAGGGU--UAGC-CGGC-C-CCUAAGACGAG--GC-G-----GACA---C-G-C-GU-AGUCG--AUGG-GAAC-CAC-G--UU-AAUAUUC-GUGGGC-cu-g--gu-ggu-----------------------------------------------------------------------------------------------------------------------------------------------ag--uga-cggau----ugcuua-acuu-g---u-uc-ac-a-----cuuau--uggau-ug----------------------------------------------------------------------------------------------------------------u--g-uggg-----------------------------------------------------------------------------------------------------------------------------------------------------------------------------------------------------------------------------------------------------------------------------------------------------------------------------------------------------------------------------------------------------------------------------cggg--gacgcg-------g-uu-cc-aggaaa-ua-------------------------------------------------------------------------------------------------------------------------------gcu-ccacc-gu--aua----gAC-CGUA-CCCGAAACCGACACAGGUGG-UCAGGU-A-GAGUA-UACCAA-GGCGCUUGAG-AGAA-UUAUGUUG---------------AAGGAA-CUCGG-CA----------AAUUGCA-CGC-GUAAC--UUCG-GA-AG-AAGCGUG-A-CCCUU----auu----------------uac---gcaa----gua---------------ugu----GAGGG-UGGC-ACAGA-CCAGGGG-GU-AGCGACU-GUUUACCAAAAACACAGGGC-UCUGCGAAGUCGCA-A------GAC-GA-C-GUAU-AGGGUCUGA-CGCCUGCCCGGU-GCUG-GAAGG-UUAAGAGGAGG-GGU------------G-CAA----------------------GCUCUGAAUCGAAG-CCCCAGUAAAC-GGC-GGCC-GUAACUAUAACGGU-CCUAAGGUAGCG-AAAUU-CCUU-GUC-GGGUAAGUUCCGACCUGCACGAA-UGGC-GUAACGA-CUUCCCC-GCUG-UCU-CCAA-CAUAGACUCAGUGAA-AUU-GAAUU-CC-CCGUG--AA-GAU-G-CGGGGUUCCUGCGGU-CAGACGGAAAGACCCCGUGCACCUU-UACUAUAGCUUUACACUGGCAUUCG-UGUCGGCAU-GUGUAGGAUAGGUGG-UAGGCUUU-GAA-G------CAG-GGACGCCAGUUCUUGU-GGAGCCAUC-C-UUGAAAUACCACCCU----UA-UCGUCAU-GGAU-GUCUAA-CCG-CG-G----UCCG---UUAUCCGGAUC-CGG-GACAGUGUAUGGUGGG-UAGU-UUGAC-U-GGGGCGGUCGCC-U-CCGAA-AGAGUA-ACGGAGGCGCGCGAUG-GUGGGCUCAGACCGGUCGGAAAUCGGUC-GUC---GAGUGCAAUGGCAUAA-GC-CCGCCUGACUGCGAGACUGACAAGUCGAGCAGAGACGAAAGU-CGG-UCAUAGUGAUC-CGGUGGUC-CC-G-CGUGGAAGGGCCAUCGCUCAAC-GGAUAAAAGGUA-CGC-CGGG-G-AU-AACAG-GCUGA--UGACCCCCAAG-A-G-UCC-AUA-UCGACGGGG-UU-GU-UUGGCACCU-CGAUGUCGGCUCAUCGCAUCGUGGSGCUGGAGC---A-G-----------------------------------------------------------------------------------------------------------------------------------------------------------------------------------------------------------------------------------------------------------------------------------------------------------------------------------------------------------------------------------------------------------------------------------------------------------------------------------------------------------------------------------------------------------------------------------------------------------------------------------------------------------------------------------------------------------------------------------------------
>Accession:AY244376::SeqID:8721::TaxID:2
-------------------------------------------------------------------------------------------------------------------------------------------------------------------------------------------------AGU-G-AA--U-UAA-GGG-CAUU-UG-GUG-GAUG--CCU-UG-GC-AU-GCAC-A-GGC-GAAGAAG-GA--C-GU-GAUAC--GC-U-GC-G-AAAA-GCC-G-UGGG--GAGCU-G-CG-AAUA----AGC-UU-UG-AUC-CAUGG-AUC-UC-CGAAUGGGGGAA-CCC--A-CC-UU-----------a-aaugcuuggaaaauccaaaccguc---------------------------------------------------------uuu-----------------------------------------------------------------------------------------------------------gacggcuuggg---uuu-cca--agcauu--gugau---------------AA-GGU-AUCU-U-Acuu--u----------------------------------------------------------------------------------------------------------------------------------------------------------------------------------------------------------------------------------------------cGA-AUA-CA--UA----GGG-GU-A----A-G--A-AG-C-GAACGC-AGG-G-AACUGAAACAUCU-AA-GUA-CCUGCAG-GAAAGGA-CA-UC-A-A--CC------GA-GACUCC-GC-AAG-UAGU-GGCG-AGCGA-ACG-CGGA-CCA-GGCC--------------------------------------------------------------------------------------------------------------------------------------------------------------------------------------------------------------------------------------------------------ag-----------------------------------------uggcaaug--au-gaauaa--aG-CG-GAAC-G-A-U-U-U-GGAA-A-A-GUCG-GCCAUAG-AGGG-UGAUAGCCCCUU-A-CGC-gua-gaac-a-gu--cauuguc--------------------------------------------------------------------------------------------cuu--GAGUA-GGG-C-GGGA--CAC-GUG-AAAUCCU-GU-C-U-GAACAU--GGG-GAGACCAC--UC-UCC-AAGC-CUAA----GUA-CUCG-UGCAUGACC-GAUAGCG-AACA-AGUA-CCGUGA-GG-GA-AAGGUGAAAA-GCACCCC-GACGA-GGGGA--GUGAAA-UAGAACCUGAAA-CCGG--AUGCCUACAA-A-C-AGUC-GGA-GC-CC----------------------------------------------------------------------------------------------------------------------------------------------------------------------------------------------------------------------------------------------------------------------------------------------------------------------------------------------------------------------------------------------------------------------------------------------------------------------------------------------------------------------------------------------------------------------gcaa--------------------------------------------------GG--G-UGAC-GGCGUACCU-U-UUG-UAUAAUGGGUCAACGACUU-AG-U-GUA-ACU-AGC----AAGCUUAA-GCC-------G-GUA--GGU-GU-AGGCGCA--GCGAAA-GCGAG-UCU-GAA---UAGGGCG-----------------------------------------------------------------------------------------------------------------------------------------------------------------------------------------------------auugag------------------------------------------------------------------------------------------------------------------------------------------uuag-u--u--G-CAUUA-GACCCG-AAAC-C-GA-GUGA-UCUAGCCAUGA-GCAGGCUGAA-GGU-UGGGUA-ACAC-CAACU-GGA-GGGCCGAACC-CGU-AU-CU--GUUG-CAAUAGAU-UGGG-AUGAC-UUGUGGCUA-G-GGGU--GAAAGGCC-AAUCAAAC-UCGG-AA-AUAGC-UGGUUCU-CCGCG--AAAU-CUAU-UUAG-GUAGAGC-GUCGAC-CGA------A-UA-C--CC-UC-GGGGGUAG-AGC-ACU-GG-AUGGG-C-UA---UG-GGGAC--ucaccGUCUUACUGA-UCCUAA-CCAAACUCCGAA-UA-CCG-A-G-G--AGUAC----U-AGU-C-GGCAGACACAC--GGCGGGUGCUAACGUCCGU--CGUG-AAAA-GGG-CAACAA-CCCUGACCUCCAGCUAAG-GU-CCCC-AAGUC-AUGG-C-UAA-GUG--------GGAAAGGAUGUG-AGG-AUCCCAA--AACA-A-CCAGG-AUG-UUGGCUUAGAAGCAGCCAU--CAUUUAAAGAAAGC-GUAA-CA--------G-CUCAC-UGGUcuaaa--UAA------G-G-GUC-UU--UG-CGCCG--AAAAU-GUAA-C-GGGG--CU--AAAGCC-AUG-C--ACC-GAA-G-CUGA-GGau------------------------------------------------------------------------------------------------------------------------------------------------------------------------------------------------------------------------------------------------------gugacaguuguagugacuguugc----------------------------------------------------------------------------------------------------------------------------------------------------------------------------------------------------------------------gu-GG-UAGC--GGA-G-----CGUU-CC-G-UAA-------------------------------------------------------------------------------------------------------------------------G-U-CUG-U-GAA-GG-CG-GAC-CC--GUGA----G-GG--C-UG-CUGGAG-AU-AU-CG-GAA-GUGC-GAA-UGU-UGA--CAUG-AGUA--ACG--AUAA-A-GGG-AGUGA-GAG-ACUCC-CU---CGCC-GAA-AGA-C-CA-----------------------------------------------------AGG-GUU-CCU-G-CU-UAAAG-UUA-AU-C--UG--AGCAGGGU--UAGC-CGGC-C-CCUAAGACGAG--GC-G-----GACA---C-G-C-GU-AGUCG--AUGG-GAAC-CAC-G--UU-AAUAUUC-GUGGGC-cu-g--gu-ggu-----------------------------------------------------------------------------------------------------------------------------------------------ag--uga-cggau----cucgug-uguu-g---u-ac-au-u-----cuuau--uggau-ug----------------------------------------------------------------------------------------------------------------a--a-ugug-----------------------------------------------------------------------------------------------------------------------------------------------------------------------------------------------------------------------------------------------------------------------------------------------------------------------------------------------------------------------------------------------------------------------------cggc--gaagag-------g-uu-cc-aggaaa-ua-------------------------------------------------------------------------------------------------------------------------------gcu-ccacc-gu--aua----gAC-CGUA-CCCGAAACCGACACAGGUGG-UCAGGU-A-GAGUA-UACCAA-GGCGCUUGAG-AGAA-CUAUGUUG---------------AAGGAA-CUCGG-CA----------AAUUGCA-CGC-GUAAC--UUCG-GA-AG-AAGCGUG-A-CCCCA----uuu----------------uag---gcaa----cua---------------uga----UGGGG-UGGC-ACAGA-CCAGGGG-GU-AGCGACU-GUUUAUCAAAAACACAGGGC-UCUGCGAAGUAGCA-A------UAC-GA-C-GUAU-AGGGUCUGA-CGCCUGCCCGGU-GCUG-GAAGG-UUAAAGGGAGG-GGU------------G-CAA----------------------GCUCUGAACUGAAG-CCCCAGUAAAC-GGC-GGCC-GUAACUAUAACGGU-CCUAAGGUAGCG-AAAUU-CCUU-GUC-GGGUAAGUUCCGACCUGCACGAA-UGGC-GUAACGA-CUUCCCC-GCUG-UCU-CCAA-CAUAGACUCAGUGAA-AUU-GAAUU-CC-CCGUG--AA-GAU-G-CGGGGUUCCUGCGGU-CAGACGGAAAGACCCCGUGCACCUU-UACUAUAGCUUUACACUGGCAUUCG-CCAAGGCAU-GUGUAGGAUAGGUGG-UAGGCUUU-GAA-G------CAG-GGACGCCAGUUUCUGU-GGAGCCAUC-C-UUGAAAUACCACCCU----UA-UCUUCGU-GGAU-GUCUAA-CCG-CG-G----UCCG---UUAUCCGGAUC-CGG-GACAGUGUAUGGUGGG-UAGU-UUGAC-U-GGGGCGGUCGCC-U-CCGAA-AGAGUA-ACGGAGGCGCGCGAUG-GUUAGCUCAGACCGGUCGGAAAUCGGUC-GUC---GAGUGCAAUGGCAUAA-GC-UAGCCUGACUGCGAGACUGACAAGUCGAGCAGAGACGAAAGU-CGG-UCAUAGUGAUC-CGGUGGUC-CC-G-UGUGGAAGGGCCAUCGCUCAAC-GGAUAAAAGGUA-CGC-CGGG-G-AU-AACAG-GCUGA--UGACCCCCAAG-A-G-UCC-AUA-UCGACGGGG-UU-GU-UUGGCACCU-CGAUGUCGACUCAUCGCAUCCUGGGGCUGGAGC---A-GGUC-CC-AAGGGU-AU-GGCU-GUU-CGC--CAUUUA-AAGCGGU-AC-G-UGA-GUUGGGUUCA-GAACGU-CGUGA-GACAGUU-CGG-U-CCCU-AU-CUGCCGUGGG-UG-UAGGAAUAUU-GA-C-AGGAUC-UGU--------------CCCUAGUACGAGA-GGACC-GGGAUGGA-CGUAUCU--CUGGUGG--AUCUGUUGUCCU-GC-CA-AGGGCA-U-AGC-AGAGUA-GCU-AUAU-A-CGGAAUGGAUAACCGCUGAAGGCAUCUAAGC-GGGAAACCAA-CCUGAAA-ACGA-GUGUUCCCU---------------------------------------------------------------------------------------------------------------------------------------AU-CAGA-GC-CGUGGAAGACG-ACCACGUU-GAUAGGAC-GG-GUGUG-GAAGCACA--GCAA---UGUGU-GA-AGCUU-A-CCGUUACUAAUA-GCUCG-AUCG-ACUUCU-UC-GU---------------------------------------------------------------------------------------------------------------------------------------------------
>Accession:AY244373::SeqID:8784::TaxID:2
-------------------------------------------------------------------------------------------------------------------------------------------------------------------------------------------GAAG-AAGU-G-AA--U-UAA-GGG-CAUU-UG-GUG-GAUG--CCU-UG-GC-AU-GCAC-A-GGC-GAAGAAG-GA--C-GU-GAUAC--GC-U-GC-G-AAAA-GCC-G-UGGG--GAGCU-G-CG-AAUA----AGC-UU-UG-AUC-CAUGG-AUC-UC-CGAAUGGGGCAA-CCC--A-CC-UU-------------------------------------------------------------------------------------------------------------------------------------------------------------------------------aaaugcuuggaaaauccaaaccgucuuuga-cggcuuggg---uuu-cca--agcauu--gugau---------------AA-GGU-AUCU-U-ACUU--U----------------------------------------------------------------------------------------------------------------------------------------------------------------------------------------------------------------------------------------------CGA-AUA-CA--UA----GGG-GU-A----A-G--A-AG-C-GAACGC-AGG-G-AACUGAAACAUCU-AA-GUA-CCUGCAG-GAAAGGA-CA-UC-A-A--CC------GA-GACUCC-GC-AAG-UAGU-GGCG-AGCGA-ACG-CGGA-CCA-GGCC--------------------------------------------------------------------------------------------------------------------------------------------------------------------------------------------------------------------------------------------------------ag-----------------------------------------uggcaaug--au-gaauaa--aG-CG-GAAc-g-a-u-u-u-ggaa-a-a-gucg-gccauag-aGGG-UGAUAGCCCCUU-A-CGC-gua-gaac-a-gu--cauuguc--------------------------------------------------------------------------------------------cuu--GAGUA-CGG-C-GGAA--CAC-GUG-AAAUCCU-GU-C-U-GAACAU--GGG-GAGACCAC--UC-UCC-AAGC-CUAA----GUA-CUCG-UGCAUGACC-GAUAGCG-AACA-AGUA-CCGUGA-GG-GA-AAGGUGAAAA-GCACCCC-GACGA-GGGGA--GUGAAA-UAGAACCUGAAA-CCGG--AUGCCUACAA-A-C-AGUC-GGA-GC-CC----------------------------------------------------------------------------------------------------------------------------------------------------------------------------------------------------------------------------------------------------------------------------------------------------------------------------------------------------------------------------------------------------------------------------------------------------------------------------------------------------------------------------------------------------------------------gcaa--------------------------------------------------GG--G-UGAC-GGCGUACCU-U-UUG-UAUAAUGGGUCAACGACUU-AG-U-GUA-ACU-AGC----AAGCUUAA-GCC-------G-GUA--GGU-GU-AGGCGCA--GCGAAA-GCGAG-UCU-GAA---UAGGGCGa--------------------------------------------------------------------------------------------------------------------------------------------------------------------------------------------------------------------------u-------------------------------------------------------------------------------------------------------------------------ugaG-UUAGUUG-CAUUA-GACCCG-AAAC-C-GA-GUGA-UCUAGCCAUGA-GCAGGCUGAA-GGU-UGGGUA-ACAC-CAACU-GGA-GGGCCGAACC-CGU-AU-CU--GUUG-CAAUAGAU-UGGG-AUGAC-UUGUGGCUA-G-GGGU--GAAAGGCC-AAUCAAAC-UCGG-AA-AUAGC-UGGUUCU-CCGCG--AAAU-CUAU-UUAG-GUAGAGC-GUCGAC-CGA------A-UA-C--CC-UC-GGGGGUAG-AGC-ACU-GG-AUGGG-C-UA---UG-GGGAC--ucaccGUCUUACUGA-UCCUAA-CCAAACUCCGAA-UA-CCG-A-G-G--AGUAC----U-AGU-C-GGCAGACACAC--GGCGGGUGCUAACGUCCGU--CGUG-AAAA-GGG-CAACAA-CCCUGACCUCCAGCUAAG-GU-CCCC-AAGUC-AUGG-C-UAA-GUG--------GGAAAGGAUGUG-AGG-AUCCCAA--AACA-A-CCAGG-AUG-UUGGCUUAGAAGCAGCCAU--CAUUUAAAGAAAGC-GUAA-CA--------G-CUCAC-UGGUcuaaa--UAA------G-G-GUC-UU--UG-CGCCG--AAAAU-GUAA-C-GGGG--CU--AAAGCC-AUG-C--ACC-GAA-G-CUGA-GGau--uu-gca----------guaa--------------------------------------------------------------------------------------------------------------------------------------------------------------------------------------------------------------------------------------------------------------------------------------------------------------------------------------------------------------------------------------------------------------------------------------------------------------------ug-c-aa--gu-GG-UAGC--GGA-G-----CGUU-CC-G-UAA-------------------------------------------------------------------------------------------------------------------------G-U-CUG-U-GAA-GG-CG-GAC-CC--GUGA----G-GG--C-UG-CUGGAG-AU-AU-CG-GAA-GUGC-GAA-UGU-UGA--CAUG-AGUA--ACG--AUAA-A-GGG-AGUGA-GAG-ACUCC-CU---CGCC-GAA-AGA-C-CA-----------------------------------------------------AGG-GUU-CCU-G-CU-UAAAG-UUA-AU-C--UG--AGCAGGGU--UAGC-CGGC-C-CCUAAGACGAG--GC-G-----GACA---C-G-C-GU-AGUCG--AUGG-GAAC-CAC-G--UU-AAUAUUC-GUGGGC-cu-g--gu-ggu-----------------------------------------------------------------------------------------------------------------------------------------------ag--uga-cggau----cucgug-uguu-g---u-ac-aa-c-----cuuau--uggau-ug----------------------------------------------------------------------------------------------------------------g--u-ugug-----------------------------------------------------------------------------------------------------------------------------------------------------------------------------------------------------------------------------------------------------------------------------------------------------------------------------------------------------------------------------------------------------------------------------cggc--gaagag-------g-uu-cc-aggaaa-ua-------------------------------------------------------------------------------------------------------------------------------gcu-ccacc-gu--aua----gAC-CGUA-CCCGAAACCGACACAGGUGG-UCAGGU-A-GAGUA-UACCAA-GGCGCUUGAG-AGAA-CUAUGUUG---------------AAGGAA-CUCGG-CA----------AAUUGCA-CGC-GUAAC--UUCG-GA-AG-AAGCGUG-A-CCCCA----uuu----------------uag---gcaa----cua---------------uga----UGGGG-UGGC-ACAGA-CCAGGGG-GU-AGCGACU-GUUUAUCAAAAACACAGGGC-UCUGCGAAGUAGCA-A------UAC-GA-C-GUAU-AGGGUCUGA-CGCCUGCCCGGU-GCUG-GAAGG-UUAAAGGGAGG-GGU------------G-CAA----------------------GCUCUGAACUGAAG-CCCCAGUAAAC-GGC-GGCC-GUAACUAUAACGGU-CCUAAGGUAGCG-AAAUU-CCUU-GUC-GGGUAAGUUCCGACCUGCACGAA-UGGC-GUAACGA-CUUCCCC-GCUG-UCU-CCAA-CAUAGACUCAGUGAA-AUU-GAAUU-CC-CCGUG--AA-GAU-G-CGGGGUUCCUGCGGU-CAGACGGAAAGACCCCGUGCACCUU-UACUAUAGCUUUACACUGGCAUUCG-CCAAGGCAU-GUGUAGGAUAGGUGG-UAGGCUUU-GAA-G------CAG-GGACGCCAGUUUCUGU-GGAGCCAUC-C-UUGAAAUACCACCCU----UA-UCUUCGU-GGAU-GUCUAA-CCG-CG-G----UCCG---UUAUCCGGAUC-CGG-GACAGUGUAUGGUGGG-UAGU-UUGAC-U-GGGGCGGUCGCC-U-CCGAA-AGAGUA-ACGGAGGCGCGCGAUG-GUUAGCUCAGACCGGUCGGAAAUCGGUC-GUC---GAGUGCAAUGGCAUAA-GC-UAGCCUGACUGCGAGACUGACAAGUCGAGCAGAGACGAAAGU-CGG-UCAUAGUGAUC-CGGUGGUC-CC-G-UGUGGAAGGGCCAUCGCUCAAC-GGAUAAAAGGUA-CGC-CGGG-G-AU-AACAG-GCUGA--UGACCCCCAAG-A-G-UCC-AUA-UCGACGGGG-UU-GU-UUGGCACCU-CGAUGUCGACUCAUCGCAUCCUGGGGCUGGAGC---A-GGUC-CC-AAGGGU-AU-GGCU-GUU-CGC--CAUUUA-AAGCGGU-AC-G-UGA-GUUGGGUUCA-GAACGU-CGUGA-GACAGUU-CGG-U-CCCU-AU-CUGCCGUGGG-UG-UAGGAAUAUU-GA-C-AGGAUC-UGU--------------CCCUAGUACGAGA-GGACC-GGGAUGGA-CGUAUCU--CUGGUGG--AUCUGUUGUCCU-GC-CA-AGGGCA-U-AGC-AGAGUA-GCU-AUAU-A-CGGAAUGGAUAACCGCUGAAGGCAUCUAAGC-GGGAAACCAA-CCUGAAA-ACGA-GUGUUCCCU---------------------------------------------------------------------------------------------------------------------------------------AU-CAGA-GC-CGUGGAAGACG-ACCACGUU-GAUAGGAC-GG-GUGUG-GAAGCACA--GCAA---UGUGU-GA-AGCUU-A-CCGUUACUAAUA-GCUCG-AUCG-ACUUCU-UC-G----------------------------------------------------------------------------------------------------------------------------------------------------
>Accession:Null::SeqID:8926::TaxID:2
--------------------------------------------------------------------------------------------------------------------------------------------------------------------------------------------------------------------------------------------------------------------------------------------------------------------------------------------------------------------------------------------------------------------------------------------------------------------------------------------------------------------------------------------------------------------------------------------------------------------------------------------------------------------------------------------------------------------------------------------------------------------------------------------------------------------------------------------------------------------------------------------------------------------------------------------------------------------------------------------------------------------------UC-A-A--CC------GA-GACUCC-NU-AAN-UAGU-GGCG-AGCGA-ACG-CGGA-CCA-GGCCA--------------------------------------------------------------------------------------------------------------------------------------------------------------------------------------------------------------------------------------------------------g-----------------------------------------uggcaaug--au-gaauaa--aG-CG-GAAc-g-a-u-u-u-ggaa-a-a-gucg-gccauag-aGGG-UGAUAGCCCCUU-A-CGC-gua-gaa-ca-gu--cauuguc--------------------------------------------------------------------------------------------cuu--GAGUA-GGG-C-GGGG--CAC-GUG-AAAUCCU-GU-C-U-GAACAU--GGG-GAGACCAC--UC-UCC-AAGC-CUAA----GUA-CUCG-UGCAUGACC-GAUAGCG-AACA-AGUA-CCGUGA-GG-GA-AAGGUGAAAA-GCACCCC-GACGA-GGGGA--GUGAAA-UAGAACCUGAAA-CCGG--AUGCCUACAA-A-C-AGUC-GGA-GC-CC----------------------------------------------------------------------------------------------------------------------------------------------------------------------------------------------------------------------------------------------------------------------------------------------------------------------------------------------------------------------------------------------------------------------------------------------------------------------------------------------------------------------------------------------------------------------gcaa--------------------------------------------------GG--G-UGAC-GGCGUACCU-U-UUG-UAUAAUGGGUCAACGACUU-AG-U-GUA-ACU-AGC----AAGCUUAA-GCC-------G-GUA--GGU-GU-AGGCGCA--GCGAAA-GCGAG-UCU-GAA---UAGGGCGa--------------------------------------------------------------------------------------------------------------------------------------------------------------------------------------------------------------------------u-------------------------------------------------------------------------------------------------------------------------ugaG-UUAGUUG-CAUUA-GACCCG-AAAC-C-GA-GUGA-UCUAGCCAUGA-GCAGGCUGAA-GGU-UGGGUA-ACAC-CAACU-GGA-GGGCCGAACC-CGU-AU-CU--GUUG-CAAUAGAU-UGGG-AUGACGUUGUGGCUA-G-GGGU--GAAAGGCC-AAUCAAAC-UCGG-AA-AUAGC-UGGUUCU-CCGCG--AAAU-CUAU-UUAG-GUAGAGC-GUCGAC-CGA------A-UA-C--CC-UC-GGGGGUAG-AGC-ACU-GG-aUGGG-C-UA---UG-GGGAC--ucaccGUCUUACUGA-UCCUAA-CCAAACUCCGAA-UA-CCG-A-G-G--AGUAC----U-AGU-C-GGCAGnnnCAC--GGCGGGUGCUAACGUCCGU--CGUG-AAAA-GGG-CAACAA-CCCUGACCUCCAGCUAAG-GU-CCCC-AAGUC-AUGG-C-UAA-GUG--------GGAAAGGAUGUG-AGG-AUCCCAA--AACA-U-CCAGG-AUG-UUGGCUUAGAAGCAGCCAU--CAUUUAAAGAAAGC-GUAA-CA--------G-CUCAC-UGGUcuaaa--UAA------G-G-GUC-UU--UG-CGCCG--AAAAU-GUAA-C-GGGG--CU--AAAGC--AUG-C--ACC-GAA-G-CUGA-GGau--gu-gacaguu------guagu---------------------------------------------------------------------------------------------------------------------------------------------------------------------------------------------------------------------------------------------------------------------------------------------------------------------------------------------------------------------------------------------------------------------------------------------------------------gacugu-u-gc--gu-GG-UAGC--GGA-G-----CGUU-CC-G-UAA-------------------------------------------------------------------------------------------------------------------------G-U-CUG-U-GAA-GG-CG-GAC-CC--GUGA----G-GN--C-UG-CUGGAG-AU-AU-CG-GAA-GUGC-GAA-UGU-UGA--CAUG-AGUA--ACG--AUAA-A-GGG-AGUGA-GAG-ACUCC-CU---CGCC-GAA-AGA-C-CA-----------------------------------------------------AGG-GUU-CCU-G-CU-UAAAG-UUA-AU-C--UG--AGCAGGGU--UAGC-CGGc-C-CCUAAGACGAG--GC-G-----GACA---C-G-C-GU-AGUCG--AUGG-GAAC-CAC-G--UU-AAUAUUC-GUGGGC-cu-g--gu-ggu-a----------------------------------------------------------------------------------------------------------------------------------------------g--uga-cggau----cucgug-uguu-g---u-ac-au-u-----cuuac--uggau-ug----------------------------------------------------------------------------------------------------------------a--a-ugug-----------------------------------------------------------------------------------------------------------------------------------------------------------------------------------------------------------------------------------------------------------------------------------------------------------------------------------------------------------------------------------------------------------------------------cggc--gaagag-------g-uu-cc-aggaaa-ua-------------------------------------------------------------------------------------------------------------------------------gcu-ccacc-gu--aua----gaC-CGUA-CCCGAAACCGACACAGGUGG-UCAGGU-A-GAGUA-UACCAA-GGCGcUUGAG-AGAA-CUAUGUUG---------------AAGGAA-CUCGG-NA----------AAUUGCA-CGC-GUAAC--UUCG-GA-AG-AAGCGUG-A-CCCCA----uuu----------------uac---gcaa----gua---------------uga----UGGGG-UGGC-ACAGA-CCAGGGG-GU-AGCGACU-GUUUAUCAAAAACACAGGGC-UCUGCGAAGUAGCA-A------UAC-GA-C-GUAU-AGGGUCUGA-CGCCUGCCCGGU-GCUG-GAAGG-UUAAAGGGAGG-GGU------------G-CAA----------------------GCUCUGAACUGAAG-CCCCAGUAAAC-GGC-GGCC-GUAACUAUAACGGU-CCUAAGGUAGCG-AAAUU-CCUU-GUC-GGGUAAGUUCCGACCUGCACGAA-UGGC-GUAACGA-CUUCCCC-GCUG-UCU-CCAA-CAUAGACUCAGUGAA-AUU-GAAUU-CC-CCNUG--AA-GAU-G-CGGGGUUCCUGCGGU-CAGACGGAAAGACCCCGUGCACCUU-UACUAUAGCUUCACACUGGCAUUCG-CAANGGCAU-GUGUAGGAUAGGUGG-UAGGCUUU-GAA-G------CAG-GGACGCCAGUUCUUGU-GGAGCCAUC-C-UUGAAAUACCACCCU----UA-UCUUcGU-GGAU-GUCUAA-CCG-CG-G----UCCG---UUAUCCGGAUC-CGG-GACAGUGUAUGGUGGG-UAGU-UUGAC-U-GGGGCGGUCNNN-U-CCNAA-AGAGUA-ACGGAGNNNNNNNNNN-NNNNNNNNNNNNNNNNNNNNNNNNNNNN-NNN---NNNNNNNNNNNNNNNN-NN-NNNNNNNNCUGCAGAC-UGACAAUGCAGGCAGNNGCGAAANN-NGG-UCAUAUUGAUN-CGGUGGU--CC---UGUGGAAGGGCCAUCGCUCAAC-GGAUAAAAGGUA-CGC-CGGG-G-AU-AACAG-GCUGA--UGACCCCCAAG-A-G-UCC-AUA-UCGUCGGGGNUU-GU-UUGGCACCU-CGAUGUCGACUCAUCGCAUCCUGGGGCUGGAGC---A-GGUC-CC-AAGGGU-AU-GGCU-GUU-CGC--CAUUUA-AAGCGGU-AC-G-UGA-GUUGGGUUCA-GAACGU-CGUGA-GACAGUU-CGG-U-CCCU-AU-CUGCCGUGGG-UG-UAGGAAUAUU-GA-C-AGGAUC-UGU--------------CCCUAGUACGAGA-GGACC-GGGAUGGA-CGUAUCU--CUGGUGG--AUCUGUUGUCCU-GC-CA-AGGGCA-U-AGC-AGAGUA-GCU-AUAU-A-CGGAAUGGAUAACCGCUGAAGGCAUCUAAGC-GGGAAACCAA-CCUGAAA-ACGA-GUGUUCCCU---------------------------------------------------------------------------------------------------------------------------------------AU-CAGA-GC-CGUGGAAGACG-ACCACGUU-GAUAGGAC-GG-GUGUG-GAAGCAUG--GCAA---CAUGU-GA-AGCUU-A-CCGUUACUAAUA-GCUCG-AUCG-ACUUCU-UC-G----------------------------------------------------------------------------------------------------------------------------------------------------
>Accession:AB102732::SeqID:8927::TaxID:2
----------------------------------------------------------------------------------------------------------------------------------------------------------------------------------------------------------------------------------------------------------------------------------------------------------------------------------------------------------------------------------------------------------------------------------------------------------------------------------------------------------------------------------------------------------------------------------------------------------------------------------------------------------------------------------------------------------------------------------------------------------------------------------------------------------------------------------------------------------------------------------------------------------------------------------------------------------------AG-C-GAACGC-AGG-G-AACUGAAACAUCU-AA-GUA-CCUGCAG-GAAAGGA-CA-UC-A-A--CC------GA-GACUCC-GC-AAG-UAGU-GGCG-AGCGA-ACG-CGGA-CCA-GGCC--------------------------------------------------------------------------------------------------------------------------------------------------------------------------------------------------------------------------------------------------------ag-----------------------------------------uggcaaug--au-gaauaa--aG-CG-GAAc-g-a-u-u-u-ggaa-a-a-gucg-gccauag-aGGG-UGAUAGCCCCUU-A-CGC-gua-gaac-a-gu--cauuguc--------------------------------------------------------------------------------------------cuu--GAGUA-GGG-C-GGGA--CAC-GUG-AAAUCCU-GU-C-U-GAACAU--GGG-GAGACCAC--UC-UCC-AAGC-CUAA----GUA-CUCG-UGCAUGACC-GAUAGCG-AACA-AGUA-CCGUGA-GG-GA-AAGGUGAAAA-GCACCCC-GACGA-GGGGA--GUGAAA-UAGAACCUGAAA-CCGG--AUGCCUACAA-A-C-AGUC-GGA-GC-CC----------------------------------------------------------------------------------------------------------------------------------------------------------------------------------------------------------------------------------------------------------------------------------------------------------------------------------------------------------------------------------------------------------------------------------------------------------------------------------------------------------------------------------------------------------------------gcaa--------------------------------------------------GG--G-UGAC-GGCGUACCU-U-UUG-UAUAAUGGGUCAACGACUU-AG-U-GUA-ACU-AGC----AAGCUUAA-GCC-------G-GUA--GGU-GU-AGGCGCA--GCGAAA-GCGAG-UCU-GAA---UAGGGCGa--------------------------------------------------------------------------------------------------------------------------------------------------------------------------------------------------------------------------u-------------------------------------------------------------------------------------------------------------------------ugaG-UUAGUUG-CAUUA-GACCCG-AAAC-C-GA-GUGA-UCUAGCCAUGA-GCAGGCUGAA-GGU-UGGGUA-ACAC-CAACU-GGA-GGGCCGAACC-CGU-AU-CU--GUUG-CAAUAGAU-UGGG-AUGAC-UUGUGGCUA-G-GGGU--GAAAGGCC-AAUCAAAC-UCGG-AA-AUAGC-UGGUUCU-CCGCG--AAAU-CUAU-UUAG-GUAGAGC-GUCGAC-CGA------A-UA-C--CC-UC-GGGGGUAG-AGC-ACU-GG-AUGGG-C-UA---UG-GGGAC--ucaccGUCUUACUGA-UCCUAA-CCAAACUCCGAA-UA-CCG-A-G-G--AGUAC----U-AGU-C-GGCAGACACAC--GGCGGGUGCUAACGUCCGU--CGUG-AAAA-GGG-CAACAA-CCCUGACCUCCAGCUAAG-GU-CCCC-AAGUC-AUGG-C-UAA-GUG--------GGAAAGGAUGUG-AGG-AUCCCAA--AACA-A-CCAGG-AUG-UUGGCUUAGAAGCAGCCAU--CAUUUAAAGAAAGC-GUAA-CA--------G-CUCAC-UGGUcuaaa--UAA------G-G-GUC--U--UG-CGCCG--AAAAU-GUAA-C-GGGG--CU--AAAGCC-AUG-C--ACC-GAA-G-CUGA-GGau--uu-gca----------guaa--------------------------------------------------------------------------------------------------------------------------------------------------------------------------------------------------------------------------------------------------------------------------------------------------------------------------------------------------------------------------------------------------------------------------------------------------------------------ug-c-aa--gu-GG-UAGC--GGA-G-----CGUU-CC-G-UAA-------------------------------------------------------------------------------------------------------------------------G-U-CUG-U-GAA-GG-CG-GAC-CC--GUGA----G-GG--C-UG-CUGGAG-AU-AU-CG-GAA-GUGC-GAA-UGU-UGA--CAUG-AGUA--ACG--AUAA-A-GGG-AGUGA-GAG-ACUCC-CU---CGCC-GAA-AGA-C-CA-----------------------------------------------------AGG-GUU-CCU-G-CU-UAAAG-UUA-AU-C--UG--AGCAGGGU--UAGC-CGGC-C-CCUAAGACGAG--GC-G-----GACA---C-G-C-GU-AGUCG--AUGG-GAAC-CAC-G--UU-AAUAUUC-GUGGGC-cu-g--gu-ggu-----------------------------------------------------------------------------------------------------------------------------------------------ag--uga-cggau----cucgug-uguu-g---u-ac-aa-c-----cuuau--uggau-ug----------------------------------------------------------------------------------------------------------------g--u-ugug-----------------------------------------------------------------------------------------------------------------------------------------------------------------------------------------------------------------------------------------------------------------------------------------------------------------------------------------------------------------------------------------------------------------------------cggc--gaagag-------g-uu-cc-aggaaa-ua-------------------------------------------------------------------------------------------------------------------------------gcu-ccacc-gu--aua----gAC-CGUA-CCCGAAACCGACACAGGUGG-UCAGGU-A-GAGUA-UACCAA-GGCGCUUGAG-AGAA-CUAUGUUG---------------AAGGAA-CUCGG-CA----------AAUUGCA-CGC-GUAAC--UUCG-GA-AG-AAGCGUG-A-CCCCA----uuu----------------uag---gcaa----cua---------------uga----UGGGG-UGGC-ACAGA-CCAGGGG-GU-AGCGACU-GUUUAUCAAAAACACAGGGC-UCUGCGAAGUAGCA-A------UAC-GA-C-GUAU-AGGGUCUGA-CGCCUGCCCGGU-GCUG-GAAGG-UUAAAGGGAGG-GGU------------G-CAA----------------------GCUCUGAACUGAAG-CCCCAGUAAAC-GGC-GGCC-GUAACUAUAACGGU-CCUAAGGUAGCG-AAAUU-CCUU-GUC-GGGUAAGUUCCGACCUGCACGAA-UGGC-GUAACGA-CUUCCCC-GCUG-UCU-CCAA-CAUAGACUCAGUGAA-AUU-GAAUU-CC-CCGUG--AA-GAU-G-CGGGGUUCCUGCGGU-CAGACGGAAAGACCCCGUGCACCUU-UACUAUAGCUUUACACUGGCAUUCG-CCAAGGCAU-GUGUAGGAUAGGUGG-UAGGCUUU-GAA-G------CAG-GGACGCCAGUUUCUGU-GGAGCCAUC-C-UUGAAAUACCACCCU----UA-UCUUCGU-GGAU-GUCUAA-CCG-CG-G----UCCG---UUAUCCGGAUC-CGG-GACAGUGUAUGGUGGG-UAGU-UUGAC-U-GGGGCGGUCGCC-U-CCGAA-AGAGUA-ACGGAGGCGCGCGAUG-GUUAGCUCAGACCGGUCGGAAAUCGGUC-GUC---GAGUGCAAUGGCAUAA-GC-UAGCCUGACUGCGAGACUGACAAGUCGAGCAGAGACGAAAGU-CGG-UCAUAGUGAUC-CGGUGGUC-CC-G-UGUGGAAGGGCCAUCGCUCAAC-GGAUAAAAGGUA-CGC-CGGG-G-AU-AACAG-GCUGA--UGACCCCCAAG-A-G-UCC-AUA-UCGACGGGG-UU-GU-UUGGCACCU-CGAUGUCGACUCAUCGCAUCCUGGGGCUGGAGC---A-GGUC-CC-AAGGGU-AU-GGCU-GUU-CGC--CAUUUA-AAGCGGU-AC-G-UGA-GUUGGGUUCA-GAACGU-CGUGA-GACAGUU-CGG-U-CCCU-AU-CUGCCGUGGG-UG-UAGGAAUAUU-GA-C-AGGAUC-UGU--------------CCCUAGUACGAGA-GGACC-GGGAUGGA-CGUAUCU--CUGGUGG--AUCUGUUGUCCU-GC-CA-AGGGCA-U-AGC-AGAGUA-GCU-AUAU-A-CGGAAUGGAUAACCGCUGAAGGCAUCUAAGC-GGGAAACCAA-CCUGAAA-ACGA-GUGUUCCCU---------------------------------------------------------------------------------------------------------------------------------------AU-CAGA-GC-CGUGGAAGACG-ACCACGUU-GAUAGGAC-GG-GUGUG-GAAGCACA--GCAA---UGUGU-GA-AGCUU-A-CCGUUACUAAUA-GCUCG-AUCG-ACUUCU-UC-GU---------------------------------------------------------------------------------------------------------------------------------------------------
>Accession:AB102733::SeqID:8928::TaxID:2
----------------------------------------------------------------------------------------------------------------------------------------------------------------------------------------------------------------------------------------------------------------------------------------------------------------------------------------------------------------------------------------------------------------------------------------------------------------------------------------------------------------------------------------------------------------------------------------------------------------------------------------------------------------------------------------------------------------------------------------------------------------------------------------------------------------------------------------------------------------------------------------------------------------------------------------------------------------AG-C-GAACGC-AGG-G-AACUGAAACAUCU-AA-GUA-CCUGCAG-GAAAGGA-CA-UC-A-A--CC------GA-GACUCC-GC-AAG-UAGU-GGCG-AGCGA-ACG-CGGA-CCA-GGCC--------------------------------------------------------------------------------------------------------------------------------------------------------------------------------------------------------------------------------------------------------ag-----------------------------------------uggcaaug--au-gaauaa--aG-CG-GAAc-g-a-u-u-u-ggaa-a-a-gucg-gccauag-aGGG-UGAUAGCCCCUU-A-CGC-gua-gaac-a-gu--cauuguc--------------------------------------------------------------------------------------------cuu--GAGUA-GGG-C-GGGA--CAC-GUG-AAAUCCU-GU-C-U-GAACAU--GGG-GAGACCAC--UC-UCC-AAGC-CUAA----GUA-CUCG-UGCAUGACC-GAUAGCG-AACA-AGUA-CCGUGA-GG-GA-AAGGUGAAAA-GCACCCC-GACGA-GGGGA--GUGAAA-UAGAACCUGAAA-CCGG--AUGCCUACAA-A-C-AGUC-GGA-GC-CC----------------------------------------------------------------------------------------------------------------------------------------------------------------------------------------------------------------------------------------------------------------------------------------------------------------------------------------------------------------------------------------------------------------------------------------------------------------------------------------------------------------------------------------------------------------------gcaa--------------------------------------------------GG--G-UGAC-GGCGUACCU-U-UUG-UAUAAUGGGUCAACGACUU-AG-U-GUA-ACU-AGC----AAGCUUAA-GCC-------G-GUA--GGU-GU-AGGCGCA--GCGAAA-GCGAG-UCU-GAA---UAGGGCGa--------------------------------------------------------------------------------------------------------------------------------------------------------------------------------------------------------------------------u-------------------------------------------------------------------------------------------------------------------------ugaG-UUAGUUG-CAUUA-GACCCG-AAAC-C-GA-GUGA-UCUAGCCAUGA-GCAGGCUGAA-GGU-UGGGUA-ACAC-CAACU-GGA-GGGCCGAACC-CGU-AU-CU--GUUG-CAAUAGAU-UGGG-AUGAC-UUGUGGCUA-G-GGGU--GAAAGGCC-AAUCAAAC-UCGG-AA-AUAGC-UGGUUCU-CCGCG--AAAU-CUAU-UUAG-GUAGAGC-GUCGAC-CGA------A-UA-C--CC-UC-GGGGGUAG-AGC-ACU-GG-AUGGG-C-UA---UG-GGGAC--ucaccGUCUUACUGA-UCCUAA-CCAAACUCCGAA-UA-CCG-A-G-G--AGUAC----U-AGU-C-GGCAGACACAC--GGCGGGUGCUAACGUCCGU--CGUG-AAAA-GGG-CAACAA-CCCUGACCUCCAGCUAAG-GU-CCCC-AAGUC-AUGG-C-UAA-GUG--------GGAAAGGAUGUG-AGG-AUCCCAA--AACA-A-CCAGG-AUG-UUGGCUUAGAAGCAGCCAU--CAUUUAAAGAAAGC-GUAA-CA--------G-CUCAC-UGGUcuaaa--UAA------G-G-GUC-UU--UG-CGCCG--AAAAU-GUAA-C-GGGG--CU--AAAGCC-AUG-C--ACC-GAA-G-CUGA-GGau--uu-gca----------guaa--------------------------------------------------------------------------------------------------------------------------------------------------------------------------------------------------------------------------------------------------------------------------------------------------------------------------------------------------------------------------------------------------------------------------------------------------------------------ug-c-aa--gu-GG-UAGC--GGA-G-----CGUU-CC-G-UAA-------------------------------------------------------------------------------------------------------------------------G-U-CUG-U-GAA-GG-CG-GAC-CC--GUGA----G-GG--C-UG-CUGGAG-AU-AU-CG-GAA-GUGC-GAA-UGU-UGA--CAUG-AGUA--ACG--AUAA-A-GGG-AGUGA-GAG-ACUCC-CU---CGCC-GAA-AGA-C-CA-----------------------------------------------------AGG-GUU-CCU-G-CU-UAAAG-UUA-AU-C--UG--AGCAGGGU--UAGC-CGGC-C-CCUAAGACGAG--GC-G-----GACA---C-G-C-GU-AGUCG--AUGG-GAAC-CAC-G--UU-AAUAUUC-GUGGGC-cu-g--gu-ggu-----------------------------------------------------------------------------------------------------------------------------------------------ag--uga-cggau----cucgug-uguu-g---u-ac-aa-c-----cuuau--uggau-ug----------------------------------------------------------------------------------------------------------------g--u-ugug-----------------------------------------------------------------------------------------------------------------------------------------------------------------------------------------------------------------------------------------------------------------------------------------------------------------------------------------------------------------------------------------------------------------------------cggc--gaagag-------g-uu-cc-aggaaa-ua-------------------------------------------------------------------------------------------------------------------------------gcu-ccacc-gu--aua----gAC-CGUA-CCCGAAACCGACACAGGUGG-UCAGGU-A-GAGUA-UACCAA-GGCGCUUGAG-AGAA-CUAUGUUG---------------AAGGAA-CUCGG-CA----------AAUUGCA-CGC-GUAAC--UUCG-GA-AG-AAGCGUG-A-CCCCA----uuu----------------uag---gcaa----cua---------------uga----UGGGG-UGGC-ACAGA-CCAGGGG-GU-AGCGACU-GUUUAUCAAAAACACAGGGC-UCUGCGAAGUAGCA-A------UAC-GA-C-GUAU-AGGGUCUGA-CGCCUGCCCGGU-GCUG-GAAGG-UUAAAGGGAGG-GGU------------G-CAA----------------------GCUCUGAACUGAAG-CCCCAGUAAAC-GGC-GGCC-GUAACUAUAACGGU-CCUAAGGUAGCG-AAAUU-CCUU-GUC-GGGUAAGUUCCGACCUGCACGAA-UGGC-GUAACGA-CUUCCCC-GCUG-UCU-CCAA-CAUAGACUCAGUGAA-AUU-GAAUU-CC-CCGUG--AA-GAU-G-CGGGGUUCCUGCGGU-CAGACGGAAAGACCCCGUGCACCUU-UACUAUAGCUUUACACUGGCAUUCG-CCAAGGCAU-GUGUAGGAUAGGUGG-UAGGCUUU-GAA-G------CAG-GGACGCCAGUUUCUGU-GGAGCCAUC-C-UUGAAAUACCACCCU----UA-UCUUCGU-GGAU-GUCUAA-CCG-CG-G----UCCG---UUAUCCGGAUC-CGG-GACAGUGUAUGGUGGG-UAGU-UUGAC-U-GGGGCGGUCGCC-U-CCGAA-AGAGUA-ACGGAGGCGCGCGAUG-GUUAGCUCAGACCGGUCGGAAAUCGGUC-GUC---GAGUGCAAUGGCAUAA-GC-UAGCCUGACUGCGAGACUGACAAGUCGAGCAGAGACGAAAGU-CGG-UCAUAGUGAUC-CGGUGGUC-CC-G-UGUGGAAGGGCCAUCGCUCAAC-GGAUAAAAGGUA-CGC-CGGG-G-AU-AACAG-GCUGA--UGACCCCCAAG-A-G-UCC-AUA-UCGACGGGG-UU-GU-UUGGCACCU-CGAUGUCGACUCAUCGCAUCCUGGGGCUGGAGC---A-GGUC-CC-AAGGGU-AU-GGCU-GUU-CGC--CAUUUA-AAGCGGU-AC-G-UGA-GUUGGGUUCA-GAACGU-CGUGA-GACAGUU-CGG-U-CCCU-AU-CUGCCGUGGG-UG-UAGGAAUAUU-GA-C-AGGAUC-UGU--------------CCCUAGUACGAGA-GGACC-GGGAUGGA-CGUAUCU--CUGGUGG--AUCUGUUGUCCU-GC-CA-AGGGCA-U-AGC-AGAGUA-GCU-AUAU-A-CGGAAUGGAUAACCGCUGAAGGCAUCUAAGC-GGGAAACCAA-CCUGAAA-ACGA-GUGUUCCCU---------------------------------------------------------------------------------------------------------------------------------------AU-CAGA-GC-CGUGGAAGACG-ACCACGUU-GAUAGGAC-GG-GUGUG-GAAGCACA--GCAA---UGUGU-GA-AGCUU-A-CCGUUACUAAUA-GCUCG-AUCG-ACUUCU-UC-GU---------------------------------------------------------------------------------------------------------------------------------------------------
>Accession:AB102734::SeqID:8929::TaxID:2
----------------------------------------------------------------------------------------------------------------------------------------------------------------------------------------------------------------------------------------------------------------------------------------------------------------------------------------------------------------------------------------------------------------------------------------------------------------------------------------------------------------------------------------------------------------------------------------------------------------------------------------------------------------------------------------------------------------------------------------------------------------------------------------------------------------------------------------------------------------------------------------------------------------------------------------------------------------AG-C-GAACGC-AGG-G-AACUGAAACAUCU-AA-GUA-CCUGCAG-GAAAGGA-CA-UC-A-A--CC------GA-GACUCC-GC-AAG-UAGU-GGCG-AGCGA-ACG-CGGA-CCA-GGCC--------------------------------------------------------------------------------------------------------------------------------------------------------------------------------------------------------------------------------------------------------ag-----------------------------------------uggcaaug--au-gaauaa--aG-CG-GAAc-g-a-u-u-u-ggaa-a-a-gucg-gccauag-aGGG-UGAUAGCCCCUU-A-CGC-gua-gaac-a-gu--cauuguc--------------------------------------------------------------------------------------------cuu--GAGUA-GGG-C-GGGA--CAC-GUG-AAAUCCU-GU-C-U-GAACAU--GGG-GAGACCAC--UC-UCC-AAGC-CUAA----GUA-CUCG-UGCAUGACC-GAUAGCG-AACA-AGUA-CCGUGA-GG-GA-AAGGUGAAAA-GCACCCC-GACGA-GGGGA--GUGAAA-UAGAACCUGAAA-CCGG--AUGCCUACAA-A-C-AGUC-GGA-GC-CC----------------------------------------------------------------------------------------------------------------------------------------------------------------------------------------------------------------------------------------------------------------------------------------------------------------------------------------------------------------------------------------------------------------------------------------------------------------------------------------------------------------------------------------------------------------------gcaa--------------------------------------------------GG--G-UGAC-GGCGUACCU-U-UUG-UAUAAUGGGUCAACGACUU-AG-U-GUA-ACU-AGC----AAGCUUAA-GCC-------G-GUA--GGU-GU-AGGCGCA--GCGAAA-GCGAG-UCU-GAA---UAGGGCGa--------------------------------------------------------------------------------------------------------------------------------------------------------------------------------------------------------------------------u-------------------------------------------------------------------------------------------------------------------------ugaG-UUAGUUG-CAUUA-GACCCG-AAAC-C-GA-GUGA-UCUAGCCAUGA-GCAGGCUGAA-GGU-UGGGUA-ACAC-CAACU-GGA-GGGCCGAACC-CGU-AU-CU--GUUG-CAAUAGAU-UGGG-AUGAC-UUGUGGCUA-G-GGGU--GAAAGGCC-AAUCAAAC-UCGG-AA-AUAGC-UGGUUCU-CCGCG--AAAU-CUAU-UUAG-GUAGAGC-GUCGAC-CGA------A-UA-C--CC-UC-GGGGGUAG-AGC-ACU-GG-AUGGG-C-UA---UG-GGGAC--ucaccGUCUUACUGA-UCCUAA-CCAAACUCCGAA-UA-CCG-A-G-G--AGUAC----U-AGU-C-GGCAGACACAC--GGCGGGUGCUAACGUCCGU--CGUG-AAAA-GGG-CAACAA-CCCUGACCUCCAGCUAAG-GU-CCCC-AAGUC-AUGG-C-UAA-GUG--------GGAAAGGAUGUG-AGG-AUCCCAA--AACA-A-CCAGG-AUG-UUGGCUUAGAAGCAGCCAU--CAUUUAAAGAAAGC-GUAA-CA--------G-CUCAC-UGGUcuaaa--UAA------G-G-GUC-UU--UG-CGCCG--AAAAU-GUAA-C-GGGG--CU--AAAGCC-AUG-C--ACC-GAA-G-CUGA-GGau--uu-gca----------guaa--------------------------------------------------------------------------------------------------------------------------------------------------------------------------------------------------------------------------------------------------------------------------------------------------------------------------------------------------------------------------------------------------------------------------------------------------------------------ug-c-aa--gu-GG-UAGC--GGA-G-----CGUU-CC-G-UAA-------------------------------------------------------------------------------------------------------------------------G-U-CUG-U-GAA-GG-CG-GAC-CC--GUGA----G-GG--C-UG-CUGGAG-AU-AU-CG-GAA-GUGC-GAA-UGU-UGA--CAUG-AGUA--ACG--AUAA-A-GGG-AGUGA-GAG-ACUCC-CU---CGCC-GAA-AGA-C-CA-----------------------------------------------------AGG-GUU-CCU-G-CU-UAAAG-UUA-AU-C--UG--AGCAGGGU--UAGC-CGGC-C-CCUAAGACGAG--GC-G-----GACA---C-G-C-GU-AGUCG--AUGG-GAAC-CAC-G--UU-AAUAUUC-GUGGGC-cu-g--gu-ggu-----------------------------------------------------------------------------------------------------------------------------------------------ag--uga-cggau----cucgug-uguu-g---u-ac-aa-c-----cuuau--uggau-ug----------------------------------------------------------------------------------------------------------------g--u-ugug-----------------------------------------------------------------------------------------------------------------------------------------------------------------------------------------------------------------------------------------------------------------------------------------------------------------------------------------------------------------------------------------------------------------------------cggc--gaagag-------g-uu-cc-aggaaa-ua-------------------------------------------------------------------------------------------------------------------------------gcu-ccacc-gu--aua----gAC-CGUA-CCCGAAACCGACACAGGUGG-UCAGGU-A-GAGUA-UACCAA-GGCGCUUGAG-AGAA-CUAUGUUG---------------AAGGAA-CUCGG-CA----------AAUUGCA-CGC-GUAAC--UUCG-GA-AG-AAGCGUG-A-CCCCA----uuu----------------uag---gcaa----cua---------------uga----UGGGG-UGGC-ACAGA-CCAGGGG-GU-AGCGACU-GUUUAUCAAAAACACAGGGC-UCUGCGAAGUAGCA-A------UAC-GA-C-GUAU-AGGGUCUGA-CGCCUGCCCGGU-GCUG-GAAGG-UUAAAGGGAGG-GGU------------G-CAA----------------------GCUCUGAACUGAAG-CCCCAGUAAAC-GGC-GGCC-GUAACUAUAACGGU-CCUAAGGUAGCG-AAAUU-CCUU-GUC-GGGUAAGUUCCGACCUGCACGAA-UGGC-GUAACGA-CUUCCCC-GCUG-UCU-CCAA-CAUAGACUCAGUGAA-AUU-GAAUU-CC-CCGUG--AA-GAU-G-CGGGGUUCCUGCGGU-CAGACGGAAAGACCCCGUGCACCUU-UACUAUAGCUUUACACUGGCAUUCG-CCAAGGCAU-GUGUAGGAUAGGUGG-UAGGCUUU-GAA-G------CAG-GGACGCCAGUUUCUGU-GGAGCCAUC-C-UUGAAAUACCACCCU----UA-UCUUCGU-GGAU-GUCUAA-CCG-CG-G----UCCG---UUAUCCGGAUC-CGG-GACAGUGUAUGGUGGG-UAGU-UUGAC-U-GGGGCGGUCGCC-U-CCGAA-AGAGUA-ACGGAGGCGCGCGAUG-GUUAGCUCAGACCGGUCGGAAAUCGGUC-GUC---GAGUGCAAUGGCAUAA-GC-UAGCCUGACUGCGAGACUGACAAGUCGAGCAGAGACGAAAGU-CGG-UCAUAGUGAUC-CGGUGGUC-CC-G-UGUGGAAGGGCCAUCGCUCAAC-GGAUAAAAGGUA-CGC-CGGG-G-AU-AACAG-GCUGA--UGACCCCCAAG-A-G-UCC-AUA-UCGACGGGG-UU-GU-UUGGCACCU-CGAUGUCGACUCAUCGCAUCCUGGGGCUGGAGC---A-GGUC-CC-AAGGGU-AU-GGCU-GUU-CGC--CAUUUA-AAGCGGU-AC-G-UGA-GUUGGGUUCA-GAACGU-CGUGA-GACAGUU-CGG-U-CCCU-AU-CUGCCGUGGG-UG-UAGGAAUAUU-GA-C-AGGAUC-UGU--------------CCCUAGUACGAGA-GGACC-GGGAUGGA-CGUAUCU--CUGGUGG--AUCUGUUGUCCU-GC-CA-AGGGCA-U-AGC-AGAGUA-GCU-AUAU-A-CGGAAUGGAUAACCGCUGAAGGCAUCUAAGC-GGGAAACCAA-CCUGAAA-ACGA-GUGUUCCCU---------------------------------------------------------------------------------------------------------------------------------------AU-CAGA-GC-CGUGGAAGACG-ACCACGUU-GAUAGGAC-GG-GUGUG-GAAGCACA--GCAA---UGUGU-GA-AGCUU-A-CCGUUACUAAUA-GCUCG-AUCG-ACUUCU-UC-GU---------------------------------------------------------------------------------------------------------------------------------------------------
>Accession:AB102735::SeqID:8930::TaxID:2
----------------------------------------------------------------------------------------------------------------------------------------------------------------------------------------------------------------------------------------------------------------------------------------------------------------------------------------------------------------------------------------------------------------------------------------------------------------------------------------------------------------------------------------------------------------------------------------------------------------------------------------------------------------------------------------------------------------------------------------------------------------------------------------------------------------------------------------------------------------------------------------------------------------------------------------------------------------AG-C-GAACGC-AGG-G-AACUGAAACAUCU-AA-GUA-CCUGCAG-GAAAGGA-CA-UC-A-A--CC------GA-GACUCC-GC-AAG-UAGU-GGCG-AGCGA-ACG-CGGA-CCA-GGCC--------------------------------------------------------------------------------------------------------------------------------------------------------------------------------------------------------------------------------------------------------ag-----------------------------------------uggcaaug--au-gaauaa--aG-CG-GAAc-g-a-u-u-u-ggaa-a-a-gucg-gccauag-aGGG-UGAUAGCCCCUU-A-CGC-gua-gaac-a-gu--cauuguc--------------------------------------------------------------------------------------------cuu--GAGUA-GGG-C-GGGA--CAC-GUG-AAAUCCU-GU-C-U-GAACAU--GGG-GAGACCAC--UC-UCC-AAGC-CUAA----GUA-CUCG-UGCAUGACC-GAUAGCG-AACA-AGUA-CCGUGA-GG-GA-AAGGUGAAAA-GCACCCC-GACGA-GGGGA--GUGAAA-UAGAACCUGAAA-CCGG--AUGCCUACAA-A-C-AGUC-GGA-GC-CC----------------------------------------------------------------------------------------------------------------------------------------------------------------------------------------------------------------------------------------------------------------------------------------------------------------------------------------------------------------------------------------------------------------------------------------------------------------------------------------------------------------------------------------------------------------------gcaa--------------------------------------------------GG--G-UGAC-GGCGUACCU-U-UUG-UAUAAUGGGUCAACGACUU-AG-U-GUA-ACU-AGC----AAGCUUAA-GCC-------G-GUA--GGU-GU-AGGCGCA--GCGAAA-GCGAG-UCU-GAA---UAGGGCGa--------------------------------------------------------------------------------------------------------------------------------------------------------------------------------------------------------------------------u-------------------------------------------------------------------------------------------------------------------------ugaG-UUAGUUG-CAUUA-GACCCG-AAAC-C-GA-GUGA-UCUAGCCAUGA-GCAGGCUGAA-GGU-UGGGUA-ACAC-CAACU-GGA-GGGCCGAACC-CGU-AU-CU--GUUG-CAAUAGAU-UGGG-AUGAC-UUGUGGCUA-G-GGGU--GAAAGGCC-AAUCAAAC-UCGG-AA-AUAGC-UGGUUCU-CCGCG--AAAU-CUAU-UUAG-GUAGAGC-GUCGAC-CGA------A-UA-C--CC-UC-GGGGGUAG-AGC-ACU-GG-AUGGG-C-UA---UG-GGGAC--ucaccGUCUUACUGA-UCCUAA-CCAAACUCCGAA-UA-CCG-A-G-G--AGUAC----U-AGU-C-GGCAGACACAC--GGCGGGUGCUAACGUCCGU--CGUG-AAAA-GGG-CAACAA-CCCUGACCUCCAGCUAAG-GU-CCCC-AAGUC-AUGG-C-UAA-GUG--------GGAAAGGAUGUG-AGG-AUCCCAA--AACA-A-CCAGG-AUG-UUGGCUUAGAAGCAGCCAU--CAUUUAAAGAAAGC-GUAA-CA--------G-CUCAC-UGGUcuaaa--UAA------G-G-GUC-UU--UG-CGCCG--AAAAU-GUAA-C-GGGG--CU--AAAGCC-AUG-C--ACC-GAA-G-CUGA-GGau--uu-gca----------guaa--------------------------------------------------------------------------------------------------------------------------------------------------------------------------------------------------------------------------------------------------------------------------------------------------------------------------------------------------------------------------------------------------------------------------------------------------------------------ug-c-aa--gu-GG-UAGC--GGA-G-----CGUU-CC-G-UAA-------------------------------------------------------------------------------------------------------------------------G-U-CUG-U-GAA-GG-CG-GAC-CC--GUGA----G-GG--C-UG-CUGGAG-AU-AU-CG-GAA-GUGC-GAA-UGU-UGA--CAUG-AGUA--ACG--AUAA-A-GGG-AGUGA-GAG-ACUCC-CU---CGCC-GAA-AGA-C-CA-----------------------------------------------------AGG-GUU-CCU-G-CU-UAAAG-UUA-AU-C--UG--AGCAGGGU--UAGC-CGGC-C-CCUAAGACGAG--GC-G-----GACA---C-G-C-GU-AGUCG--AUGG-GAAC-CAC-G--UU-AAUAUUC-GUGGGC-cu-g--gu-ggu-----------------------------------------------------------------------------------------------------------------------------------------------ag--uga-cggau----cucgug-uguu-g---u-ac-aa-c-----cuuau--uggau-ug----------------------------------------------------------------------------------------------------------------g--u-ugug-----------------------------------------------------------------------------------------------------------------------------------------------------------------------------------------------------------------------------------------------------------------------------------------------------------------------------------------------------------------------------------------------------------------------------cggc--gaagag-------g-uu-cc-aggaaa-ua-------------------------------------------------------------------------------------------------------------------------------gcu-ccacc-gu--aua----gAC-CGUA-CCCGAAACCGACACAGGUGG-UCAGGU-A-GAGUA-UACCAA-GGCGCUUGAG-AGAA-CUAUGUUG---------------AAGGAA-CUCGG-CA----------AAUUGCA-CGC-GUAAC--UUCG-GA-AG-AAGCGUG-A-CCCCA----uuu----------------uag---gcaa----cua---------------uga----UGGGG-UGGC-ACAGA-CCAGGGG-GU-AGCGACU-GUUUAUCAAAAACACAGGGC-UCUGCGAAGUAGCA-A------UAC-GA-C-GUAU-AGGGUCUGA-CGCCUGCCCGGU-GCUG-GAAGG-UUAAAGGGAGG-GGU------------G-CAA----------------------GCUCUGAACUGAAG-CCCCAGUAAAC-GGC-GGCC-GUAACUAUAACGGU-CCUAAGGUAGCG-AAAUU-CCUU-GUC-GGGUAAGUUCCGACCUGCACGAA-UGGC-GUAACGA-CUUCCCC-GCUG-UCU-CCAA-CAUAGACUCAGUGAA-AUU-GAAUU-CC-CCGUG--AA-GAU-G-CGGGGUUCCUGCGGU-CAGACGGAAAGACCCCGUGCACCUU-UACUAUAGCUUUACACUGGCAUUCG-CCAAGGCAU-GUGUAGGAUAGGUGG-UAGGCUUU-GAA-G------CAG-GGACGCCAGUUUCUGU-GGAGCCAUC-C-UUGAAAUACCACCCU----UA-UCUUCGU-GGAU-GUCUAA-CCG-CG-G----UCCG---UUAUCCGGAUC-CGG-GACAGUGUAUGGUGGG-UAGU-UUGAC-U-GGGGCGGUCGCC-U-CCGAA-AGAGUA-ACGGAGGCGCGCGAUG-GUUAGCUCAGACCGGUCGGAAAUCGGUC-GUC---GAGUGCAAUGGCAUAA-GC-UAGCCUGACUGCGAGACUGACAAGUCGAGCAGAGACGAAAGU-CGG-UCAUAGUGAUC-CGGUGGUC-CC-G-UGUGGAAGGGCCAUCGCUCAAC-GGAUAAAAGGUA-CGC-CGGG-G-AU-AACAG-GCUGA--UGACCCCCAAG-A-G-UCC-AUA-UCGACGGGG-UU-GU-UUGGCACCU-CGAUGUCGACUCAUCGCAUCCUGGGGCUGGAGC---A-GGUC-CC-AAGGGU-AU-GGCU-GUU-CGC--CAUUUA-AAGCGGU-AC-G-UGA-GUUGGGUUCA-GAACGU-CGUGA-GACAGUU-CGG-U-CCCU-AU-CUGCCGUGGG-UG-UAGGAAUAUU-GA-C-AGGAUC-UGU--------------CCCUAGUACGAGA-GGACC-GGGAUGGA-CGUAUCU--CUGGUGG--AUCUGUUGUCCU-GC-CA-AGGGCA-U-AGC-AGAGUA-GCU-AUAU-A-CGGAAUGGAUAACCGCUGAAGGCAUCUAAGC-GGGAAACCAA-CCUGAAA-ACGA-GUGUUCCCU---------------------------------------------------------------------------------------------------------------------------------------AU-CAGA-GC-CGUGGAAGACG-ACCACGUU-GAUAGGAC-GG-GUGUG-GAAGCACA--GCAA---UGUGU-GA-AGCUU-A-CCGUUACUAAUA-GCUCG-AUCG-ACUUCU-UC-GU---------------------------------------------------------------------------------------------------------------------------------------------------
>Accession:AY244370::SeqID:8953::TaxID:2
--------------------------------------------------------------------------------------------------------------------------------------------------------------------------------------------AUU-AAGU-G-UCU-G-UAA-GGG-CAUU-UG-GUG-GAUG--CCU-UG-GC-AU-GCAC-A-GGC-GAUGAAG-GA--C-GU-GAUAC--GC-U-GC-G-AUAA-GCC-G-UGGG--GAGCU-G-CG-AAUG----AGC-UU-UG-AUC-CAUGG-AUU-UC-CGAAUGGGGAAA-CCC--A-CC-UU-----------a-aaugcuuagaaaauccaaacuguca--------------------------------------------------------guga--------------------------------------------------------------------------------------------------------uga-cggcuuggg---uuu-cua--agcauu--guuaau--------------AA-GGU-AUCU-U-AUCC--U-----------------------------------------------------------------------------------------------------------------------------------------------------------------------------------------------------------------------------------------------GA-AUA-CA--UA----GGG-GU-A----A-G--A-AG-C-GAACUC-GGG-G-AACUGAAACAUCU-AA-GUA-CCCGAAG-GAAAGGA-CA-UC-A-A--CC------GA-GACUCC-GU-AAG-UAGU-GGCG-AGCGA-ACA-CGGA-CCA-GGCC--------------------------------------------------------------------------------------------------------------------------------------------------------------------------------------------------------------------------------------------------------ag-----------------------------------------uggcaaug--ag-gaauaa--aG-CG-GAAC-A-A-G-U-U-GGAA-A-G-CUUG-GCCAUAG-UGGG-UGACAGCCCCGU-A-CGC-gua-gaac-a-cu--cauuguc--------------------------------------------------------------------------------------------cua--GAGUA-GGG-C-GGGA--CAC-GUG-AAAUCCU-GU-U-C-GAACAU--GGG-GAGACCAC--UC-UCC-AAGC-CUAA----GUA-CUCG-UGCAUGACC-GAUAGCG-AACA-AGUA-CCGUGA-GG-GA-AAGGUGAAAA-GCACCCC-GACAA-GGGGA--GUGAAA-UAGAACCUGAAA-CCGG--AUGCCUACAA-A-C-AGUA-GGA-GG-GC----------------------------------------------------------------------------------------------------------------------------------------------------------------------------------------------------------------------------------------------------------------------------------------------------------------------------------------------------------------------------------------------------------------------------------------------------------------------------------------------------------------------------------------------------------------------gaaa--------------------------------------------------GC--C-UGAC-UGCGUACCU-U-UUG-UAUAAUGGGUCAACGACUU-AG-U-GUA-ACU-AGC----AAGCUUAA-GCC-------G-GUA--GGU-GU-AGGCGCA--GCGAAA-GCGAG-UGU-UAA---UAGCGCGa--------------------------------------------------------------------------------------------------------------------------------------------------------------------------------------------------------------------------u-------------------------------------------------------------------------------------------------------------------------ugaG-UUAGUUG-CAUUA-GACCCG-AAAC-C-GA-GUGA-UCUAGCCAUGA-GCAGGUUGAA-GGU-UGGGUA-ACAC-CAACU-GGA-GGACCGAACC-CGC-AU-CU--GUUG-CAAUAGAU-UGGG-AUGAC-UUGUGGUUA-G-GGGU--GAAAGGCC-AAUCAAAC-UCGG-AA-AUAGC-UGGUUCU-CCGCG--AAAA-CUAU-UUAG-GUAGUGC-GUCGAU-CGA------A-UA-C--CU-CA-GGGGGUAG-AGC-ACU-GG-AUGGG-C-UA---UG-GGGAC--ucaccGUCUUACUGA-UCCUAA-CCAAACUCCGAA-UA-CCU-G-A-G--AGUAC----U-AAU-C-GGCAGACACAC--GGCGGGUGCUAACGUCCGU--CGUG-AAGA-GGG-CAACAA-CCCUGACCUCCAGCUAAG-GU-CCCC-AAGUC-AUGG-C-UAA-GUG--------GGAAAGGAUGUG-AGG-AUCCCAA--AACA-A-CCAGG-AUG-UUGGCUUAGAAGCAGCCAU--CAUUUAAAGAAAGC-GUAA-CA--------G-CUCAC-UGGUcuaaa--UAA------G-G-GUC-UU--UG-CGCCG--AAAAU-GUAA-C-GGGG--CU--AAAGCC-AUG-C--ACC-GAA-G-CUGA-GGau--gu-gca----------guaa--------------------------------------------------------------------------------------------------------------------------------------------------------------------------------------------------------------------------------------------------------------------------------------------------------------------------------------------------------------------------------------------------------------------------------------------------------------------ug-c-ac--gu-GG-UAGC--GGA-G-----CGUU-CC-G-UAA-------------------------------------------------------------------------------------------------------------------------G-C-CUG-U-GAA-GG-GA-CAG-UC--GUGA----G-AC--A-UC-CUGGAG-GU-AU-CG-GAA-GUGC-GAA-UGU-UGA--CAUG-AGUA--ACG--AUAA-A-GGG-GGUGA-GAG-ACCCC-CU---CGCC-GAA-AGA-C-CA-----------------------------------------------------AGG-GUU-CCU-G-CU-UAAAG-UUA-AU-C--UG--AGCAGGGU--UAGC-CGGC-C-CCUAAGGCGAG--GC-A-----GAAA---U-G-C-GU-AGUCG--AUGG-GAAC-CAC-G--UU-AAUAUUC-GUGGGC-cu-g--gu-ggu-----------------------------------------------------------------------------------------------------------------------------------------------ag--uga-cggau----cacaca-aauu-g---u-ac-ag-u-----cuuac--uggau-ug----------------------------------------------------------------------------------------------------------------a--u-ugug-----------------------------------------------------------------------------------------------------------------------------------------------------------------------------------------------------------------------------------------------------------------------------------------------------------------------------------------------------------------------------------------------------------------------------cagu--ggagug-------g-uu-cc-aggaaa-ua-------------------------------------------------------------------------------------------------------------------------------gcu-ccacc-gu--aua----gAC-CGUA-CCCGAAACCGACACAGGUGG-UCAGGU-A-GAGUA-UACCAA-GGCGCUUGAG-AGAA-CUAUGUUG---------------AAGGAA-CUCGG-CA----------AAUUGCA-CGC-GUAAC--UUCG-GA-AG-AAGCGUG-A-CCCCU----uuu----------------uac---gcaa----gug---------------gag----AGGGG-UGGC-ACAGA-CCAGGGG-GU-AGCGACU-GUUUAUCAAAAACACAGGGC-UCUGCGAAGUCGCA-A------GAC-GA-C-GUAU-AGGGUCUGA-CGCCUGCCCGGU-GCUG-GAAGG-UUAAGAGGAGA-GGU------------G-CAA----------------------GCUUUGAAUCGAAG-CCCCAGUAAAC-GGC-GGCC-GUAACUAUAACGGU-CCUAAGGUAGCG-AAAUU-CCUU-GUC-GGGUAAGUUCCGACCUGCACGAA-UGGC-GUAACGA-CUUCCCC-GCUG-UCU-CCAA-CAUAGACUCAGUGAA-AUU-GAAUU-CC-CCGUG--AA-GAU-G-CGGGGUUCCUGCGGU-CAGACGGAAAGACCCCGUGCACCUU-UACUAUAGCUUUACACUGGCAUUCG-UGUCGGCAU-GUGUAGGAUAGGUGG-UAGGCUUU-GAA-G------CUU-GGACGCCAGUUCGAGU-GGAGCCAUC-C-UUGAAAUACCACCCU----UA-UCGUCAU-GGAU-GUCUAA-CCG-CG-G----UCCG---UUAUCCGGAUC-CGG-GACAGUGUAUGGUGGG-UAGU-UUGAC-U-GGGGCGGUCGCC-U-CCGAA-AGAGUA-ACGGAGGCGCGCGAUG-GUGGGCUCAGACCGGUCGGAAAUCGGUC-GUC---GAGUGCAAUGGCAUAA-GC-CCGCCUGACUGCGAGACUGACAAGUCGAGCAGAGACGAAAGU-CGG-UCAUAGUGAUC-CGGUGGUC-CC-G-CGUGGAAGGGCCAUCGCUCAAC-GGAUAAAAGGUA-CGC-CGGG-G-AU-AACAG-GCUGA--UGACCCCCAAG-A-G-UCC-AUA-UCGACGGGG-UU-GU-UUGGCACCU-CGAUGUCGGCUCAUCGCAUCCUGGGGCUGGAGC---A-GGUC-CC-AAGGGU-UU-GGCU-GUU-CGC--CAAUUA-AAGCGGU-AC-G-UGA-GCUGGGUUCA-GAACGU-CGUGA-GACAGUU-CGG-U-CCCU-AU-CUGCCGUGGG-UG-UAGGAAUAUU-GA-C-AGGAUC-UGU--------------CCCUAGUACGAGA-GGACC-GGGAUGGA-CAUAUCU--CUGGUGG--ACCUGUUGUCGU-GC-CA-ACGGCA-U-AGC-AGGGUA-GCU-AUAU-A-UGGAAUGGAUAACCGCUGAAGGCAUCUAAGC-GGGAAACCAA-CCUGAAA-ACGA-GUAUUCCCU---------------------------------------------------------------------------------------------------------------------------------------AU-CAGA-GC-CGUGGAAGACG-ACCACGUU-GAUAGGAC-GG-GUGUG-GAAGCAGG--GUAA---CCUGC-GA-AGCUU-A-CCGUUACUAAUA-GCUCG-AUUG-GCUUAA-UC-GU---------------------------------------------------------------------------------------------------------------------------------------------------
>Accession:AY244374::SeqID:8954::TaxID:2
-------------------------------------------------------------------------------------------------------------------------------------------------------------------------------------------------AGU-G-AA--U-UAA-GGG-CAUU-UG-GUG-GAUG--CCU-UG-GC-AU-GCGC-A-GGC-GAAGAAG-GA--C-GU-GAUAC--GC-U-GC-G-AAAA-GCC-G-UGGG--GAGCU-G-CG-AAUA----AGC-UU-UG-AUC-CAUGG-AUC-UC-CGAAUGGGGCAA-CCC--A-CC-UU-----------a-aaugcuuggaaaauccaaaccguc---------------------------------------------------------uuu----------------------------------------------------------------------------------------------------------ga-cggcuuggg---uuu-cca--agcauu--gugau---------------AA-GGU-AUCU-U-ACUU--U----------------------------------------------------------------------------------------------------------------------------------------------------------------------------------------------------------------------------------------------CGA-AUA-CA--UA----GGG-GU-A----A-G--A-AG-C-GAACGC-AGG-G-AACUGAAACAUCU-AA-GUA-CCUGCAG-GAAAGGA-CA-UC-A-A--CC------GA-GACUCC-GC-AAG-UAGU-GGCG-AGCGA-ACG-CGGA-CCA-GGCC--------------------------------------------------------------------------------------------------------------------------------------------------------------------------------------------------------------------------------------------------------ag-----------------------------------------uggcaaug--au-gaauaa--aG-CG-GAAC-G-A-U-U-U-GGAA-A-A-GUCG-GCCAUAG-AGGG-UGAUAGCCCCUU-A-CGC-gua-gaac-a-gu--cauuguc--------------------------------------------------------------------------------------------cuu--GAGUACGGG-C-GGGA-ACAC-GUG-AAAUCCU-GU-CGU-GAACAU--GGG-GAGACCAC--UC-UCC-AAGC-CUAA----GUA-CUCG-UGCAUGACC-GAUAGCG-AACA-AGUA-CCGUGA-GG-GA-AAGGUGAAAA-GCACCCC-GACGA-GGGGA--GUGAAA-UAGAACCUGAAA-CCGG--AUGCCUACAA-A-C-AGUC-GGA-GC-CC----------------------------------------------------------------------------------------------------------------------------------------------------------------------------------------------------------------------------------------------------------------------------------------------------------------------------------------------------------------------------------------------------------------------------------------------------------------------------------------------------------------------------------------------------------------------gcaa--------------------------------------------------GG--G-UGAC-GGCGUACCU-U-UUG-UAUAAUGGGUCAACGACUU-AG-U-GUA-ACU-AGC----AAGCUUAA-GCC-------G-GUA--GGU-GU-AGGCGCA--GCGAAA-GCGAG-UCU-GAA---UAGGGCGa--------------------------------------------------------------------------------------------------------------------------------------------------------------------------------------------------------------------------u-------------------------------------------------------------------------------------------------------------------------ugaG-UUAGUUG-CAUUA-GACCCG-AAAC-C-GA-GUGA-UCUAGCCAUGA-GCAGGCUGAA-GGU-UGGGUA-ACAC-CAACU-GGA-GGGCCGAACC-CGU-AU-CU--GUUG-CAAUAGAU-UGGG-AUGAC-UUGUGGCUA-G-GGGU--GAAAGGCC-AAUCAAAC-UCGG-AA-AUAGC-UGGUUCU-CCGCG--AAAU-CUAU-UUAG-GUAGAGC-GUCGAC-CGA------A-UA-C--CC-UC-GGGGGUAG-AGC-ACU-GG-AUGGG-C-UA---UG-GGGAC--ucaccGUCUUACUGA-UCCUAA-CCAAACUCCGAA-UA-CCG-A-G-G--AGUAC----U-AGU-C-GGCAGACACAC--GGCGGGUGCUAACGUCCGU--CGUG-AAAA-GGG-CAACAA-CCCUGACCUCCAGCUAAG-GU-CCCC-AAGUC-AUGG-C-UAA-GUG--------GGAAAGGAUGUG-AGG-AUCCCAA--AACA-A-CCAGG-AUG-UUGGCUUAGAAGCAGCCAU--CAUUUAAAGAAAGC-GUAA-CA--------G-CUCAC-UGGUcuaaa--UAA------G-G-GUC-UU--UG-CGCCG--AAAAU-GUAA-C-GGGG--CU--AAAGCC-AUG-C--ACC-GAA-G-CUGA-GGau--gu-gacaguu------guagu---------------------------------------------------------------------------------------------------------------------------------------------------------------------------------------------------------------------------------------------------------------------------------------------------------------------------------------------------------------------------------------------------------------------------------------------------------------gacugu-u-gc--gu-GG-UAGC--GGA-G-----CGUU-CC-G-UAA-------------------------------------------------------------------------------------------------------------------------G-U-CUG-U-GAA-GG-CG-GAC-CC--GUGA----G-GG--C-UG-CUGGAG-AU-AU-CG-GAA-GUGC-GAA-UGU-UGA--CAUG-AGUA--ACG--AUAA-A-GGG-AGUGA-GAG-ACUCC-CU---CGCC-GAA-AGA-C-CA-----------------------------------------------------AGG-GUU-CCU-G-CU-UAAAG-UUA-AU-C--UG--AGCAGGGU--UAGC-CGGC-C-CCUAAGACGAG--GC-G-----GACA---C-G-C-GU-AGUCG--AUGG-GAAC-CAC-G--UU-AAUAUUC-GUGGGC-cu-g--gu-ggu-----------------------------------------------------------------------------------------------------------------------------------------------ag--uga-cggau----cucgug-uguu-g---u-ac-au-u-----cuuau--uggau-ug----------------------------------------------------------------------------------------------------------------a--a-ugug-----------------------------------------------------------------------------------------------------------------------------------------------------------------------------------------------------------------------------------------------------------------------------------------------------------------------------------------------------------------------------------------------------------------------------cggc--gaagag-------g-uu-cc-aggaaa-ua-------------------------------------------------------------------------------------------------------------------------------gcu-ccacc-gu--aua----gAC-CGUA-CCCGAAACCGACACAGGUGG-UCAGGU-A-GAGUA-UACCAA-GGCGCUUGAG-AGAA-CUAUGUUG---------------AAGGAA-CUCGG-CA----------AAUUGCA-CGC-GUAAC--UUCG-GA-AG-AAGCGUG-A-CCCCA----uuu----------------uag---gcaa----cua---------------uga----UGGGG-UGGC-ACAGA-CCAGGGG-GU-AGCGACU-GUUUAUCAAAAACACAGGGC-UCUGCGAAGUAGCA-A------UAC-GA-C-GUAU-AGGGUCUGA-CGCCUGCCCGGU-GCUG-GAAGG-UUAAAGGGAGG-GGU------------G-CAA----------------------GCUCUGAACUGAAG-CCCCAGUAAAC-GGC-GGCC-GUAACUAUAACGGU-CCUAAGGUAGCG-AAAUU-CCUU-GUC-GGGUAAGUUCCGACCUGCACGAA-UGGC-GUAACGA-CUU-CCC-GCUG-UCU-CCAA-CAUAGACUCAGUGAA-AUU-GAAUU-CC-CCGUG--AA-GAU-G-CGGGGUUCCUGCGGU-CAGACGGAAAGACCCCGUGCACCUU-UACUAUAGCUUUACACUGGCAUUCG-CCAAGGCAU-GUGUAGGAUAGGUGG-UAGGCUUU-GAA-G------CAG-GGACGCCAGUUUCUGU-GGAGCCAUC-C-UUGAAAUACCACCCU----UA-UCUUCGU-GGAU-GUCUAA-CCG-CG-G----UCCG---UUAUCCGGAUC-CGG-GACAGUGUAUGGUGGG-UAGU-UUGAC-U-GGGGCGGUCGCC-U-CCGAA-AGAGUA-ACGGAGGCGCGCGAUG-GUUAGCUCAGACCGGUCGGAAAUCGGUC-GUC---GAGUGCAAUGGCAUAA-GC-UAGCCUGACUGCGAGACUGACAAGUCGAGCAGAGACGAAAGU-CGG-UCAUAGUGAUC-CGGUGGUC-CC-G-UGUGGAAGGGCCAUCGCUCAAC-GGAUAAAAGGUA-CGC-CGGG-G-AU-AACAG-GCUGA--UGACCCCCAAG-A-G-UCC-AUA-UCGACGGGG-UU-GU-UUGGCACCU-CGAUGUCGACUCAUCGCAUCCUGGGGCUGGAGC---A-GGUC-CC-AAGGGU-AU-GGCU-GUU-CGC--CAUUUA-AAGCGGU-AC-G-UGA-GUUGGGUUCA-GAACGU-CGUGA-GACAGUU-CGG-U-CCCU-AU-CUGCCGUGGG-UG-UAGGAAUAUU-GA-C-AGGAUC-UGU--------------CCCUAGUACGAGA-GGACC-GGGAUGGA-CGUAUCU--CUGGUGG--AUCUGUUGUCCU-GC-CA-AGGGCA-U-AGC-AGAGUA-GCU-AUAU-A-CGGAAUGGAUAACCGCUGAAGGCAUCUAAGC-GGGAAACCAA-CCUGAAA-ACGA-GUGUUCCCU---------------------------------------------------------------------------------------------------------------------------------------AU-CAGA-GC-CGUGGAAGACG-ACCACGUU-GAUAGGAC-GG-GUGUG-GAAGCACA--GCAA---UGUGU-GA-AGCUU-A-CCGUUACUAAUA-GCUCG-AUCG-ACUUCU-CU-CG---------------------------------------------------------------------------------------------------------------------------------------------------
>Accession:U28505::SeqID:8974::TaxID:2
--------------------------------------------------------------------------------------------------------------------------------------------------------------------------------------------AUU-AAGU-G-GA--A-UAA-GGG-CAUU-UG-GUG-GAUG--CCU-UG-GC-AU-GCAC-A-GGC-GAUGAAG-GA--C-GU-GAUAC--GC-U-GC-G-AUAA-GCC-G-UGGG--GAGCU-G-CG-AAUA----AGC-UU-UG-AUC-CAUGG-AUU-UC-CGAAUGGGGAAA-CCC--A-CC-UU-----------a-gauaucuagaaaaucuguuuugcuagaccaaucuguuuugaccgguugugugg-------------gacgucccauacagaccgguaggccgucgccaagcguuuggcgcaccgucuguagcgcagg------cucgaagagccgacagcgugaagacaaaacaaaccccgaguguggggcgauaggguucggcaaaagagg---uuu-cua--gauauc--gcaaau--------------AA-GGU-AUCU-U-ACCU--U-----------------------------------------------------------------------------------------------------------------------------------------------------------------------------------------------------------------------------------------------GA-AUA-CA--UA----GGG-GU-A----A-G--A-AG-C-GAACUC-GGG-G-AACUGAAACAUCU-AA-GUA-CCCGAAG-GAAAGGA-CA-UC-A-A--CC------GA-GACUCC-GC-AAG-UAGU-GGCG-AGCGA-ACG-CGGA-CCA-GGCC--------------------------------------------------------------------------------------------------------------------------------------------------------------------------------------------------------------------------------------------------------ag-----------------------------------------uggcaaug--ag-gaauaa--aG-CG-GAAC-A-A-G-U-U-GGAA-A-G-CUUG-GCCAUAG-UGGG-UGACAGCCCCGU-A-CGC-gua-gaac-a-cu--cauuguc--------------------------------------------------------------------------------------------cua--GAGUA-GGG-C-GGGA--CAC-GUG-AAAUCCU-GU-U-C-GAACAU--GGG-GAGACCAC--UC-UCC-AAGC-CUAA----GUA-CUCG-UGCAUGACC-GAUAGCG-AACA-AGUA-CCGUGA-GG-GA-AAGGUGAAAA-GCACCCC-GACAA-GGGGA--GUGAAA-UAGAACCUGAAA-CCGG--AUGCCUACAA-A-C-AGUA-GGA-GG-GC----------------------------------------------------------------------------------------------------------------------------------------------------------------------------------------------------------------------------------------------------------------------------------------------------------------------------------------------------------------------------------------------------------------------------------------------------------------------------------------------------------------------------------------------------------------------gaaa--------------------------------------------------GC--C-UGAC-UGCGUACCU-U-UUG-UAUAAUGGGUCAACGACUU-AG-U-GUA-ACU-AGC----AAGCUUAA-GCC-------G-GUA--GGU-GU-AGGCGCA--GCGAAA-GCGAG-UGU-UAA---UAGCGCGa--------------------------------------------------------------------------------------------------------------------------------------------------------------------------------------------------------------------------u-------------------------------------------------------------------------------------------------------------------------ugaG-UUAGUUG-CAUUA-GACCCG-AAAC-C-GA-GUGA-UCUAGCCAUGA-GCAGGUUGAA-GGU-UGGGUA-ACAC-CAACU-GGA-GGACCGAACC-CGC-AU-CU--GUUG-CAAUAGAU-UGGG-AUGAC-UUGUGGUUA-G-GGGU--GAAAGGCC-AAUCAAAC-UCGG-AA-AUAGC-UGGUUCU-CCGCG--AAAA-CUAU-UUAG-GUAGUGC-GUCGAU-CGA------A-UA-C--CU-CA-GGGGGUAG-AGC-ACU-GG-AUGGG-C-UA---UG-GGGAC--ucaccGUCUUACUGA-UCCUAA-CCAAACUCCGAA-UA-CCU-G-A-G--AGUAC----U-AAU-C-GGCAGACACAC--GGCGGGUGCUAACGUCCGU--CGUG-AAGA-GGG-CAACAA-CCCUGACCUCCAGCUAAG-GU-CCCC-AAGUC-AUGG-C-UAA-GUG--------GGAAAGGAUGUG-AGG-AUCCCAA--AACA-A-CCAGG-AUG-UUGGCUUAGAAGCAGCCAU--CAUUUAAAGAAAGC-GUAA-CA--------G-CUCAC-UGGUcuaaa--UAA------G-G-GUC-UU--UG-CGCCG--AAAAU-GUAA-C-GGGG--CU--AAAGCC-AUG-C--ACC-GAA-G-CUGA-GGau--gu-gcac---------guaa-------------------------------------------------------------------------------------------------------------------------------------------------------------------------------------------------------------------------------------------------------------------------------------------------------------------------------------------------------------------------------------------------------------------------------------------------------------------gug-u-ac--gu-GG-UAGC--GGA-G-----CGUU-CC-G-UAA-------------------------------------------------------------------------------------------------------------------------G-C-CUG-U-GAA-GG-GA-CAG-UC--GUGA----G-AC--A-UC-CUGGAG-GU-AU-CG-GAA-GUGC-GAA-UGU-UGA--CAUG-AGUA--ACG--AUAA-A-GGG-GGUGA-GAG-ACCCC-CU---CGCC-GAA-AGA-C-CA-----------------------------------------------------AGG-GUU-CCU-G-CU-UAAAG-UUA-AU-C--UG--AGCAGGGU--UAGC-CGGc-C-CCUAAGGCGAG--GC-A-----GAAA---U-G-C-GU-AGUCG--AUGG-GAAC-CAC-G--UU-AAUAUUC-GUGGGC-cu-g--gu-ggu-----------------------------------------------------------------------------------------------------------------------------------------------ag--uga-cggau----cacaca-aauu-g---u-ac-ag-u-----cuuac--uggau-ug----------------------------------------------------------------------------------------------------------------a--u-ugug-----------------------------------------------------------------------------------------------------------------------------------------------------------------------------------------------------------------------------------------------------------------------------------------------------------------------------------------------------------------------------------------------------------------------------cagu--ggagug-------g-uu-cc-aggaaa-ua-------------------------------------------------------------------------------------------------------------------------------gcu-ccacc-gu--aua----gaC-CGUA-CCCGAAACCGACACAGGUGG-UCAGGU-A-GAGUA-UACCAA-GGCGCUUGAG-AGAA-CUAUGUUG---------------AAGGAA-CUCGG-CA----------AAUUGCA-CGC-GUAAC--UUCG-GA-AG-AAGCGUG-A-CCCCU----uuu----------------uac---gcaa----gug---------------gag----AGGGG-UGGC-ACAGA-CCAGGGG-GU-AGCGACU-GUUUAUCAAAAACACAGGGC-UCUGCGAAGUCGCA-A------GAC-GA-C-GUAU-AGGGUCUGA-CGCCUGCCCGGU-GCUG-GAAGG-UUAAAAGGAGA-GGU------------G-CAA----------------------GCUUUGAAUUGAAG-CCCCAGUAAAC-GGC-GGCC-GUAACUAUAACGGU-CCUAAGGUAGCG-AAAUU-CCUU-GUC-GGGUAAGUUCCGACCUGCACGAA-UGGC-GUAACGA-CUUCCCC-GCUG-UCU-CCAA-CAUAGACUCAGUGAA-AUU-GAAUU-CC-CCGUG--AA-GAU-G-CGGGGUUCCUGCGGU-CAGACGGAAAGACCCCGUGCACCUU-UACUAUAGCUUUACACUGGCAUUCG-UGUCGGCAU-GUGUAGGAUAGGUGG-UAGGCUUU-GAA-G------CUU-GGACGCCAGUUCGAGU-GGAGCCAUC-C-UUGAAAUACCACCCU----UA-UCGUcAU-GGAU-GUCUAA-CCG-CG-G----UCCG---UUAUCCGGAUC-CGG-GACAGUGUAUGGUGGG-UAGU-UUGAC-U-GGGGCGGUCGCC-U-CCGAA-AGAGUA-ACGGAGGCGCGCGAUG-GUGGGCUCAGACCGGUCGGAAAUCGGUC-GUC---GAGUGCAAUGGCAUAA-GC-CCGCCUGACUGCGAGACUGACAAGUCGAGCAGAGACGAAAGU-CGG-UCAUAGUGAUC-CGGUGGUC-CC-G-CGUGGAAGGGCCAUCGCUCAAC-GGAUAAAAGGUA-CGC-CGGG-G-AU-AACAG-GCUGA--UGACCCCCAAG-A-G-UCC-AUA-UCGACGGGG-UU-GU-UUGGCACCU-CGAUGUCGGCUCAUCGCAUCCUGGGGCUGGAGC---A-GGUC-CC-AAGGGU-UU-GGCU-GUU-CGC--CAAUUA-AAGCGGU-AC-G-UGA-GCUGGGUUCA-GAACGU-CGUGA-GACAGUU-CGG-U-CCCU-AU-CUGCCGUGGG-UG-UAGGAAUAUU-GA-C-AGGAUC-UGU--------------CCCUAGUACGAGA-GGACC-GGGAUGGA-CAUAUCU--CUGGUGG--ACCUGUUGUCGU-GC-CA-ACGGCA-U-AGC-AGGGUA-GCU-AUAU-A-UGGAAUGGAUAACCGCUGAAGGCAUCUAAGC-GGGAAACCAA-CCUGAAA-ACGA-GUAUUCCCU---------------------------------------------------------------------------------------------------------------------------------------AU-CAGA-GC-CGUGGAAGACG-ACCACGUU-GAUAGGAC-GG-GUGUG-GAAGCAGG--GUAA---CCUGC-GA-AGCUU-A-CCGUUACUAAUA-GCUCG-AUUG-GCUUAA-UC-GU---------------------------------------------------------------------------------------------------------------------------------------------------
>Accession:X87282::SeqID:10527::TaxID:2
--------------------------------------------------------------------------------------------------------------------------------------------------------------------------guuauag----------GAUC-AAGC-G-AA----UAA-GUG-CAUA-UG-AUG-GAUG--CCU-UG-GC-GA-UCAC-A-GGC-GAUGAAG-GA--C-GC-GGUAG--CC-U-GC-G-AAAA-GCU-A-CGGG--GAGCU-G-GCAAACA----AGC-UU-UG-AUC-UGUAG-AUG-UC-CGAAUGGGGAAA-CCC--a-cc-gua--------------------------------------------------------------------------------------------------------------------------------------------------------------------------------------------------------------------------------------------guaa------------u-ac-ggu-AUCC-C-AUGC--U-----------------------------------------------------------------------------------------------------------------------------------------------------------------------------------------------------------------------------------------------CA-AUA-CA--UA----GGC-AU-G----U-G--G-AG-C-GAACCG-AGU-G-AACUGAACCAUCU-CA-GUA-ACUCGAG-GAAAAGA-AA-UC-A-A--CC------GA-GAUUCC-GG-AAG-UAGU-GGCG-AGCGA-AAC-CGGA-CCA-GCCU-----------------------------------------------------------------------------------------------------------------------------------------------------------------------------------------------------------------------------------------------------ggaug-----------------------------------------uuuuagcg--ua-gugaau--aG-UC-GAAU-G-G-A-A-U-GGAA-A-G-UCCA-GCCGUAG-CAGG-UGAUAGCCCUGU-A-GGC-gaa-auucag-ua--cguggaacuaa---gcau--cg-----------------------------------------------------------------------------AAC--AAGUA-GGG-C-GGGA--CAC-GUG-AAAUCCU-GU-C-U-GAAUAU--GGG-GGGACCAU--CC-UCC-AAGG-CUAA----AUA-CUCG-UGAUCGACC-GAUAGUG-AACC-AGUA-CCGUGA-GG-GA-AAGGCGAAAA-GAACCCC-GG-AA-GGGGA--GUGAAA-UAGAUCCUGAAA-UCGU--AUGCAUACAA-A-C-AGUA-GGA-GC-AC----C-----------------------------------------------------------------------------------------------------------------------------------------------------------------------------------------------------------------------------------------------------------------------------------------------------------------------------------------------------------------------------------------------------------------------------------------------------------------------------------------------------------------------------------------------------------------uucgu-----------------------------------------------G-GU--G-UGAC-UGCGUACCU-U-UUG-UAUAAUGGGUCAGCGACUU-AC-A-UUC-AGU-GGC----AAGCUUAA-CC--------GAAUA---GG-GG-AGGCGUA--GCGAAA-GCGAG-UCC-GAA---UAGGGCGa-u--------------------------------------------------------------------------------------------------------------------------------------------------------------------------------------------------------------------------------------------------------------------------------------------------------------------------------------------------uCAG-UCGCUGG-GUGUA-GACCCG-AAAC-C-AG-GCGA-UCUAUCCAUGG-CCAGGUUGAA-GGC-ACGGUA-ACAC-GUGCU-GGA-GGACCGAACC-CAC-UA-AU--GUUG-AAAAAUUA-GGGG-AUGAG-CUGUGGAUC-G-GAGU--GAAAGGCU-AAACAAGC-CUGG-AG-AUAGC-UGGUUCU-CUCCG--AAAA-CUAU-UUAG-GUAGUGC-CUCGUA-Ua-------U-UA-C--UG-CC-GGGGGUAG-AGC-ACU-GU-UAUGG-C-UA---GG-GGGUC--ACAGCGACUUACCAA-CCCAUG-GCAAACUCCGAA-UA-CCG-G-C-A--AGUAC----A-GUA-C-GGGAGACAGAG-CACCGGGUGCUAACGUCCGG--ACUC-AAGA-GGG-AAACAA-CCCAGACCGCCAGCUAAG-GU-CCCU-AAC-U-AUGG-C-UAA-GUG--------GGAAACGAAGUG-GGA-AGGCAUA--GACA-G-UCAGG-AGG-UUGGCUUAGAAGCAGCCAU--CCUUUAAAGAAAGC-GUAA-UA--------G-CUCAC-UGAU-------CGA------G-U-CGU-CC--UG-CGCGG--AAGAU-GUAA-C-GGGG--CU---AAGCC-AUA-G--ACC-GAA-G-CUGC-GGAU--GU-GUAC---------uau--------------------------------------------------------------------------------------------------------------------------------------------------------------------------------------------------------------------------------------------------------------------------------------------------------------------------------------------------------------------------------------------------------------------------------------------------------------------GUA-C-AC--AU-GG-UAGG--AGA-G-----CGUU-CC-G-UAA-------------------------------------------------------------------------------------------------------------------------G-C-CUG-U-GAA-GG-UG-U-U-CC--GUGA----G-GA--A-UG-CUGGAG-GU-AU-CG-GAA-GUGA-GAA-UGC-UGA--CAUG-AGUA--GCG--AUAA-A-GGG-GGUGA-AAA-GCCCC-CU---CGCC-GUA-AGU-C-CA-----------------------------------------------------AGG-UUU-CCU-G-CG-CAACG-UUC-AU-C--GG--CGCAGGGU--GAGU-CGGC-C-CCUAAGGCGAG--GC-A-----GAGA---U-G-C-GU-AGCUG--AUGG-GAAG-CGG-G--UU-AAUAUUC-CCGCAC-cg-u--cg-uag-agu-----------------------------------------------------------------------------------------------------------------------------gcgau------g-ggg--gga-cggau--ugcagaa--uguu-a---u-cg-gg-g-----ug--u--uggau-gu----------------------------------------------------------------------------------------------------------------c--c-ccgu--uggc-----------------gcauca--uagaa----------------------------------------------ggca-cuua-gg-ca-aa---u--cc--g--ggugcguaa-----------------------------------------------------------------------------------------------------------------------------------------------uuca-ag--ggugug-acug---ga---------------------------------------------------uaga-gc---uuc--g-----gcucua-------------------------------------aac----uaacu---ggaag---ca--g-uu-cc-aagaaa-agccuc--uaagcuuca-----------------------------------------------------------------------------------------------------------------gc-u-cua-cg---a-----gAC-CGUA-CCGCAAACCGACACAGGUGG-ACGGGA-U-GAAUA-UUCCAA-GGCGCUUGAG-AGAA-CUCAGGAG---------------AAGGAA-CUCGG-CA----------AAUUAAU-ACC-GUAAC--UUCG-GG-AG-AAGGUAU-G-CCUCauua-gugug-a---------u-gugc---cugc----gcac-a---------aagcau-g-aagagg-CCGC-AGUGA-AUCGGUG-GC-UGCGACU-GUUUACUAAAAACACAGCAC-UCUGCAAACACGAA-A------GUG-GA-C-GUAU-AGGGUGUGA-CGCCUGCCCGGU-GCCG-GAAGG-UUAAGUGAUGG-GGU------------G-CAA----------------------GCUCUUGAUCGAAG-CCCCGGUAAAC-GGC-GGCC-GUAACUAUAACGGU-CCUAAGGUAGCG-AAAUU-CCUU-GUC-GGGUAAGUUCCGACCUGCACGAA-UGGC-GUAACGA-UGGCCAC-ACUG-UCU-CCUC-CUGAGACUCAGCGAA-GUU-GACAU-GG-UUGUG--AU-GAU-G-CAAUCUCCCCGCGGC-UAGACGGAAAGACCCCAUGAACCUU-UACUGUAGCUUUGCAUUGGAUUGUG-AACCGGCCU-GUGUAGGAUAGGUGG-GAGACGUU-GAA-G------CGU-GGUCGCCAGAUCGCGU-GGAGUCAUC-C-UUGAAAUACCACCCU----GG-UCUGUUU-GCGG-UUCUAA-CCU-AG-G----UCCC---UUAUCGGGAUC-GGG-GACCGUGCAUGGUGGG-CAGU-UUGAC-U-GGGGCGGUCUCC-U-CCUAA-AGUGUA-ACGGAGGAGUUCGAAG-GUACGCUAGAGACGGUCGGAAAUCGUCU-UGA---UAGUGCAAUGGCAUAA-GC-GUGCUUGACUGUGAGACUGACAAGUCGAACAGGUACGAAAGU-AGG-ACAUAGUGAUC-CGGUGGUU-CU-G-UAUGGAAGGGCCAUCGCUCAAC-GGAUAAAAGGUA-CUC-UGGG-G-AU-AACAG-GCUGA--UACCGCCCAAG-A-G-UUC-AUA-UCGACGGCG-GU-GU-UUGGCACCU-CGAUGUCGGCUCAUCUCAUCCUGGGGCUGUAGC---C-GGUC-CC-AAGGGU-AU-GGCU-GUU-CGC--CAUUUA-AAGAGGU-AC-G-UGA-GCUGGGUUUA-AAACGU-CGUGA-GACAGUU-UGG-U-CCCU-AU-CUGCCGUGGG-CG-UUGGAUAUUU-GA-C-GGA-GCCUGC--------------UCCUAGUACGAGA-GGACC-GGAGUGGA-CGUACCA--CUGGUGU--AUCGGUUGUCAU-GC-CA-AUGGCA-U-UGC-CGAGUA-GCU-ACGU-A-CGGAAGAGAUAACCGCUGAAGGCAUCUAAGC-GGGAAACUCG-UCUGAAG-AUUA-GAUAUCCC-G-GAGG------------cuuga--------------------------------------------------------------------------------------------------------CCUC-C-CUG-UAGG-GU-CGUCCGAGACC-AGGACGUU-GAUAGGCU-GG-GUGUG-GAAGUGCA--GUAA---UGCAU-GU-AGCUA-A-CCAGUACUAAUU-GCCCG-UGUG-GCUUGA-UC-CUauaaccc--------------------------------------------------------------------------------------------------------------------------------------------
>Accession:CP000117::SeqID:15097::TaxID:2
-------------------------------------------------------------------------------------------------------------------------------------------------------------------------------------------GGUC-AAGC-U-AA----UAA-GGG-CUAA-UG-GUG-GAUA--CCU-AG-GC-AC-ACAG-A-GGC-GAAGAAG-GA--C-GU-GGUUA--CC-G-AC-G-AAAU-ACU-C-CGGG--GAGUU-G-GA-AGCA----AAC-UA-UG-AGC-CGGAG-AUG-UC-CGAAUGGGGCAA-CCC-----------------------------------------------------------------------------------------------------------------------------------------------------------------------------------------------------------------------------------------------------uaaau---------------------ACUA-C-CUGU--U-----------------------------------------------------------------------------------------------------------------------------------------------------------------------------------------------------------------------------------------------GA-AUA-UA--UA----GAC-AG-G---AA-A--G-AG-C-CAACCC-AGC-G-AACUGAAACAUCU-UA-GUA-GCUGGAG-GAAGAGA-AA-UC-A-A--AA------GA-GAUUCC-CU-GAG-UAGU-GGUG-AGCGA-AAG-GGGA-AGA-GCCUA-A-A-ccaguu-gg--------------uuua------------------cugacugg-gguagu--ggga--------------------------------------------------------------------------------------------------------------------------------------------------------------------------ca-gcgau----------------------------------------aucgaaucu---a-gagauu--aG-AC-GAAG-C-A-G-C-U--AAA-U-A-CUGC-ACCAGAG-AAAG-UGAAAGUCUUGU-A-GUC-gaa-aauuga-ag-gauagua----------gc--ug-aa--uccc-------------------------------------------------------------------------GAGUA-GCA-U-GGGG--CAC-GAG-GAAUCCC-AU-G-U-GAAUCA--GCG-AGGACCAU--CU-CGU-AAGG-CUAA----AUA-CUAC-UGUGUGACC-GAUAGUG-AACC-AGUA-CCGCGA-GG-GA-AAGGUGAAAA-GAACCCC-gc-aa-GGGGA--GUGAAA-UAGAACAUGAAA-CCAU--UAGCUUACAA-G-C-AGUG-GGA-GU-CC----G----------------------------------------------------------------------------------------------------------------------------------------------------------------------------------------------------------------------------------------------------------------------------------------------------------------------------------------------------------------------------------------------------------------------------------------------------------------------------------------------------------------------------------------------------------------auuaaa-----------------------------------------------C-GG--A-UGAC-CGCGUGCCU-G-UUG-AAGAAUGAGCCGGCGACUU-AU-A-GGC-ACU-GGU-----AGGUUAA-gac-g-----agaa-u-guc-GG-AGCCAAA--GGGAAA-CCGAG-UCU-GAA---AAGGGCG-----------------------------------------------------------------------------------------------------------------------------------------------------------------------------------------------------------------------------------------------------------------------------------------------------------------------------------------------------auaA-UCAGUGU-UUAUA-GACCCG-AACC-C-UG-GUGA-UCUAACCAUGG-CCAGGAUGAA-GCU-UGGGUA-ACAC-CAAGU-GGA-GGUCCGAACC-GAC-CG-AU--GUUG-AAAAAUCG-GCGG-AUGAG-UUGUGGUUA-G-GGGU--GAAAUGCC-AAUCGAAC-CAGG-AG-CUAGC-UGGUUCU-CCCCG--AAAU-GUGU-UGAG-GCGCAGC-GGUAAU-GAU------u-au-a--GU-CG-GGGGGUAA-AGC-ACU-GU-UUCGG-U-GC---GG-GCUGG--gaga-CCGGUACCAA-AUCGAG-ACAAACUCAGAA-UA-CCC-G-A-U--ggac-----a-CAU-U-GCCAGUGAGAC--GGUGGGGGAUAAGCUUCAU--CGUC-AAGA-GGG-AAACAG-CCCAGACCACCAGCUAAG-GU-CCCC-AAAUC-AUCG-C-UAA-GUG--------AUAAAGGAGGUG-AGA-UUGCCUA--GACA-A-CUAGG-AGG-UUUGCCUAGAAGCAGCCAC--CCUUGAAAGAGUGC-GUAA-UA--------G-CUCAC-UAGU-------CAA------G-C-GAU-CU--UG-CGCCG--AAAAU-G-AA-C-GGGG--CU---AAGCG-AUG-U--ACC-GAA-G-CUGU-GGga--uu-aa-----------cuaaaca------------------------------------------------------------------------------------------------------------------------------------------------------------------------------------------------------------------------------------------------------------------------------------------------------------------------------------------------------------------------------------------------------------------------------------------------------------------u-u-aa--uc-GG-UAGG--GGA-G-----CGUU-CC-G-UAG-------------------------------------------------------------------------------------------------------------------------U-A-GGA-A-GAA-GC-AG-U-A-GC--GGCAA---G-CA--G-CU-GUGGAC-GA-GA-CG-GAA-GUGA-GAA-UGU-CGG--CUUG-AGUA--GCG--CAAA-C-AUU-GGUGA-GAA-UCCAA-UG---CCCC-GAA-ACC-C-UA-----------------------------------------------------AGG-GUU-CCA-G-AG-CCAGG-UUC-GU-C--CA--CUCUGGGU--UAGU-CGGG-A-CCUAAGGCGAG--GC-C-----GAAA---G-G-C-GU-AGUCG--AUGG-ACAC-AGG-G--UC-AACAAUC-CCUGAC-ua-u--gg-uau-gg----------------------------------------------------------------ga-gcauugcu-----------------------------------------------------------------ag--gga-cgcau--gaaagau--agcu-a-----cg-cc-c------ugau--ugguu----------------------------------------------------------------------------------------------------------------------------------------------------ugg-------------------------------------------------------gagg-ag-u-uuacg-aa-------------cuccg--------------------------------------------------------------------------------------------------------------------------------------------------ag--uagugaaggau--agug-------------------------------------------------------------------------------------------------------------------------u-------------------------------c-aagaaa-agcu------ag----u-------------------------------------------------------------------------------------------------------------aaugugaugaacauau-cgu----aCC-CGUA-CCCGAAACCGACACAGGUAG-GGAGGU-U-GAGAA-UACCAA-GGGGCGCGAG-AUAA-CUCUCUCU---------------AAGGAA-CUCGG-CA----------AAAUGGC-CCC-GUAAC--UUCG-GA-AG-AAGGGGU-G-CCCAC----------------------------cgauga-g--------------------------GUGGG-UCGC-AGUGA-AGAGAUC-CA-GGCGACU-GUUUACCAAAAACACAGGUC-UCCGCAAACUCGUA-A------GAG-GA-A-GUAU-GGGGGCUGA-CGCCUGCCCAGU-GCCG-GAAGG-UUAAGGAAGUU-GGUCA-GGGC-----G-AAA--------------GUUUGA-AGCUGACGACCGAAG-CCCCGGUGAAC-GGC-GGCC-GUAACUAUAACGGU-CCUAAGGUAGCG-AAAUU-CCUU-GUC-GGGUAAGUUCCGACCCGCACGAA-AGGC-GUAACGA-UCUGGAU-GGUG-UCU-CAGA-GAGAGACUCGGCGAA-AUA-GGAAU-GU-CUGUG--AA-GAU-A-CGGACUGCCUGCACC-UGGACAGAAAGACCCUAUGAAGCUU-UACUGUAGCCUGGAAUUGUGUCCGG-GCUUCGCUU-GCGCAGGAUAGGUGG-GAAGCGAU-GAA-G------UAU-UCCUUGUGGGGAAUAU-GGAGCUAAC-G-GUGAGAUACCACUCU----GG-CGAAGCU-AGGA-UUCUAA-CUU--A-U---UUCCG---UGAUCCGGAAA-AAG-GACAGUUUCAGGUGGG-CAGU-UUGAC-U-GGGGCGGUCGCC-U-CCUAA-AAGGUA-ACGGAGGCGCGCAAAG-GUUCCCUCAGCACGCUUGGAAACCGUGC-GGC---GAGUGUAAAGGCAUAAAGG-GAGCUUGACUGCAAGACCGACAAGUCGAGCAGGUACGAAAGU-AGG-CCUUAGUGAUC-CGACGGCG-CA-G-AAUGGAAUGGCCGUCGCUCAAC-GGAUAAAAGUUA-CUC-UAGG-G-AU-AACAG-GCUGA--UCUCCCCCAAG-A-G-UCC-ACA-UCGACGGGG-AG-GU-UUGGCACCU-CGAUGUCGGCUCAUCGCAACCUGGGGCGGAAGU---A-CGUC-CC-AAGGGU-UG-GGCU-GUU-CGC--CCAUUA-AAGCGGU-AC-G-UGA-GCUGGGUUCA-GAACGU-CGUGA-GACAGUU-CGG-U-CCAU-AU-CCGGUGCAGG-CG-UAAGAGCAUU-GA-G-AGGAGC-CUU--------------CCUUAGUACGAGA-GGACC-GGGAAGGA-CGCACCG--CUGGUGU--ACCAGUUAUUGU-AC-CC-GCAGUAGA-CGC-UGGGUA-GCC-AAGU-G-CGGAGCGGAUAACCGCUGAAAGCAUCUAAGU-GGGAAGCCCA-CCUCAAG-AUGA-GUGCUCUCAC-UAC--------------ACCA-------------------------------------------------------------------------------------------A-------------GUA-G--GU-AAGG-UC-ACGGGCAGAAC-ACCCGUU--UAUAGGCU-CU-AAGUG-GAAGUGCA--GUAA---UGUAU-GA-AGCUG-A-GGAGUACUAACA-GACCG-A-GG-GCUUGA-CC-UC---------------------------------------------------------------------------------------------------------------------------------------------------
>Accession:CP000117::SeqID:15098::TaxID:2
-------------------------------------------------------------------------------------------------------------------------------------------------------------------------------------------GGUC-AAGC-U-AA----UAA-GGG-CUAA-UG-GUG-GAUA--CCU-AG-GC-AC-ACAG-A-GGC-GAAGAAG-GA--C-GU-GGUUA--CC-G-AC-G-AAAU-ACU-C-CGGG--GAGUU-G-GA-AGCA----AAC-UA-UG-AGC-CGGAG-AUG-UC-CGAAUGGGGCAA-CCC-----------------------------------------------------------------------------------------------------------------------------------------------------------------------------------------------------------------------------------------------------uaaau---------------------ACUA-C-CUGU--U-----------------------------------------------------------------------------------------------------------------------------------------------------------------------------------------------------------------------------------------------GA-AUA-UA--UA----GAC-AG-G---AA-A--G-AG-C-CAACCC-AGC-G-AACUGAAACAUCU-UA-GUA-GCUGGAG-GAAGAGA-AA-UC-A-A--AA------GA-GAUUCC-CU-GAG-UAGU-GGUG-AGCGA-AAG-GGGA-AGA-GCCUA-A-A-ccaguu-gg--------------uuua------------------cugacugg-gguagu--ggga--------------------------------------------------------------------------------------------------------------------------------------------------------------------------ca-gcgau----------------------------------------aucgaaucu---a-gagauu--aG-AC-GAAG-C-A-G-C-U--AAA-U-A-CUGC-ACCAGAG-AAAG-UGAAAGUCUUGU-A-GUC-gaa-aauuga-ag-gauagua----------gc--ug-aa--uccc-------------------------------------------------------------------------GAGUA-GCA-U-GGGG--CAC-GAG-GAAUCCC-AU-G-U-GAAUCA--GCG-AGGACCAU--CU-CGU-AAGG-CUAA----AUA-CUAC-UGUGUGACC-GAUAGUG-AACC-AGUA-CCGCGA-GG-GA-AAGGUGAAAA-GAACCCC-gc-aa-GGGGA--GUGAAA-UAGAACAUGAAA-CCAU--UAGCUUACAA-G-C-AGUG-GGA-GU-CC----G----------------------------------------------------------------------------------------------------------------------------------------------------------------------------------------------------------------------------------------------------------------------------------------------------------------------------------------------------------------------------------------------------------------------------------------------------------------------------------------------------------------------------------------------------------------auuaaa-----------------------------------------------C-GG--A-UGAC-CGCGUGCCU-G-UUG-AAGAAUGAGCCGGCGACUU-AU-A-GGC-ACU-GGU-----AGGUUAA-gac-g-----agaa-u-guc-GG-AGCCAAA--GGGAAA-CCGAG-UCU-GAA---AAGGGCG-----------------------------------------------------------------------------------------------------------------------------------------------------------------------------------------------------------------------------------------------------------------------------------------------------------------------------------------------------auaA-UCAGUGU-UUAUA-GACCCG-AACC-C-UG-GUGA-UCUAACCAUGG-CCAGGAUGAA-GCU-UGGGUA-ACAC-CAAGU-GGA-GGUCCGAACC-GAC-CG-AU--GUUG-AAAAAUCG-GCGG-AUGAG-UUGUGGUUA-G-GGGU--GAAAUGCC-AAUCGAAC-CAGG-AG-CUAGC-UGGUUCU-CCCCG--AAAU-GUGU-UGAG-GCGCAGC-GGUAAU-GAU------u-au-a--GU-CG-GGGGGUAA-AGC-ACU-GU-UUCGG-U-GC---GG-GCUGG--gaga-CCGGUACCAA-AUCGAG-ACAAACUCAGAA-UA-CCC-G-A-U--ggac-----a-CAU-U-GCCAGUGAGAC--GGUGGGGGAUAAGCUUCAU--CGUC-AAGA-GGG-AAACAG-CCCAGACCACCAGCUAAG-GU-CCCC-AAAUC-AUCG-C-UAA-GUG--------AUAAAGGAGGUG-AGA-UUGCCUA--GACA-A-CUAGG-AGG-UUUGCCUAGAAGCAGCCAC--CCUUGAAAGAGUGC-GUAA-UA--------G-CUCAC-UAGU-------CAA------G-C-GAU-CU--UG-CGCCG--AAAAU-G-AA-C-GGGG--CU---AAGCG-AUG-U--ACC-GAA-G-CUGU-GGga--uu-aa-----------cuaaaca------------------------------------------------------------------------------------------------------------------------------------------------------------------------------------------------------------------------------------------------------------------------------------------------------------------------------------------------------------------------------------------------------------------------------------------------------------------u-u-aa--uc-GG-UAGG--GGA-G-----CGUU-CC-G-UAG-------------------------------------------------------------------------------------------------------------------------U-A-GGA-A-GAA-GC-AG-U-A-GC--GGCAA---G-CA--G-CU-GUGGAC-GA-GA-CG-GAA-GUGA-GAA-UGU-CGG--CUUG-AGUA--GCG--CAAA-C-AUU-GGUGA-GAA-UCCAA-UG---CCCC-GAA-ACC-C-UA-----------------------------------------------------AGG-GUU-CCA-G-AG-CCAGG-UUC-GU-C--CA--CUCUGGGU--UAGU-CGGG-A-CCUAAGGCGAG--GC-C-----GAAA---G-G-C-GU-AGUCG--AUGG-ACAC-AGG-G--UC-AACAAUC-CCUGAC-ua-u--gg-uau-gg----------------------------------------------------------------ga-gcauugcu-----------------------------------------------------------------ag--gga-cgcau--gaaagau--agcu-a-----cg-cc-c------ugau--ugguu----------------------------------------------------------------------------------------------------------------------------------------------------ugg-------------------------------------------------------gagg-ag-u-uuacg-aa-------------cuccg--------------------------------------------------------------------------------------------------------------------------------------------------ag--uagugaaggau--agug-------------------------------------------------------------------------------------------------------------------------u-------------------------------c-aagaaa-agcu------ag----u-------------------------------------------------------------------------------------------------------------aaugugaugaacauau-cgu----aCC-CGUA-CCCGAAACCGACACAGGUAG-GGAGGU-U-GAGAA-UACCAA-GGGGCGCGAG-AUAA-CUCUCUCU---------------AAGGAA-CUCGG-CA----------AAAUGGC-CCC-GUAAC--UUCG-GA-AG-AAGGGGU-G-CCCAC----------------------------cgauga-g--------------------------GUGGG-UCGC-AGUGA-AGAGAUC-CA-GGCGACU-GUUUACCAAAAACACAGGUC-UCCGCAAACUCGUA-A------GAG-GA-A-GUAU-GGGGGCUGA-CGCCUGCCCAGU-GCCG-GAAGG-UUAAGGAAGUU-GGUCA-GGGC-----G-AAA--------------GUUUGA-AGCUGACGACCGAAG-CCCCGGUGAAC-GGC-GGCC-GUAACUAUAACGGU-CCUAAGGUAGCG-AAAUU-CCUU-GUC-GGGUAAGUUCCGACCCGCACGAA-AGGC-GUAACGA-UCUGGAU-GGUG-UCU-CAGA-GAGAGACUCGGCGAA-AUA-GGAAU-GU-CUGUG--AA-GAU-A-CGGACUGCCUGCACC-UGGACAGAAAGACCCUAUGAAGCUU-UACUGUAGCCUGGAAUUGUGUCCGG-GCUUCGCUU-GCGCAGGAUAGGUGG-GAAGCGAU-GAA-G------UAU-UCCUUGUGGGGAAUAU-GGAGCUAAC-G-GUGAGAUACCACUCU----GG-CGAAGCU-AGGA-UUCUAA-CUU--A-U---UUCCG---UGAUCCGGAAA-AAG-GACAGUUUCAGGUGGG-CAGU-UUGAC-U-GGGGCGGUCGCC-U-CCUAA-AAGGUA-ACGGAGGCGCGCAAAG-GUUCCCUCAGCACGCUUGGAAACCGUGC-GGC---GAGUGUAAAGGCAUAAAGG-GAGCUUGACUGCAAGACCGACAAGUCGAGCAGGUACGAAAGU-AGG-CCUUAGUGAUC-CGACGGCG-CA-G-AAUGGAAUGGCCGUCGCUCAAC-GGAUAAAAGUUA-CUC-UAGG-G-AU-AACAG-GCUGA--UCUCCCCCAAG-A-G-UCC-ACA-UCGACGGGG-AG-GU-UUGGCACCU-CGAUGUCGGCUCAUCGCAACCUGGGGCGGAAGU---A-CGUC-CC-AAGGGU-UG-GGCU-GUU-CGC--CCAUUA-AAGCGGU-AC-G-UGA-GCUGGGUUCA-GAACGU-CGUGA-GACAGUU-CGG-U-CCAU-AU-CCGGUGCAGG-CG-UAAGAGCAUU-GA-G-AGGAGC-CUU--------------CCUUAGUACGAGA-GGACC-GGGAAGGA-CGCACCG--CUGGUGU--ACCAGUUAUUGU-AC-CC-GCAGUAGA-CGC-UGGGUA-GCC-AAGU-G-CGGAGCGGAUAACCGCUGAAAGCAUCUAAGU-GGGAAGCCCA-CCUCAAG-AUGA-GUGCUCUCAC-UAC--------------ACCA-------------------------------------------------------------------------------------------A-------------GUA-G--GU-AAGG-UC-ACGGGCAGAAC-ACCCGUU--UAUAGGCU-CU-AAGUG-GAAGUGCA--GUAA---UGUAU-GA-AGCUG-A-GGAGUACUAACA-GACCG-A-GG-GCUUGA-CC-UC---------------------------------------------------------------------------------------------------------------------------------------------------
>Accession:CP000117::SeqID:15099::TaxID:2
-------------------------------------------------------------------------------------------------------------------------------------------------------------------------------------------GGUC-AAGC-U-AA----UAA-GGG-CUAA-UG-GUG-GAUA--CCU-AG-GC-AC-ACAG-A-GGC-GAAGAAG-GA--C-GU-GGUUA--CC-G-AC-G-AAAU-ACU-C-CGGG--GAGUU-G-GA-AGCA----AAC-UA-UG-AGC-CGGAG-AUG-UC-CGAAUGGGGCAA-CCC-----------------------------------------------------------------------------------------------------------------------------------------------------------------------------------------------------------------------------------------------------uaaau---------------------ACUA-C-CUGU--U-----------------------------------------------------------------------------------------------------------------------------------------------------------------------------------------------------------------------------------------------GA-AUA-UA--UA----GAC-AG-G---AA-A--G-AG-C-CAACCC-AGC-G-AACUGAAACAUCU-UA-GUA-GCUGGAG-GAAGAGA-AA-UC-A-A--AA------GA-GAUUCC-CU-GAG-UAGU-GGUG-AGCGA-AAG-GGGA-AGA-GCCUA-A-A-ccaguu-gg--------------uuua------------------cugacugg-gguagu--ggga--------------------------------------------------------------------------------------------------------------------------------------------------------------------------ca-gcgau----------------------------------------aucgaaucu---a-gagauu--aG-AC-GAAG-C-A-G-C-U--AAA-U-A-CUGC-ACCAGAG-AAAG-UGAAAGUCUUGU-A-GUC-gaa-aauuga-ag-gauagua----------gc--ug-aa--uccc-------------------------------------------------------------------------GAGUA-GCA-U-GGGG--CAC-GAG-GAAUCCC-AU-G-U-GAAUCA--GCG-AGGACCAU--CU-CGU-AAGG-CUAA----AUA-CUAC-UGUGUGACC-GAUAGUG-AACC-AGUA-CCGCGA-GG-GA-AAGGUGAAAA-GAACCCC-gc-aa-GGGGA--GUGAAA-UAGAACAUGAAA-CCAU--UAGCUUACAA-G-C-AGUG-GGA-GU-CC----G----------------------------------------------------------------------------------------------------------------------------------------------------------------------------------------------------------------------------------------------------------------------------------------------------------------------------------------------------------------------------------------------------------------------------------------------------------------------------------------------------------------------------------------------------------------auuaaa-----------------------------------------------C-GG--A-UGAC-CGCGUGCCU-G-UUG-AAGAAUGAGCCGGCGACUU-AU-A-GGC-ACU-GGU-----AGGUUAA-gac-g-----agaa-u-guc-GG-AGCCAAA--GGGAAA-CCGAG-UCU-GAA---AAGGGCG-----------------------------------------------------------------------------------------------------------------------------------------------------------------------------------------------------------------------------------------------------------------------------------------------------------------------------------------------------auaA-UCAGUGU-UUAUA-GACCCG-AACC-C-UG-GUGA-UCUAACCAUGG-CCAGGAUGAA-GCU-UGGGUA-ACAC-CAAGU-GGA-GGUCCGAACC-GAC-CG-AU--GUUG-AAAAAUCG-GCGG-AUGAG-UUGUGGUUA-G-GGGU--GAAAUGCC-AAUCGAAC-CAGG-AG-CUAGC-UGGUUCU-CCCCG--AAAU-GUGU-UGAG-GCGCAGC-GGUAAU-GAU------u-au-a--GU-CG-GGGGGUAA-AGC-ACU-GU-UUCGG-U-GC---GG-GCUGG--gaga-CCGGUACCAA-AUCGAG-ACAAACUCAGAA-UA-CCC-G-A-U--ggac-----a-CAU-U-GCCAGUGAGAC--GGUGGGGGAUAAGCUUCAU--CGUC-AAGA-GGG-AAACAG-CCCAGACCACCAGCUAAG-GU-CCCC-AAAUC-AUCG-C-UAA-GUG--------AUAAAGGAGGUG-AGA-UUGCCUA--GACA-A-CUAGG-AGG-UUUGCCUAGAAGCAGCCAC--CCUUGAAAGAGUGC-GUAA-UA--------G-CUCAC-UAGU-------CAA------G-C-GAU-CU--UG-CGCCG--AAAAU-G-AA-C-GGGG--CU---AAGCG-AUG-U--ACC-GAA-G-CUGU-GGga--uu-aa-----------cuaaaca------------------------------------------------------------------------------------------------------------------------------------------------------------------------------------------------------------------------------------------------------------------------------------------------------------------------------------------------------------------------------------------------------------------------------------------------------------------u-u-aa--uc-GG-UAGG--GGA-G-----CGUU-CC-G-UAG-------------------------------------------------------------------------------------------------------------------------U-A-GGA-A-GAA-GC-AG-U-A-GC--GGCAA---G-CA--G-CU-GUGGAC-GA-GA-CG-GAA-GUGA-GAA-UGU-CGG--CUUG-AGUA--GCG--CAAA-C-AUU-GGUGA-GAA-UCCAA-UG---CCCC-GAA-ACC-C-UA-----------------------------------------------------AGG-GUU-CCA-G-AG-CCAGG-UUC-GU-C--CA--CUCUGGGU--UAGU-CGGG-A-CCUAAGGCGAG--GC-C-----GAAA---G-G-C-GU-AGUCG--AUGG-ACAC-AGG-G--UC-AACAAUC-CCUGAC-ua-u--gg-uau-gg----------------------------------------------------------------ga-gcauugcu-----------------------------------------------------------------ag--gga-cgcau--gaaagau--agcu-a-----cg-cc-c------ugau--ugguu----------------------------------------------------------------------------------------------------------------------------------------------------ugg-------------------------------------------------------gagg-ag-u-uuacg-aa-------------cuccg--------------------------------------------------------------------------------------------------------------------------------------------------ag--uagugaaggau--agug-------------------------------------------------------------------------------------------------------------------------u-------------------------------c-aagaaa-agcu------ag----u-------------------------------------------------------------------------------------------------------------aaugugaugaacauau-cgu----aCC-CGUA-CCCGAAACCGACACAGGUAG-GGAGGU-U-GAGAA-UACCAA-GGGGCGCGAG-AUAA-CUCUCUCU---------------AAGGAA-CUCGG-CA----------AAAUGGC-CCC-GUAAC--UUCG-GA-AG-AAGGGGU-G-CCCAC----------------------------cgauga-g--------------------------GUGGG-UCGC-AGUGA-AGAGAUC-CA-GGCGACU-GUUUACCAAAAACACAGGUC-UCCGCAAACUCGUA-A------GAG-GA-A-GUAU-GGGGGCUGA-CGCCUGCCCAGU-GCCG-GAAGG-UUAAGGAAGUU-GGUCA-GGGC-----G-AAA--------------GUUUGA-AGCUGACGACCGAAG-CCCCGGUGAAC-GGC-GGCC-GUAACUAUAACGGU-CCUAAGGUAGCG-AAAUU-CCUU-GUC-GGGUAAGUUCCGACCCGCACGAA-AGGC-GUAACGA-UCUGGAU-GGUG-UCU-CAGA-GAGAGACUCGGCGAA-AUA-GGAAU-GU-CUGUG--AA-GAU-A-CGGACUGCCUGCACC-UGGACAGAAAGACCCUAUGAAGCUU-UACUGUAGCCUGGAAUUGUGUCCGG-GCUUCGCUU-GCGCAGGAUAGGUGG-GAAGCGAU-GAA-G------UAU-UCCUUGUGGGGAAUAU-GGAGCUAAC-G-GUGAGAUACCACUCU----GG-CGAAGCU-AGGA-UUCUAA-CUU--A-U---UUCCG---UGAUCCGGAAA-AAG-GACAGUUUCAGGUGGG-CAGU-UUGAC-U-GGGGCGGUCGCC-U-CCUAA-AAGGUA-ACGGAGGCGCGCAAAG-GUUCCCUCAGCACGCUUGGAAACCGUGC-GGC---GAGUGUAAAGGCAUAAAGG-GAGCUUGACUGCAAGACCGACAAGUCGAGCAGGUACGAAAGU-AGG-CCUUAGUGAUC-CGACGGCG-CA-G-AAUGGAAUGGCCGUCGCUCAAC-GGAUAAAAGUUA-CUC-UAGG-G-AU-AACAG-GCUGA--UCUCCCCCAAG-A-G-UCC-ACA-UCGACGGGG-AG-GU-UUGGCACCU-CGAUGUCGGCUCAUCGCAACCUGGGGCGGAAGU---A-CGUC-CC-AAGGGU-UG-GGCU-GUU-CGC--CCAUUA-AAGCGGU-AC-G-UGA-GCUGGGUUCA-GAACGU-CGUGA-GACAGUU-CGG-U-CCAU-AU-CCGGUGCAGG-CG-UAAGAGCAUU-GA-G-AGGAGC-CUU--------------CCUUAGUACGAGA-GGACC-GGGAAGGA-CGCACCG--CUGGUGU--ACCAGUUAUUGU-AC-CC-GCAGUAGA-CGC-UGGGUA-GCC-AAGU-G-CGGAGCGGAUAACCGCUGAAAGCAUCUAAGU-GGGAAGCCCA-CCUCAAG-AUGA-GUGCUCUCAC-UAC--------------ACCA-------------------------------------------------------------------------------------------A-------------GUA-G--GU-AAGG-UC-ACGGGCAGAAC-ACCCGUU--UAUAGGCU-CU-AAGUG-GAAGUGCA--GUAA---UGUAU-GA-AGCUG-A-GGAGUACUAACA-GACCG-A-GG-GCUUGA-CC-UC---------------------------------------------------------------------------------------------------------------------------------------------------
>Accession:CP000117::SeqID:15100::TaxID:2
-------------------------------------------------------------------------------------------------------------------------------------------------------------------------------------------GGUC-AAGC-U-AA----UAA-GGG-CUAA-UG-GUG-GAUA--CCU-AG-GC-AC-ACAG-A-GGC-GAAGAAG-GA--C-GU-GGUUA--CC-G-AC-G-AAAU-ACU-C-CGGG--GAGUU-G-GA-AGCA----AAC-UA-UG-AGC-CGGAG-AUG-UC-CGAAUGGGGCAA-CCC-----------------------------------------------------------------------------------------------------------------------------------------------------------------------------------------------------------------------------------------------------uaaau---------------------ACUA-C-CUGU--U-----------------------------------------------------------------------------------------------------------------------------------------------------------------------------------------------------------------------------------------------GA-AUA-UA--UA----GAC-AG-G---AA-A--G-AG-C-CAACCC-AGC-G-AACUGAAACAUCU-UA-GUA-GCUGGAG-GAAGAGA-AA-UC-A-A--AA------GA-GAUUCC-CU-GAG-UAGU-GGUG-AGCGA-AAG-GGGA-AGA-GCCUA-A-A-ccaguu-gg--------------uuua------------------cugacugg-gguagu--ggga--------------------------------------------------------------------------------------------------------------------------------------------------------------------------ca-gcgau----------------------------------------aucgaaucu---a-gagauu--aG-AC-GAAG-C-A-G-C-U--AAA-U-A-CUGC-ACCAGAG-AAAG-UGAAAGUCUUGU-A-GUC-gaa-aauuga-ag-gauagua----------gc--ug-aa--uccc-------------------------------------------------------------------------GAGUA-GCA-U-GGGG--CAC-GAG-GAAUCCC-AU-G-U-GAAUCA--GCG-AGGACCAU--CU-CGU-AAGG-CUAA----AUA-CUAC-UGUGUGACC-GAUAGUG-AACC-AGUA-CCGCGA-GG-GA-AAGGUGAAAA-GAACCCC-gc-aa-GGGGA--GUGAAA-UAGAACAUGAAA-CCAU--UAGCUUACAA-G-C-AGUG-GGA-GU-CC----G----------------------------------------------------------------------------------------------------------------------------------------------------------------------------------------------------------------------------------------------------------------------------------------------------------------------------------------------------------------------------------------------------------------------------------------------------------------------------------------------------------------------------------------------------------------auuaaa-----------------------------------------------C-GG--A-UGAC-CGCGUGCCU-G-UUG-AAGAAUGAGCCGGCGACUU-AU-A-GGC-ACU-GGU-----AGGUUAA-gac-g-----agaa-u-guc-GG-AGCCAAA--GGGAAA-CCGAG-UCU-GAA---AAGGGCG-----------------------------------------------------------------------------------------------------------------------------------------------------------------------------------------------------------------------------------------------------------------------------------------------------------------------------------------------------auaA-UCAGUGU-UUAUA-GACCCG-AACC-C-UG-GUGA-UCUAACCAUGG-CCAGGAUGAA-GCU-UGGGUA-ACAC-CAAGU-GGA-GGUCCGAACC-GAC-CG-AU--GUUG-AAAAAUCG-GCGG-AUGAG-UUGUGGUUA-G-GGGU--GAAAUGCC-AAUCGAAC-CAGG-AG-CUAGC-UGGUUCU-CCCCG--AAAU-GUGU-UGAG-GCGCAGC-GGUAAU-GAU------u-au-a--GU-CG-GGGGGUAA-AGC-ACU-GU-UUCGG-U-GC---GG-GCUGG--gaga-CCGGUACCAA-AUCGAG-ACAAACUCAGAA-UA-CCC-G-A-U--ggac-----a-CAU-U-GCCAGUGAGAC--GGUGGGGGAUAAGCUUCAU--CGUC-AAGA-GGG-AAACAG-CCCAGACCACCAGCUAAG-GU-CCCC-AAAUC-AUCG-C-UAA-GUG--------AUAAAGGAGGUG-AGA-UUGCCUA--GACA-A-CUAGG-AGG-UUUGCCUAGAAGCAGCCAC--CCUUGAAAGAGUGC-GUAA-UA--------G-CUCAC-UAGU-------CAA------G-C-GAU-CU--UG-CGCCG--AAAAU-G-AA-C-GGGG--CU---AAGCG-AUG-U--ACC-GAA-G-CUGU-GGga--uu-aa-----------cuaaaca------------------------------------------------------------------------------------------------------------------------------------------------------------------------------------------------------------------------------------------------------------------------------------------------------------------------------------------------------------------------------------------------------------------------------------------------------------------u-u-aa--uc-GG-UAGG--GGA-G-----CGUU-CC-G-UAG-------------------------------------------------------------------------------------------------------------------------U-A-GGA-A-GAA-GC-AG-U-A-GC--GGCAA---G-CA--G-CU-GUGGAC-GA-GA-CG-GAA-GUGA-GAA-UGU-CGG--CUUG-AGUA--GCG--CAAA-C-AUU-GGUGA-GAA-UCCAA-UG---CCCC-GAA-ACC-C-UA-----------------------------------------------------AGG-GUU-CCA-G-AG-CCAGG-UUC-GU-C--CA--CUCUGGGU--UAGU-CGGG-A-CCUAAGGCGAG--GC-C-----GAAA---G-G-C-GU-AGUCG--AUGG-ACAC-AGG-G--UC-AACAAUC-CCUGAC-ua-u--gg-uau-gg----------------------------------------------------------------ga-gcauugcu-----------------------------------------------------------------ag--gga-cgcau--gaaagau--agcu-a-----cg-cc-c------ugau--ugguu----------------------------------------------------------------------------------------------------------------------------------------------------ugg-------------------------------------------------------gagg-ag-u-uuacg-aa-------------cuccg--------------------------------------------------------------------------------------------------------------------------------------------------ag--uagugaaggau--agug-------------------------------------------------------------------------------------------------------------------------u-------------------------------c-aagaaa-agcu------ag----u-------------------------------------------------------------------------------------------------------------aaugugaugaacauau-cgu----aCC-CGUA-CCCGAAACCGACACAGGUAG-GGAGGU-U-GAGAA-UACCAA-GGGGCGCGAG-AUAA-CUCUCUCU---------------AAGGAA-CUCGG-CA----------AAAUGGC-CCC-GUAAC--UUCG-GA-AG-AAGGGGU-G-CCCAC----------------------------cgauga-g--------------------------GUGGG-UCGC-AGUGA-AGAGAUC-CA-GGCGACU-GUUUACCAAAAACACAGGUC-UCCGCAAACUCGUA-A------GAG-GA-A-GUAU-GGGGGCUGA-CGCCUGCCCAGU-GCCG-GAAGG-UUAAGGAAGUU-GGUCA-GGGC-----G-AAA--------------GUUUGA-AGCUGACGACCGAAG-CCCCGGUGAAC-GGC-GGCC-GUAACUAUAACGGU-CCUAAGGUAGCG-AAAUU-CCUU-GUC-GGGUAAGUUCCGACCCGCACGAA-AGGC-GUAACGA-UCUGGAU-GGUG-UCU-CAGA-GAGAGACUCGGCGAA-AUA-GGAAU-GU-CUGUG--AA-GAU-A-CGGACUGCCUGCACC-UGGACAGAAAGACCCUAUGAAGCUU-UACUGUAGCCUGGAAUUGUGUCCGG-GCUUCGCUU-GCGCAGGAUAGGUGG-GAAGCGAU-GAA-G------UAU-UCCUUGUGGGGAAUAU-GGAGCUAAC-G-GUGAGAUACCACUCU----GG-CGAAGCU-AGGA-UUCUAA-CUU--A-U---UUCCG---UGAUCCGGAAA-AAG-GACAGUUUCAGGUGGG-CAGU-UUGAC-U-GGGGCGGUCGCC-U-CCUAA-AAGGUA-ACGGAGGCGCGCAAAG-GUUCCCUCAGCACGCUUGGAAACCGUGC-GGC---GAGUGUAAAGGCAUAAAGG-GAGCUUGACUGCAAGACCGACAAGUCGAGCAGGUACGAAAGU-AGG-CCUUAGUGAUC-CGACGGCG-CA-G-AAUGGAAUGGCCGUCGCUCAAC-GGAUAAAAGUUA-CUC-UAGG-G-AU-AACAG-GCUGA--UCUCCCCCAAG-A-G-UCC-ACA-UCGACGGGG-AG-GU-UUGGCACCU-CGAUGUCGGCUCAUCGCAACCUGGGGCGGAAGU---A-CGUC-CC-AAGGGU-UG-GGCU-GUU-CGC--CCAUUA-AAGCGGU-AC-G-UGA-GCUGGGUUCA-GAACGU-CGUGA-GACAGUU-CGG-U-CCAU-AU-CCGGUGCAGG-CG-UAAGAGCAUU-GA-G-AGGAGC-CUU--------------CCUUAGUACGAGA-GGACC-GGGAAGGA-CGCACCG--CUGGUGU--ACCAGUUAUUGU-AC-CC-GCAGUAGA-CGC-UGGGUA-GCC-AAGU-G-CGGAGCGGAUAACCGCUGAAAGCAUCUAAGU-GGGAAGCCCA-CCUCAAG-AUGA-GUGCUCUCAC-UAC--------------ACCA-------------------------------------------------------------------------------------------A-------------GUA-G--GU-AAGG-UC-ACGGGCAGAAC-ACCCGUU--UAUAGGCU-CU-AAGUG-GAAGUGCA--GUAA---UGUAU-GA-AGCUG-A-GGAGUACUAACA-GACCG-A-GG-GCUUGA-CC-UC---------------------------------------------------------------------------------------------------------------------------------------------------
>Accession:CP000251::SeqID:15206::TaxID:2
------------------------------------------------------------------------------------------------------------------------------------------------------------------------------------------------AAGC-U-AC----UAA-GGG-CAUG-UG-GUG-GAUG--CCU-UG-GC-UC-UAGG-A-GGC-GACGAAG-GA--C-GU-GGGUA--GC-U-GC-G-AUAA-GCU-A-CGGG--GAGCC-G-CU-AACC---AGGC-UU-U-GAUC-CGUAG-AUU-UC-CGAAUGGGGAAA-CCC--G-CG-GCGG-----------------------------------------------------------------------------------------------------------------------------------------------------------------------------------------------------------------------------------------guaaua-----------CU-GC-CGC-AUCC-C-GUGA--U-----------------------------------------------------------------------------------------------------------------------------------------------------------------------------------------------------------------------------------------------GA-AUC-CA--UA----GUC-AC-G----G-G--A-AG-C-GAACCC-GGG-G-AAGUGAAACAUCU-CA-GUA-CCCGGAG-GAAAAGA-AA-GC-a-a-aca------GC-GAUUCC-GU-CAG-UAGU-GGCG-AGCGA-ACG-CGGAACUA-GCCCA-A-A-ccgggu-ggac------------gcga----------------gucc-aucug-ggguug--aggg--------------------------------------------------------------------------------------------------------------------------------------------------------------------------gc-gcaau-------------------------------ggggaugacCCGGGAgaaaagc-aucggu--aG-GU-GAGC-C-G-U-C-U-GGAA-A-G-GCGG-ACCACAG-AGGG-UGACAGUCCCGU-A-ACC-gaa-accgau-cg--uguauc-----uccugau-ugc-guaccc---------------------------------------------------------------------------AAGUA-AGG-C-GGGA--CAC-GUG-UAAUCCU-GC-C-U-GAAUCU--GCG-AGGACCAU--CU-CGU-AAGG-CUAA----AUA-CUAC-CUAGAGACC-GAUAGUG-AACA-AGUA-CCGCGA-GG-GA-AAGGUGAAAA-GAACCCC-UGUUA-GGGGA--GUCAAA--AGAACCUGAAA-CCGC--AUGCCUACAA-G-C-AGUC-CGA-GG-GC--uau---gccgc---------------------------------------------------------------------------------------------------------------------------------------------------------------------------------------------------------------------------------------------------------------------------------------------------------------------------------------------------------------------------------------------------------------------------------------------------------------------------------------------------------------------------------------------------------gcaa----------------------gcgga------------------a--c-GC--C-UGAG-GGCGUACCU-U-UUG-CAUCAUGAAUCGGCGACUU-AA-U-GGU-UGU-GGC----GAGCUUAA-GGC--------GAUA--GCC-GG-AGGCGCA--GCGAAA-GCGAG-UCC-G-A---AACGGGCG----------------------------------------------------------------------------------------------------------------------------------------------------------------------------------------------------------------------------------------------------------------------------------------------------------------------------------------------------ccaG-UCGCAAU-CAUUAUAACCCG-AAGC-C-AG-GUGA-UCUACUCAUGG-CCAGGUUGAA-GCG-CGGGUA-AAAC-CGCGU-GGA-GGACCGAACU-CAU-GG-AG--GUUG-AAAACUUC-UGGG-AUGAG-CUGUGAGUA-G-GGGU--GAAAGGCC-AAUCAAAC-UUGG-UG-AUAGC-UGGUUCU-CCCCG--AAAG-AUAU-UUAG-GUAUCGG-CUCGGG-aaau-----U-ca-g--UU-CA-GGAGGUAG-AGC-ACU-GG-AACGG-C-UA---GG-GGUCC--uacc-AGAUUACCAA-CCCGUA-CCAAACUCCGAA-UG-CCU-G-A-A--ACUGU---UA-UCC-C-GGGACGCAGUC--GGUGGGUGAUAACAUUCAU--CGGC-GAGA-GGG-GAAUAA-CCCAGAUCGUCGGCUAAG-GU-CCCA-AAGUC-CAUG-C-UAA-GUGaucaca--aAAA-GGAUGUG-GUA-GCGCUUU--GACA-A-UCAGG-AGG-UUGGCUUAGAAGCAGCCAU--CCUUUAAAGAUAGC-GUAA-UA--------G-CUCAC-UGAU-------CAA------G-C-GAG-AC--UG-CGCCG--AAAAU-GUAU-C-GGGU--CU--CAAGCA-UGG-C--ACC-GAA-G-CCAC-GGGA--UC-AGC----------gcaa--------------------------------------------------------------------------------------------------------------------------------------------------------------------------------------------------------------------------------------------------------------------------------------------------------------------------------------------------------------------------------------------------------------------------------------------------------------------GC-U-GA--UC-GG-UAGG--GGA-G-----CAUA-GA-A-CG--------------------------------------------------------------------------------------------------------------------------G-A-CGG-U-GAA-GC-CA-G-A-CC--GCAA----G-GA--C-UG-GUGGAG-UG-CG-UU-CUA-GAGC-UGA-UGC-CGA--UAUG-AGUA--GCG--ACAA-A-ACG-AGUGA-GAA-ACUCG-UU---CGCC-GUA-AGC-C-CA-----------------------------------------------------AGG-UUU-CCU-G-GG-GAAGG-UUA-AU-C--CG--CCCAGGGU--UAGU-CGGG-C-CCUAAGCCGAG--GC-C-----GAAA---G-G-C-GU-AGGUG--AUGG-ACAA-CAG-G--UU-AAUAUUC-CUGUAC-cg-c--cc-cgu-uggc-guu---------------------------------------------------------------------------------------------------------------------gaagcga-------g-ggg--gga-cggag--aagggua--gcgc-a---g-cc-gu-c-----ug--a--cgg-u-cg----u-----------------------------------------------------------------------------------------------------------g--a-cggu--ucaa-----------------gccc-g--uaggc--------------------------------------------gggccu-caua-cg-au-ga---aa-ag--g--ugacgccguuaa-------------------------------------------------------------------------------------------------------------------------------------------cgcc--ga--gaggug-auga-c-g-----------------------------------------------------ugg-cc---gca--a-----ggcc-------------------------------------u-gaa----gugcgu-gauccc--aug--c-uu-cc-uagaaa-auccccg-cgugga--------------------------------------------------------------------------------------------------------------------gu-caacg-ag---gc----gCC-CGUA-CCGCAAACCGACUCAGGUGG-GCGAGG-A-GAAAA-UCCUAA-GGCGCUUGAG-AGAA-CUCUGGUC---------------AAGGAA-CUCUG-CA----------AUUUUCC-ACC-GUAAC--UUCG-GA-AG-AAGGUGG-G-Cccgggauugug------------ua-ggga---cuugc---uccc-g----------aagcaau-gcuggg-uCGC-AGCGA-AAUGGCG-GU-AGCGACU-GUUUAACAAAAACACAGGAC-UCUGCAAACACGUC-AA-----GUG-GA-U-GUAU-AGGGUCUGA-CGCCUGCCCGGU-GCCG-GAAGG-UUAAGGAGAUU-CGUCA-GGCC-----G-CAA--------------GGCCAA-AGCGAUGAACCGAAG-CCCCGGUAAAC-GGC-GGCC-GUAACUAUAACGGU-CCUAAGGUAGCG-AAAUU-CCUU-GUC-GGGUAAGUUCCGACCUGCACGAA-AGGC-GUAACGA-CUUCCGC-GCUG-UCU-CGAC-CAGGGACUCAGCGAA-AUU-GAAAU-AG-CUGUG--CC-GAU-G-CAGUUUACCCGCGGC-AAGACGGAAAGACCCCAUGAACCUU-UACUACAACUUGCCACUGACACUAG-GAAUUGAUU-GUGUAGGAUAGGUGG-GAGCCUAU-GAA-C------CCU-GGGCGCUAGCUCGGGG-GGAGGCAAC-G-GUGAAAUACCACCCU----GU-CGAUUUC-UGGU-GUCUAA-CCU-GG-A----CCCC---UCAUCGGGGUU-GGG-GACAAUGGCUGGUGGG-UAGU-UUGAC-U-GGGGCGGUCGCC-U-CCCAA-AAGGUA-ACGGAGGCGCGCUAUG-GUUCCCUCAGCCUGAUUGGAAACCAGGC-GUC---GAGUGCAAUGGCAUAA-GG-GAGCUUGACUGCGAGACCGACAGGUCGAGCAGGUGCGAAAGC-AGG-UCAUAGUGAUC-CGGUGGUU-CU-G-UAUGGAAGGGCCAUCGCUCAAC-GGAUAAAAGGUA-CUC-UGGG-G-AU-AACAG-GCUUA--UCGCGUCCAAG-A-G-UUC-ACA-UCGACGACG-CG-GU-UUGGCACCU-CGAUGUCGGCUCAUCGCAUCCUGGGGCUGGAGC---A-GGUC-CC-AAGGGU-UU-GGCU-GUU-CGC--CAAUUA-AAGCGGU-AC-G-CGA-GCUGGGUUCA-AAACGU-CGUGA-GACAGUU-UGG-U-CCCU-AU-CUGCCGUGGG-CG-UAGGAGAAGU-GA-G-AGGAUC-UGU--------------CCUUAGUACGAGA-GGACC-GGGAUGGA-CGCACCG--CUGGUGU--ACCAGUUGUCUC-GC-CA-GAGGCA-U-CGC-UGGGUA-GCU-AUGU-G-CGGAACGGAUAACCGCUGAAAGCAUCUAAGC-GGGAAGCCAA-CCUCAAG-ACGA-CUUCUCCCGG-GCG--------------caag---------------------------------------------------------------------------------------------------------CCC-C--UG-AAGC-CC-CCUCGAAGACG-ACGAGGUC-GAUAGGCC-GG-AGGUG-UACGCGCU--GUGA---GGCGC-UC-AGCUG-A-CCGGUACUAAUA-GGGCG-UGCG-GCUUGG-UC-UCccuuuucu-------------------------------------------------------------------------------------------------------------------------------------------
>Accession:CP000251::SeqID:15207::TaxID:2
------------------------------------------------------------------------------------------------------------------------------------------------------------------------------------------------AAGC-U-AC----UAA-GGG-CAUG-UG-GUG-GAUG--CCU-UG-GC-UC-UAGG-A-GGC-GACGAAG-GA--C-GU-GGGUA--GC-U-GC-G-AUAA-GCU-A-CGGG--GAGCC-G-CU-AACC---AGGC-UU-U-GAUC-CGUAG-AUU-UC-CGAAUGGGGAAA-CCC--G-CG-GCGG-----------------------------------------------------------------------------------------------------------------------------------------------------------------------------------------------------------------------------------------guaaua-----------CU-GC-CGC-AUCC-C-GUGA--U-----------------------------------------------------------------------------------------------------------------------------------------------------------------------------------------------------------------------------------------------GA-AUC-CA--UA----GUC-AC-G----G-G--A-AG-C-GAACCC-GGG-G-AAGUGAAACAUCU-CA-GUA-CCCGGAG-GAAAAGA-AA-GC-a-a-aca------GC-GAUUCC-GU-CAG-UAGU-GGCG-AGCGA-ACG-CGGAACUA-GCCCA-A-A-ccgggu-ggac------------gcga----------------gucc-aucug-ggguug--aggg--------------------------------------------------------------------------------------------------------------------------------------------------------------------------gc-gcaau-------------------------------ggggaugacCCGGGAgaaaagc-aucggu--aG-GU-GAGC-C-G-U-C-U-GGAA-A-G-GCGG-ACCACAG-AGGG-UGACAGUCCCGU-A-ACC-gaa-accgau-cg--uguauc-----uccugau-ugc-guaccc---------------------------------------------------------------------------AAGUA-AGG-C-GGGA--CAC-GUG-UAAUCCU-GC-C-U-GAAUCU--GCG-AGGACCAU--CU-CGU-AAGG-CUAA----AUA-CUAC-CUAGAGACC-GAUAGUG-AACA-AGUA-CCGCGA-GG-GA-AAGGUGAAAA-GAACCCC-UGUUA-GGGGA--GUCAAA--AGAACCUGAAA-CCGC--AUGCCUACAA-G-C-AGUC-CGA-GG-GC--uau---gccgc---------------------------------------------------------------------------------------------------------------------------------------------------------------------------------------------------------------------------------------------------------------------------------------------------------------------------------------------------------------------------------------------------------------------------------------------------------------------------------------------------------------------------------------------------------gcaa----------------------gcgga------------------a--c-GC--C-UGAG-GGCGUACCU-U-UUG-CAUCAUGAAUCGGCGACUU-AA-U-GGU-UGU-GGC----GAGCUUAA-GGC--------GAUA--GCC-GG-AGGCGCA--GCGAAA-GCGAG-UCC-G-A---AACGGGCG----------------------------------------------------------------------------------------------------------------------------------------------------------------------------------------------------------------------------------------------------------------------------------------------------------------------------------------------------ccaG-UCGCAAU-CAUUAUAACCCG-AAGC-C-AG-GUGA-UCUACUCAUGG-CCAGGUUGAA-GCG-CGGGUA-AAAC-CGCGU-GGA-GGACCGAACU-CAU-GG-AG--GUUG-AAAACUUC-UGGG-AUGAG-CUGUGAGUA-G-GGGU--GAAAGGCC-AAUCAAAC-UUGG-UG-AUAGC-UGGUUCU-CCCCG--AAAG-AUAU-UUAG-GUAUCGG-CUCGGG-aaau-----U-ca-g--UU-CA-GGAGGUAG-AGC-ACU-GG-AACGG-C-UA---GG-GGUCC--uacc-AGAUUACCAA-CCCGUA-CCAAACUCCGAA-UG-CCU-G-A-A--ACUGU---UA-UCC-C-GGGACGCAGUC--GGUGGGUGAUAACAUUCAU--CGGC-GAGA-GGG-GAAUAA-CCCAGAUCGUCGGCUAAG-GU-CCCA-AAGUC-CAUG-C-UAA-GUGaucaca--aAAA-GGAUGUG-GUA-GCGCUUU--GACA-A-UCAGG-AGG-UUGGCUUAGAAGCAGCCAU--CCUUUAAAGAUAGC-GUAA-UA--------G-CUCAC-UGAU-------CAA------G-C-GAG-AC--UG-CGCCG--AAAAU-GUAU-C-GGGU--CU--CAAGCA-UGG-C--ACC-GAA-G-CCAC-GGGA--UC-AGC----------gcaa--------------------------------------------------------------------------------------------------------------------------------------------------------------------------------------------------------------------------------------------------------------------------------------------------------------------------------------------------------------------------------------------------------------------------------------------------------------------GC-U-GA--UC-GG-UAGG--GGA-G-----CAUA-GA-A-CG--------------------------------------------------------------------------------------------------------------------------G-A-CGG-U-GAA-GC-CA-G-A-CC--GCAA----G-GA--C-UG-GUGGAG-UG-CG-UU-CUA-GAGC-UGA-UGC-CGA--UAUG-AGUA--GCG--ACAA-A-ACG-AGUGA-GAA-ACUCG-UU---CGCC-GUA-AGC-C-CA-----------------------------------------------------AGG-UUU-CCU-G-GG-GAAGG-UUA-AU-C--CG--CCCAGGGU--UAGU-CGGG-C-CCUAAGCCGAG--GC-C-----GAAA---G-G-C-GU-AGGUG--AUGG-ACAA-CAG-G--UU-AAUAUUC-CUGUAC-cg-c--cc-cgu-uggc-guu---------------------------------------------------------------------------------------------------------------------gaagcga-------g-ggg--gga-cggag--aagggua--gcgc-a---g-cc-gu-c-----ug--a--cgg-u-cg----u-----------------------------------------------------------------------------------------------------------g--a-cggu--ucaa-----------------gccc-g--uaggc--------------------------------------------gggccu-caua-cg-au-ga---aa-ag--g--ugaggccguuaa-------------------------------------------------------------------------------------------------------------------------------------------cgcc--ga--gaggug-auga-c-g-----------------------------------------------------ugg-cc---gca--a-----ggcc-------------------------------------u-gaa----gugcgu-gauccc--aug--c-uu-cc-uagaaa-auccccg-cgugga--------------------------------------------------------------------------------------------------------------------gu-caacg-ag---gc----gCC-CGUA-CCGCAAACCGACUCAGGUGG-GCGAGG-A-GAAAA-UCCUAA-GGCGCUUGAG-AGAA-CUCUGGUC---------------AAGGAA-CUCUG-CA----------AUUUUCC-ACC-GUAAC--UUCG-GA-AG-AAGGUGG-G-Cccgggauugug------------ua-ggga---cuugc---uccc-g----------aagcaau-gcuggg-uCGC-AGCGA-AAUGGCG-GU-AGCGACU-GUUUAACAAAAACACAGGAC-UCUGCAAACACGUC-AA-----GUG-GA-U-GUAU-AGGGUCUGA-CGCCUGCCCGGU-GCCG-GAAGG-UUAAGGAGAUU-CGUCA-GGCC-----G-CAA--------------GGCCAA-AGCGAUGAACCGAAG-CCCCGGUAAAC-GGC-GGCC-GUAACUAUAACGGU-CCUAAGGUAGCG-AAAUU-CCUU-GUC-GGGUAAGUUCCGACCUGCACGAA-AGGC-GUAACGA-CUUCCGC-GCUG-UCU-CGAC-CAGGGACUCAGCGAA-AUU-GAAAU-AG-CUGUG--CC-GAU-G-CAGUUUACCCGCGGC-AAGACGGAAAGACCCCAUGAACCUU-UACUACAACUUGCCACUGACACUAG-GAAUUGAUU-GUGUAGGAUAGGUGG-GAGCCUAU-GAA-C------CCU-GGGCGCUAGCUCGGGG-GGAGGCAAC-G-GUGAAAUACCACCCU----GU-CGAUUUC-UGGU-GUCUAA-CCU-GG-A----CCCC---UCAUCGGGGUU-GGG-GACAAUGGCUGGUGGG-UAGU-UUGAC-U-GGGGCGGUCGCC-U-CCCAA-AAGGUA-ACGGAGGCGCGCUAUG-GUUCCCUCAGCCUGAUUGGAAACCAGGC-GUC---GAGUGCAAUGGCAUAA-GG-GAGCUUGACUGCGAGACCGACAGGUCGAGCAGGUGCGAAAGC-AGG-UCAUAGUGAUC-CGGUGGUU-CU-G-UAUGGAAGGGCCAUCGCUCAAC-GGAUAAAAGGUA-CUC-UGGG-G-AU-AACAG-GCUUA--UCGCGUCCAAG-A-G-UUC-ACA-UCGACGACG-CG-GU-UUGGCACCU-CGAUGUCGGCUCAUCGCAUCCUGGGGCUGGAGC---A-GGUC-CC-AAGGGU-UU-GGCU-GUU-CGC--CAAUUA-AAGCGGU-AC-G-CGA-GCUGGGUUCA-AAACGU-CGUGA-GACAGUU-UGG-U-CCCU-AU-CUGCCGUGGG-CG-UAGGAGAAGU-GA-G-AGGAUC-UGU--------------CCUUAGUACGAGA-GGACC-GGGAUGGA-CGCACCG--CUGGUGU--ACCAGUUGUCUC-GC-CA-GAGGCA-U-CGC-UGGGUA-GCU-AUGU-G-CGGAACGGAUAACCGCUGAAAGCAUCUAAGC-GGGAAGCCAA-CCUCAAG-ACGA-CUUCUCCCGG-GCG--------------caag---------------------------------------------------------------------------------------------------------CCC-C--UG-AAGC-CC-CCUCGAAGACG-ACGAGGUC-GAUAGGCC-GG-AGGUG-UACGCGCU--GUGA---GGCGC-UC-AGCUG-A-CCGGUACUAAUA-GGGCG-UGCG-GCUUGG-UC-UCccuuuucu-------------------------------------------------------------------------------------------------------------------------------------------
>Accession:AY048815::SeqID:15320::TaxID:2
--------------------------------------------------------------------------------------------------------------------------------------------------------------------------------------------------------------AA-GAG-CACU-UG-AUG-GAUG--CCU-UG-GC-GC-UAAG-A-GGU-GAUGAAG-GA--C-GU-GGUAG--GC-U-GC-G-AUAA-GCU-G-CGGG--GAAUU-G-UC-AACA----AGU-UU-UG-AUC-CGCAG-AUG-UC-CGAAUGGGGAAA-CCC--G-GC-CAA--------------------------------------------------------------------------------------------------------------------------------------------------------------------------------------------------------------------------------------------uucg------------U-UG-GCC-AUUG-C-AUGC--U-----------------------------------------------------------------------------------------------------------------------------------------------------------------------------------------------------------------------------------------------GA-AUA-CA--UA----GGU-AU-G----C-A--A-GA-C-GAACCC-GGU-G-AACUGAAAUAUCU-AA-GUA-GCCGGAG-GUAAGGA-AA-UC-A-A-AAU------GA-GACUCC-GU-UAG-UAGU-GACG-AGCGA-ACG-CGGA-ACA-GGUC---------------------------------------------------------------------------------------------------------------------------------------------------------------------------------------------------------------------------------------------------------u----------------------------------------guggucugu--aa-uuagaa--aC-UG-GAAU-G-C-C-U-U-GGAA-A-A-GGCA-ACCGUAG-GGGG-UGAUAGUCCCGU-A-CAG-gua-agaagg-uu--gcagauc--------------------------------------------------------------------------------------------cuu--GAGUA-GGG-C-GGGG--CAC-GUG-GAACCCU-GU-C-U-GAAUUU--AGG-GGGACCAU--CC-UCU-AAAC-CUAA----GUA-CUCC-UUAGCGACC-GAUAGUG-AACA-AGUA-CCGUGA-GG-GA-AAGGUGAAAA-GAACCCC-GGUGA-GGGGA--GUGAAA-UAGAACCUGAAA-UCGG--GUGCUUACAA-U-CAAGUU-GGA-GC-UU----G-------------------------------------------------------------------------------------------------------------------------------------------------------------------------------------------------------------------------------------------------------------------------------------------------------------------------------------------------------------------------------------------------------------------------------------------------------------------------------------------------------------------------------------uguagguuuugcagcuugcuuguaaucccugca-----------------------------------------------U-GG--G-UGAC-AGCGUACCU-U-UUG-CAUAAUGGGUCAGCGAGUU-AA-U-CUG-UUG-AGC----AAGCUUAA-GCC-------G-UUA--GGU-GU-AGGCGUA--GCGAAA-GCGAG-UCU-GAA---UAGGGCGU---------------------------------------------------------------------------------------------------------------------------------------------------------------------------------------------------------------------------------------------------------------------------------------------------------------------------------------------------uuUAG-UUCAAUG-GAUUA-GACCCG-AAAC-C-AA-GUGA-UCUAGCCAUGG-CCAGGUUGAA-GGU-GUAGUA-AAGU-ACAUU-GGA-GGACCGAACC-UGU-UA-CU--GUUG-CAAUAGUA-UUGG-AUGAG-CUGUGGCUA-G-GGGU--GAAAGGCC-AAUCAAAC-UUGGGAA-AUAGC-UGGUUCU-CCGCG--AAAU-CUAU-UUAG-GUAGAGC-GUUGUA-CUAu-----A-AG-U--UG-CC-GGGGGUAG-AGC-ACU-GA-AUGGA-C-UA---GG-GAGAC--ucaucCUCUUACCAA-AUCCAA-UCAAACUCCGAA-UA-CCG-G-U-C--aacugu---u-CUA-C-AGCAGACACAC--UGCGGGUGCUAA-GUCCGU--GGUG-GAAA-GGG-AAAGAG-CCCAGAUCGCCGUCUAAG-GU-CCCA-AAGUU-AUGG-C-UAA-GUG--------UGGAAGGAGGUG-AGA-AGACCAA--UACA-G-CUAGU-AGG-UUGGCUUAGAAGCAGCCAU--CCUUUAAAGAAAGC-GUAA-CA--------G-CUCAC-UUGUCUAGAUUUAA------G-U-CUU-CU--UG-CGCCG--AAGAU-GUAA-C-GGGG--CU--AAAGCC-AUA-C--GCC-GAA-G-ACGC-GAgu--gc-ccgg---------cuug-------------------------------------------------------------------------------------------------------------------------------------------------------------------------------------------------------------------------------------------------------------------------------------------------------------------------------------------------------------------------------------------------------------------------------------------------------------------ccg-g-gu--gc-GG-UAGC--GGA-G-----CGUU-UC-G-UAA-------------------------------------------------------------------------------------------------------------------------G-C-CUG-U-GAA-GG-UG-G-C-CC--GUGA----G-GG--U-UG-CUGGAG-GU-AU-CG-AAA-GUGA-GAA-UGC-UGA--CAUG-AGUA--GCG--UAAA-G-GAG-UGUGA-AAA-CCACU-CC---CGCC-GAA-AAC-C-UA-----------------------------------------------------AGG-UUU-CCU-G-UG-UUAAG-UCA-AU-C--UG--CGCAGGGU--UAGU-CGGA-C-CCUAAGGCGAG--GC-C----GUAAA---G-G-A-GU-AGUCG--AUGG-GAAU-CAG-G--UU-AAUAUUC-CUGAAC-cu-u--uu-aag-----------------------------------------------------------------------------------------------------------------------------------------------cg--uga-cg-ga----ucuugu-gcag-u---g-cg-ug-u-----cuuau--uggau-ug----------------------------------------------------------------------------------------------------------------a--c-gcgu----------------------------------------------------------------------------------------------------------------------------------------------------------------------------------------------------------------------------------------------------------------------------------------------------------------------------------------------------------------------------------------------------------------------------gcuuu--aaagag-------g-uc-cc-aggaaa-ua-------------------------------------------------------------------------------------------------------------------------------gcgcuuaaguuaa-uaa----gUC-CGUA-CCGCAAACCGACACUGGUAG-GUGGGU-A-GAGUA-UACUAA-GGCGAUUGAG-AGAA-CGAUGCUG---------------AAGGAA-CUCGG-CA----------AAUUGCA-CCU-GUAAC--UUAG-GG-AG-AAGGGUG-A-CCUGU----GGG----------------UGG---GCAA----CCA---------------CCU----GUGGG-UGGC-ACAGA-GCAGGGG-GU-AGCGACU-GUUUACUAAAAACACAGGGC-UCUGCAAACACGUA-A------GUG-GA-A-GUAU-AGGGCCUGA-CGCCUGCCCGGU-GCUG-GAAGG-UUAAUAUGAGG-GGU------------G-AGA----------------------GCUCCGAGUUGAAG-CCCCAGUAAAC-GGC-GGCCCGUAAAACUGACGGU-CCUAAGGUAGCG-AAAUU-CCUU-GUC-GGGUAAGUUCCGACCCGCACGAA-UGGC-GUAACGA-UUUCCCC-GCUG-UCU-CCAG-CAUCGACUCAGCGAA-AUUUGAAUUUCC-CCGUNCCUU-GAUUGCCGGGGUACCC-----------------------------------------------------------------------------------------------------------------------------------------------------------------------------------------------------CGCCUCUGGAGC-UAG-GACAUUGUAUGGUGGG-UAGU-UUGAC-U-GGGGCGGUCGCC-U-CCUAA-AGAGUA-ACGGAGGCGUGCGAUG-GUAGGCUAGGGCUGGUCGGAAAUCAGCU-UUU--AUAGUACAAUGGCAAAA-GC-CUGCCUGACUGCGAGGCCGACGGGCCGAGCAGAGACGAAAGU-CGG-UCAUAGUGAUC-CGGUGAUU-CC-G-UAUGGAAGGGUCAUCGCUCAAC-GGAUAAAAGGUA-CGC-CGGG-G-AU-AACAG-GCUUA--UGGUGCCCAAG-A-G-UUC-AUA-UCGACGGCA-CC-GU-UUGGCACCU-CGAUGUCGACUCAUCACAUCCUGGGGCUGGAGC---A-GGUC-CC-AAGGGU-U-----------------------------------------------------------------------------------------------------------------------------------------------------------------------------------------------------GU-GC-CA-ACAGCA-U-AGC-UGGGUA-GCU-ACGU-A-UGGACGGGAUAAUUGCUGAAAGCAUCUAAGC-GAGAAACCCC-CCUCAAG-AUUA-GAUUUCCCC---------------------------------------------------------------------------------------------------------------------------------------aU-UAGG-GC-CGUGAGAGACU-AUCACGUU-GAUAGGCC-GG-GUGUG-UAAGUGCG--GUAA---CGUAU-UU-AGCUG-A-CCGGUUCUAAUA-GCCCG-AUUG-GUUUA----------------------------------------------------------------------------------------------------------------------------------------------------------
>Accession:AF416766::SeqID:15432::TaxID:2
[truncated: 16,848,275 more chars]
