# Supplementary material for: Structural Constraints Identified with Covariation Analysis in Ribosomal RNA
Source: PLoS One. 2012 Jun 19;7(6):e39383. doi: 10.1371/journal.pone.0039383 (PMC3378556; doi:10.1371/journal.pone.0039383)
Supplement: Table S3 — The unique and common pairs identified by PEC/JN-Best, MIxy/JN-Best and MIp/JN-Best using the 16S, 5S and 23S rRNA data sets. (XLS) [file pone.0039383.s011.xls]

## Sheet: Sheet1
	Table S3. The unique and common pairs identified by different methods in 16S, 5S and 23S rRNA data sets
			16S rRNA Data Set		5S rRNA Data Set		23S rRNA Data Set		Overall
			MIxy/JN-Best union MIp/JN-Best
			TruePositive	FalsePositive	TruePositive	FalsePositive	TruePositive	FalsePositive	TruePositive	FalsePositive
		Common	120	3	18	3	215	44	353	50
	MIxy/JN-Best	Unique	1	0	0	0	11	1	12	1
	MIp/JN-Best	Unique	27	3	4	0	103	19	134	22
		Total	148	6	22	3	329	64	499	73
			PEC/JN-Best union (MI/JN-Best union MIp/JN-Best as MI/JN-Best)
			TruePositive	FalsePositive	TruePositive	FalsePositive	TruePositive	FalsePositive	TruePositive	FalsePositive
		Common	91	2	12	1	55	3	158	6
	PEC/JN-Best	Unique	95	6	1	0	63	20	159	26
	MI/JN-Best	Unique	57	4	10	2	274	61	341	67
		Total	243	12	23	3	392	84	658	99
