# Supplementary material for: Structural Constraints Identified with Covariation Analysis in Ribosomal RNA
Source: PLoS One. 2012 Jun 19;7(6):e39383. doi: 10.1371/journal.pone.0039383 (PMC3378556; doi:10.1371/journal.pone.0039383)
Supplement: Table S6 — The evaluation of the “new putative interactions in 16S Rrna” discovered by 2 other groups. (XLS) [file pone.0039383.s014.xls]

## Sheet: Sheet1
	Table S6. The evaluation of the "new putative interactions in 16S rRNA" discovered by 2 other groups
	Research Group	Annotation	ColumnOrdinal1	ColumnOrdinal2	EcoliNT1	EcoliNT2	ThermNT1	ThermNT2	TotalEvents	CPE (%)	PositiveEvents	PairCount	PhysicalDist
	GaltierGroup	Long-distance	1588	2697	690	1233	673	1214	80	11.25	9	4118	57.755
			2393	2654	1075	1202	1057	1183	80	11.25	9	4129	49.0598
			2403	2654	1082	1202	1064	1183	77	11.6883	9	4129	48.128
		Short-distance	2945	2946	1415	1416	1397	1398	78	14.1026	11	3981	4.16106
			2946	3127	1416	1485	1398	1462	86	11.6279	10	3281	3.85724
		Found as "neighbor factor" by Gutell Group	3173	3174	1520	1521	1497	1498	64	34.375	22	1839	3.92251
	HausslerGroup	Identified in 16S rRNA secondary structure comparative model by Gutell Group in 2000	131	351	70	98	70	92	417	58.9928	246	3635	3.04515
			1545	1690	658	747	641	730	272	19.8529	54	1602	2.94014
			3029	3032	1450	1453	1430	1433	456	41.2281	188	3497	4.59206
		E. coli Specific nucleotides (the crystal structure of E. coli 16S rRNA is of low resolution)	133	351	71	98	NULL	92	200	9.5	19	1961	NULL
			133	353	71	99	NULL	93	125	20.8	26	1979	NULL
			134	138	72	75	NULL	NULL	228	24.5614	56	1433	NULL
			134	349	72	97	NULL	NULL	147	8.84354	13	1580	NULL
			134	351	72	98	NULL	92	198	30.8081	61	1609	NULL
			136	348	73	96	NULL	NULL	257	16.3424	42	1788	NULL
			136	353	73	99	NULL	93	209	20.0957	42	2021	NULL
			136	356	73	100	NULL	NULL	90	18.8889	17	1595	NULL
			137	1690	74	747	NULL	730	157	15.2866	24	1038	NULL
			347	351	95	98	NULL	92	310	23.5484	73	1680	NULL
			584	870	202	215	NULL	NULL	76	50	38	1915	NULL
		Found as "neighbor factor" by Gutell Group	2229	2306	1029	1032	1009	1012	235	47.234	111	3867	10.0156
			3167	3174	1515	1521	1492	1498	62	30.6452	19	1794	3.487
		Other pairs	882	2199	223	1021	218	999	932	20.7082	193	4000	166.848
			414	2180	139	1010	133	988	962	21.4137	206	4065	161.823
			414	2195	139	1019	133	997	967	20.9928	203	4075	158.689
			1488	2780	617	1289	600	1270	25	8	2	4112	131.817
			1471	1838	602	838	585	821	700	19.2857	135	3943	72.6912
			1962	2897	865	1382	842	1364	8	0	0	4077	47.0515
			932	1093	245	351	240	346	52	0	0	4094	40.3327
			479	551	183	193	177	193	886	19.3002	171	3991	18.9797
			2161	2197	1001	1020	979	998	1002	24.0519	241	4066	18.4268
			2170	2203	1005	1024	983	1002	338	34.6154	117	3817	11.3566
			2780	2857	1289	1352	1270	1333	20	0	0	4130	9.06954
			2143	2340	998	1041	975	1023	479	25.261	121	4104	8.80683
			2180	2199	1010	1021	988	999	976	29.3033	286	4029	8.69639
			1253	1256	464	467	453	456	360	27.5	99	3107	7.34191
			2177	2201	1008	1022	986	1000	920	28.4783	262	3964	6.79102
			2176	2199	1007	1021	985	999	856	30.6075	262	4031	5.77371
			1489	1496	618	621	601	604	24	8.33333	2	4073	5.66267
			1734	1788	771	807	754	790	128	17.9688	23	4093	4.0658
			131	353	70	99	70	93	496	23.9919	119	3631	3.47676
